# Supplementary material for: Incorporating RNA-seq data into the zebrafish Ensembl genebuild
Source: HighWire-hosted journal article supplement (doi:10.1101/gr.137901.112), 2012-07-12
Supplement: Supplemental_Table_1.xlsx [file Supplemental_Table_1.xlsx]

## Sheet: Sheet1
ENA Run ID	Lane name	Read length (runs paired ends)	Sample name	Total Alignments	Unpaired Alignments	Total Aligned reads	% of aligned paired	Total sequenced reads	% aligned	Library prep method	Intron spanning canonical splice	Intron spanning Non canonical splice	Intron spanning total aligned	Intron spanning% Canonical splice	% intron spanning	bwa aligned
ERR003999	910_7	36	3dpf	5177080	2143324	8210836	73.8964	12591946	65.207	polyT prime, nebulised	493720	7589	501309	0.984862	0.0398119
ERR004001	910_8	36	3dpf	4610448	1958970	7261926	73.0241	11334806	64.0675	polyT prime, nebulised	427869	6924	434793	0.984075	0.0383591
ERR004000	979_1	37	3dpf	4287300	1623934	6950666	76.6363	10022466	69.3509	polyT prime, nebulised	303668	6935	310603	0.977672	0.0309907
ERR003995	979_2	37	2dpf	4308048	1478844	7137252	79.2799	10080632	70.8016	polyT prime, nebulised	376056	14729	390785	0.962309	0.0387659
ERR003996	979_3	37	2dpf	4173603	1442035	6905171	79.1166	9798324	70.473	polyT prime, nebulised	359861	14343	374204	0.961671	0.0381906
ERR003997	979_5	37	2dpf	4142966	1378548	6907384	80.0424	9655416	71.539	polyT prime, nebulised	370439	13972	384411	0.963653	0.039813
ERR003990	979_6	37	1dpf	3857894	1698707	6017081	71.7686	11069668	54.3565	polyT prime, nebulised	323979	14812	338791	0.95628	0.0306053
ERR003991	979_7	37	1dpf	3687072	1627650	5746494	71.6758	10573344	54.3489	polyT prime, nebulised	307194	14289	321483	0.955553	0.030405
ERR003992	979_8	37	1dpf	3984887	2017212	5952562	66.1119	11543814	51.565	polyT prime, nebulised	309138	17384	326522	0.94676	0.0282855
ERR004025	1364_5	36	Ovary	3150775	2361018	3940532	40.0838	10930790	36.0498	random prime, nebulise	153809	5716	159525	0.964169	0.0145941
ERR004023	1364_6	36	Ovary	5462750	2592974	8332526	68.8813	13682436	60.8994	polyT prime, nebulised	408049	15121	423170	0.964267	0.030928
ERR004018	1364_7	37	male_head	7261688	2957247	11566129	74.4318	18585402	62.2323	polyT prime, nebulised	588552	15397	603949	0.974506	0.0324959
ERR004019	1364_8	37	male_head	5958496	2613786	9303206	71.9045	16374724	56.8144	random prime, nebulise	417772	10274	428046	0.975998	0.0261407
ERR004027	1467_1	37	ovary	6248607	2507954	9989260	74.8935	14398736	69.376	chemical frag, random prime	410691	8826	419517	0.978962	0.0291357
ERR004009	1723_5	37	female_body	8377229	2510491	14243967	82.3751	20134190	70.7452	chemical frag, random prime	898373	28023	926396	0.969751	0.0460111
ERR004013	1723_6	37	female_head	7217236	2307066	12127406	80.9764	18118140	66.9352	chemical frag, random prime	557369	22808	580177	0.960688	0.0320219
ERR004003	1723_7	37	5dpf	8070368	2461853	13678883	82.0025	19870290	68.8409	chemical frag, random prime	764013	26909	790922	0.965978	0.0398043
ERR004011	1723_8	37	male_body	6969973	2117365	11822581	82.0905	17965622	65.8067	chemical frag, random prime	705801	29824	735625	0.959458	0.0409463
ERR004026	1851_2	37	ovary	7732205	2474834	12989576	80.9475	17110730	75.9148	random prime, nebulise	743812	23436	767248	0.969454	0.0448402	yes
ERR004024	1851_8	37	ovary	8141725	2532670	13750780	81.5816	17729036	77.5608	polyT prime, nebulised	833008	22052	855060	0.97421	0.0482294	yes
ERR004008	2208_3	37	14dpf	8852753	3560965	14144541	74.8245	22470140	62.9482	chemical frag, random prime	669161	35832	704993	0.949174	0.0313747	yes
ERR003998	2355_2	76	2dpf	9164555	3218528	15110582	78.7002	22286504	67.8015	polyT prime, nebulised	1658413	18369	1676782	0.989045	0.0752376	yes
ERR004002	2355_3	76	3dpf	9190358	3535128	14845588	76.1873	22236532	66.7622	polyT prime, nebulised	2132511	22650	2155161	0.98949	0.0969198	yes
ERR004010	2454_3	76	female_body	11346049	3782938	18909160	79.9942	27654200	68.3772	chemical frag, random prime	3048638	37007	3085645	0.988007	0.11158	yes
ERR004022	2454_5	76	male_head	9546633	3646849	15446417	76.3903	25118464	61.4943	random prime, nebulise	1727397	26514	1753911	0.984883	0.0698256	yes
ERR004012	2454_6	76	male_body	10005014	3794517	16215511	76.5995	26617080	60.9214	chemical frag, random prime	2340536	35050	2375586	0.985246	0.0892504	yes
ERR004020	2505_1	54	male_head	10367340	2742140	17992540	84.7596	24722870	72.7769	random prime, nebulise	2050166	40211	2090377	0.980764	0.0845524	yes
ERR004021	2505_2	54	male_head	11086116	3031094	19141138	84.1645	26553628	72.0848	random prime, nebulise	2158239	42719	2200958	0.980591	0.0828873	yes
ERR004029	2518_5	76	ovary	10319917	4081536	16558298	75.3505	21836194	75.8296	chemical frag, random prime	2457091	51124	2508215	0.979617	0.114865	yes
ERR003994	2518_6	76	1dpf	8892587	3614382	14170792	74.4941	18725266	75.6774	polyT prime, nebulised	1250391	23374	1273765	0.98165	0.0680239	yes
ERR004017	2518_7	76	female_head	7005963	2330797	11681129	80.0465	16829420	69.409	chemical frag, random prime	1645981	23759	1669740	0.985771	0.0992155	yes
ERR004007	2518_8	76	5dpf	6808869	2443675	11174063	78.1308	16218224	68.8982	chemical frag, random prime	1619776	20362	1640138	0.987585	0.101129	yes
ERR022480	2719_5	54	female_head	12706512	3301264	22111760	85.0701	30047968	73.5882	chemical frag, random prime	2456631	47882	2504513	0.980882	0.0833505	yes
ERR022481	2719_6	54	female_head	13237068	3488196	22985940	84.8247	31360384	73.2961	chemical frag, random prime	2540424	49430	2589854	0.980914	0.0825836	yes
ERR022482	2719_7	54	5dpf	13727321	3727072	23727570	84.2922	32679040	72.6079	chemical frag, random prime	2725552	47526	2773078	0.982862	0.084858	yes
ERR022483	2719_8	54	5dpf	13084437	3478518	22690356	84.6696	31080022	73.0062	chemical frag, random prime	2629833	45287	2675120	0.983071	0.086072	yes
ERR015562	3444_1	76	1dpf_3p	8248934	1334007	15163861	91.2027	17868968	84.8614	chemical frag, 3' pull down
ERR015563	3444_2	76	2dpf_3p	6027984	813525	11242443	92.7638	13030370	86.2788	chemical frag, 3' pull down
ERR015564	3444_3	76	3dpf_3p	9894999	2125820	17664178	87.9654	20687048	85.3876	chemical frag, 3' pull down
ERR015565	3444_5	76	5dpf_3p	8578859	1543744	15613974	90.1131	18416182	84.784	chemical frag, 3' pull down
ERR015566	3444_6	76	Ovary_3p	7564382	2502643	12626121	80.1788	15134122	83.4282	chemical frag, 3' pull down
ERR015567	3444_7	76	male_head_3p	8434153	1483255	15385051	90.3591	18210696	84.4836	chemical frag, 3' pull down
ERR015568	3444_8	76	male_body_3p	5774285	1221486	10327084	88.172	13324570	77.5041	chemical frag, 3' pull down
ERR022484	4946_5	76	2cells	23673830	6894511	40453149	82.9568	51941408	77.8823	chemical frag, random prime	8056738	141277	8198015	0.982767	0.157832	yes
ERR022485	4946_6	76	6hpf	32100264	11272867	52927661	78.7014	77769928	68.0567	chemical frag, random prime	5686626	112644	5799270	0.980576	0.0745696	yes
