# Supplementary material for: Incorporating RNA-seq data into the zebrafish Ensembl genebuild
Source: HighWire-hosted journal article supplement (doi:10.1101/gr.137901.112), 2012-07-12
Supplement: Supplemental_Table_2.xlsx [file Supplemental_Table_2.xlsx]

## Sheet: Sheet1
Ensembl Gene Name	Ensembl Transcript name	chr	start	end	strand	cdna accession number	cDNA length mapped to genome	cDNA coding length mapped to genome	Best match RNA-Seq model	RNA-Seq model start	RNA-Seq model end	RNA-Seq model length	RNA-Seq model coding length	RNA-Seq model coding end	Filtered for none matching coding transcript	Number of cDNA exons	Number of cDNA coding exons	Number of RNA-Seq exons	Number of RNA-Seq coding exons	Number of cDNA introns	Confirmed cDNA canonical introns	Confirmed cDNA non-canonical introns	Number of coding cDNA introns	Confirmed coding cDNA canonical introns	Confirmed coding cDNA non-canonical introns	Total canonical intron depth	Total non-canonical intron depth	cDNA vs RNA-Seq matching bases	cDNA vs RNA-Seq matching exons	Coding cDNA vs RNA-Seq matching bases	Coding cDNA vs RNA-Seq matching exons	Number of reads matching cDNAs	ENST stop position	RNA-Seq stop position	cdna 3' UTR	RNAseq 3' UTR	trim / extend	trim bp	extend bp	total length of gaps
ENSDARG00000000001	ENSDART00000000004	9	35083371	35093145	-1	BC057491.1	2478	1323	RNASEQT00000016929	35083229	35093191	4252	1392	1428	RNASEQG00000016929	8	6	7	7	7	7	0	5	5	0	327	0	2478	6	1323	5	2046	35086053	35086053	1096	2824	unchanged
ENSDARG00000000002	ENSDART00000000005	9	35060271	35084646	1	EU269066.1	2926	2604	RNASEQT00000016927	35059889	35086557	5219	2604	3175	RNASEQG00000016927	7	7	7	7	6	6	0	6	6	0	1228	2	2926	7	2604	7	7242	35084513	35084513	133	2044	unchanged
ENSDARG00000000018	ENSDART00000000019	4	14146902	14169064	-1	BC044537.1	2864	1545	RNASEQT00000020722	14146779	14169146	3039	1515	1695	RNASEQG00000020722	11	10	11	10	10	10	0	9	9	0	2843	3	2834	10	1515	9	14020	14148123	14148123	1221	1344	trim	973	0
ENSDARG00000000019	ENSDART00000000020	4	14076733	14125267	1	BC049139.1	2757	552	RNASEQT00000020721	14071579	14126169	6475	0	1788	No match	7	7	16	0	6	6	0	6	6	0	3738	1	2757	6	0	0	35798	14123181	14075630	2086	4687	trim	6	0
ENSDARG00000033231	ENSDART00000000042	2	50769977	50795751	-1	BC096872.1	2602	2475	RNASEQT00000004694	50703389	50795760	4735	2595	2657	RNASEQG00000004694	17	17	25	19	16	15	1	16	15	1	11523	1008	2495	16	2442	16	22336	50770051	50765384	74	2078	unchanged
ENSDARG00000000068	ENSDART00000000069	12	34979366	35032034	1	BC045377.1	2033	1155	RNASEQT00000013576	34979305	35032034	2094	1155	1354	RNASEQG00000013576	6	6	6	6	5	5	0	5	5	0	2731	0	2033	6	1155	6	14142	35031294	35031294	740	740	trim	124	0
ENSDARG00000000069	ENSDART00000000070	24	22679165	22711503	-1	BC049052.1	902	318	RNASEQT00000019723	22679169	22711600	995	318	538	RNASEQG00000019723	4	4	4	4	3	3	0	3	3	0	5263	0	898	4	318	4	20988	22679626	22679626	461	457	trim	387	0
ENSDARG00000000349	ENSDART00000000361	21	21943661	21947697	1	BC124708.1	1044	795	0	0	0	0	0	0	0	7	7	0	0	6	2	0	6	2	0	84	0	0	0	0	0	158	21947467	0	230	No match
ENSDARG00000000529	ENSDART00000000552	9	56719107	56746659	1	BC083518.1	2950	2709	RNASEQT00000017096	56724719	56747292	3165	2451	2474	RNASEQG00000017096	23	23	19	19	22	19	1	22	19	1	2998	218	2373	17	2295	17	5549	56746601	56746601	58	691	unchanged
ENSDARG00000000540	ENSDART00000000564	9	42156152	42161322	-1	BC051619.1	2142	1836	RNASEQT00000016520	42156152	42163260	2440	1743	2248	RNASEQG00000016520	4	3	7	4	3	2	1	2	1	1	952	346	2049	2	1743	2	13215	42156344	42156344	192	192	trim	1057	0
ENSDARG00000000651	ENSDART00000000693	9	42113376	42118915	1	BC109473.1	1346	1215	RNASEQT00000016518	42113299	42118914	1422	1215	1371	RNASEQG00000016518	7	7	7	7	6	6	0	6	6	0	152	0	1345	7	1215	7	486	42118863	42118863	52	51	trim	746	0
ENSDARG00000000656	ENSDART00000000698	19	7742970	7744898	1	BC078384.1	1088	657	RNASEQT00000024921	7742825	7744908	1243	657	1056	RNASEQG00000024921	6	6	6	6	5	5	0	5	5	0	2272	0	1088	6	657	6	5731	7744721	7744721	177	187	trim	110	0
ENSDARG00000000666	ENSDART00000000711	9	7269600	7280355	-1	BC085654.1	2320	822	RNASEQT00000016109	7269600	7280762	2727	840	1285	RNASEQG00000016110	4	4	4	4	3	3	0	3	3	0	928	0	2320	4	822	4	12865	7271042	7271042	1442	1442	extend	0	1290	1
ENSDARG00000000796	ENSDART00000000876	23	32389915	32396422	-1	BC074092.1	2920	1725	RNASEQT00000009778	32389915	32396517	3015	1725	1898	RNASEQG00000009778	7	6	7	6	6	6	0	5	5	0	2526	1	2920	7	1725	6	12636	32391032	32391032	1117	1117	trim	282	0
ENSDARG00000044279	ENSDART00000000877	6	41122322	41124276	1	BC075989.1	1396	1050	RNASEQT00000015063	41122292	41124282	1432	1050	1155	RNASEQG00000015063	5	5	5	5	4	4	0	4	4	0	418	0	1396	5	1050	5	1372	41124005	41124005	271	277	unchanged
ENSDARG00000000830	ENSDART00000000915	24	39302832	39326498	1	BC125895.1	2977	2469	RNASEQT00000019881	39302738	39326501	3074	2469	2889	RNASEQG00000019881	20	20	20	20	19	18	1	19	18	1	1641	1	2972	18	2464	18	3125	39326316	39326316	182	185	trim	284	0
ENSDARG00000000887	ENSDART00000000992	23	32339823	32346035	1	BC049064.1	988	549	RNASEQT00000009777	32339767	32346035	1044	549	736	RNASEQG00000009777	8	7	8	7	7	7	0	6	6	0	28249	3	988	8	549	7	42759	32345727	32345727	308	308	trim	106	0
ENSDARG00000000935	ENSDART00000001053	12	37187334	37231157	-1	BC047170.1	3249	2214	RNASEQT00000014033	37186602	37231158	3981	2334	2424	RNASEQG00000014033	15	15	15	15	14	13	0	14	13	0	1012	0	3248	14	2213	14	3665	37188280	37188159	946	1557	unchanged
ENSDARG00000074425	ENSDART00000001253	10	13199966	13203162	-1	BC096966.1	919	435	RNASEQT00000024103	13199892	13203324	1155	435	818	RNASEQG00000024103	4	4	4	4	3	3	0	3	3	0	1986	1	919	4	435	4	4327	13200229	13200229	263	337	trim	1856	0
ENSDARG00000001169	ENSDART00000001331	19	7796407	7802223	1	BC093373.1	916	771	RNASEQT00000025430	7795938	7805988	3326	771	1258	RNASEQG00000025430	9	9	11	9	8	8	0	8	8	0	1109	0	916	8	771	9	1318	7802096	7802096	127	2068	unchanged
ENSDARG00000031885	ENSDART00000001359	19	7737759	7741991	1	BC076475.1	872	654	RNASEQT00000025427	7737208	7742087	1519	786	1292	RNASEQG00000025427	6	6	6	6	5	5	0	5	5	0	2206	0	872	6	654	6	3236	7741860	7741860	131	227	unchanged
ENSDARG00000001210	ENSDART00000001376	7	33959195	33963931	-1	BC122201.1	911	675	RNASEQT00000007255	33959195	33964399	1080	675	924	RNASEQG00000007255	5	5	6	5	4	4	0	4	4	0	4518	0	843	4	675	5	9926	33959351	33959351	156	156	trim	116	0
ENSDARG00000001244	ENSDART00000001415	17	25267801	25281673	1	BC058068.1	3136	2691	RNASEQT00000001925	25267737	25282040	3574	2790	2878	RNASEQG00000001925	17	17	17	17	16	16	0	16	16	0	15991	7	3136	16	2691	16	64484	25281252	25281344	421	696	trim	1070	0
ENSDARG00000001313	ENSDART00000001444	17	28857836	28870757	-1	BC100036.1	3259	2121	RNASEQT00000001961	28857843	28870879	3374	2121	2516	RNASEQG00000001961	14	14	14	14	13	13	0	13	13	0	3718	2	3252	14	2121	14	16431	28858701	28858701	865	858	trim	12	0
ENSDARG00000001452	ENSDART00000001678	13	24895371	24903522	1	BC057428.1	3247	2532	RNASEQT00000011825	24892235	24912302	6027	2532	3339	RNASEQG00000011825	25	25	32	25	24	24	0	24	24	0	3959	0	3247	23	2532	25	5251	24902843	24902843	679	2688	unchanged
ENSDARG00000001463	ENSDART00000001691	17	25255797	25267007	1	BC142842.1	2448	1092	RNASEQT00000001924	25255703	25267007	2542	1092	1424	RNASEQG00000001924	9	8	9	8	8	8	0	7	7	0	692	0	2448	9	1092	8	4859	25265889	25265889	1118	1118	trim	9	0
ENSDARG00000001498	ENSDART00000001737	12	28728026	28777933	1	BC129161.1	2906	1134	RNASEQT00000013942	28730949	28776562	1254	888	964	RNASEQG00000013942	14	12	10	9	13	10	0	11	9	0	452	0	1252	8	888	8	7630	28775732	28775732	1601	290	unchanged
ENSDARG00000001549	ENSDART00000001795	9	2760906	2775794	1	BC139667.1	2868	2040	RNASEQT00000016056	2760221	2780797	7691	2076	2778	RNASEQG00000016057	7	7	9	8	6	6	0	6	6	0	434	0	2631	5	2040	6	5511	2775256	2775256	538	4913	extend	0	1370	0
ENSDARG00000001557	ENSDART00000001803	6	52177502	52185448	-1	BC049337.1	1748	918	RNASEQT00000015133	52170317	52185803	2474	918	1481	RNASEQG00000015133	8	7	9	7	7	7	0	6	6	0	2424	3	1689	7	918	7	7508	52178124	52178124	622	993	unchanged
ENSDARG00000001558	ENSDART00000001804	19	7613575	7622908	1	BC139579.1	2260	1857	RNASEQT00000024916	7613512	7622797	2212	1857	1995	RNASEQG00000024916	17	16	17	16	16	16	0	15	15	0	11201	4	2149	17	1857	16	23874	7622580	7622580	328	217	trim	599	0
ENSDARG00000045051	ENSDART00000001907	12	34845162	34852563	-1	BC154231.1	2092	558	RNASEQT00000013573	34845162	34854798	3304	1527	1904	RNASEQG00000013573	5	4	5	4	4	3	0	3	2	0	4325	0	2069	2	558	2	85875	34846648	34846562	1486	1400	trim	740	0
ENSDARG00000001656	ENSDART00000001930	19	7734316	7737711	-1	BC092899.1	1033	846	RNASEQT00000025426	7728316	7742087	6933	846	5247	RNASEQG00000025426	8	8	14	8	7	7	0	7	7	0	4017	0	1033	7	846	8	5825	7734478	7734478	162	1686	unchanged
ENSDARG00000001733	ENSDART00000002027	9	43680189	43723221	1	BC107973.1	1794	903	RNASEQT00000016533	43619698	43723229	1863	903	1129	RNASEQG00000016533	11	10	11	10	10	10	0	9	9	0	2782	0	1681	10	903	10	4813	43722495	43722495	726	734	trim	161	0
ENSDARG00000001734	ENSDART00000002029	22	21246198	21270826	-1	BC152650.1	2154	1221	RNASEQT00000001115	21246198	21270847	2175	1221	1345	RNASEQG00000001115	9	8	9	8	8	8	0	7	7	0	1838	0	2154	9	1221	8	7182	21247028	21247028	830	830	trim	144	0
ENSDARG00000008491	ENSDART00000002075	7	31515312	31525372	1	BC066739.1	1479	996	RNASEQT00000007225	31514806	31525372	1615	984	1132	RNASEQG00000007225	7	7	8	7	6	6	0	6	6	0	2264	0	1479	6	984	7	6785	31524889	31524889	483	483	trim	1563	0
ENSDARG00000016854	ENSDART00000002078	12	15799603	15802414	-1	AF115774.1	1548	1092	RNASEQT00000013829	15799491	15802622	1868	1092	1431	RNASEQG00000013829	2	1	2	1	1	1	0	0	0	0	16	0	1548	2	1092	1	1012	15799928	15799928	325	437	unchanged
ENSDARG00000012697	ENSDART00000002085	14	18964878	18968540	1	BC129149.1	1799	1122	RNASEQT00000018150	18964769	18968543	1911	1122	1401	RNASEQG00000018150	2	2	2	2	1	1	0	1	1	0	56	0	1799	2	1122	2	554	18968033	18968033	507	510	trim	2381	0
ENSDARG00000011326	ENSDART00000002094	2	35448866	35452606	1	BC095811.1	848	675	RNASEQT00000004486	35448877	35452697	754	501	523	RNASEQG00000004486	5	5	5	5	4	4	0	4	4	0	65	0	663	4	501	4	185	35452466	35452466	140	231	unchanged
ENSDARG00000018956	ENSDART00000002095	13	33492275	33504911	1	BC045334.1	1840	1476	RNASEQT00000011427	33492216	33504914	1902	1476	1764	RNASEQG00000011427	9	8	9	8	8	8	0	7	7	0	1785	0	1840	9	1476	8	4850	33504776	33504776	135	138	trim	7	0
ENSDARG00000009215	ENSDART00000002128	21	25153596	25154663	-1	BC093308.1	1068	633	0	0	0	0	0	0	0	1	1	0	0	0	0	0	0	0	0	0	0	0	0	0	0	915	25154010	0	414	No match
ENSDARG00000008433	ENSDART00000002164	8	11477298	11502758	1	AF330001.1	3817	2805	RNASEQT00000023541	11477296	11502093	3154	2805	2916	RNASEQG00000023541	20	20	20	20	19	19	0	19	19	0	3636	3	3152	20	2805	20	7983	11501855	11501855	903	238	unchanged
ENSDARG00000017234	ENSDART00000002184	10	43827702	43828984	1	BC163705.1	1283	1122	RNASEQT00000024786	43788321	43828937	1510	1182	1478	RNASEQG00000024786	1	1	2	1	0	0	0	0	0	0	0	0	1230	0	1122	1	154	43828905	43828905	79	32	unchanged
ENSDARG00000006074	ENSDART00000002186	8	21652356	21669235	1	BC054665.1	1932	786	0	0	0	0	0	0	0	7	7	0	0	6	6	0	6	6	0	5182	0	0	0	0	0	21854	21668127	0	1108	No match
ENSDARG00000006869	ENSDART00000002215	16	29611956	29633696	1	BC085390.1	1569	876	RNASEQT00000012375	29611913	29635181	3070	879	1097	RNASEQG00000012375	8	7	8	7	7	7	0	6	6	0	491	0	1542	7	876	7	1559	29633208	29633208	488	1973	trim	1	0
ENSDARG00000027620	ENSDART00000002221	5	27765942	27775083	1	BC135024.1	2147	1650	RNASEQT00000006535	27765770	27775134	2370	1650	1865	RNASEQG00000006535	12	12	12	12	11	11	0	11	11	0	725	0	2147	12	1650	12	1488	27774629	27774629	454	505	unchanged
ENSDARG00000015831	ENSDART00000002225	3	50310991	50323852	-1	BC077119.1	1593	1008	RNASEQT00000022090	50310988	50324009	1753	1008	1452	RNASEQG00000022090	3	3	3	3	2	2	0	2	2	0	641	0	1593	3	1008	3	4847	50311289	50311289	298	301	trim	1015	0
ENSDARG00000019588	ENSDART00000002241	2	53035303	53084360	-1	BC097097.1	1260	600	RNASEQT00000004726	53035018	53084640	1822	597	1173	RNASEQG00000004726	8	7	8	7	7	7	0	6	6	0	944	0	1257	7	597	6	2954	53035667	53035667	364	649	unchanged
ENSDARG00000090722	ENSDART00000002242	20	1422022	1429612	1	BC097023.1	1229	1095	RNASEQT00000015224	1421996	1444313	1245	1095	1142	RNASEQG00000015224	6	6	6	6	5	5	0	5	5	0	145	0	325	1	304	1	1594	1429499	1444210	113	103	trim	10	0
ENSDARG00000012025	ENSDART00000002250	14	31951896	31957709	-1	BC065683.1	2321	1407	RNASEQT00000018266	31951747	31957789	2550	1407	1749	RNASEQG00000018266	2	2	2	2	1	1	0	1	1	0	283	0	2321	2	1407	2	22621	31952548	31952548	652	801	trim	7	0
ENSDARG00000007425	ENSDART00000002281	2	37674121	37677483	1	BC115193.1	1731	981	RNASEQT00000003989	37670600	37677483	2374	1398	1625	RNASEQG00000003989	4	4	11	10	3	3	0	3	3	0	265	0	1731	3	981	3	1726	37676734	37676734	749	749	trim	10	0
ENSDARG00000017121	ENSDART00000002309	23	3420382	3423555	-1	BC117640.1	3174	1071	0	0	0	0	0	0	0	1	1	0	0	0	0	0	0	0	0	0	0	0	0	0	0	12690	3422313	0	1931	No match
ENSDARG00000016783	ENSDART00000002318	11	1487470	1496136	1	BC086820.1	2433	1068	RNASEQT00000000025	1363762	1496136	3629	1068	2292	RNASEQG00000000025	6	6	8	6	5	5	0	5	5	0	4257	1	2433	5	1068	6	53797	1494799	1494799	1337	1337	trim	234	0
ENSDARG00000020057	ENSDART00000002334	9	13235992	13387395	1	DQ002899.1	4030	3216	RNASEQT00000016732	13235938	13388207	4896	3216	4065	RNASEQG00000016732	13	13	13	13	12	11	0	12	11	0	618	1	4028	11	3214	11	4588	13387376	13387376	19	831	unchanged
ENSDARG00000015955	ENSDART00000002341	21	25134337	25136177	-1	AF359432.1	1841	657	0	0	0	0	0	0	0	1	1	0	0	0	0	0	0	0	0	0	0	0	0	0	0	3486	25135206	0	869	No match
ENSDARG00000008306	ENSDART00000002348	22	10223023	10232030	-1	BC097151.1	1582	987	RNASEQT00000001398	10222887	10232881	1790	981	1210	RNASEQG00000001398	6	5	6	5	5	3	1	4	3	1	538	3	1474	4	981	4	2163	10223467	10223467	444	580	unchanged
ENSDARG00000009342	ENSDART00000002394	24	8054767	8070773	-1	BC057499.1	3022	984	RNASEQT00000019599	8054761	8071001	2974	1212	1350	RNASEQG00000019599	10	9	11	10	9	9	0	8	8	0	9059	14	2740	9	984	8	56376	8056667	8056667	1900	1624	trim	627	0
ENSDARG00000018264	ENSDART00000002398	23	17625411	17640831	-1	BC078201.1	1785	1290	RNASEQT00000010050	17625284	17640879	1960	1290	1483	RNASEQG00000010050	9	9	9	9	8	8	0	8	8	0	1742	0	1785	9	1290	9	4215	17625761	17625761	350	477	unchanged
ENSDARG00000006889	ENSDART00000002449	7	17114214	17225368	1	BC093219.1	1284	885	RNASEQT00000007795	17111725	17226544	4949	885	3712	RNASEQG00000007795	7	6	7	6	6	6	0	5	5	0	2030	0	1284	7	885	6	5470	17225307	17225307	61	1237	unchanged
ENSDARG00000010752	ENSDART00000002453	5	25187336	25242829	-1	BC091952.1	3299	2073	RNASEQT00000005802	25187336	25266893	6949	2016	5723	RNASEQG00000005802	15	15	30	14	14	14	0	14	14	0	4383	0	3245	14	2016	13	15351	25188562	25188562	1226	1226	trim	432	0
ENSDARG00000008890	ENSDART00000002459	11	6316209	6328264	1	BC095197.1	1541	1155	RNASEQT00000000097	6316122	6328212	1576	1155	1400	RNASEQG00000000097	10	10	10	10	9	9	0	9	9	0	868	0	1489	10	1155	10	1221	6328036	6328036	228	176	trim	1305	0
ENSDARG00000008765	ENSDART00000002463	20	14704244	14720732	1	BC054575.1	1359	678	RNASEQT00000015305	14703922	14720736	1685	678	1019	RNASEQG00000015305	4	4	4	4	3	3	0	3	3	0	3093	6	1359	4	678	4	21778	14720070	14720070	662	666	trim	209	0
ENSDARG00000018022	ENSDART00000002465	12	26412454	26434837	-1	BC044370.1	3046	2811	RNASEQT00000013477	26348061	26434845	8644	2811	2859	RNASEQG00000013477	16	16	37	16	15	15	0	15	15	0	4893	1	3046	15	2811	16	13045	26412649	26412649	195	5785	trim	350	0
ENSDARG00000018989	ENSDART00000002469	14	24591953	24612390	1	BC065970.1	2972	2523	RNASEQT00000018191	24591899	24612390	3026	2523	2722	RNASEQG00000018191	19	19	19	19	18	18	0	18	18	0	17144	10	2972	19	2523	19	29387	24612086	24612086	304	304	trim	159	0
ENSDARG00000018569	ENSDART00000002493	16	19123792	19134140	-1	BC068424.1	2508	1170	RNASEQT00000012252	19123780	19134199	2579	1170	1411	RNASEQG00000012252	10	9	10	9	9	9	0	8	8	0	2331	0	2508	10	1170	9	7151	19124948	19124948	1156	1168	trim	220	0
ENSDARG00000008852	ENSDART00000002498	7	16671553	16799176	-1	BC093280.1	1532	1194	RNASEQT00000007043	16671553	16799196	1552	1194	1243	RNASEQG00000007043	10	10	10	10	9	9	0	9	9	0	1105	0	1532	10	1194	10	2194	16671862	16671862	309	309	trim	48	0
ENSDARG00000008310	ENSDART00000002501	6	42340666	42349575	-1	BC059642.1	2309	1392	RNASEQT00000014585	42340497	42350016	2919	1392	2202	RNASEQG00000014585	5	5	5	5	4	4	0	4	4	0	3252	4	2309	5	1392	5	32630	42341214	42341214	548	717	trim	298	0
ENSDARG00000014545	ENSDART00000002510	2	36422155	36442122	1	BC091983.1	2488	1437	RNASEQT00000003971	36422058	36452794	3901	1437	1780	RNASEQG00000003971	13	13	20	13	12	12	0	12	12	0	817	0	2488	12	1437	13	1506	36441317	36441317	805	2121	trim	471	0
ENSDARG00000020840	ENSDART00000002545	11	3347866	3361858	-1	BC065654.1	2219	1419	RNASEQT00000000063	3348147	3362114	2194	1419	1815	RNASEQG00000000063	15	14	15	14	14	14	0	13	13	0	5589	1	1938	15	1419	14	9255	3348526	3348526	660	379	trim	363	0
ENSDARG00000007597	ENSDART00000002547	19	26165195	26179429	-1	BC078382.1	1424	711	RNASEQT00000025098	26165200	26179493	1483	711	800	RNASEQG00000025098	5	5	5	5	4	4	0	4	4	0	979	0	1419	5	711	5	4560	26165883	26165883	688	683	trim	440	0
ENSDARG00000004697	ENSDART00000002554	20	33899863	33944626	1	BC075918.1	1818	1359	RNASEQT00000015487	33899799	33944626	1882	1359	1479	RNASEQG00000015487	10	10	10	10	9	9	0	9	9	0	598	0	1818	10	1359	10	1643	33944223	33944223	403	403	trim	6	0
ENSDARG00000007130	ENSDART00000002556	11	42951291	42959301	-1	BC092913.1	1063	729	RNASEQT00000000382	42951293	42959334	1094	729	815	RNASEQG00000000382	8	8	8	8	7	7	0	7	7	0	3697	1	1061	8	729	8	9175	42951572	42951572	281	279	trim	5686	0
ENSDARG00000015747	ENSDART00000002583	12	6732854	6746807	-1	BC077118.1	1569	1239	RNASEQT00000013324	6730025	6746826	1841	1239	1321	RNASEQG00000013324	12	12	13	12	11	10	1	11	10	1	1014	79	1311	11	1239	12	1638	6733121	6733121	267	520	trim	151	0
ENSDARG00000010516	ENSDART00000002595	24	22229649	22233468	1	BC071354.1	565	483	RNASEQT00000019715	22228926	22233470	1290	483	1257	RNASEQG00000019715	6	5	6	5	5	5	0	4	4	0	132997	14	565	6	483	5	85685	22233437	22233437	31	33	trim	260	0
ENSDARG00000014817	ENSDART00000002624	5	20790451	20798303	-1	BC067558.1	2419	636	RNASEQT00000005739	20747982	20798407	9910	0	7490	No match	6	6	29	0	5	5	0	5	5	0	18027	4	2419	5	0	0	69560	20792180	20750402	1729	2420	trim	97	0
ENSDARG00000018383	ENSDART00000002633	9	45899600	45904789	1	BC162950.1	1067	948	RNASEQT00000016547	45898845	45906530	2286	948	1771	RNASEQG00000016547	7	7	8	7	6	6	0	6	6	0	1664	0	1067	6	948	7	2439	45904738	45904738	51	515	trim	39	0
ENSDARG00000007264	ENSDART00000002637	15	454591	464297	1	BC081660.1	1368	861	RNASEQT00000017123	454471	541027	1873	861	997	RNASEQG00000017123	10	10	11	10	9	9	0	9	9	0	11975	3	1294	9	861	10	24896	463806	463806	491	876	extend	0	405	0
ENSDARG00000016608	ENSDART00000002644	12	5669611	5701659	1	BC083487.1	1391	1008	RNASEQT00000013305	5669414	5701661	1590	1020	1226	RNASEQG00000013305	14	14	14	14	13	12	1	13	12	1	1789	167	1391	14	1008	14	1397	5701297	5701297	362	364	trim	20	0
ENSDARG00000020785	ENSDART00000002661	20	239656	280735	1	AY862414.1	6221	5616	RNASEQT00000015202	239447	280734	6429	5616	6136	RNASEQG00000015202	40	40	40	40	39	39	0	39	39	0	7125	2	6220	40	5616	40	12299	280441	280441	294	293	trim	70	0
ENSDARG00000017931	ENSDART00000002684	14	32436381	32478032	1	BC054905.1	3158	2679	RNASEQT00000018693	32436359	32481026	6174	2679	2880	RNASEQG00000018693	18	18	18	18	17	17	0	17	17	0	957	1	3158	18	2679	18	2912	32477732	32477732	300	3294	unchanged
ENSDARG00000008407	ENSDART00000002691	22	11550856	11603337	-1	BC081682.1	2841	750	RNASEQT00000001020	11550856	11603436	2940	750	858	RNASEQG00000001020	8	7	8	7	7	7	0	6	6	0	4935	2	2841	8	750	7	24659	11557062	11557062	2082	2082	trim	5	0
ENSDARG00000010137	ENSDART00000002698	13	28958753	28969353	1	BC097093.1	2983	1080	RNASEQT00000011360	28924756	28969353	2870	1059	1277	RNASEQG00000011360	11	11	14	11	10	9	0	10	9	0	5173	90	2624	9	1031	10	35087	28967591	28967591	1762	1593	trim	1006	0
ENSDARG00000011049	ENSDART00000002714	23	17693667	17719862	1	BC075944.1	2327	1398	RNASEQT00000009604	17693454	17721364	4042	1398	1851	RNASEQG00000009604	13	13	13	13	12	12	0	12	12	0	2485	0	2327	13	1398	13	7229	17719173	17719173	689	2191	trim	77	0
ENSDARG00000016177	ENSDART00000002728	6	40853536	40878529	1	BC090823.1	3486	2244	RNASEQT00000014565	40852130	40878533	4985	2835	4086	RNASEQG00000014565	16	15	20	18	15	14	1	14	13	1	8932	613	3284	15	2244	15	36565	40877634	40877634	895	899	trim	884	0
ENSDARG00000011184	ENSDART00000002730	5	63250685	63286398	1	BC093257.1	2386	1680	RNASEQT00000006830	63250538	63286527	2662	1680	1951	RNASEQG00000006830	8	7	8	7	7	7	0	6	6	0	719	0	2386	8	1680	7	3538	63285816	63285816	582	711	unchanged
ENSDARG00000015576	ENSDART00000002741	13	25627326	25632277	-1	BC092976.1	1965	1620	RNASEQT00000011831	25625561	25632653	4106	1620	2160	RNASEQG00000011831	2	1	2	1	1	1	0	0	0	0	231	0	1965	2	1620	1	11254	25627507	25627507	181	1946	unchanged
ENSDARG00000005454	ENSDART00000002750	13	36282176	36293842	-1	AY170618.1	3210	2829	RNASEQT00000011452	36282176	36293853	3221	2829	3134	RNASEQG00000011452	17	15	17	15	16	16	0	14	14	0	23163	38	3210	17	2829	15	43505	36282263	36282263	87	87	trim	130	0
ENSDARG00000008359	ENSDART00000002763	24	31349999	31374445	1	BC053309.1	1961	990	RNASEQT00000019806	31349930	31374452	2037	990	1190	RNASEQG00000019806	7	7	7	7	6	6	0	6	6	0	5365	3	1961	7	990	7	24617	31373605	31373605	840	847	trim	1114	0
ENSDARG00000003749	ENSDART00000002764	8	2631961	2644825	1	AY648826.1	1566	1020	RNASEQT00000022926	2631762	2644825	1765	1020	1315	RNASEQG00000022926	14	14	14	14	13	13	0	13	13	0	5042	0	1566	14	1020	14	6889	2644375	2644375	450	450	trim	144	0
ENSDARG00000017549	ENSDART00000002783	4	7007617	7015474	1	BC092793.1	1910	1008	0	0	0	0	0	0	0	9	9	0	0	8	2	1	8	2	1	121	67	0	0	0	0	2931	7014642	0	832	No match
ENSDARG00000017658	ENSDART00000002826	22	42130804	42142161	1	BC078357.1	1804	1083	RNASEQT00000001238	42130510	42141818	1755	1083	1554	RNASEQG00000001238	10	9	10	9	9	9	0	8	8	0	4797	0	1461	10	1083	9	12380	42141617	42141617	544	201	trim	815	0
ENSDARG00000014858	ENSDART00000002856	16	57790203	57818030	1	AY333791.1	1327	1314	RNASEQT00000013213	57775063	57790514	445	342	443	RNASEQG00000013213	7	7	2	2	6	0	0	6	0	0	0	0	310	0	303	0	73	57818024	57790512	6	2	unchanged
ENSDARG00000016951	ENSDART00000002863	13	25985169	25986014	1	BC162120.1	846	627	0	0	0	0	0	0	0	1	1	0	0	0	0	0	0	0	0	0	0	0	0	0	0	49	25985941	0	73	No match
ENSDARG00000016695	ENSDART00000002866	5	33079755	33107600	-1	BC162955.1	1308	1197	RNASEQT00000006581	33078680	33108041	2824	1197	1705	RNASEQG00000006581	13	13	13	13	12	12	0	12	12	0	568	0	1308	13	1197	13	612	33079799	33079799	44	1119	unchanged
ENSDARG00000019746	ENSDART00000002867	12	3646187	3669142	-1	AF510993.1	3774	1089	RNASEQT00000013278	3650739	3669188	3805	1089	1633	RNASEQG00000013278	10	8	9	8	9	8	0	7	7	0	1113	0	3410	8	1089	8	8903	3652911	3652911	2187	2172	extend	0	1249	17
ENSDARG00000006392	ENSDART00000002886	1	17825396	17834050	1	BC083243.1	1393	1182	RNASEQT00000008438	17825342	17834041	1438	1182	1343	RNASEQG00000008438	12	12	12	12	11	11	0	11	11	0	3908	1	1384	12	1182	12	4353	17833946	17833946	104	95	trim	158	0
ENSDARG00000010619	ENSDART00000002928	20	1446499	1462565	-1	BC134836.1	2457	2127	RNASEQT00000015712	1446496	1462582	2477	2028	2144	RNASEQG00000015712	6	6	6	6	5	5	0	5	5	0	220	0	2457	6	2028	6	1795	1446829	1446829	330	333	unchanged
ENSDARG00000008803	ENSDART00000002932	17	15376803	15379435	1	BC092814.1	1851	699	RNASEQT00000001818	15376543	15379439	1743	678	1133	RNASEQG00000001818	2	2	4	4	1	1	0	1	1	0	4241	30	1479	1	642	1	221016	15378463	15378829	972	610	trim	896	0
ENSDARG00000008592	ENSDART00000002938	5	23811716	23836180	-1	BC053411.1	2326	1899	RNASEQT00000005773	23810923	23836228	3167	1899	2093	RNASEQG00000005773	14	14	14	14	13	13	0	13	13	0	2903	0	2326	14	1899	14	6642	23811997	23811997	281	1074	trim	164	0
ENSDARG00000090912	ENSDART00000002945	17	43066449	43067255	-1	BC162195.1	516	450	RNASEQT00000002551	43066323	43076746	817	450	658	RNASEQG00000002551	4	4	5	4	3	3	0	3	3	0	378	0	120	1	87	1	997	43066482	43066482	33	159	unchanged
ENSDARG00000008278	ENSDART00000002961	7	26146926	26161593	-1	BC065331.1	2792	1611	RNASEQT00000007920	26146611	26163186	3551	1611	2348	RNASEQG00000007920	13	12	14	12	12	12	0	11	11	0	4127	0	2685	12	1611	12	17954	26147814	26147814	888	1203	unchanged
ENSDARG00000009868	ENSDART00000002992	24	12867253	12885574	-1	BC099999.1	2030	1626	RNASEQT00000019639	12866570	12888500	3337	1626	2451	RNASEQG00000019639	15	14	16	14	14	13	1	13	12	1	4157	208	2030	14	1626	14	7273	12867456	12867456	203	886	trim	118	0
ENSDARG00000006316	ENSDART00000003001	21	25465387	25468120	1	AY561517.1	530	468	RNASEQT00000002928	25465058	25468125	864	468	820	RNASEQG00000002928	5	5	5	5	4	4	0	4	4	0	161979	10	530	5	468	5	131489	25468081	25468081	39	44	trim	449	0
ENSDARG00000027419	ENSDART00000003008	6	3642810	3676988	1	BC047851.1	3221	1764	RNASEQT00000014230	3642495	3676988	3536	1764	2240	RNASEQG00000014230	17	16	17	16	16	16	0	15	15	0	6981	0	3221	17	1764	16	16395	3675692	3675692	1296	1296	trim	2	0
ENSDARG00000013856	ENSDART00000003035	2	15433369	15447551	1	BC062867.1	1579	1539	RNASEQT00000004340	15433304	15447792	1885	1539	1610	RNASEQG00000004340	10	10	10	10	9	9	0	9	9	0	1826	0	1579	10	1539	10	9718	15447517	15447517	34	275	unchanged
ENSDARG00000003523	ENSDART00000003040	14	14032974	14041248	1	EU583681.1	1165	945	RNASEQT00000018125	14032968	14041248	1171	945	1025	RNASEQG00000018125	7	7	7	7	6	6	0	6	6	0	98	0	1165	7	945	7	259	14041102	14041102	146	146	trim	96	0
ENSDARG00000020708	ENSDART00000003042	25	8135594	8144257	1	BC059575.1	1020	444	RNASEQT00000010815	8135525	8314040	895	444	582	RNASEQG00000010815	4	3	5	3	3	2	1	2	2	0	2672	768	792	3	444	3	22478	8143750	8143750	507	313	unchanged
ENSDARG00000016056	ENSDART00000003130	8	47110756	47116918	-1	BC093422.1	1756	1005	RNASEQT00000023858	47110389	47116981	2186	1080	1265	RNASEQG00000023858	7	6	7	7	6	6	0	5	5	0	495	0	1756	7	1005	5	1599	47111310	47111310	554	921	unchanged
ENSDARG00000021399	ENSDART00000003133	3	34259302	34265744	-1	BC078353.1	1604	915	RNASEQT00000021952	34259240	34268228	3981	915	3509	RNASEQG00000021952	9	8	10	8	8	8	0	7	7	0	3549	0	1435	8	915	8	4621	34259712	34259712	410	472	trim	3441	0
ENSDARG00000018742	ENSDART00000003143	12	25551415	25562994	1	BC091938.1	2163	858	RNASEQT00000013927	25501381	25568451	7712	5484	5847	RNASEQG00000013927	7	6	48	45	6	6	0	5	5	0	2509	0	1474	5	858	5	16491	25556363	25556363	1301	1865	unchanged
ENSDARG00000005926	ENSDART00000003167	19	36967047	36977233	-1	BC053160.1	1433	726	RNASEQT00000025654	36966916	36977347	1204	708	880	RNASEQG00000025654	6	6	7	7	5	5	0	5	5	0	9909	3	959	5	700	5	18711	36967696	36967240	649	324	unchanged
ENSDARG00000005034	ENSDART00000003192	15	33791311	33864960	-1	BC127405.1	1702	1389	RNASEQT00000017415	33791312	33854906	1980	1347	1693	RNASEQG00000017415	11	11	10	10	10	9	0	10	9	0	896	0	1554	9	1267	9	2123	33791599	33791599	288	287	trim	6	0
ENSDARG00000010317	ENSDART00000003193	9	32138702	32141593	-1	BC142876.1	1443	1107	RNASEQT00000016900	32138579	32141609	1582	1107	1262	RNASEQG00000016900	2	1	2	1	1	1	0	0	0	0	205	0	1443	2	1107	1	1038	32138899	32138899	197	320	unchanged
ENSDARG00000007418	ENSDART00000003195	24	10842346	10848533	-1	BC092770.1	1109	720	RNASEQT00000019622	10831714	10848701	6454	720	2992	No match	5	5	7	5	4	4	0	4	4	0	1664	1	1109	4	720	5	4413	10842647	10835176	301	3462	extend	0	3320	1
ENSDARG00000020237	ENSDART00000003210	18	31115167	31116199	-1	BC162848.1	1033	972	0	0	0	0	0	0	0	1	1	0	0	0	0	0	0	0	0	0	0	0	0	0	0	181	31115194	0	27	No match
ENSDARG00000014324	ENSDART00000003211	11	38804752	38816740	1	BC091828.1	2033	891	RNASEQT00000000356	38804674	38816739	2110	891	1108	RNASEQG00000000356	10	7	10	7	9	9	0	6	6	0	3981	0	2032	10	891	7	15488	38814979	38814979	1003	1002	trim	8	0
ENSDARG00000008948	ENSDART00000003242	10	3527758	3540499	1	BC108011.1	2315	1587	RNASEQT00000024449	3536229	3540446	1001	264	382	RNASEQG00000024449	7	7	3	2	6	2	0	6	2	0	9	0	1001	2	264	1	85	3539827	3539827	672	619	unchanged
ENSDARG00000016636	ENSDART00000003246	17	10456744	10510720	-1	BC097063.1	2955	2298	RNASEQT00000001770	10455952	10510749	5567	2298	2452	RNASEQG00000001770	21	19	20	19	20	19	0	18	18	0	4340	1	2955	19	2298	19	9489	10459067	10459067	532	3115	extend	0	2748	1
ENSDARG00000001953	ENSDART00000003247	4	24560164	24572537	-1	BC060925.1	3263	1611	RNASEQT00000020815	24560157	24572591	3250	1584	1828	RNASEQG00000020815	17	17	15	15	16	16	0	16	16	0	2562	0	3189	15	1537	15	8291	24561626	24561579	1462	1422	trim	58	0
ENSDARG00000005619	ENSDART00000003248	20	13797939	13808696	1	BC048055.1	1971	1323	RNASEQT00000015807	13797571	13808372	2015	1323	1825	RNASEQG00000015807	10	9	10	9	9	9	0	8	8	0	5795	0	1647	10	1323	9	20282	13808182	13808182	514	190	unchanged
ENSDARG00000016415	ENSDART00000003252	25	8295386	8318613	-1	BC086742.1	3497	2778	RNASEQT00000010449	8295055	8318661	3876	2778	2920	RNASEQG00000010449	17	17	17	17	16	15	1	16	15	1	3747	242	3497	17	2778	17	11445	8296011	8296011	625	956	trim	299	0
ENSDARG00000016710	ENSDART00000003273	5	9540985	9554968	1	BC078283.1	911	795	RNASEQT00000005689	9540737	9554965	1156	795	1052	RNASEQG00000005689	8	8	8	8	7	5	0	7	5	0	1705	0	908	8	795	8	2835	9554861	9554861	107	104	trim	110	0
ENSDARG00000025094	ENSDART00000003298	6	42864174	42880572	-1	BC045461.1	3334	1572	RNASEQT00000015077	42864010	42880797	3725	1887	2174	RNASEQG00000015077	13	11	12	12	12	11	0	10	9	0	6914	1	3334	11	1572	8	34096	42867699	42865561	1700	1551	unchanged
ENSDARG00000025174	ENSDART00000003299	21	19224766	19230428	1	BC083399.1	1280	1044	RNASEQT00000003355	19224717	19231233	2134	1044	1234	RNASEQG00000003355	8	8	8	8	7	7	0	7	7	0	6690	0	1280	8	1044	8	15193	19230333	19230333	95	900	unchanged
ENSDARG00000019438	ENSDART00000003303	22	38017439	38060701	1	BC044449.1	1968	1134	RNASEQT00000001202	38017347	38063314	3657	1134	1373	RNASEQG00000001202	10	9	11	9	9	9	0	8	8	0	1954	0	1626	9	1134	9	5723	38060014	38060014	687	2284	extend	0	885	0
ENSDARG00000008540	ENSDART00000003310	9	55102198	55103535	1	BC095366.1	1338	738	0	0	0	0	0	0	0	1	1	0	0	0	0	0	0	0	0	0	0	0	0	0	0	1630	55103198	0	337	No match
ENSDARG00000016304	ENSDART00000003317	1	101973	116398	1	BC059610.1	1641	1158	RNASEQT00000008289	101867	132832	5640	0	2852	No match	12	11	19	0	11	10	0	10	9	0	4218	0	1333	10	0	0	7376	116080	129142	318	2788	extend	0	1897	0
ENSDARG00000030250	ENSDART00000003325	22	815916	837074	1	BC085532.1	1797	1467	RNASEQT00000001269	815864	838898	2372	1668	1792	RNASEQG00000001269	13	13	14	14	12	12	0	12	12	0	2914	0	1530	12	1458	12	5421	836816	838318	258	580	unchanged
ENSDARG00000002754	ENSDART00000003346	25	31432251	31444637	1	BC046049.1	1167	1074	RNASEQT00000011026	31431907	31444773	1647	1074	1479	RNASEQG00000011026	6	6	6	6	5	5	0	5	5	0	775	0	1167	6	1074	6	2146	31444605	31444605	32	168	unchanged
ENSDARG00000006235	ENSDART00000003418	17	12616992	12627772	-1	BC097187.1	2045	972	0	0	0	0	0	0	0	10	10	0	0	9	8	1	9	8	1	3873	288	0	0	0	0	11091	12617694	0	702	No match
ENSDARG00000001912	ENSDART00000003420	4	18884899	18961989	-1	BC108054.1	1715	1257	RNASEQT00000021150	18884410	18916351	2408	1257	1851	RNASEQG00000021150	7	4	6	4	6	6	0	3	3	0	60	0	1522	5	1257	4	467	18884967	18884967	68	557	unchanged
ENSDARG00000006275	ENSDART00000003425	11	45568995	45572256	1	BC054562.1	2109	1506	0	0	0	0	0	0	0	2	2	0	0	1	0	0	1	0	0	0	0	0	0	0	0	14087	45571826	0	430	No match
ENSDARG00000009806	ENSDART00000003435	10	41257450	41269140	1	BC059540.1	1124	600	RNASEQT00000024327	41257356	41269140	1218	780	853	RNASEQG00000024327	7	7	7	7	6	6	0	6	6	0	3281	0	1124	7	600	7	6305	41268775	41268775	365	365	trim	220	0
ENSDARG00000006982	ENSDART00000003441	21	40051375	40054278	1	BC109396.1	1456	681	RNASEQT00000003089	40051501	40054309	1361	726	792	RNASEQG00000003089	2	2	2	2	1	1	0	1	1	0	121	3	1330	2	681	2	2323	40053740	40053740	538	569	trim	236	0
ENSDARG00000009081	ENSDART00000003444	5	67633531	67667565	-1	BC049321.1	2536	1908	RNASEQT00000006205	67633531	67663737	3049	1890	2638	RNASEQG00000006205	11	11	11	10	10	9	0	10	9	0	440	0	2314	10	1890	9	1411	67633942	67633942	411	411	trim	218	0
ENSDARG00000075827	ENSDART00000003463	1	23260	30081	1	AF515269.1	1694	1332	RNASEQT00000008285	23198	58985	1758	1332	1400	RNASEQG00000008285	8	8	8	8	7	7	0	7	7	0	161	0	727	7	721	7	640	29725	58627	356	358	trim	61	0
ENSDARG00000020191	ENSDART00000003475	11	31129422	31156412	1	BC159114.1	3256	2157	RNASEQT00000000714	31128297	31169348	6395	0	5992	No match	19	16	29	0	18	17	0	15	15	0	272	0	2564	16	0	0	1010	31155570	31168945	805	403	unchanged
ENSDARG00000014348	ENSDART00000003482	9	25226386	25234489	1	BC056298.1	1573	1065	RNASEQT00000016829	25225644	25237116	4942	1065	1821	RNASEQG00000016829	7	7	7	7	6	6	0	6	6	0	1702	1	1573	7	1065	7	8336	25233995	25233995	494	3121	unchanged
ENSDARG00000001621	ENSDART00000003493	8	25874675	25887354	-1	BC100119.1	1751	1011	RNASEQT00000023162	25867123	25887432	1944	978	1154	RNASEQG00000023162	8	7	9	8	7	7	0	6	6	0	2039	0	1010	7	912	6	5331	25875317	25867913	642	790	trim	161	0
ENSDARG00000016263	ENSDART00000003497	1	44995771	45021903	1	AY871210.1	4055	2235	RNASEQT00000008649	44978845	45021910	5742	2283	4365	RNASEQG00000008649	11	11	12	11	10	10	0	10	10	0	1854	0	4055	9	2235	10	16054	45020533	45020533	1370	1377	trim	114	0
ENSDARG00000008480	ENSDART00000003517	13	15656044	15680279	1	BC075759.1	1872	918	RNASEQT00000011753	15655881	15704143	1297	948	1232	RNASEQG00000011753	4	3	5	4	3	3	0	2	2	0	1288	0	1029	3	908	2	9018	15679446	15704078	833	65	unchanged
ENSDARG00000010047	ENSDART00000003518	21	20748581	20751159	1	BC096984.1	1454	1131	0	0	0	0	0	0	0	3	2	0	0	2	2	0	1	1	0	930	0	0	0	0	0	7757	20751003	0	156	No match
ENSDARG00000024112	ENSDART00000003543	9	10995669	11004165	1	BC074036.1	1843	1269	RNASEQT00000016172	10995499	11004165	2013	1269	1576	RNASEQG00000016173	12	12	12	12	11	11	0	11	11	0	2649	0	1843	12	1269	12	4443	11003728	11003728	437	437	trim	328	0
ENSDARG00000004580	ENSDART00000003550	2	35747136	35761614	-1	BC059430.1	1602	915	RNASEQT00000003966	35747136	35761670	1658	915	1058	RNASEQG00000003966	11	11	11	11	10	10	0	10	10	0	1669	0	1602	11	915	11	3752	35747736	35747736	600	600	trim	314	0
ENSDARG00000017213	ENSDART00000003552	16	35310291	35318472	1	BC074028.1	2235	1257	RNASEQT00000012456	35310069	35318472	2457	1257	1595	RNASEQG00000012456	2	1	2	1	1	1	0	0	0	0	160	0	2235	2	1257	1	10049	35317610	35317610	862	862	trim	293	0
ENSDARG00000008720	ENSDART00000003583	4	11680593	11743813	1	BC095186.1	1832	438	RNASEQT00000020689	11681111	11743813	2509	504	1335	RNASEQG00000020689	4	3	4	4	3	3	0	2	2	0	456	0	1620	3	438	2	5443	11742639	11742639	1174	1174	trim	366	0
ENSDARG00000014358	ENSDART00000003646	11	24140273	24153746	-1	BC078270.1	1422	969	RNASEQT00000000219	24137937	24153709	3721	969	1028	RNASEQG00000000219	7	7	7	7	6	6	0	6	6	0	141	0	1385	7	969	7	339	24140630	24140630	357	2693	extend	0	2408	276
ENSDARG00000011079	ENSDART00000003648	9	21887253	21905908	1	BC057490.1	3042	2817	RNASEQT00000016269	21887079	21905908	3144	2817	3017	RNASEQG00000016269	27	26	28	26	26	26	0	25	25	0	10967	6	3042	26	2817	26	11421	21905781	21905781	127	127	trim	163	0
ENSDARG00000038694	ENSDART00000003670	2	36810198	36819611	-1	BC090826.1	1093	555	RNASEQT00000004522	36803769	36819670	1198	555	844	RNASEQG00000004522	5	5	6	5	4	4	0	4	4	0	6414	13	792	4	555	5	24128	36810506	36810506	308	354	unchanged
ENSDARG00000035891	ENSDART00000003690	7	50239674	50244367	1	BC091887.1	1720	513	RNASEQT00000007398	50218715	50287105	9656	4644	4941	RNASEQG00000007398	5	5	38	18	4	4	0	4	4	0	275	0	1407	3	513	4	2161	50243160	50243160	1207	4715	trim	339	0
ENSDARG00000017841	ENSDART00000003694	4	12476554	12489792	1	BC047184.1	4645	3693	RNASEQT00000021069	12476455	12492364	4913	3693	4012	RNASEQG00000021069	15	15	17	15	14	13	1	14	13	1	8497	867	4645	14	3693	15	38830	12489060	12489060	732	901	unchanged
ENSDARG00000009160	ENSDART00000003706	13	42925502	42959184	-1	BC115227.1	1973	1425	RNASEQT00000011974	42925630	42948109	1580	1158	1181	RNASEQG00000011974	15	15	12	12	14	13	0	14	13	0	876	0	1578	11	1158	11	1624	42926029	42926029	527	399	unchanged
ENSDARG00000016918	ENSDART00000003712	11	30857134	30871798	-1	BC085667.1	2856	2358	RNASEQT00000000293	30857135	30871878	2901	2424	2517	RNASEQG00000000293	18	18	18	18	17	16	0	17	16	0	5267	3	2821	16	2324	16	17329	30857619	30857519	485	384	trim	2479	0
ENSDARG00000021370	ENSDART00000003715	25	20075391	20084135	-1	BC045961.1	1697	1191	RNASEQT00000010928	20075243	20084163	1873	1191	1361	RNASEQG00000010928	11	11	11	11	10	10	0	10	10	0	2447	0	1697	11	1191	11	4010	20075755	20075755	364	512	unchanged
ENSDARG00000055644	ENSDART00000003716	6	39029287	39036344	1	BC090827.1	1564	987	RNASEQT00000015024	39029196	39036753	2043	966	1131	RNASEQG00000015024	8	8	7	7	7	5	0	7	5	0	229	0	1543	7	966	7	1077	39035841	39035841	503	912	unchanged
ENSDARG00000010008	ENSDART00000003745	24	33381675	33398129	1	BC053115.1	1789	1368	RNASEQT00000019817	33381455	33398135	2015	1368	1632	RNASEQG00000019817	9	9	9	9	8	8	0	8	8	0	4347	0	1789	9	1368	9	11425	33397752	33397752	377	383	trim	21	0
ENSDARG00000018281	ENSDART00000003748	18	6176863	6183340	-1	BC092905.1	1197	906	RNASEQT00000005294	6175785	6183321	2256	906	1030	RNASEQG00000005294	7	7	7	7	6	6	0	6	6	0	220	0	1178	7	906	7	502	6177011	6177011	148	1226	unchanged
ENSDARG00000016173	ENSDART00000003752	16	32712341	32724769	-1	AF506209.1	1977	1632	RNASEQT00000012416	32712338	32724931	2065	1632	1838	RNASEQG00000012416	14	14	15	14	13	13	0	13	13	0	27244	8	1900	13	1632	14	51557	32712642	32712642	301	227	trim	1120	0
ENSDARG00000018285	ENSDART00000003789	24	38814917	38839187	-1	BC065959.1	3099	1614	RNASEQT00000019870	38814917	38839299	3211	1614	1784	RNASEQG00000019870	14	14	14	14	13	13	0	13	13	0	7775	20	3099	14	1614	14	35946	38816344	38816344	1427	1427	trim	94	0
ENSDARG00000015921	ENSDART00000003790	4	1687687	1699824	-1	BC049457.1	1947	1473	RNASEQT00000020574	1687685	1699846	1971	1473	1598	RNASEQG00000020574	15	15	15	15	14	14	0	14	14	0	4044	1	1947	15	1473	15	6381	1688058	1688058	371	373	trim	324	0
ENSDARG00000009793	ENSDART00000003801	2	23298624	23304670	1	BC045849.1	2396	1770	RNASEQT00000003832	23298515	23306018	4138	2055	2408	RNASEQG00000003832	4	4	3	3	3	2	0	3	2	0	275	0	2396	2	1770	2	10126	23304288	23304288	382	1730	trim	52	0
ENSDARG00000018997	ENSDART00000003825	1	11559452	11574952	-1	BC076010.1	1523	402	RNASEQT00000008393	11559354	11575266	1935	402	989	RNASEQG00000008393	4	3	4	3	3	3	0	2	2	0	2366	1	1523	4	402	3	16012	11560300	11560300	848	946	trim	20	0
ENSDARG00000019233	ENSDART00000003839	10	15437172	15476153	1	BC083527.1	2175	1983	RNASEQT00000024117	15437075	15476159	2368	2073	2261	RNASEQG00000024117	14	14	14	14	13	12	0	13	12	0	2486	2	2175	12	1983	12	5277	15476052	15476052	101	107	trim	106	0
ENSDARG00000002589	ENSDART00000003847	12	15888143	15890500	1	BC081501.1	737	513	RNASEQT00000013397	15887967	15890506	919	513	744	RNASEQG00000013397	6	6	6	6	5	5	0	5	5	0	79063	7	737	6	513	6	60935	15890331	15890331	169	175	trim	331	0
ENSDARG00000009982	ENSDART00000003879	14	10542634	10570267	-1	BC079509.1	1546	1125	RNASEQT00000018568	10542583	10570328	1658	1125	1320	RNASEQG00000018568	7	6	7	6	6	6	0	5	5	0	704	0	1546	7	1125	6	3827	10542921	10542921	287	338	unchanged
ENSDARG00000007271	ENSDART00000003884	24	27125411	27139503	1	BC045441.1	2585	2427	RNASEQT00000019768	27125336	27139503	2640	2508	2609	No match	9	7	10	7	8	8	0	6	6	0	2341	0	2520	7	2427	6	14558	27139472	27139472	31	31	trim	223	0
ENSDARG00000003827	ENSDART00000003888	13	37983791	37997886	-1	BC048040.1	2014	1053	RNASEQT00000011480	37984342	37997904	1481	1053	1210	RNASEQG00000011480	10	10	10	10	9	9	0	9	9	0	2006	0	1463	10	1053	10	2789	37984613	37984613	822	271	trim	110	0
ENSDARG00000070787	ENSDART00000003891	11	11840965	11902606	1	BC058305.1	3256	2190	RNASEQT00000000133	11840864	11902606	3357	2190	2440	RNASEQG00000000133	16	14	16	14	15	15	0	13	13	0	31904	4	3256	16	2190	14	95659	11898963	11898963	917	917	trim	327	0
ENSDARG00000016994	ENSDART00000003895	1	45166453	45185843	1	BC077083.1	1679	1593	RNASEQT00000008654	45166254	45195021	4412	2112	2381	RNASEQG00000008654	14	13	18	17	13	12	0	12	11	0	1350	0	1660	10	1590	10	1682	45185843	45192990	0	2031	extend	0	1593	0
ENSDARG00000003991	ENSDART00000003898	6	14971227	15001305	-1	BC083393.1	2137	840	RNASEQT00000014869	14976191	15001394	1304	840	1014	RNASEQG00000014869	7	5	6	5	6	4	1	4	4	0	136	52	1215	5	840	5	1239	14976481	14976481	1212	290	unchanged
ENSDARG00000067828	ENSDART00000003907	18	31329152	31363276	1	BC154039.1	1851	1602	0	0	0	0	0	0	0	6	5	0	0	5	0	0	4	0	0	0	0	0	0	0	0	16	31363276	0	0	No match
ENSDARG00000021991	ENSDART00000003922	13	24927384	24941278	-1	BC091924.1	1970	1029	RNASEQT00000011318	24925655	24941314	3735	1029	1171	RNASEQG00000011318	12	11	12	11	11	11	0	10	10	0	11536	0	1970	12	1029	11	26087	24928219	24928219	835	2564	trim	10	0
ENSDARG00000018524	ENSDART00000003929	22	18950892	18970595	-1	BC066456.1	2919	1530	0	0	0	0	0	0	0	7	7	0	0	6	6	0	6	6	0	2935	2	0	0	0	0	25938	18951987	0	1095	No match
ENSDARG00000002564	ENSDART00000003939	3	21464694	21493434	-1	BC083255.1	1360	672	RNASEQT00000021771	21461595	21493686	4711	672	1177	RNASEQG00000021771	4	4	4	4	3	3	0	3	3	0	1659	0	1360	4	672	4	4009	21465129	21465129	435	3534	extend	0	1813	1
ENSDARG00000020261	ENSDART00000003940	2	21618308	21644308	-1	BC044459.1	2045	639	RNASEQT00000003808	21619106	21644660	1599	639	1076	RNASEQG00000003808	8	8	8	8	7	7	0	7	7	0	16336	3	1247	8	639	8	56358	21619629	21619629	1321	523	trim	921	0
ENSDARG00000019033	ENSDART00000003946	2	26760752	26768973	-1	BC155834.1	1446	993	RNASEQT00000003873	26760746	26769107	1586	993	1134	RNASEQG00000003873	8	8	8	8	7	7	0	7	7	0	4694	0	1446	8	993	8	13454	26761198	26761198	446	452	trim	176	0
ENSDARG00000026476	ENSDART00000003957	5	26179555	26186635	-1	BC066734.1	2696	1029	RNASEQT00000005826	26179555	26186747	1681	1029	1261	RNASEQG00000005826	11	11	12	11	10	10	0	10	10	0	21186	11	1569	10	1029	11	140447	26181102	26181102	1547	420	trim	202	0
ENSDARG00000016143	ENSDART00000003960	14	29493295	29503450	1	BC133126.1	2105	1251	RNASEQT00000018237	29484670	29503541	2678	1218	2130	RNASEQG00000018237	6	6	10	5	5	4	1	5	4	1	3480	377	1694	5	1218	4	16194	29502993	29502993	457	548	trim	50	0
ENSDARG00000012932	ENSDART00000003978	21	30832589	30849340	-1	BC091455.1	1255	972	RNASEQT00000003000	30832589	30849390	1305	972	1069	RNASEQG00000003000	7	7	7	7	6	6	0	6	6	0	2255	0	1255	7	972	7	5567	30832825	30832825	236	236	trim	596	0
ENSDARG00000002394	ENSDART00000003987	10	26361141	26363478	1	GU299164.1	1817	1599	RNASEQT00000024644	26361102	26363878	2256	1599	1661	RNASEQG00000024644	2	1	2	1	1	1	0	0	0	0	15	0	1817	2	1599	1	861	26363283	26363283	195	595	unchanged
ENSDARG00000079938	ENSDART00000003994	3	32276514	32278057	1	BC152596.1	816	528	0	0	0	0	0	0	0	4	4	0	0	3	1	1	3	1	1	65	3	0	0	0	0	5435	32277897	0	160	No match
ENSDARG00000020465	ENSDART00000003998	5	26542496	26551292	-1	BC044518.1	2076	1737	RNASEQT00000005829	26542496	26552907	3694	1785	3393	RNASEQG00000005829	16	16	16	16	15	15	0	15	15	0	52031	80	2076	15	1737	15	69918	26542797	26542797	301	301	trim	368	0
ENSDARG00000070529	ENSDART00000004002	25	26240290	26242796	-1	BC110089.1	1200	558	RNASEQT00000010976	26110710	26242520	733	0	528	No match	6	6	5	0	5	0	0	5	0	0	0	0	88	0	0	0	114	26240844	26110915	554	205	unchanged
ENSDARG00000020529	ENSDART00000004031	16	22255583	22282108	1	BC066580.1	2445	1707	RNASEQT00000012851	22255532	22283587	3975	1707	1804	RNASEQG00000012851	17	17	17	17	16	16	0	16	16	0	1966	0	2445	17	1707	17	4920	22281416	22281416	692	2171	unchanged
ENSDARG00000018397	ENSDART00000004034	19	33998698	34086386	-1	BC059489.1	2357	582	RNASEQT00000025179	33998698	34017221	2213	582	665	RNASEQG00000025179	5	4	4	4	4	4	0	3	3	0	2246	17	2181	3	582	4	14956	34000246	34000246	1548	1548	trim	165	0
ENSDARG00000079934	ENSDART00000004041	8	38171902	38217309	-1	BC134921.1	3867	2559	RNASEQT00000023272	38171902	38217433	3991	2559	2856	RNASEQG00000023272	10	9	10	9	9	9	0	8	8	0	2087	1	3867	10	2559	9	15448	38173037	38173037	1135	1135	trim	15	0
ENSDARG00000007727	ENSDART00000004052	16	48428502	48462565	-1	BC162718.1	2280	2169	RNASEQT00000013113	48428156	48481331	2885	2235	2465	RNASEQG00000013113	19	19	20	19	18	18	0	18	18	0	1180	1	2147	18	2073	18	1855	48428576	48428576	74	420	unchanged
ENSDARG00000011272	ENSDART00000004075	6	40504229	40507970	1	BC059579.1	708	390	RNASEQT00000014553	40494636	40507970	3529	0	1841	No match	4	4	15	0	3	3	0	3	3	0	1862	1	708	3	0	0	4182	40507683	40503248	287	1688	trim	171	0
ENSDARG00000013659	ENSDART00000004092	20	52039490	52066686	-1	BC085420.1	2013	1236	RNASEQT00000016317	52039321	52066751	2247	1236	1402	RNASEQG00000016316	14	12	14	12	13	13	0	11	11	0	2382	0	2013	14	1236	12	4511	52042218	52042218	676	845	unchanged
ENSDARG00000010281	ENSDART00000004108	9	22340245	22391185	1	BC048882.1	4526	3459	0	0	0	0	0	0	0	23	23	0	0	22	21	0	22	21	0	6257	2	0	0	0	0	22741	22390152	0	1033	No match
ENSDARG00000020611	ENSDART00000004129	18	35122766	35139864	1	BC116487.1	1721	1197	RNASEQT00000005105	35122715	35140187	2095	1179	1269	RNASEQG00000005105	8	8	8	8	7	7	0	7	7	0	1769	0	1721	8	1179	8	5769	35139361	35139361	503	826	trim	105	0
ENSDARG00000017047	ENSDART00000004181	10	10704776	10748685	1	BC093216.1	2439	1932	RNASEQT00000024083	10704720	10754482	8292	1932	2279	RNASEQG00000024083	13	12	13	12	12	11	1	11	10	1	768	38	2439	13	1932	12	3206	10748469	10748469	216	6013	extend	0	1284	89
ENSDARG00000010610	ENSDART00000004200	15	27538436	27548646	-1	BC163770.1	2542	2142	RNASEQT00000017352	27537235	27548933	4030	2142	2734	RNASEQG00000017352	8	8	8	8	7	6	1	7	6	1	399	97	2542	8	2142	8	1610	27538531	27538531	95	1296	trim	912	0
ENSDARG00000035598	ENSDART00000004217	5	22102872	22200147	1	BC045340.1	2135	1425	RNASEQT00000005755	22102849	22203183	5194	1425	1575	RNASEQG00000005755	11	10	11	10	10	10	0	9	9	0	8411	3	2135	11	1425	10	23969	22199564	22199564	583	3619	extend	0	2037	0
ENSDARG00000045628	ENSDART00000004220	15	14478991	14488057	-1	BC083224.1	1528	783	RNASEQT00000017225	14478991	14488174	1642	780	1064	RNASEQG00000017225	11	10	11	10	10	10	0	9	9	0	2111	0	1525	10	780	9	5625	14479569	14479569	578	578	trim	1637	0
ENSDARG00000005525	ENSDART00000004233	1	52985148	52992606	-1	BC075914.1	1267	945	RNASEQT00000009292	52978008	53000039	2842	1857	2153	RNASEQG00000009292	8	6	16	15	7	7	0	5	5	0	1423	0	1003	5	945	5	4102	52985187	52985187	39	689	unchanged
ENSDARG00000019230	ENSDART00000004238	5	34902043	34905473	-1	BC071352.1	852	801	RNASEQT00000005940	34902043	34905904	1283	801	1251	RNASEQG00000005940	8	8	8	8	7	7	0	7	7	0	186103	8	852	8	801	8	189964	34902075	34902075	32	32	trim	2469	0
ENSDARG00000070713	ENSDART00000004240	6	39016833	39022193	1	BC133900.1	1572	1164	RNASEQT00000015023	39017977	39022194	1489	621	1117	RNASEQG00000015023	8	8	6	4	7	5	0	7	5	0	335	0	1465	5	621	3	1401	39021822	39021822	371	372	unchanged
ENSDARG00000088788	ENSDART00000004273	3	4626879	4835585	1	BC124255.1	985	882	RNASEQT00000022299	4674064	4685571	3444	3210	3398	RNASEQG00000022299	4	3	4	3	3	1	0	2	0	0	6	0	6	0	6	0	191	4835585	4685525	0	46	unchanged
ENSDARG00000036279	ENSDART00000004277	2	35601433	35699928	1	AF468048.1	6050	4782	RNASEQT00000003964	35601424	35700787	6842	4782	5160	RNASEQG00000003964	28	28	29	28	27	27	0	27	27	0	13767	3	6050	27	4782	28	45004	35699029	35699029	899	1682	trim	9	0
ENSDARG00000003027	ENSDART00000004284	16	31931896	31936189	-1	BC110091.1	1320	750	RNASEQT00000012411	31931907	31936223	1343	750	864	RNASEQG00000012411	8	8	8	8	7	7	0	7	7	0	1148	0	1309	8	750	8	2768	31932386	31932386	490	479	trim	583	0
ENSDARG00000009196	ENSDART00000004286	5	40687821	40696079	1	BC081392.1	1321	1023	RNASEQT00000006010	40687788	40696078	1353	1023	1153	RNASEQG00000006010	14	13	14	13	13	13	0	12	12	0	7253	0	1320	14	1023	13	4245	40695878	40695878	201	200	trim	443	0
ENSDARG00000007444	ENSDART00000004288	8	12159602	12198592	1	AY618922.1	2986	2028	RNASEQT00000023550	12159587	12198683	3092	2028	2316	RNASEQG00000023550	18	18	18	18	17	17	0	17	17	0	974	0	2986	18	2028	18	1623	12197907	12197907	685	776	unchanged
ENSDARG00000017657	ENSDART00000004295	6	40805070	40806112	1	BC093235.1	1043	780	0	0	0	0	0	0	0	1	1	0	0	0	0	0	0	0	0	0	0	0	0	0	0	495	40805996	0	116	No match
ENSDARG00000009477	ENSDART00000004331	22	182819	203358	-1	BC067676.1	1981	1269	RNASEQT00000001252	183134	203686	1994	1269	1621	RNASEQG00000001252	10	10	10	10	9	9	0	9	9	0	285	0	1666	10	1269	10	1271	183507	183507	688	373	unchanged
ENSDARG00000020077	ENSDART00000004379	17	52208739	52247111	1	BC047174.1	3001	2169	RNASEQT00000002123	52208744	52247111	2856	2169	2311	RNASEQG00000002123	21	21	22	21	20	20	0	20	20	0	5626	1	2856	20	2169	21	11860	52246426	52246426	685	545	trim	282	0
ENSDARG00000018918	ENSDART00000004390	5	27833550	27844054	-1	BC076494.1	2507	1998	RNASEQT00000005850	27833550	27847890	3053	2001	2684	RNASEQG00000005850	17	16	18	16	16	16	0	15	15	0	2305	1	2507	16	1998	16	4103	27833919	27833919	369	369	trim	13	0
ENSDARG00000005023	ENSDART00000004392	19	44193949	44210168	-1	BC078307.1	2131	1695	RNASEQT00000025691	44193880	44210562	2594	1695	2244	RNASEQG00000025691	10	10	10	10	9	9	0	9	9	0	4590	17	2131	10	1695	10	10518	44194230	44194230	281	350	unchanged
ENSDARG00000016699	ENSDART00000004407	2	29831318	29850278	-1	AY677196.1	4245	3348	RNASEQT00000004442	29832078	29850112	3590	2715	3484	RNASEQG00000004442	28	27	26	23	27	26	0	26	26	0	340	1	3455	24	2715	22	4468	29832184	29832184	866	106	unchanged
ENSDARG00000019144	ENSDART00000004420	13	24519788	24535407	-1	BC056535.1	1574	642	RNASEQT00000011311	24519800	24535571	1726	642	819	RNASEQG00000011311	8	7	8	7	7	7	0	6	6	0	729	0	1562	8	642	7	2331	24527449	24527449	919	907	trim	172	0
ENSDARG00000007955	ENSDART00000004423	11	1302660	1357500	-1	BC056826.1	3947	3813	RNASEQT00000000023	1302665	1357518	3962	3180	3243	RNASEQG00000000023	35	34	34	29	34	32	1	33	31	1	10225	441	3942	33	3178	27	12793	1302749	1306782	89	719	trim	617	0
ENSDARG00000003968	ENSDART00000004483	11	6528904	6535134	-1	BC134173.1	1640	1416	RNASEQT00000000516	6528902	6535656	2164	1416	1992	RNASEQG00000000516	4	3	4	3	3	3	0	2	2	0	2168	0	1640	4	1416	3	15395	6529074	6529074	170	172	unchanged
ENSDARG00000037203	ENSDART00000004498	9	733625	741273	1	AF527627.1	1019	666	0	0	0	0	0	0	0	6	5	0	0	5	5	0	4	4	0	433	0	0	0	0	0	1510	740999	0	274	No match
ENSDARG00000016153	ENSDART00000004504	22	36015344	36073172	1	AF483476.1	3594	2601	RNASEQT00000001193	36015203	36078398	8961	2601	3118	RNASEQG00000001193	3	2	3	2	2	2	0	1	1	0	1031	1	3594	3	2601	2	46322	36072555	36072555	617	5843	extend	0	3440	383
ENSDARG00000026941	ENSDART00000004505	16	34880692	34897257	-1	BC085657.1	3115	1824	RNASEQT00000012450	34880689	34897361	3222	1851	2142	RNASEQG00000012450	8	7	8	7	7	7	0	6	6	0	367	1	3115	8	1824	7	3609	34881769	34881769	1077	1080	trim	33	0
ENSDARG00000033056	ENSDART00000004518	15	30579782	30585522	-1	BC150404.1	1363	633	0	0	0	0	0	0	0	6	6	0	0	5	2	0	5	2	0	15	0	0	0	0	0	98	30580402	0	620	No match
ENSDARG00000012848	ENSDART00000004521	8	26887566	26910343	1	BC053248.1	2393	1479	RNASEQT00000023187	26887402	26910341	2555	1479	1959	RNASEQG00000023187	15	14	15	14	14	14	0	13	13	0	9203	1	2391	15	1479	14	21156	26909745	26909745	598	596	trim	1346	0
ENSDARG00000019188	ENSDART00000004539	10	3159049	3164918	1	BC071403.1	1127	465	RNASEQT00000024009	3158814	3164911	1355	519	709	RNASEQG00000024009	4	4	4	4	3	3	0	3	3	0	5021	1	1120	4	465	4	18201	3164265	3164265	653	646	trim	709	0
ENSDARG00000002597	ENSDART00000004546	8	47170985	47188777	-1	BC044513.1	2238	1863	RNASEQT00000023860	47170895	47188837	2296	1863	2019	RNASEQG00000023860	15	14	16	14	14	14	0	13	13	0	12581	529	2146	14	1863	14	21782	47171264	47171264	279	277	unchanged
ENSDARG00000019013	ENSDART00000004548	21	15990279	15994007	-1	AY596176.1	1103	972	RNASEQT00000002837	15989219	15994671	2827	972	1732	RNASEQG00000002837	3	3	3	3	2	2	0	2	2	0	148	0	1103	3	972	3	809	15990314	15990314	35	1095	trim	751	0
ENSDARG00000055349	ENSDART00000004553	10	32032875	32188055	-1	BC117639.1	2557	1425	RNASEQT00000024247	32032877	32232898	2633	1425	1586	RNASEQG00000024247	11	10	12	10	10	10	0	9	9	0	666	0	2555	10	1425	10	3143	32033924	32033924	1049	1047	trim	155	0
ENSDARG00000021048	ENSDART00000004585	19	1979658	1994590	-1	BC075876.1	2091	1617	RNASEQT00000024854	1979656	1994844	2347	1617	1942	RNASEQG00000024854	17	17	17	17	16	16	0	16	16	0	5045	0	2091	17	1617	17	6993	1980061	1980061	403	405	trim	7	0
ENSDARG00000008329	ENSDART00000004588	8	7536907	7591621	1	BC162330.1	2011	1506	RNASEQT00000022964	7536760	7596237	6774	1506	1749	RNASEQG00000022964	11	10	11	10	10	10	0	9	9	0	401	0	2011	11	1506	10	1177	7591212	7591212	409	5025	extend	0	4316	64
ENSDARG00000006397	ENSDART00000004601	20	43807556	43818223	-1	BC058878.1	1845	717	RNASEQT00000015585	43807556	43818276	1898	717	847	RNASEQG00000015585	7	7	7	7	6	6	0	6	6	0	9650	1	1845	7	717	7	31961	43808607	43808607	1051	1051	trim	232	0
ENSDARG00000018574	ENSDART00000004622	19	8046904	8053390	1	BC067655.1	1366	1203	RNASEQT00000024928	8046639	8053390	1631	1203	1486	RNASEQG00000024928	5	5	5	5	4	4	0	4	4	0	5280	0	1366	5	1203	5	30139	8053245	8053245	145	145	trim	144	0
ENSDARG00000019706	ENSDART00000004625	20	23411328	23413853	-1	BC092681.1	1193	990	RNASEQT00000015375	23411328	23414224	1564	990	1375	RNASEQG00000015375	4	4	4	4	3	3	0	3	3	0	6336	1	1193	4	990	4	30925	23411517	23411517	189	189	trim	343	0
ENSDARG00000019951	ENSDART00000004626	2	36966226	36985060	1	BC097135.1	1318	1185	RNASEQT00000004526	36966130	36998747	3056	1185	1340	RNASEQG00000004526	8	8	9	8	7	7	0	7	7	0	4758	2	1318	7	1185	8	16184	36984986	36984986	74	1716	unchanged
ENSDARG00000002872	ENSDART00000004627	3	53285167	53299219	-1	FJ868973.1	2457	2124	RNASEQT00000022103	53285165	53299281	2521	2127	2316	RNASEQG00000022103	9	8	9	8	8	8	0	7	7	0	2223	0	2457	9	2124	8	3027	53285486	53285486	203	205	trim	67	0
ENSDARG00000009134	ENSDART00000004652	20	52535164	52538934	-1	BC066687.1	1473	984	RNASEQT00000015641	52535164	52539012	1551	1071	1248	RNASEQG00000015641	4	4	4	4	3	3	0	3	3	0	202	0	1473	4	984	4	1484	52535467	52535467	303	303	trim	78	0
ENSDARG00000017659	ENSDART00000004655	23	18731587	18739223	-1	BC081590.1	3409	1035	RNASEQT00000009611	18731587	18743551	5351	1035	3384	RNASEQG00000009611	8	7	13	7	7	7	0	6	6	0	4191	0	3409	7	1035	7	53332	18733554	18733554	1967	1967	trim	733	0
ENSDARG00000020187	ENSDART00000004656	6	13904103	13921129	-1	BC082795.1	1102	618	RNASEQT00000014337	13904197	13933025	974	618	683	RNASEQG00000014337	8	8	9	8	7	7	0	7	7	0	8829	0	922	7	618	8	10112	13904488	13904488	385	291	trim	106	0
ENSDARG00000009978	ENSDART00000004679	16	25670478	25671843	1	AY233453.1	410	288	0	0	0	0	0	0	0	3	3	0	0	2	2	0	2	2	0	74928	8	0	0	0	0	231135	25671781	0	62	No match
ENSDARG00000011998	ENSDART00000004712	2	32479008	32486759	-1	BC086849.1	1663	1317	RNASEQT00000003944	32479010	32487101	1855	1326	1764	RNASEQG00000003944	7	7	8	8	6	6	0	6	6	0	7013	1	1513	6	1282	6	13143	32479258	32479101	250	91	trim	1688	0
ENSDARG00000019763	ENSDART00000004716	6	9435295	9440948	1	BC055256.1	1665	1020	RNASEQT00000014282	9435122	9440547	1437	1020	1239	RNASEQG00000014282	6	5	6	5	5	5	0	4	4	0	12584	0	1264	6	1020	5	48750	9440349	9440349	599	198	trim	1492	0
ENSDARG00000020123	ENSDART00000004721	20	38482817	38543394	1	BC076083.1	2074	1143	RNASEQT00000015542	38482778	38543394	2830	1860	2010	RNASEQG00000015542	11	10	15	14	10	9	0	9	8	0	6479	0	2074	9	1143	8	15059	38542574	38542574	820	820	trim	499	0
ENSDARG00000007080	ENSDART00000004727	6	36160310	36170249	1	BC153321.1	1944	1416	RNASEQT00000015002	36160258	36171032	2779	1416	1535	RNASEQG00000015002	11	11	11	11	10	10	0	10	10	0	899	1	1944	11	1416	11	1805	36169788	36169788	461	1244	unchanged
ENSDARG00000019547	ENSDART00000004735	9	267616	337946	1	BC067671.1	1613	1500	RNASEQT00000016020	267471	337950	1762	1503	1666	RNASEQG00000016020	17	16	17	16	16	16	0	15	15	0	3401	0	1613	17	1500	16	3111	337854	337854	92	96	trim	109	0
ENSDARG00000019717	ENSDART00000004751	16	51950122	51977030	1	BC162623.1	3429	1212	RNASEQT00000012599	51950017	51977259	3351	1263	1457	RNASEQG00000012599	8	8	10	9	7	7	0	7	7	0	2923	45	2966	7	1212	8	18931	51974902	51974902	2128	1894	trim	81	0
ENSDARG00000009214	ENSDART00000004769	12	35390901	35409751	1	BC086719.1	2433	1515	RNASEQT00000013582	35390699	35411358	4161	1515	1752	RNASEQG00000013582	9	8	9	8	8	8	0	7	7	0	2080	0	2405	8	1515	8	11167	35408949	35408949	802	2409	trim	479	0
ENSDARG00000021110	ENSDART00000004771	25	18854269	18922771	-1	BC055275.1	2449	1473	RNASEQT00000010913	18854165	18922984	2766	1473	1808	RNASEQG00000010913	12	12	12	12	11	11	0	11	11	0	1164	0	2449	12	1473	12	3348	18855123	18855123	854	958	unchanged
ENSDARG00000001897	ENSDART00000004780	11	32083217	32101129	-1	BC091843.1	3294	2949	RNASEQT00000000308	32083190	32101182	3380	2955	3019	RNASEQG00000000308	22	22	22	22	21	19	1	21	19	1	8165	571	3294	21	2949	21	16030	32083551	32083551	334	361	trim	453	0
ENSDARG00000011190	ENSDART00000004803	10	43979278	44026670	1	EU919571.1	2217	2217	RNASEQT00000024349	43954516	44029851	5072	2217	2730	RNASEQG00000024349	16	16	18	16	15	15	0	15	15	0	1292	6	2217	14	2217	16	2512	44026670	44026670	0	2342	trim	103	0
ENSDARG00000021147	ENSDART00000004811	17	26770026	26777020	-1	BC075945.1	2723	1149	RNASEQT00000001940	26770111	26777092	2710	1164	1367	RNASEQG00000001940	11	11	11	11	10	10	0	10	10	0	2236	1	2638	11	1149	11	8436	26771454	26771454	1428	1343	trim	170	0
ENSDARG00000005218	ENSDART00000004848	2	394830	410278	-1	BC067729.1	2248	1641	RNASEQT00000003609	394836	410729	2693	1641	2178	RNASEQG00000003609	7	7	7	7	6	6	0	6	6	0	306	0	2242	7	1641	7	2549	395351	395351	521	515	trim	11	0
ENSDARG00000006174	ENSDART00000004871	23	20416434	20422532	-1	BC083278.1	1527	981	RNASEQT00000009637	20416434	20422544	1539	981	1279	RNASEQG00000009637	7	7	7	7	6	6	0	6	6	0	165	0	1527	7	981	7	375	20416694	20416694	260	260	trim	1	0
ENSDARG00000012140	ENSDART00000004899	2	36385008	36394766	-1	BC045378.1	1951	1497	RNASEQT00000003970	36385011	36395086	2268	1497	1892	RNASEQG00000003970	11	11	11	11	10	10	0	10	10	0	9300	0	1948	11	1497	11	25680	36385387	36385387	379	376	trim	134	0
ENSDARG00000012369	ENSDART00000004903	2	29897501	29901132	1	BC054596.1	1540	1011	RNASEQT00000003900	29896359	29901137	2687	1011	2277	RNASEQG00000003900	6	6	6	6	5	5	0	5	5	0	7125	0	1540	6	1011	6	32303	29900727	29900727	405	410	trim	529	0
ENSDARG00000016086	ENSDART00000004923	3	40684997	40763310	-1	BC059201.1	4386	2196	RNASEQT00000022031	40684997	40763568	4538	2196	2625	RNASEQG00000022031	18	18	19	18	17	17	0	17	17	0	9045	0	4280	17	2196	18	17773	40687016	40687016	2019	1913	trim	6	0
ENSDARG00000019516	ENSDART00000004937	6	58565704	58572868	1	AY380818.1	1421	1311	RNASEQT00000014721	58525472	58576800	5628	1323	1586	RNASEQG00000014721	2	2	4	3	1	1	0	1	1	0	21	0	1412	1	1302	1	884	58572758	58572758	110	4042	trim	1	0
ENSDARG00000006145	ENSDART00000004959	25	13634227	13647900	1	BC055677.1	2072	1692	RNASEQT00000010863	13634126	13648280	2553	1692	1990	RNASEQG00000010863	6	5	6	5	5	5	0	4	4	0	1773	0	2072	6	1692	5	9420	13647717	13647717	183	563	unchanged
ENSDARG00000010250	ENSDART00000004964	7	57966582	57985581	1	BC065622.1	1432	828	RNASEQT00000007467	57966450	57985581	1564	828	1159	RNASEQG00000007467	7	6	7	6	6	6	0	5	5	0	7154	0	1432	7	828	6	18895	57985176	57985176	405	405	trim	20	0
ENSDARG00000052721	ENSDART00000005004	13	23712187	23836259	-1	AY398398.1	1732	1527	RNASEQT00000011807	23712135	23836281	1806	1527	1605	RNASEQG00000011807	14	13	14	13	13	13	0	12	12	0	4049	45	1732	14	1527	13	4575	23712336	23712336	149	201	unchanged
ENSDARG00000006019	ENSDART00000005021	23	20401930	20414762	-1	AY300010.1	2637	1878	RNASEQT00000009636	20401930	20415122	2997	1878	2366	RNASEQG00000009636	14	14	14	14	13	13	0	13	13	0	24682	3	2637	14	1878	14	79495	20402561	20402561	631	631	trim	382	0
ENSDARG00000008811	ENSDART00000005033	7	45596294	45609228	1	BC153438.1	1582	513	0	0	0	0	0	0	0	5	5	0	0	4	4	0	4	4	0	330	0	0	0	0	0	1343	45608293	0	935	No match
ENSDARG00000020788	ENSDART00000005072	23	14920216	14937440	-1	BC155558.1	1402	795	RNASEQT00000010038	14920107	14942691	1908	795	1422	RNASEQG00000010038	8	7	9	7	7	7	0	6	6	0	453	0	1402	7	795	7	1673	14920593	14920593	377	486	unchanged
ENSDARG00000019856	ENSDART00000005086	9	36954516	36975119	1	BC085663.1	3354	3078	RNASEQT00000016482	36954406	36975121	3466	3078	3267	RNASEQG00000016482	22	22	22	22	21	21	0	21	21	0	18805	2	3354	22	3078	22	25519	36974922	36974922	197	199	trim	1647	0
ENSDARG00000002165	ENSDART00000005105	24	12849988	12858612	1	BC075864.1	1086	747	RNASEQT00000019638	12823585	12858612	3159	747	2984	RNASEQG00000019638	11	11	13	11	10	10	0	10	10	0	7414	0	1046	10	747	11	7054	12858437	12858437	175	175	trim	10	0
ENSDARG00000071083	ENSDART00000005112	22	31296432	31334323	-1	BC152605.1	1364	882	RNASEQT00000001604	31324989	31334463	2206	1317	1811	RNASEQG00000001604	8	8	9	6	7	6	0	7	6	0	2682	0	858	6	504	4	3554	31296729	31325384	297	395	unchanged
ENSDARG00000013302	ENSDART00000005118	8	42129185	42134630	-1	BC046044.1	1580	633	RNASEQT00000023293	42129618	42134650	1167	633	748	RNASEQG00000023293	3	3	3	3	2	2	0	2	2	0	656	0	1147	3	633	3	6558	42130037	42130037	852	419	extend	0	226	1
ENSDARG00000017242	ENSDART00000005127	7	44070323	44078200	1	BC045411.1	3025	2604	RNASEQT00000007361	44069876	44078200	3472	2604	3120	RNASEQG00000007361	6	6	6	6	5	5	0	5	5	0	581	0	3025	6	2604	6	5839	44077848	44077848	352	352	trim	3881	0
ENSDARG00000009681	ENSDART00000005140	8	12402205	12505597	-1	BC057508.1	1240	936	RNASEQT00000023013	12402205	12505634	1277	936	994	RNASEQG00000023013	8	8	8	8	7	7	0	7	7	0	3279	0	1240	8	936	8	5756	12402488	12402488	283	283	trim	179	0
ENSDARG00000007241	ENSDART00000005143	2	31734156	31736244	1	BC045424.1	1691	1191	RNASEQT00000003932	31734016	31736244	1831	1191	1503	RNASEQG00000003932	3	2	3	2	2	2	0	1	1	0	1237	1	1691	3	1191	2	15119	31735916	31735916	328	328	trim	136	0
ENSDARG00000004823	ENSDART00000005145	18	20423092	20454832	-1	AY273805.1	1722	1443	RNASEQT00000005023	20423091	20454855	1746	1443	1547	RNASEQG00000005023	13	13	13	13	12	12	0	12	12	0	2492	0	1722	13	1443	13	4939	20423290	20423290	198	199	trim	804	0
ENSDARG00000018411	ENSDART00000005179	11	13362193	13375264	1	BC154477.1	2553	1200	RNASEQT00000000149	13362072	13375264	2566	1386	1491	RNASEQG00000000149	14	11	15	14	13	13	0	10	10	0	5865	7	2439	12	1200	10	20929	13374075	13374075	1189	1075	trim	11	0
ENSDARG00000052623	ENSDART00000005195	13	46547708	46567519	1	BC080207.1	1985	1239	RNASEQT00000011539	46547567	46567519	2126	1239	1409	RNASEQG00000011539	11	11	11	11	10	10	0	10	10	0	6559	1	1985	11	1239	11	14463	46566802	46566802	717	717	trim	156	0
ENSDARG00000021059	ENSDART00000005217	11	246451	255897	-1	BC054574.1	2029	1842	RNASEQT00000000008	246453	256068	2198	1842	2035	RNASEQG00000000008	10	10	10	10	9	9	0	9	9	0	11954	2	2027	10	1842	10	40906	246616	246616	165	163	trim	196	0
ENSDARG00000020964	ENSDART00000005221	15	18861946	18870551	1	BC075781.1	2452	2241	RNASEQT00000017721	18861807	18870782	2822	2241	2448	RNASEQG00000017721	5	5	5	5	4	4	0	4	4	0	338	1	2452	5	2241	5	5705	18870408	18870408	143	374	unchanged
ENSDARG00000043557	ENSDART00000005244	20	16743464	16749655	1	BC163778.1	1342	1239	0	0	0	0	0	0	0	2	2	0	0	1	0	0	1	0	0	0	0	0	0	0	0	42	16749602	0	53	No match
ENSDARG00000014463	ENSDART00000005263	5	31441903	31456337	1	BC065876.1	1616	852	RNASEQT00000005891	31432432	31456337	2686	852	2033	RNASEQG00000005891	11	10	14	10	10	10	0	9	9	0	4610	1	1616	10	852	10	7473	31455684	31455684	653	653	trim	184	0
ENSDARG00000020332	ENSDART00000005296	17	38422623	38423908	1	BC091676.1	1166	780	RNASEQT00000002522	38422555	38424370	1536	675	850	RNASEQG00000002522	2	2	3	2	1	1	0	1	1	0	9	0	1017	1	675	2	243	38423524	38423524	384	686	unchanged
ENSDARG00000015709	ENSDART00000005299	25	31185687	31220190	1	BC063943.1	1995	960	RNASEQT00000010626	31185362	31220194	2324	960	1402	RNASEQG00000010626	11	11	11	11	10	9	1	10	9	1	18132	4183	1995	11	960	11	75081	31219272	31219272	918	922	trim	104	0
ENSDARG00000012426	ENSDART00000005321	8	7444403	7447030	-1	BC114232.1	2210	1740	RNASEQT00000022960	7444403	7448038	3307	1554	2624	RNASEQG00000022960	4	4	3	3	3	2	0	3	2	0	399	0	2210	2	1528	2	5729	7444811	7445086	408	683	extend	0	810	75
ENSDARG00000013329	ENSDART00000005326	7	20685912	20696001	1	BC093176.1	1598	1341	RNASEQT00000007075	20685853	20696006	1662	1350	1411	RNASEQG00000007075	10	10	10	10	9	9	0	9	9	0	2078	0	1598	10	1341	10	3771	20695755	20695755	246	251	trim	17	0
ENSDARG00000011521	ENSDART00000005345	8	31547489	31578685	1	BC053204.1	1317	1155	RNASEQT00000023746	31547384	31583496	6233	1155	1284	RNASEQG00000023746	10	10	10	10	9	9	0	9	9	0	790	0	1317	10	1155	10	1388	31578547	31578547	138	4949	unchanged
ENSDARG00000009253	ENSDART00000005355	17	14625514	14635970	1	BC049049.1	1151	729	RNASEQT00000001804	14625456	14635975	1214	729	891	RNASEQG00000001804	8	8	8	8	7	7	0	7	7	0	3734	1	1151	8	729	8	6494	14635652	14635652	318	323	trim	11	0
ENSDARG00000012247	ENSDART00000005359	8	14702253	14726802	-1	BC054935.1	2197	1839	RNASEQT00000023036	14702272	14756868	9671	0	4798	No match	11	11	29	0	10	10	0	10	10	0	727	0	2178	10	0	0	2134	14702522	14729498	269	4873	trim	128	0
ENSDARG00000013837	ENSDART00000005373	23	6595368	6624933	1	BC065463.1	1577	1152	RNASEQT00000009978	6595239	6625029	1802	1152	1485	RNASEQG00000009978	13	13	13	13	12	12	0	12	12	0	267	0	1577	13	1152	13	651	6624712	6624712	221	317	unchanged
ENSDARG00000012325	ENSDART00000005381	2	16270211	16279052	1	BC092837.1	1450	1053	RNASEQT00000003758	16270200	16279052	1461	1053	1168	RNASEQG00000003758	11	11	11	11	10	10	0	10	10	0	1123	0	1450	11	1053	11	2225	16278759	16278759	293	293	trim	76	0
ENSDARG00000013576	ENSDART00000005382	2	36660774	36662818	1	BC095819.1	1195	477	RNASEQT00000003974	36660632	36662818	1337	477	789	RNASEQG00000003974	4	4	4	4	3	3	0	3	3	0	647	0	1195	4	477	4	5520	36662270	36662270	548	548	trim	1405	0
ENSDARG00000020454	ENSDART00000005431	18	43032246	43040312	-1	BC071432.1	1463	804	RNASEQT00000005153	43032250	43040342	1489	804	887	RNASEQG00000005153	7	7	7	7	6	6	0	6	6	0	7883	0	1459	7	804	7	19095	43032852	43032852	606	602	trim	30	0
ENSDARG00000013975	ENSDART00000005456	12	31311817	31390202	1	AY436321.1	1446	1446	RNASEQT00000013540	31335202	31392973	4607	1446	1836	RNASEQG00000013540	9	9	9	9	8	7	0	8	7	0	146	0	1385	8	1385	8	380	31390202	31390202	0	2771	extend	0	1960	3
ENSDARG00000012747	ENSDART00000005464	8	51202748	51219242	1	AY398406.1	1579	591	RNASEQT00000023359	51202593	51219794	1306	753	789	RNASEQG00000023359	7	6	8	7	6	6	0	5	5	0	9319	1	673	6	591	5	16868	51218297	51218297	945	517	trim	119	0
ENSDARG00000013292	ENSDART00000005473	20	27423273	27426175	1	BC078227.1	1156	699	RNASEQT00000015425	27423066	27426177	1365	732	926	RNASEQG00000015425	4	4	4	4	3	3	0	3	3	0	284	0	1156	4	699	4	1523	27425738	27425738	437	439	trim	263	0
ENSDARG00000003845	ENSDART00000005479	21	33652613	33759725	1	AY500891.1	2526	2001	RNASEQT00000003019	33652582	33759723	2555	2001	2050	RNASEQG00000003019	15	15	15	15	14	14	0	14	14	0	4014	7	2524	15	2001	15	9085	33759218	33759218	507	505	trim	114	0
ENSDARG00000044976	ENSDART00000005485	11	11575926	11579586	-1	BC115321.1	1619	1389	0	0	0	0	0	0	0	8	8	0	0	7	7	0	7	7	0	7981	0	0	0	0	0	17906	11576093	0	167	No match
ENSDARG00000006120	ENSDART00000005491	15	26713725	26720073	1	AF136946.1	2016	2016	RNASEQT00000017348	26711099	26721079	5650	2064	4660	RNASEQG00000017348	8	8	7	7	7	6	0	7	6	0	1557	0	2016	6	2016	6	6657	26720073	26720089	0	990	trim	463	0
ENSDARG00000010603	ENSDART00000005496	10	43907695	43920943	1	BC076416.1	1564	1170	RNASEQT00000024348	43907602	43922103	2817	1170	1321	RNASEQG00000024348	12	12	12	12	11	10	1	11	10	1	1657	90	1564	12	1170	12	3062	43920607	43920607	336	1496	extend	0	1127	0
ENSDARG00000002696	ENSDART00000005547	19	5730437	5749668	-1	BC065866.1	1848	1017	RNASEQT00000024897	5730433	5749887	1990	1017	1337	RNASEQG00000024897	9	8	10	8	8	8	0	7	7	0	12727	3	1771	8	1017	8	40563	5731086	5731086	649	653	trim	277	0
ENSDARG00000004415	ENSDART00000005562	12	32668774	32790288	-1	AF507956.1	2152	1434	RNASEQT00000013556	32666839	32790477	4261	1419	1797	RNASEQG00000013556	15	14	15	14	14	14	0	13	13	0	2738	1	2137	14	1419	13	6198	32671934	32671934	529	2464	trim	73	0
ENSDARG00000074248	ENSDART00000005573	6	7810053	7827903	-1	BC081384.1	1465	1242	RNASEQT00000014258	7810053	7827946	1494	1122	1405	RNASEQG00000014258	14	14	13	10	13	11	0	13	11	0	1375	0	1451	13	1122	9	1948	7810142	7810142	89	89	trim	9	0
ENSDARG00000012094	ENSDART00000005587	12	3448945	3487535	1	BC093222.1	1808	1140	RNASEQT00000013275	3448907	3474325	2094	1140	1297	RNASEQG00000013275	11	10	11	10	10	9	0	9	8	0	1519	0	1086	10	967	9	2655	3486986	3473528	549	797	extend	0	597	0
ENSDARG00000010831	ENSDART00000005590	20	25959048	25964055	-1	BC085457.1	909	339	RNASEQT00000015399	25959048	25964139	993	339	479	RNASEQG00000015399	4	4	4	4	3	3	0	3	3	0	1269	0	909	4	339	4	6033	25959562	25959562	514	514	trim	25	0
ENSDARG00000005479	ENSDART00000005592	1	39960337	40139975	1	GQ917212.1	8515	7773	RNASEQT00000008604	39750270	40140106	9964	8337	9102	RNASEQG00000008604	26	26	31	30	25	25	0	25	25	0	2028	1	8512	25	7773	25	14800	40139244	40139244	731	862	trim	2367	0
ENSDARG00000017905	ENSDART00000005593	1	16269273	16278202	1	BC078310.1	2918	849	RNASEQT00000008424	16269162	16278202	3029	849	1241	RNASEQG00000008424	7	6	7	6	6	6	0	5	5	0	2795	2	2918	7	849	6	24249	16276414	16276414	1788	1788	extend	0	1096	0
ENSDARG00000008639	ENSDART00000005609	20	34445231	34478167	-1	BC080842.1	3584	2370	RNASEQT00000015499	34445227	34478220	3641	2370	2519	RNASEQG00000015499	20	20	20	20	19	18	1	19	18	1	1683	53	3584	20	2370	20	4508	34446349	34446349	1118	1122	trim	606	0
ENSDARG00000012506	ENSDART00000005616	11	25692668	25716450	1	BC076412.1	1982	1881	RNASEQT00000000237	25692565	25716669	2304	1881	2050	RNASEQG00000000237	11	11	11	11	10	10	0	10	10	0	1515	1	1982	11	1881	11	2887	25716415	25716415	35	254	trim	13	0
ENSDARG00000016837	ENSDART00000005625	16	29843276	29850419	1	BC083432.1	1294	465	RNASEQT00000012380	29843228	29850419	1342	465	758	RNASEQG00000012380	5	5	5	5	4	4	0	4	4	0	1146	0	1294	5	465	5	6652	29849835	29849835	584	584	trim	103	0
ENSDARG00000015394	ENSDART00000005639	11	20023600	20031697	1	BC076191.1	769	609	RNASEQT00000000193	20023553	20031697	816	609	687	RNASEQG00000000193	8	8	8	8	7	7	0	7	7	0	8969	1	769	8	609	8	6672	20031568	20031568	129	129	trim	374	0
ENSDARG00000003444	ENSDART00000005670	13	31760314	31767885	-1	BC122451.1	1214	1017	RNASEQT00000011403	31760314	31769002	1252	1017	1100	RNASEQG00000011403	7	7	8	7	6	6	0	6	6	0	656	0	1214	6	1017	7	2478	31760466	31760466	152	152	extend	0	38	1
ENSDARG00000013755	ENSDART00000005682	21	26777347	26799361	1	BC054911.1	3188	2691	RNASEQT00000002952	26777287	26799365	3252	2691	2898	RNASEQG00000002952	21	21	21	21	20	20	0	20	20	0	56145	4	3188	21	2691	21	116270	26799011	26799011	350	354	trim	54	0
ENSDARG00000016968	ENSDART00000005702	4	470797	481221	-1	BC054691.1	1681	915	RNASEQT00000020554	470797	486676	2915	2019	2579	RNASEQG00000020554	12	10	16	16	11	10	0	9	8	0	5397	0	1680	10	914	7	12966	473365	471133	766	336	trim	65	0
ENSDARG00000077404	ENSDART00000005715	11	19086010	19094575	1	DQ017645.1	573	573	RNASEQT00000000184	19032765	19119912	6509	4494	4625	RNASEQG00000000184	4	4	23	22	3	3	0	3	3	0	320	0	573	2	573	2	1074	19094575	19118028	0	1884	trim	40	0
ENSDARG00000006266	ENSDART00000005720	22	12937890	12964394	1	BC060933.1	2541	2250	RNASEQT00000001038	12937797	12966252	4492	2250	2467	RNASEQG00000001038	25	24	25	24	24	24	0	23	23	0	10687	2	2541	25	2250	24	9211	12964227	12964227	167	2025	trim	184	0
ENSDARG00000002401	ENSDART00000005727	17	24708486	24719000	-1	BC115183.1	1432	1050	RNASEQT00000001917	24708482	24721536	3056	1053	2750	RNASEQG00000001917	11	10	12	10	10	10	0	9	9	0	4753	0	1419	9	1050	9	5446	24708788	24708788	302	306	trim	284	0
ENSDARG00000005620	ENSDART00000005732	14	48374810	48405920	-1	BC066703.1	3089	1602	RNASEQT00000018371	48374810	48406358	3430	1602	2162	RNASEQG00000018371	6	5	6	5	5	4	0	4	4	0	1911	17	2858	4	1602	5	21558	48376309	48376309	1365	1268	trim	44	0
ENSDARG00000013042	ENSDART00000005775	1	40343980	40377036	-1	BC076023.1	1519	837	RNASEQT00000008607	40343982	40377737	2218	837	1678	RNASEQG00000008607	2	2	2	2	1	1	0	1	1	0	565	0	1517	2	837	2	11521	40344522	40344522	542	540	trim	201	0
ENSDARG00000007169	ENSDART00000005784	17	35392403	35405445	-1	BC108035.1	1250	597	RNASEQT00000002505	35390953	35405493	2748	597	809	RNASEQG00000002505	7	6	7	6	6	6	0	5	5	0	1835	1	1250	7	597	6	5345	35392892	35392892	489	1939	unchanged
ENSDARG00000016457	ENSDART00000005801	12	14388842	14412924	1	AY398365.1	1765	1185	RNASEQT00000013819	14388582	14422966	2460	1287	1641	RNASEQG00000013819	10	9	11	9	9	8	0	8	7	0	1851	0	1763	8	1183	8	3508	14412438	14412542	486	819	unchanged
ENSDARG00000055108	ENSDART00000005829	22	27461080	27474426	-1	BC154208.1	2206	1002	0	0	0	0	0	0	0	6	6	0	0	5	5	0	5	5	0	740	0	0	0	0	0	4804	27462077	0	997	No match
ENSDARG00000017542	ENSDART00000005842	14	24636193	24641824	-1	BC059588.1	1711	444	RNASEQT00000018642	24637265	24641964	779	444	680	RNASEQG00000018642	3	3	3	3	2	2	0	2	2	0	80	0	639	3	444	3	620	24637364	24637364	1171	99	unchanged
ENSDARG00000016794	ENSDART00000005845	24	25640288	25667486	1	BC044359.1	2738	1932	RNASEQT00000019753	25640270	25667486	2756	1932	2144	RNASEQG00000019753	14	14	14	14	13	13	0	13	13	0	2514	2	2738	14	1932	14	6713	25666874	25666874	612	612	trim	315	0
ENSDARG00000011462	ENSDART00000005853	7	25982901	25995947	-1	BC076301.1	1164	765	RNASEQT00000007148	25982901	26005511	3376	0	1369	No match	7	7	17	0	6	5	1	6	5	1	3503	386	1164	6	0	0	5128	25983247	25997770	346	2007	trim	404	0
ENSDARG00000020982	ENSDART00000005857	8	55712509	55734500	1	BC139696.1	2961	2610	RNASEQT00000023959	55712199	55736726	5497	2610	3057	RNASEQG00000023959	8	7	8	7	7	6	1	6	6	0	260	89	2961	8	2610	7	3973	55734286	55734286	214	2440	unchanged
ENSDARG00000011152	ENSDART00000005869	22	10268643	10275013	1	BC095792.1	1473	378	RNASEQT00000000991	10267777	10274682	1659	378	1117	RNASEQG00000000991	6	5	8	5	5	5	0	4	4	0	1698	1	1017	4	378	5	4943	10274015	10274015	998	542	trim	1314	0
ENSDARG00000030915	ENSDART00000005877	25	18935487	18941276	-1	BC095726.1	1438	1257	0	0	0	0	0	0	0	11	11	0	0	10	10	0	10	10	0	322	0	0	0	0	0	2753	18935654	0	167	No match
ENSDARG00000002235	ENSDART00000005884	7	25291387	25316722	-1	AY324196.1	3463	1725	RNASEQT00000007133	25291381	25316867	3614	1725	2178	RNASEQG00000007133	10	10	10	10	9	9	0	9	9	0	2740	0	3463	10	1725	10	17230	25292817	25292817	1430	1436	extend	0	1120	2
ENSDARG00000015292	ENSDART00000005893	5	32625529	32634125	1	BC045512.1	2172	513	RNASEQT00000005909	32625355	32634120	2016	513	805	RNASEQG00000005909	6	5	7	5	5	5	0	4	4	0	3386	127	1842	5	513	5	26071	32630904	32630904	1541	1211	trim	237	0
ENSDARG00000018263	ENSDART00000005895	1	9030585	9040848	1	BC045330.1	1832	837	RNASEQT00000008366	9030523	9040848	1894	1668	1762	RNASEQG00000008366	11	5	11	11	10	10	0	4	4	0	1479	0	1832	11	837	4	4872	9037256	9040716	963	132	trim	333	0
ENSDARG00000020145	ENSDART00000005897	15	32140434	32169774	1	BC059657.1	2544	1239	RNASEQT00000017406	32140369	32169777	2513	1140	1387	RNASEQG00000017406	4	3	5	4	3	3	0	2	2	0	821	0	2445	3	1140	2	11189	32168651	32168651	1123	1126	trim	13	0
ENSDARG00000009447	ENSDART00000005903	6	10741795	10746736	-1	BC045894.1	831	423	RNASEQT00000014840	10740571	10746889	1921	423	585	RNASEQG00000014840	4	4	6	4	3	3	0	3	3	0	38543	5	662	2	423	4	67148	10741983	10741983	188	1336	unchanged
ENSDARG00000019973	ENSDART00000005906	8	26443793	26458474	-1	BC044428.1	2300	1407	RNASEQT00000023174	26443800	26458570	2389	1407	1570	RNASEQG00000023174	14	13	14	13	13	13	0	12	12	0	3822	0	2293	14	1407	13	9753	26444619	26444619	826	819	trim	695	0
ENSDARG00000033597	ENSDART00000005913	25	31120702	31141667	1	BC057483.1	1525	567	RNASEQT00000010625	31120635	31141840	2870	1590	1881	RNASEQG00000010625	6	6	14	14	5	4	0	5	4	0	4401	1	1525	4	485	4	65903	31140933	31140851	734	989	trim	298	0
ENSDARG00000004282	ENSDART00000005923	11	444191	459293	-1	BC065350.1	1530	1290	RNASEQT00000000447	444102	459414	1740	1290	1595	RNASEQG00000000447	8	8	8	8	7	7	0	7	7	0	425	0	1530	8	1290	8	1733	444247	444247	56	145	unchanged
ENSDARG00000019179	ENSDART00000005957	13	29686034	29691156	1	BC095674.1	3139	1932	RNASEQT00000011856	29685952	29690447	2613	1932	2131	RNASEQG00000011856	5	4	4	4	4	3	0	3	3	0	125	1	2531	3	1932	4	2509	29689965	29689965	1090	482	unchanged
ENSDARG00000002952	ENSDART00000005985	4	14036888	14042253	1	AY029808.1	2879	2469	RNASEQT00000020719	14036604	14045064	5974	2469	3134	RNASEQG00000020719	12	12	12	12	11	11	0	11	11	0	2307	0	2879	12	2469	12	8214	14042224	14042224	29	2840	trim	1888	0
ENSDARG00000009727	ENSDART00000005999	11	18465653	18480950	-1	BC095669.1	1534	1095	0	0	0	0	0	0	0	10	10	0	0	9	8	0	9	8	0	115	0	0	0	0	0	314	18465905	0	252	No match
ENSDARG00000040252	ENSDART00000006013	1	1594950	1606853	1	AY094620.1	3783	3072	0	0	0	0	0	0	0	22	22	0	0	21	21	0	21	21	0	1824	0	0	0	0	0	6372	1606210	0	643	No match
ENSDARG00000017078	ENSDART00000006018	7	16098670	16101162	1	AF188833.1	869	672	RNASEQT00000007787	16076901	16101166	886	375	690	RNASEQG00000007787	2	2	4	2	1	1	0	1	1	0	33	0	684	1	375	2	433	16100970	16100970	192	196	unchanged
ENSDARG00000004724	ENSDART00000006061	16	36529278	36552615	1	BC065444.1	1864	1230	RNASEQT00000013000	36529164	36553061	3630	2022	2264	RNASEQG00000013000	14	14	25	22	13	10	1	13	10	1	1502	218	1864	12	847	9	2934	36552109	36549135	506	1366	unchanged
ENSDARG00000087868	ENSDART00000006065	23	42849544	42862138	-1	BC124396.1	1793	1497	0	0	0	0	0	0	0	9	9	0	0	8	8	0	8	8	0	137	0	0	0	0	0	538	42849812	0	268	No match
ENSDARG00000020009	ENSDART00000006079	5	40699837	40743973	1	BC086712.1	2895	1938	RNASEQT00000006011	40698960	40753222	5627	3246	4511	RNASEQG00000006011	15	15	16	16	14	12	2	14	12	2	7267	1159	2315	14	1927	14	22438	40743404	40752106	569	1116	trim	58	0
ENSDARG00000009958	ENSDART00000006085	15	22561648	22618944	1	BC085671.1	4002	2742	RNASEQT00000017301	22561268	22621848	5194	2742	3404	RNASEQG00000017301	16	16	17	16	15	15	0	15	15	0	1861	2	3633	15	2742	16	8660	22617966	22617966	978	1790	trim	10	0
ENSDARG00000018698	ENSDART00000006091	3	34234628	34256132	1	BC078292.1	1961	1767	RNASEQT00000022645	34234497	34260122	3974	1767	1907	RNASEQG00000022645	16	16	18	16	15	15	0	15	15	0	28503	3	1961	15	1767	16	15963	34255947	34255947	185	2067	unchanged
ENSDARG00000015158	ENSDART00000006093	16	25543187	25554903	1	BC090168.1	1973	660	RNASEQT00000012884	25543157	25559554	1444	660	833	RNASEQG00000012884	6	6	7	6	5	5	0	5	5	0	435	0	829	5	660	6	2574	25553733	25553733	1170	611	unchanged
ENSDARG00000014976	ENSDART00000006099	9	423989	430060	-1	BC095708.1	1285	1134	0	0	0	0	0	0	0	11	10	0	0	10	10	0	9	9	0	2324	0	0	0	0	0	2926	424292	0	133	No match
ENSDARG00000009837	ENSDART00000006109	18	20313329	20321420	1	BC045347.1	2480	1269	RNASEQT00000005017	20313323	20321421	2487	1269	1395	RNASEQG00000005017	15	15	15	15	14	14	0	14	14	0	2544	0	2480	15	1269	15	4843	20320329	20320329	1091	1092	trim	129	0
ENSDARG00000003250	ENSDART00000006120	23	29999499	30055559	-1	BC054896.1	4982	3120	RNASEQT00000010170	29999488	30055716	5150	3120	3497	RNASEQG00000010170	23	22	23	22	22	22	0	21	21	0	1820	0	4982	23	3120	22	6246	30001141	30001141	1642	1653	unchanged
ENSDARG00000004785	ENSDART00000006124	25	33344713	33360270	-1	BC071320.1	1968	1332	RNASEQT00000010646	33344704	33360968	2055	1332	1442	RNASEQG00000010646	13	13	14	13	12	12	0	12	12	0	8199	0	1968	12	1332	13	13740	33345317	33345317	604	613	trim	93	0
ENSDARG00000021124	ENSDART00000006132	14	31665228	31670900	1	AY398324.1	1389	498	RNASEQT00000018260	31664960	31670903	1660	498	831	RNASEQG00000018260	4	4	4	4	3	3	0	3	3	0	25171	8	1389	4	498	4	158921	31670074	31670074	826	829	trim	3955	0
ENSDARG00000033273	ENSDART00000006147	1	20345989	20355661	1	BC108066.1	1953	1572	RNASEQT00000009045	20345922	20356121	2480	1572	1808	RNASEQG00000009045	14	13	14	13	13	13	0	12	12	0	1238	0	1953	14	1572	13	2248	20355449	20355449	212	672	unchanged
ENSDARG00000003257	ENSDART00000006256	9	17945403	17950374	1	BC085368.1	3184	702	RNASEQT00000016234	17945350	17950373	3236	702	763	RNASEQG00000016234	2	2	2	2	1	1	0	1	1	0	25	0	3183	2	702	2	2572	17947900	17947900	2474	2473	extend	0	1491	19
ENSDARG00000003208	ENSDART00000006257	13	8914255	8920823	1	BC085371.1	1578	1044	RNASEQT00000011198	8914193	8923777	4594	1044	1256	RNASEQG00000011198	3	2	3	2	2	2	0	1	1	0	244	0	1578	3	1044	2	1929	8920439	8920439	384	3338	extend	0	3053	34
ENSDARG00000013150	ENSDART00000006288	15	34195901	34229815	-1	BC045393.1	3456	3165	0	0	0	0	0	0	0	21	20	0	0	20	20	0	19	19	0	5625	1	0	0	0	0	11572	34196112	0	211	No match
ENSDARG00000016038	ENSDART00000006300	18	18762809	18775987	1	BC055174.1	1666	1080	0	0	0	0	0	0	0	11	11	0	0	10	10	0	10	10	0	2314	1	0	0	0	0	5150	18775519	0	468	No match
ENSDARG00000003207	ENSDART00000006338	19	45564763	45571762	-1	BC075975.1	1337	1209	RNASEQT00000025707	45564736	45572028	1630	1209	1551	RNASEQG00000025707	8	7	8	7	7	7	0	6	6	0	1168	0	1337	8	1209	7	3052	45564815	45564815	52	79	unchanged
ENSDARG00000016350	ENSDART00000006344	19	44846527	44867611	-1	BC150356.1	1712	1392	RNASEQT00000025268	44846527	44867838	1939	1392	1685	RNASEQG00000025268	13	12	13	12	12	12	0	11	11	0	7144	1	1712	13	1392	12	11952	44846781	44846781	254	254	trim	117	0
ENSDARG00000013979	ENSDART00000006373	14	24621449	24630994	1	BC044423.1	1762	636	RNASEQT00000018193	24621307	24630997	1756	636	937	RNASEQG00000018193	7	7	8	7	6	6	0	6	6	0	7961	13	1611	6	636	7	31383	24630027	24630027	967	819	trim	300	0
ENSDARG00000010878	ENSDART00000006378	7	50120654	50124046	-1	BC153451.1	1566	639	RNASEQT00000007397	50120654	50124059	1605	639	1130	RNASEQG00000007397	5	3	5	3	4	3	0	2	2	0	1420	3	1566	4	639	3	6195	50121129	50121129	475	475	trim	4	0
ENSDARG00000015540	ENSDART00000006381	1	51558298	51571697	-1	AF178539.1	1809	1326	RNASEQT00000008720	51558378	51571743	1775	1326	1486	RNASEQG00000008720	11	10	11	10	10	10	0	9	9	0	2128	0	1729	11	1326	10	4803	51558667	51558667	369	289	trim	127	0
ENSDARG00000013144	ENSDART00000006386	6	28931241	28941282	1	BC066590.1	2213	921	RNASEQT00000014444	28931189	28941282	2149	921	1067	RNASEQG00000014444	6	6	7	6	5	5	0	5	5	0	8452	16	2097	5	921	6	108594	28940084	28940084	1198	1082	trim	1690	0
ENSDARG00000003965	ENSDART00000006393	13	28491599	28495901	-1	AF398517.1	2223	906	RNASEQT00000011847	28491418	28495935	2438	906	1052	RNASEQG00000011847	3	3	3	3	2	2	0	2	2	0	18	0	2223	3	906	3	232	28492804	28492804	1205	1386	unchanged
ENSDARG00000018030	ENSDART00000006409	8	54781786	54803229	1	BC162651.1	1352	1332	RNASEQT00000023935	54781782	54804531	2658	1176	1336	RNASEQG00000023935	8	8	8	8	7	7	0	7	7	0	329	0	1352	8	1176	8	1072	54803209	54803209	20	1322	unchanged
ENSDARG00000013561	ENSDART00000006417	6	31702355	31717370	-1	BC055219.1	1981	1686	RNASEQT00000014469	31702355	31717387	1998	1686	1791	RNASEQG00000014469	11	11	11	11	10	10	0	10	10	0	11719	0	1981	11	1686	11	27955	31702562	31702562	207	207	trim	116	0
ENSDARG00000011921	ENSDART00000006419	21	1107702	1118848	1	BC045322.1	1630	870	RNASEQT00000002709	1107655	1118854	1713	870	1073	RNASEQG00000002709	9	8	8	8	8	7	0	7	7	0	10175	6	1630	7	870	8	35239	1118214	1118214	604	640	trim	48	0
ENSDARG00000007959	ENSDART00000006429	16	22955454	22973742	1	BC055573.1	1377	990	RNASEQT00000012278	22955461	22973941	1569	990	1034	RNASEQG00000012278	8	8	8	8	7	7	0	7	7	0	5264	3	1370	8	990	8	11885	22973406	22973406	336	535	trim	340	0
ENSDARG00000006607	ENSDART00000006435	6	43834509	43838620	1	BC155840.1	4112	1116	0	0	0	0	0	0	0	1	1	0	0	0	0	0	0	0	0	0	0	0	0	0	0	2310	43836109	0	2511	No match
ENSDARG00000020373	ENSDART00000006439	16	51794542	51906798	1	BC133117.1	3439	2193	RNASEQT00000012597	51794391	51907177	3969	2193	2913	RNASEQG00000012597	11	11	11	11	10	9	1	10	9	1	2036	268	3439	11	2193	11	9845	51906121	51906121	677	1056	trim	5549	0
ENSDARG00000011000	ENSDART00000006443	20	16478206	16494036	-1	BC048894.1	2705	1110	RNASEQT00000015318	16478206	16494117	2705	1029	1290	RNASEQG00000015318	10	10	11	11	9	9	0	9	9	0	11831	11	2624	9	1029	9	71752	16479621	16479621	1415	1415	trim	267	0
ENSDARG00000007739	ENSDART00000006449	1	1546143	1553620	1	AF286374.1	3234	3072	0	0	0	0	0	0	0	22	22	0	0	21	21	0	21	21	0	29306	3	0	0	0	0	50505	1553519	0	101	No match
ENSDARG00000012294	ENSDART00000006455	7	70402778	70431111	-1	BC047823.1	2740	2460	RNASEQT00000007537	70398994	70431102	5814	2460	2471	RNASEQG00000007537	22	22	23	22	21	21	0	21	21	0	11250	0	2731	21	2460	22	17029	70403038	70403038	260	3343	trim	124	0
ENSDARG00000004046	ENSDART00000006463	14	32363153	32377618	1	BC044163.1	1760	1092	RNASEQT00000018269	32363041	32390718	4070	1092	1318	RNASEQG00000018269	11	9	20	9	10	10	0	8	8	0	4085	1	1341	10	1092	9	8323	32373311	32373311	554	2752	trim	1345	0
ENSDARG00000058103	ENSDART00000006474	5	24298682	24327466	-1	BC085599.1	1906	1599	RNASEQT00000005780	24297355	24327520	3287	1479	1654	RNASEQG00000005780	10	10	10	10	9	9	0	9	9	0	77	0	1906	10	1479	10	354	24298988	24298988	306	1633	trim	544	0
ENSDARG00000004078	ENSDART00000006489	14	29459069	29479565	1	BC057476.1	3849	2121	RNASEQT00000018236	29459026	29479565	3892	2121	2374	RNASEQG00000018236	15	14	15	14	14	14	0	13	13	0	4774	0	3849	15	2121	14	18792	29478047	29478047	1518	1518	trim	498	0
ENSDARG00000021346	ENSDART00000006513	22	10312015	10322651	1	BC053233.1	1381	1080	RNASEQT00000000992	10311757	10322651	1639	1080	1350	RNASEQG00000000992	10	10	10	10	9	9	0	9	9	0	17903	1	1381	10	1080	10	24846	10322362	10322362	289	289	trim	123	0
ENSDARG00000006816	ENSDART00000006514	9	19447403	19523363	1	BC092783.1	1053	771	RNASEQT00000016761	19447346	19524087	1834	771	924	RNASEQG00000016761	8	8	8	8	7	5	0	7	5	0	464	0	1053	8	771	8	1283	19523177	19523177	186	910	unchanged
ENSDARG00000030703	ENSDART00000006538	1	51430588	51439274	1	BC076432.1	1624	1017	RNASEQT00000008715	51430584	51439281	1635	1017	1287	RNASEQG00000008715	4	3	4	3	3	3	0	2	2	0	230	0	1624	4	1017	3	3180	51438933	51438933	341	348	trim	702	0
ENSDARG00000020289	ENSDART00000006549	2	16918152	16936148	-1	BC045956.1	2449	1920	RNASEQT00000003770	16918150	16936185	2488	1920	2028	RNASEQG00000003770	13	12	13	12	12	12	0	11	11	0	17481	1	2449	13	1920	12	37078	16918610	16918610	458	460	trim	168	0
ENSDARG00000018681	ENSDART00000006579	25	8444015	8465457	-1	BC044415.1	1729	1410	RNASEQT00000010820	8443432	8465494	2349	1410	1580	RNASEQG00000010820	13	13	13	13	12	12	0	12	12	0	1512	0	1729	13	1410	13	2623	8444201	8444201	186	769	unchanged
ENSDARG00000020679	ENSDART00000006604	3	34214809	34221668	-1	BC095769.1	1179	801	0	0	0	0	0	0	0	7	7	0	0	6	6	0	6	6	0	13443	0	0	0	0	0	11018	34215150	0	341	No match
ENSDARG00000004712	ENSDART00000006612	9	52776694	52782926	-1	BC168510.1	3853	2031	RNASEQT00000016576	52777559	52782936	2998	2031	2125	RNASEQG00000016576	6	6	6	6	5	5	0	5	5	0	265	0	2988	6	2031	6	2784	52778432	52778432	1738	873	trim	1251	0
ENSDARG00000079578	ENSDART00000006619	7	49709628	49720504	-1	BC066414.1	1909	603	RNASEQT00000007391	49709628	49720706	1942	603	956	RNASEQG00000007391	8	7	9	7	7	7	0	6	6	0	6843	0	1740	7	603	7	31874	49710708	49710708	986	986	trim	272	0
ENSDARG00000018907	ENSDART00000006622	5	16098238	16147039	-1	AY600370.1	7796	6741	RNASEQT00000005718	16096978	16149761	9814	6741	7797	RNASEQG00000005718	16	16	18	16	15	15	0	15	15	0	2198	5	7796	14	6741	16	32434	16099159	16099159	921	2017	trim	72	0
ENSDARG00000010186	ENSDART00000006636	24	6244646	6343712	-1	AF384863.1	6704	5328	RNASEQT00000019583	6244646	6429274	10957	5328	9009	RNASEQG00000019583	39	37	50	37	38	36	1	36	35	1	1010	13	6619	36	5328	37	3507	6246594	6246594	1275	1948	extend	0	1078	3
ENSDARG00000029394	ENSDART00000006671	3	368736	403822	1	BC067172.1	3241	2502	RNASEQT00000021580	368616	403822	3361	2502	2718	RNASEQG00000021580	19	18	19	18	18	18	0	17	17	0	76872	13	3241	19	2502	18	74924	403179	403179	643	643	trim	1283	0
ENSDARG00000004130	ENSDART00000006673	5	21277531	21293019	1	BC085528.1	1766	1191	RNASEQT00000006472	21277204	21293647	2721	1191	1724	RNASEQG00000006472	10	10	10	10	9	9	0	9	9	0	1491	0	1766	10	1191	10	3081	21292650	21292650	369	997	unchanged
ENSDARG00000013122	ENSDART00000006703	11	25000972	25011400	-1	BC056831.1	3359	744	RNASEQT00000000226	25000972	25011792	3751	744	1412	RNASEQG00000000226	7	7	7	7	6	6	0	6	6	0	2464	0	3359	7	744	7	26560	25003311	25003311	2339	2339	extend	0	1675	1
ENSDARG00000008785	ENSDART00000006709	25	27744411	27759694	-1	BC044432.1	1788	1524	RNASEQT00000010989	27743743	27759722	2484	1524	1620	RNASEQG00000010989	14	14	14	14	13	13	0	13	13	0	26346	11	1788	14	1524	14	26959	27744607	27744607	196	864	unchanged
ENSDARG00000009510	ENSDART00000006726	16	820641	824793	1	AF359505.1	1725	1281	RNASEQT00000012665	820202	824848	2219	1281	1890	RNASEQG00000012665	4	4	4	4	3	3	0	3	3	0	887	1	1725	4	1281	4	3997	824519	824519	274	329	unchanged
ENSDARG00000011582	ENSDART00000006737	4	16053213	16124134	-1	BC163449.1	2532	2280	RNASEQT00000020748	16049605	16124192	6114	2196	2422	RNASEQG00000020748	15	15	15	15	14	14	0	14	14	0	1198	0	2448	14	2196	14	3771	16053297	16053297	84	3692	trim	46	0
ENSDARG00000014474	ENSDART00000006748	2	26746972	26752409	-1	BC080262.1	1885	921	RNASEQT00000003872	26746972	26752476	1865	921	1082	RNASEQG00000003872	10	8	11	8	9	9	0	7	7	0	2358	0	1798	9	921	8	7039	26747842	26747842	870	783	trim	207	0
ENSDARG00000007127	ENSDART00000006778	20	30948505	30957047	-1	BC045949.1	1936	1188	RNASEQT00000015463	30948505	30957141	2030	1188	1359	RNASEQG00000015463	9	9	9	9	8	7	1	8	7	1	2277	166	1936	9	1188	9	7776	30949176	30949176	671	671	trim	207	0
ENSDARG00000020363	ENSDART00000006783	3	46415421	46418013	-1	BC093151.1	977	522	RNASEQT00000022064	46415421	46418040	1004	522	758	RNASEQG00000022064	5	5	5	5	4	4	0	4	4	0	2623	0	977	5	522	5	2523	46415667	46415667	246	246	trim	472	0
ENSDARG00000003553	ENSDART00000006795	7	53819828	53823923	1	EF571593.1	1239	1239	0	0	0	0	0	0	0	3	3	0	0	2	0	0	2	0	0	0	0	0	0	0	0	43	53823923	0	0	No match
ENSDARG00000007385	ENSDART00000006802	7	60624250	60632156	-1	AF506229.1	2072	1644	RNASEQT00000007492	60624252	60632227	2141	1644	1742	RNASEQG00000007492	11	11	11	11	10	10	0	10	10	0	21498	5	2070	11	1644	11	59012	60624651	60624651	401	399	trim	2071	0
ENSDARG00000015006	ENSDART00000006840	25	20721131	20750149	-1	BC055521.1	2438	2076	RNASEQT00000010556	20721131	20750272	2561	2076	2281	RNASEQG00000010556	18	18	18	18	17	17	0	17	17	0	9065	0	2438	18	2076	18	15271	20721411	20721411	280	280	trim	90	0
ENSDARG00000008772	ENSDART00000006843	6	23156003	23176975	-1	BC044150.1	2260	678	RNASEQT00000014400	23156003	23177084	2369	678	944	RNASEQG00000014400	4	4	4	4	3	3	0	3	3	0	703	1	2260	4	678	4	5871	23157428	23157428	1425	1425	trim	215	0
ENSDARG00000004539	ENSDART00000006870	2	20712504	20719864	-1	AY028585.1	2128	1806	RNASEQT00000004360	20712381	20719879	2266	1806	1889	RNASEQG00000004360	9	9	9	9	8	8	0	8	8	0	4434	1	2128	9	1806	9	14643	20712758	20712758	254	377	unchanged
ENSDARG00000006615	ENSDART00000006883	15	15016168	15031953	-1	BC129147.1	4138	1680	RNASEQT00000017229	15016168	15031974	4159	1680	1811	RNASEQG00000017229	9	9	9	9	8	8	0	8	8	0	352	0	4138	9	1680	9	5797	15018516	15018516	2348	2348	extend	0	1056	53
ENSDARG00000012504	ENSDART00000006897	7	14739932	14755905	-1	EU348853.1	1449	939	RNASEQT00000007031	14739933	14757559	1555	939	1080	RNASEQG00000007031	7	7	8	7	6	5	1	6	5	1	653	158	1446	6	939	7	2789	14740408	14740408	476	475	trim	475	0
ENSDARG00000002184	ENSDART00000006899	5	38131044	38138134	1	BC045313.1	2336	1068	RNASEQT00000005962	38130935	38138134	2445	1068	1193	RNASEQG00000005962	6	6	6	6	5	5	0	5	5	0	2370	0	2336	6	1068	6	15547	38136882	38136882	1252	1252	trim	172	0
ENSDARG00000012072	ENSDART00000006923	13	37082463	37093572	1	BC046029.1	904	600	RNASEQT00000011467	37082143	37093570	1222	600	977	RNASEQG00000011467	5	4	5	4	4	4	0	3	3	0	850	0	902	5	600	4	2446	37093325	37093325	247	245	trim	2423	0
ENSDARG00000007250	ENSDART00000006927	22	11180992	11189218	-1	BC052105.1	1785	786	RNASEQT00000001015	11180992	11189222	1789	786	849	RNASEQG00000001015	8	8	8	8	7	7	0	7	7	0	1504	0	1785	8	786	8	9552	11181932	11181932	940	940	trim	7	0
ENSDARG00000014867	ENSDART00000006948	9	34356418	34362256	-1	BC065432.1	810	774	0	0	0	0	0	0	0	5	5	0	0	4	4	0	4	4	0	60853	3	0	0	0	0	189537	34356446	0	28	No match
ENSDARG00000004735	ENSDART00000006954	20	35083269	35095054	1	AY570729.1	4130	1959	RNASEQT00000015508	35083120	35095055	4443	2391	2661	RNASEQG00000015508	13	11	13	13	12	11	0	10	9	0	33912	10	4130	11	1959	9	233867	35091559	35093273	2050	1782	trim	277	0
ENSDARG00000017820	ENSDART00000006960	Zv9_NA583	4506	16419	-1	BC049426.1	1556	1146	RNASEQT00000019479	4506	16469	1606	1146	1384	RNASEQG00000019479	9	8	9	8	8	8	0	7	7	0	1282	0	1556	9	1146	8	3225	4728	4728	222	222	trim	50	0
ENSDARG00000017386	ENSDART00000006961	4	592040	606404	-1	DQ503413.1	2007	2007	0	0	0	0	0	0	0	6	6	0	0	5	5	0	5	5	0	113	0	0	0	0	0	1344	592040	0	0	No match
ENSDARG00000010385	ENSDART00000006971	21	38347301	38381576	-1	BC109428.1	1834	1431	RNASEQT00000003523	38346305	38381669	2923	1431	1765	RNASEQG00000003523	12	12	12	12	11	11	0	11	11	0	1586	0	1834	12	1431	12	2578	38347463	38347463	162	1158	unchanged
ENSDARG00000004587	ENSDART00000006983	5	25266093	25274878	1	BC076045.1	1789	1626	RNASEQT00000005803	25265392	25274877	2489	1626	2332	RNASEQG00000005803	15	15	15	15	14	13	1	14	13	1	3296	278	1788	15	1626	15	4262	25274720	25274720	158	157	trim	741	0
ENSDARG00000013443	ENSDART00000007021	17	21202307	21248268	-1	AF472614.1	2459	1521	RNASEQT00000001865	21202307	21248341	2532	1521	1691	RNASEQG00000001865	14	14	14	14	13	12	1	13	12	1	13247	625	2459	14	1521	14	31137	21203148	21203148	841	841	trim	16	0
ENSDARG00000006456	ENSDART00000007022	14	31228761	31235825	-1	BC062835.1	1394	1116	RNASEQT00000018243	31228761	31235996	1565	1116	1433	RNASEQG00000018243	6	6	6	6	5	5	0	5	5	0	2107	0	1394	6	1116	6	6921	31228893	31228893	132	132	trim	897	0
ENSDARG00000003841	ENSDART00000007029	25	14109371	14118870	1	BC077163.1	1900	831	RNASEQT00000010867	14108982	14118113	1532	831	1336	RNASEQG00000010867	8	8	8	8	7	5	0	7	5	0	368	0	1143	8	831	8	1572	14117917	14117917	953	196	unchanged
ENSDARG00000006011	ENSDART00000007030	4	16704247	16710376	-1	BC135056.1	1921	1419	RNASEQT00000021119	16702498	16711461	3652	1419	1766	RNASEQG00000021119	3	3	4	3	2	2	0	2	2	0	24	0	1605	2	1419	3	815	16704384	16704384	137	1886	unchanged
ENSDARG00000024184	ENSDART00000007053	12	34955719	34968835	1	BC075921.1	2009	1398	RNASEQT00000013575	34955527	34968834	2228	1431	1881	RNASEQG00000013575	12	11	12	11	11	10	0	10	10	0	1575	0	2008	11	1398	11	5923	34968487	34968487	348	347	trim	325	0
ENSDARG00000036558	ENSDART00000007058	9	42987452	43051266	1	BC163779.1	4266	4152	RNASEQT00000016530	43032841	43052545	4327	2646	2984	RNASEQG00000016530	41	41	32	30	40	36	0	40	36	0	13879	57	2872	31	2646	29	16355	43051202	43051202	64	1343	trim	14	0
ENSDARG00000006568	ENSDART00000007068	2	7602709	7613740	1	BC090829.1	1181	699	RNASEQT00000004273	7602725	7613748	1173	699	837	RNASEQG00000004273	5	4	5	4	4	4	0	3	3	0	28	0	1165	5	699	4	215	7613412	7613412	328	336	unchanged
ENSDARG00000011956	ENSDART00000007073	3	34755372	34766715	1	U67846.1	1162	753	RNASEQT00000021958	34755335	34766717	1232	753	965	RNASEQG00000021958	4	3	3	3	3	2	0	2	2	0	836	0	1162	2	753	3	2482	34766450	34766450	234	267	trim	207	0
ENSDARG00000018190	ENSDART00000007079	1	52632454	52644696	1	BC071461.1	1390	1026	RNASEQT00000008738	52632318	52647918	4748	1026	1304	RNASEQG00000008738	7	7	7	7	6	6	0	6	6	0	4144	0	1390	7	1026	7	15919	52644474	52644474	222	3444	trim	6	0
ENSDARG00000016112	ENSDART00000007091	14	1366159	1373201	1	BC124453.1	2331	2295	RNASEQT00000018478	1250113	1373226	4487	2019	4428	RNASEQG00000018478	3	3	16	2	2	2	0	2	2	0	43	0	2287	2	2019	1	1693	1373167	1373167	34	59	unchanged
ENSDARG00000014761	ENSDART00000007119	3	25950825	25953843	1	BC078328.1	1937	1629	RNASEQT00000022534	25950797	25956165	4287	0		No match	3	1	3	0	2	2	0	0	0	0	408	0	1937	3	0	0	2575	25953787		56	4287	unchanged
ENSDARG00000013393	ENSDART00000007122	23	19515849	19519133	-1	AY044456.1	1255	594	RNASEQT00000010076	19515773	19519222	1420	594	911	RNASEQG00000010076	4	4	4	4	3	3	0	3	3	0	424	0	1255	4	594	4	2274	19516282	19516282	433	509	unchanged
ENSDARG00000019326	ENSDART00000007170	3	39595408	39608007	1	BC067543.1	2275	1074	RNASEQT00000022016	39595201	39608003	2478	1074	1412	RNASEQG00000022016	11	10	11	10	10	10	0	9	9	0	7660	0	2271	11	1074	10	11509	39606937	39606937	1070	1066	trim	50	0
ENSDARG00000012899	ENSDART00000007204	11	6951981	6963392	-1	BC047834.1	1630	1407	RNASEQT00000000101	6951981	6963473	1711	1407	1611	RNASEQG00000000101	13	13	13	13	12	12	0	12	12	0	3270	0	1630	13	1407	13	4375	6952081	6952081	100	100	trim	58	0
ENSDARG00000013245	ENSDART00000007211	13	28803996	28822197	1	BC117666.1	2978	1050	RNASEQT00000011356	28803908	28823939	4808	1128	1236	RNASEQG00000011356	4	4	4	4	3	3	0	3	3	0	336	0	2978	4	1050	4	8322	28820367	28820367	1830	3572	trim	237	0
ENSDARG00000000175	ENSDART00000007226	3	24043391	24046066	1	BC065967.1	1826	1173	RNASEQT00000022507	24042911	24046265	2505	1230	1776	RNASEQG00000022507	2	2	2	2	1	1	0	1	1	0	79	0	1826	2	1173	2	1360	24045536	24045536	530	729	unchanged
ENSDARG00000009640	ENSDART00000007231	13	1014626	1023246	-1	AY648806.1	876	714	RNASEQT00000011129	1014632	1023292	916	714	804	RNASEQG00000011129	6	6	6	6	5	5	0	5	5	0	6819	1	870	6	714	6	17856	1014744	1014744	118	112	trim	703	0
ENSDARG00000003091	ENSDART00000007247	5	27857194	27865265	1	BC086743.1	2201	1407	RNASEQT00000005853	27857015	27865266	2390	1416	1775	RNASEQG00000005853	9	8	9	8	8	7	0	7	6	0	6957	2	2201	8	1407	7	24973	27864651	27864651	614	615	trim	158	0
ENSDARG00000028819	ENSDART00000007249	8	23396432	23412005	-1	BC154563.1	1994	1350	RNASEQT00000023127	23396432	23412132	2121	1350	1651	RNASEQG00000023127	13	12	13	12	12	11	1	11	10	1	2308	321	1994	13	1350	12	4496	23396902	23396902	470	470	trim	106	0
ENSDARG00000015076	ENSDART00000007262	1	47943241	47945954	1	BC095304.1	2354	1176	0	0	0	0	0	0	0	2	1	0	0	1	0	1	0	0	0	0	57	0	0	0	0	1009	47944832	0	1122	No match
ENSDARG00000003940	ENSDART00000007271	17	24546429	24553902	1	BC053148.1	1247	930	RNASEQT00000002412	24546305	24556275	2743	930	1245	RNASEQG00000002412	7	6	9	6	6	6	0	5	5	0	2054	0	1153	6	930	6	5287	24553776	24553776	126	1498	unchanged
ENSDARG00000017155	ENSDART00000007308	9	11656014	11662702	1	BC163661.1	1051	891	RNASEQT00000016174	11655875	11690864	6765	1329	1568	RNASEQG00000016174	3	3	4	4	2	2	0	2	2	0	32	0	961	2	861	2	243	11662642	11685667	60	5197	extend	0	2785	18
ENSDARG00000014657	ENSDART00000007310	7	20757858	20762495	1	BC151948.1	2030	1341	RNASEQT00000007079	20757645	20762495	2243	1341	1695	RNASEQG00000007079	11	11	11	11	10	9	1	10	9	1	519	127	2030	11	1341	11	1614	20761947	20761947	548	548	trim	33	0
ENSDARG00000038731	ENSDART00000007333	2	39435481	39463255	-1	BC076521.1	4656	936	RNASEQT00000004009	39288274	39463309	2482	936	1352	RNASEQG00000004009	7	7	8	7	6	6	0	6	6	0	767	3	1352	6	936	7	13290	39438839	39438839	3358	1130	trim	23	0
ENSDARG00000003189	ENSDART00000007346	22	40616328	40701704	1	BC045463.1	3147	2664	RNASEQT00000001221	40616210	40701696	3258	2895	3076	RNASEQG00000001221	26	24	25	24	25	24	0	23	22	0	20769	5	3139	24	2664	21	27638	40697666	40699948	420	182	trim	132	0
ENSDARG00000005092	ENSDART00000007365	7	39787315	39867899	1	BC063747.1	2920	2088	RNASEQT00000008023	39788074	39892817	2928	1875	2400	RNASEQG00000008023	19	19	18	14	18	15	0	18	15	0	205	0	1909	15	1389	11	382	39867285	39892289	614	528	unchanged
ENSDARG00000034883	ENSDART00000007373	24	5999274	6016461	-1	BC095655.1	3206	1506	RNASEQT00000019577	5999274	6016804	2575	1509	1971	RNASEQG00000019577	13	12	14	12	12	12	0	11	11	0	1970	0	2180	11	1506	12	8491	6000904	6000904	1630	604	trim	138	0
ENSDARG00000018627	ENSDART00000007392	9	23936211	23951706	-1	BC075927.1	1273	540	RNASEQT00000016316	23936211	23951984	1551	540	1126	RNASEQG00000016317	6	6	6	6	5	4	1	5	4	1	1074	219	1273	6	540	6	4470	23936636	23936636	425	425	trim	8	0
ENSDARG00000005643	ENSDART00000007398	3	27036866	27045042	-1	BC067644.1	1707	1377	RNASEQT00000021839	27036879	27045107	1759	1296	1444	RNASEQG00000021839	9	9	9	9	8	8	0	8	8	0	9952	0	1694	9	1296	9	9198	27037194	27037194	328	315	trim	19	0
ENSDARG00000021324	ENSDART00000007405	2	9949407	9958324	1	BC086725.1	1362	984	RNASEQT00000004299	9949388	9958455	1512	1182	1215	RNASEQG00000004299	6	5	6	6	5	5	0	4	4	0	515	0	1362	6	984	4	2242	9958158	9958158	166	297	unchanged
ENSDARG00000004956	ENSDART00000007412	21	29037709	29044105	1	BC097020.1	1107	597	RNASEQT00000002981	29037410	29044108	1409	597	910	RNASEQG00000002981	6	6	6	6	5	5	0	5	5	0	5921	1	1107	6	597	6	17553	29043609	29043609	496	499	trim	297	0
ENSDARG00000014496	ENSDART00000007465	16	14044265	14069829	-1	AY383562.1	2583	2130	RNASEQT00000012206	14044297	14069831	2553	2130	2245	RNASEQG00000012206	17	16	17	16	16	16	0	15	15	0	5015	0	2551	17	2130	16	10092	14044605	14044605	340	308	trim	408	0
ENSDARG00000005015	ENSDART00000007482	8	26561012	26569017	-1	BC057534.1	3404	1560	0	0	0	0	0	0	0	7	7	0	0	6	6	0	6	6	0	3118	2	0	0	0	0	22019	26562508	0	1496	No match
ENSDARG00000000369	ENSDART00000007497	9	14366567	14385080	-1	BC115291.1	1279	1011	RNASEQT00000016743	14365922	14385196	2040	1029	1168	RNASEQG00000016743	13	12	13	12	12	12	0	11	11	0	612	0	1279	13	1011	12	605	14367586	14367586	227	872	unchanged
ENSDARG00000052708	ENSDART00000007498	6	54780583	54799708	-1	BC086814.1	935	549	RNASEQT00000014699	54780583	54799782	1166	501	888	RNASEQG00000014699	8	6	8	5	7	6	0	5	4	0	1388	0	935	7	501	4	1581	54780972	54780972	278	278	trim	754	0
ENSDARG00000003449	ENSDART00000007500	13	4159816	4275297	1	BC049532.1	2976	2532	RNASEQT00000011660	4159132	4275728	4098	2391	3231	RNASEQG00000011660	23	23	22	22	22	20	1	22	20	1	631	13	2976	19	2384	19	1641	4275009	4274861	288	867	unchanged
ENSDARG00000008551	ENSDART00000007512	5	34506019	34508609	-1	BC059666.1	1179	447	RNASEQT00000006596	34472828	34508945	1229	447	770	RNASEQG00000006596	4	4	6	4	3	3	0	3	3	0	3103	1	919	2	447	4	17956	34506461	34506461	442	459	unchanged
ENSDARG00000012896	ENSDART00000007522	1	31396989	31433511	1	AF163310.1	2365	1959	RNASEQT00000008562	31396824	31434094	3113	1959	2155	RNASEQG00000008562	14	14	14	14	13	13	0	13	13	0	1721	0	2365	14	1959	14	4330	31433136	31433136	375	958	trim	153	0
ENSDARG00000004246	ENSDART00000007531	1	22558999	22682799	1	AF210321.1	4539	4539	RNASEQT00000008487	22557420	22684130	7449	4539	6118	RNASEQG00000008487	36	36	36	36	35	35	0	35	35	0	2990	3	4539	36	4539	36	5120	22682799	22682799	0	1331	trim	11	0
ENSDARG00000019405	ENSDART00000007545	6	45430455	45775272	1	BC124394.1	3446	3087	RNASEQT00000014605	45430099	45778132	6662	3087	3650	RNASEQG00000014605	23	22	23	22	22	22	0	21	21	0	1133	1	3446	23	3087	22	2342	45775120	45775120	152	3012	extend	0	1761	0
ENSDARG00000011701	ENSDART00000007555	5	25974812	25978599	1	BC083200.1	1421	786	RNASEQT00000005824	25974124	25978599	2109	1014	1743	RNASEQG00000005824	8	6	8	7	7	7	0	5	5	0	7274	0	1421	8	786	5	18349	25978233	25978233	366	366	trim	11	0
ENSDARG00000016235	ENSDART00000007576	16	34217159	34225222	-1	BC066514.1	1222	417	RNASEQT00000012436	34217159	34225363	1363	417	823	RNASEQG00000012436	4	4	4	4	3	3	0	3	3	0	1924	0	1222	4	417	4	6711	34217699	34217699	540	540	trim	239	0
ENSDARG00000004017	ENSDART00000007578	19	12607752	12640568	1	BC139535.1	1938	1161	RNASEQT00000024991	12607640	12640568	2050	1284	1305	RNASEQG00000024991	8	8	8	8	7	7	0	7	7	0	2353	0	1938	8	1161	8	8819	12639823	12639823	745	745	trim	303	0
ENSDARG00000016514	ENSDART00000007587	5	27865560	27877613	1	BC045397.1	1884	1179	RNASEQT00000006538	27865504	27892074	2251	1179	1497	RNASEQG00000006538	15	15	18	15	14	14	0	14	14	0	3108	0	1730	14	1179	15	4581	27877170	27877170	443	754	unchanged
ENSDARG00000025495	ENSDART00000007630	9	34011629	34014966	1	BC065689.1	2319	369	RNASEQT00000016450	34011410	34014949	2521	0		No match	2	1	2	0	1	1	0	0	0	0	170	0	2302	2	0	0	5262	34013494		1472	2521	trim	439	0
ENSDARG00000016231	ENSDART00000007638	4	2526450	2537300	1	BC095391.1	1414	723	RNASEQT00000020949	2528791	2537012	1243	723	889	RNASEQG00000020949	8	7	7	7	7	7	0	6	6	0	973	0	1087	6	723	7	2945	2536658	2536658	642	354	unchanged
ENSDARG00000077664	ENSDART00000007642	19	44011706	44023863	-1	BC092817.1	1913	1641	RNASEQT00000025252	44011700	44024029	2085	1641	1913	RNASEQG00000025252	11	11	11	11	10	10	0	10	10	0	18806	5	1913	11	1641	11	50990	44011872	44011872	166	172	trim	955	0
ENSDARG00000019302	ENSDART00000007649	22	11547557	11548650	-1	BC060921.1	764	444	RNASEQT00000001416	11546371	11548799	2099	0		No match	2	1	2	0	1	1	0	0	0	0	1716	0	764	2	0	0	14152	11547590		33	2099	unchanged
ENSDARG00000003127	ENSDART00000007675	21	31224720	31235071	-1	BC139588.1	2532	954	RNASEQT00000003005	31224720	31235202	2642	933	1446	RNASEQG00000003005	9	7	9	7	8	8	0	6	6	0	5668	1	2511	8	933	6	25363	31225916	31225916	1196	1196	trim	95	0
ENSDARG00000015869	ENSDART00000007688	20	31313483	31328976	1	BC171471.1	1754	1698	RNASEQT00000015468	31313264	31331104	4101	1698	1941	RNASEQG00000015468	9	9	9	9	8	8	0	8	8	0	292	0	1754	9	1698	9	914	31328944	31328944	32	2160	trim	307	0
ENSDARG00000011600	ENSDART00000007709	2	40095062	40266727	1	AF369381.1	3114	2772	RNASEQT00000004011	40095061	40271840	8228	2754	2773	RNASEQG00000004011	15	15	15	15	14	14	0	14	14	0	1235	0	3114	15	2754	15	3117	40266385	40266385	342	5455	extend	0	4505	0
ENSDARG00000002339	ENSDART00000007726	3	15094325	15101127	-1	BC083421.1	1276	882	RNASEQT00000022431	15093810	15101244	1908	882	1164	RNASEQG00000022431	10	9	10	9	9	9	0	8	8	0	4704	0	1276	10	882	9	3364	15094554	15094554	229	744	unchanged
ENSDARG00000012341	ENSDART00000007732	1	54448600	54473801	-1	BC076509.1	2621	2067	RNASEQT00000008762	54448600	54473893	2713	2067	2208	RNASEQG00000008762	20	20	20	20	19	19	0	19	19	0	15046	0	2621	20	2067	20	20402	54449105	54449105	505	505	trim	222	0
ENSDARG00000006044	ENSDART00000007735	20	31336813	31453287	-1	BC171381.1	1352	1224	RNASEQT00000015924	31335149	31454651	4380	1224	2695	RNASEQG00000015924	8	8	8	8	7	7	0	7	7	0	461	0	1352	8	1224	8	1204	31336834	31336834	21	1685	unchanged
ENSDARG00000016336	ENSDART00000007738	14	8427546	8443034	1	BC139553.1	1801	1515	RNASEQT00000018088	8425989	8443034	3358	1515	3213	RNASEQG00000018088	13	13	13	13	12	12	0	12	12	0	711	0	1801	13	1515	13	1331	8442889	8442889	145	145	trim	492	0
ENSDARG00000005463	ENSDART00000007744	20	13808913	13828562	1	BC063939.1	2978	1497	RNASEQT00000015298	13808548	13828562	3343	1497	2039	RNASEQG00000015298	2	2	2	2	1	1	0	1	1	0	110	0	2978	2	1497	2	16460	13827258	13827258	1304	1304	trim	156	0
ENSDARG00000005840	ENSDART00000007767	7	53229744	53249061	1	BC049435.1	1646	1287	RNASEQT00000007427	53229688	53249057	1698	1287	1403	RNASEQG00000007427	10	10	10	10	9	9	0	9	9	0	15921	0	1642	10	1287	10	27776	53248762	53248762	299	295	trim	108	0
ENSDARG00000017994	ENSDART00000007769	22	18610266	18611224	-1	BC171391.1	959	807	0	0	0	0	0	0	0	1	1	0	0	0	0	0	0	0	0	0	0	0	0	0	0	24	18610340	0	74	No match
ENSDARG00000004909	ENSDART00000007781	25	7801938	7811747	-1	BC051626.1	2237	1581	RNASEQT00000010440	7801938	7811841	2331	1581	1793	RNASEQG00000010440	13	13	13	13	12	12	0	12	12	0	19827	2	2237	13	1581	13	43942	7802476	7802476	538	538	trim	7	0
ENSDARG00000004696	ENSDART00000007783	6	40753453	40763110	-1	BC109397.1	2092	1731	RNASEQT00000014564	40753453	40764767	3749	1731	3587	RNASEQG00000014564	7	7	7	7	6	6	0	6	6	0	666	0	2092	7	1731	7	2834	40753615	40753615	162	162	trim	807	0
ENSDARG00000025375	ENSDART00000007789	9	29138177	29161591	1	BC046894.1	1995	1290	0	0	0	0	0	0	0	9	9	0	0	8	8	0	8	8	0	10916	4	0	0	0	0	42667	29160981	0	610	No match
ENSDARG00000014995	ENSDART00000007791	22	29931472	29935296	1	BC078267.1	1602	408	RNASEQT00000001171	29931215	29934733	1298	552	893	RNASEQG00000001171	4	3	3	2	3	2	0	2	1	0	1125	0	1039	2	408	1	7077	29934186	29934328	1110	405	trim	627	0
ENSDARG00000007180	ENSDART00000007797	18	4919832	4929655	-1	BC057442.1	2783	1038	RNASEQT00000004867	4919832	4929776	2966	1284	1568	RNASEQG00000004867	8	6	8	7	7	6	0	5	4	0	1643	74	2783	7	1038	4	15261	4921795	4921230	1582	1398	trim	29	0
ENSDARG00000010461	ENSDART00000007829	20	49077773	49081251	-1	AF253054.1	1149	924	RNASEQT00000016249	49077605	49081508	1574	924	1215	RNASEQG00000016249	2	2	2	2	1	1	0	1	1	0	6	0	1149	2	924	2	223	49077964	49077964	191	359	unchanged
ENSDARG00000013371	ENSDART00000007842	16	14545338	14561307	-1	BC125848.1	906	594	RNASEQT00000012213	14545417	14561293	813	594	732	RNASEQG00000012213	7	6	7	6	6	6	0	5	5	0	1541	0	813	7	594	6	1867	14545498	14545498	160	81	trim	170	0
ENSDARG00000001976	ENSDART00000007856	18	25437373	25529329	1	BC090698.1	1428	1212	RNASEQT00000005054	25434627	25529329	2168	1515	1952	RNASEQG00000005054	8	8	9	8	7	7	0	7	7	0	496	0	1428	7	1212	8	1305	25529113	25529113	216	216	trim	794	0
ENSDARG00000004169	ENSDART00000007906	19	16640154	16642742	-1	BC115338.1	926	447	RNASEQT00000025016	16640154	16642885	1069	447	656	RNASEQG00000025016	5	4	5	4	4	4	0	3	3	0	8843	1	926	5	447	4	27740	16640567	16640567	413	413	trim	2405	0
ENSDARG00000007141	ENSDART00000007913	7	40072185	40077255	1	BC071390.1	1627	1215	RNASEQT00000007321	40072054	40077250	1630	1284	1387	RNASEQG00000007321	11	10	11	11	10	9	1	9	8	1	16090	3291	1499	10	1215	9	28015	40077007	40077007	248	243	trim	161	0
ENSDARG00000004692	ENSDART00000007914	9	25248114	25251397	-1	BC086713.1	1260	636	RNASEQT00000016360	25237532	25252312	7564	0		No match	6	6	8	0	5	5	0	5	5	0	2260	0	1260	4	0	0	10845	25248531		417	7564	trim	66	0
ENSDARG00000034852	ENSDART00000007961	10	17490579	17514957	-1	BC081594.1	2225	1557	RNASEQT00000024142	17490579	17549252	2002	1464	1515	RNASEQG00000024142	18	18	17	17	17	17	0	17	17	0	10477	2	1932	16	1445	16	11997	17491066	17491066	487	487	trim	815	0
ENSDARG00000088424	ENSDART00000007982	9	57612045	57628299	-1	BC092936.1	2084	1290	RNASEQT00000016599	57612249	57625607	1660	1116	1153	RNASEQG00000016599	10	10	8	8	9	8	0	9	8	0	2206	4	1652	7	1116	7	5313	57612756	57612756	711	507	trim	208	0
ENSDARG00000004687	ENSDART00000007997	24	20933899	20940912	1	BC072706.1	1646	1257	RNASEQT00000019689	20933730	20940914	1817	1257	1431	RNASEQG00000019689	12	12	12	12	11	11	0	11	11	0	2248	0	1646	12	1257	12	4796	20940528	20940528	384	386	trim	969	0
ENSDARG00000010673	ENSDART00000008009	12	47709725	47754441	1	BC155346.1	2205	1776	RNASEQT00000013639	47709656	47756412	4245	1770	1846	RNASEQG00000013639	7	7	7	7	6	6	0	6	6	0	1593	0	2205	7	1770	7	9793	47754013	47754013	428	2399	extend	0	1872	0
ENSDARG00000008936	ENSDART00000008013	18	26732460	26742066	-1	BC076276.1	958	540	RNASEQT00000005062	26732460	26742252	1144	540	843	RNASEQG00000005062	6	6	6	6	5	5	0	5	5	0	8221	0	958	6	540	6	14242	26732761	26732761	301	301	trim	77	0
ENSDARG00000010445	ENSDART00000008035	18	14471615	14487299	-1	BC055655.1	1877	1083	RNASEQT00000004938	14471615	14487638	2216	1083	1559	RNASEQG00000004938	10	9	10	9	9	9	0	8	8	0	2212	0	1877	10	1083	9	5967	14472272	14472272	657	657	trim	3341	0
ENSDARG00000018423	ENSDART00000008038	11	25841028	25926777	1	BC045403.1	3644	2622	RNASEQT00000000242	25858678	25926783	4069	2622	3138	RNASEQG00000000242	21	20	21	20	20	20	0	19	19	0	1962	0	3606	20	2622	20	4722	25925852	25925852	925	931	trim	189	0
ENSDARG00000025507	ENSDART00000008047	24	39143734	39163675	1	BC045501.1	2889	2340	RNASEQT00000020311	39143491	39181287	3215	2337	2877	RNASEQG00000020311	14	11	17	11	13	12	1	10	9	1	1122	158	2886	12	2337	10	4499	39163423	39163423	252	338	unchanged
ENSDARG00000025346	ENSDART00000008062	25	22386839	22414497	1	BC054699.1	1506	1323	RNASEQT00000010569	22386375	22414497	1970	1374	1812	RNASEQG00000010569	12	12	12	12	11	10	1	11	10	1	2049	227	1506	12	1323	12	3699	22414339	22414339	158	158	trim	36	0
ENSDARG00000012467	ENSDART00000008077	20	3247530	3266716	-1	BC155551.1	2405	1500	RNASEQT00000015733	3247489	3266964	2694	1500	1967	RNASEQG00000015733	10	10	10	10	9	9	0	9	9	0	7470	1	2405	10	1500	10	21772	3248216	3248216	686	727	unchanged
ENSDARG00000017385	ENSDART00000008099	21	20499468	20502844	1	BC076193.1	936	528	RNASEQT00000003369	20499318	20503713	1098	528	820	RNASEQG00000003369	4	3	5	3	3	3	0	2	2	0	257	0	936	3	528	3	1425	20502578	20502578	266	278	unchanged
ENSDARG00000019747	ENSDART00000008115	20	1295835	1299481	1	AY279108.1	1366	1125	RNASEQT00000015709	1295730	1299477	1382	852	1087	RNASEQG00000015709	4	3	5	4	3	3	0	2	2	0	311	0	1277	3	852	2	4100	1299370	1299182	111	295	unchanged
ENSDARG00000017985	ENSDART00000008127	1	11690635	11694016	1	BC064302.1	1086	594	RNASEQT00000008397	11688985	11694011	2419	594	2076	RNASEQG00000008397	5	5	6	5	4	4	0	4	4	0	1950	0	968	4	594	5	6906	11693668	11693668	348	343	trim	100	0
ENSDARG00000005397	ENSDART00000008134	10	26765286	26798419	-1	BC129039.1	4088	2247	RNASEQT00000024212	26765294	26798423	4144	2319	2518	RNASEQG00000024212	12	11	13	12	11	11	0	10	10	0	2166	1	4080	12	2247	11	11763	26766920	26766920	1634	1626	trim	79	0
ENSDARG00000017634	ENSDART00000008140	20	34110217	34115331	-1	BC107838.1	1040	786	RNASEQT00000015493	34108942	34115411	2395	714	874	RNASEQG00000015493	4	4	4	3	3	3	0	3	3	0	3167	2	1040	4	714	2	7915	34110463	34110463	246	1521	extend	0	1156	1
ENSDARG00000006598	ENSDART00000008152	16	28781218	28787856	-1	BC124529.1	1780	1215	RNASEQT00000012365	28781213	28787966	1895	1215	1375	RNASEQG00000012365	12	12	12	12	11	11	0	11	11	0	1500	0	1780	12	1215	12	2787	28781733	28781733	515	520	trim	5	0
ENSDARG00000007960	ENSDART00000008158	14	6928661	6932434	1	BC048898.1	1868	1023	RNASEQT00000018536	6912764	6934896	6410	1023	4744	RNASEQG00000018536	9	7	22	7	8	8	0	6	6	0	89860	94	1490	7	1023	7	270094	6931404	6931404	768	1666	unchanged
ENSDARG00000042833	ENSDART00000008170	15	4408041	4439536	-1	BC067339.1	1691	1041	RNASEQT00000017158	4406838	4439577	2872	978	1291	RNASEQG00000017158	8	6	7	5	7	7	0	5	5	0	636	0	1628	7	978	5	3377	4408419	4408419	378	1581	extend	0	763	1
ENSDARG00000014179	ENSDART00000008174	23	27794426	27812304	-1	BC081652.1	2598	2355	RNASEQT00000009722	27794404	27812427	2743	2355	2542	RNASEQG00000009722	22	22	22	22	21	21	0	21	21	0	11448	0	2598	22	2355	22	11036	27794605	27794605	179	201	trim	257	0
ENSDARG00000014277	ENSDART00000008176	13	54046956	54049197	1	BC092695.1	961	729	RNASEQT00000012080	54046669	54049288	1339	729	1087	RNASEQG00000012080	3	3	3	3	2	2	0	2	2	0	555	1	961	3	729	3	3866	54049036	54049036	161	252	unchanged
ENSDARG00000013749	ENSDART00000008177	23	425794	435655	1	BC075893.1	1664	996	RNASEQT00000009471	425734	435655	1724	996	1093	RNASEQG00000009471	9	9	9	9	8	8	0	8	8	0	1813	0	1664	9	996	9	6457	435024	435024	631	631	trim	161	0
ENSDARG00000006508	ENSDART00000008215	8	11382774	11472652	1	BC081646.1	2646	1584	RNASEQT00000022999	11382664	11472659	2763	1584	1877	RNASEQG00000022999	15	13	15	13	14	14	0	12	12	0	1524	0	2646	15	1584	13	3975	11471773	11471773	879	886	trim	4	0
ENSDARG00000012485	ENSDART00000008224	6	59789014	59803930	1	BC078304.1	1732	1218	RNASEQT00000014731	59788946	59803932	1682	1218	1493	RNASEQG00000014731	9	8	10	8	8	8	0	7	7	0	7422	18	1612	8	1218	8	20565	59803623	59803623	307	189	trim	225	0
ENSDARG00000012177	ENSDART00000008273	15	8949080	8991666	-1	BC080219.1	2920	642	RNASEQT00000017639	8950298	8991743	1779	642	850	RNASEQG00000017639	8	7	8	7	7	7	0	6	6	0	963	0	1702	8	642	7	6517	8952029	8952029	2147	929	unchanged
ENSDARG00000005640	ENSDART00000008275	9	42108970	42113067	-1	BC085551.1	1270	1011	RNASEQT00000016983	42108849	42113122	1446	1011	1205	RNASEQG00000016983	2	1	2	1	1	1	0	0	0	0	24	0	1270	2	1011	1	3181	42109090	42109090	120	241	unchanged
ENSDARG00000011948	ENSDART00000008302	2	37265786	37353729	-1	EU447177.1	6189	4062	RNASEQT00000004532	37265533	37353894	6607	4062	5226	RNASEQG00000004532	21	21	21	21	20	20	0	20	20	0	5130	2	6189	21	4062	21	20037	37266914	37266914	1128	1381	unchanged
ENSDARG00000023040	ENSDART00000008306	20	27742321	27747976	1	AY577006.1	2968	2034	RNASEQT00000015429	27742227	27749705	3284	0		No match	2	1	3	0	1	1	0	0	0	0	104	2	2381	1	0	0	6258	27747217		759	3284	trim	270	0
ENSDARG00000003969	ENSDART00000008310	18	18209587	18365672	-1	BC047171.1	4436	3654	RNASEQT00000004987	18209588	18360350	3773	2955	3093	RNASEQG00000004987	27	26	21	21	26	24	0	25	23	0	4247	0	1169	4	489	4	27426	18210268	18210268	681	680	trim	377	0
ENSDARG00000016156	ENSDART00000008312	12	47985031	48039196	1	BC066405.1	1694	1140	RNASEQT00000013646	47984928	48039196	1797	1140	1426	RNASEQG00000013646	5	4	5	4	4	4	0	3	3	0	1420	2	1694	5	1140	4	14913	48038825	48038825	371	371	trim	388	0
ENSDARG00000060322	ENSDART00000008322	2	36626233	36635114	-1	BC167443.1	3138	1338	RNASEQT00000003973	36634957	36639745	2648	0	1586	No match	8	7	8	0	7	1	0	6	1	0	1	0	49	0	0	0	203	36627975	36636019	1742	1062	trim	649	0
ENSDARG00000016856	ENSDART00000008326	16	26909182	26912193	-1	BC067171.1	1144	1068	0	0	0	0	0	0	0	9	9	0	0	8	7	1	8	7	1	923	216	0	0	0	0	1522	26909229	0	47	No match
ENSDARG00000015134	ENSDART00000008351	15	14335341	14347221	1	BC163077.1	1403	1353	RNASEQT00000017222	14326667	14350513	2429	1455	1992	RNASEQG00000017222	14	14	18	16	13	13	0	13	13	0	1525	0	1368	12	1349	13	1657	14347190	14350076	31	437	trim	24	0
ENSDARG00000014106	ENSDART00000008355	17	9871856	9890018	-1	BC065947.1	2767	501	RNASEQT00000001766	9872012	9890070	2663	501	623	RNASEQG00000001766	4	4	4	4	3	3	0	3	3	0	1092	0	2611	4	501	4	22366	9874052	9874052	2196	2040	extend	0	887	1
ENSDARG00000014898	ENSDART00000008365	22	41975988	41980070	-1	BC083529.1	740	468	RNASEQT00000001237	41975988	41980430	1100	468	920	RNASEQG00000001237	4	4	4	4	3	3	0	3	3	0	3855	2	740	4	468	4	8158	41976168	41976168	180	180	trim	2594	0
ENSDARG00000016391	ENSDART00000008409	11	2064037	2083734	-1	BC051625.1	2956	1683	RNASEQT00000000472	2064611	2083892	2507	1650	1883	RNASEQG00000000472	14	13	14	13	13	12	0	12	11	0	307	0	2349	13	1650	12	1122	2065235	2065235	1198	624	unchanged
ENSDARG00000006567	ENSDART00000008416	4	2508973	2513542	1	BC152624.1	1171	921	RNASEQT00000020585	2508947	2513546	1201	924	1150	RNASEQG00000020585	6	6	6	6	5	5	0	5	5	0	625	0	1171	6	921	6	2256	2513495	2513495	47	51	trim	90	0
ENSDARG00000004874	ENSDART00000008421	7	72195886	72211300	1	BC054618.1	1325	1017	RNASEQT00000008214	72205628	72214779	4192	0		No match	13	12	5	0	12	10	0	11	9	0	897	0	524	4	0	0	2266	72209283		233	4192	unchanged
ENSDARG00000006052	ENSDART00000008424	22	15852242	15864057	-1	AF316598.1	2839	2421	RNASEQT00000001463	15852048	15864130	3106	2421	2728	RNASEQG00000001463	17	16	17	16	16	15	1	15	14	1	1066	62	2839	17	2421	16	2676	15852426	15852426	184	378	unchanged
ENSDARG00000055064	ENSDART00000008453	21	26053498	26058312	1	BC095755.1	771	477	RNASEQT00000002939	26050699	26058312	1059	573	765	RNASEQG00000002939	5	5	6	6	4	4	0	4	4	0	17774	4	771	4	477	4	36354	26058018	26058018	294	294	trim	1735	0
ENSDARG00000002210	ENSDART00000008456	6	26749829	26765891	-1	BC083536.1	1752	894	RNASEQT00000014947	26749791	26765974	1997	1266	1575	RNASEQG00000014947	11	8	11	11	10	9	0	7	6	0	696	0	1752	9	894	6	1968	26756992	26750213	632	422	unchanged
ENSDARG00000017174	ENSDART00000008469	1	30034195	30035940	-1	BC134899.1	1495	831	RNASEQT00000008548	30034380	30035992	1362	831	1003	RNASEQG00000008548	3	3	3	3	2	2	0	2	2	0	82	0	1310	3	831	3	810	30034739	30034739	544	359	trim	1799	0
ENSDARG00000003017	ENSDART00000008490	9	9025137	9028935	1	BC044416.1	1537	459	RNASEQT00000016141	8985627	9028935	4553	0	1686	No match	6	6	12	0	5	5	0	5	5	0	6147	4	1537	5	0	0	23900	9027951	9023806	984	2867	trim	1885	0
ENSDARG00000012505	ENSDART00000008535	16	14563923	14572490	1	BC098548.1	2062	1398	RNASEQT00000012214	14563642	14573413	3281	1413	2099	RNASEQG00000012214	11	11	11	11	10	9	1	10	9	1	7284	254	2062	10	1398	10	23140	14572231	14572231	259	1182	trim	252	0
ENSDARG00000005451	ENSDART00000008584	4	10528789	10542150	1	BC045493.1	2528	1347	RNASEQT00000020676	10528712	10542149	2604	1347	1517	RNASEQG00000020676	11	11	11	11	10	10	0	10	10	0	25633	3	2527	11	1347	11	90942	10541062	10541062	1088	1087	trim	74	0
ENSDARG00000025788	ENSDART00000008589	15	19367788	19373930	-1	BC044149.1	1878	588	RNASEQT00000017277	19367788	19374029	1977	588	877	RNASEQG00000017277	7	7	7	7	6	6	0	6	6	0	1827	0	1878	7	588	7	7862	19368888	19368888	1100	1100	trim	43	0
ENSDARG00000013056	ENSDART00000008590	20	27079134	27115750	-1	BC050497.1	2227	1191	RNASEQT00000015896	27079045	27115772	2338	1191	1552	RNASEQG00000015896	11	10	11	10	10	10	0	9	9	0	914	0	2227	11	1191	10	4318	27079831	27079831	697	786	unchanged
ENSDARG00000020758	ENSDART00000008594	11	31389244	31406540	1	BC124270.1	2135	906	RNASEQT00000000301	31389110	31406548	2277	906	1348	RNASEQG00000000301	4	4	4	4	3	3	0	3	3	0	210	1	2135	4	906	4	2080	31405619	31405619	921	929	trim	392	0
ENSDARG00000007863	ENSDART00000008595	19	20660250	20673094	1	BC054632.1	1407	894	RNASEQT00000025056	20660137	20673098	1524	894	1079	RNASEQG00000025056	9	9	9	9	8	8	0	8	8	0	15364	2	1407	9	894	9	30059	20672653	20672653	441	445	trim	34	0
ENSDARG00000017359	ENSDART00000008606	9	3515641	3531473	1	BC085548.1	1340	1029	RNASEQT00000016675	3515535	3531555	1528	1029	1301	RNASEQG00000016675	10	9	10	9	9	9	0	8	8	0	365	0	1340	10	1029	9	725	3531328	3531328	145	227	unchanged
ENSDARG00000010727	ENSDART00000008607	3	52183624	52277650	1	BC068374.1	2790	1596	RNASEQT00000022774	52183517	52277670	2917	1596	1896	RNASEQG00000022774	14	14	14	14	13	13	0	13	13	0	5028	0	2790	14	1596	14	5125	52276649	52276649	1001	1021	unchanged
ENSDARG00000017834	ENSDART00000008682	1	8536100	8562164	-1	BC047798.1	3547	1689	RNASEQT00000008362	8536105	8562298	3676	1689	1912	RNASEQG00000008362	19	10	19	10	18	18	0	9	9	0	17466	1	3542	19	1689	10	43193	8546080	8546080	1769	1764	trim	261	0
ENSDARG00000045834	ENSDART00000008692	4	5410351	5413086	1	BC135061.1	605	522	RNASEQT00000020990	5410310	5413088	648	522	592	RNASEQG00000020990	5	5	5	5	4	4	0	4	4	0	67	0	605	5	522	5	397	5413032	5413032	54	56	unchanged
ENSDARG00000011312	ENSDART00000008698	19	34182700	34195569	1	BC048033.1	2893	1479	RNASEQT00000025180	34182642	34195569	2951	1479	1654	RNASEQG00000025180	11	11	11	11	10	10	0	10	10	0	4344	2	2893	11	1479	11	27506	34194272	34194272	1297	1297	trim	239	0
ENSDARG00000016875	ENSDART00000008711	3	16342208	16366468	1	BC054932.1	2455	2103	RNASEQT00000021713	16341939	16367299	3555	2103	2435	RNASEQG00000021713	16	15	16	15	15	15	0	14	14	0	18606	0	2455	16	2103	15	16186	16366179	16366179	289	1120	trim	929	0
ENSDARG00000004204	ENSDART00000008737	9	34716507	34739632	-1	BC124091.1	2433	2247	RNASEQT00000016923	34715657	34739619	3270	2247	2326	RNASEQG00000016923	15	15	15	15	14	13	1	14	13	1	238	17	2420	15	2247	15	578	34716601	34716601	94	944	unchanged
ENSDARG00000017055	ENSDART00000008742	8	27755788	27771451	-1	BC085655.1	1259	1098	0	0	0	0	0	0	0	8	8	0	0	7	7	0	7	7	0	55	0	0	0	0	0	215	27755809	0	21	No match
ENSDARG00000013522	ENSDART00000008752	6	59719200	59726049	1	BC053122.1	2582	1893	RNASEQT00000015194	59719095	59726063	2701	1893	2104	RNASEQG00000015194	9	8	9	8	8	8	0	7	7	0	3633	7	2582	9	1893	8	20551	59725466	59725466	583	597	unchanged
ENSDARG00000016238	ENSDART00000008761	23	4305110	4310783	1	BC076281.1	1199	573	RNASEQT00000009511	4305041	4310794	1279	573	662	RNASEQG00000009511	3	3	3	3	2	2	0	2	2	0	1097	0	1199	3	573	3	11851	4310177	4310177	606	617	trim	135	0
ENSDARG00000006487	ENSDART00000008785	7	34680137	34684567	-1	BC071357.1	1758	765	RNASEQT00000007266	34680138	34686908	2727	792	2009	RNASEQG00000007266	7	7	9	8	6	6	0	6	6	0	31441	26	1494	5	765	6	104166	34680988	34680988	851	718	trim	2334	0
ENSDARG00000006691	ENSDART00000008807	5	34500603	34504802	1	BC049061.1	654	498	RNASEQT00000006597	34499361	34636488	585	498	539	RNASEQG00000006597	7	7	9	7	6	6	0	6	6	0	164937	14	543	5	498	7	181107	34504764	34504764	38	46	unchanged
ENSDARG00000021343	ENSDART00000008854	15	30459336	30474822	-1	BC054567.1	3419	1272	RNASEQT00000017386	30459336	30475027	3624	1272	1758	RNASEQG00000017386	9	9	9	9	8	8	0	8	8	0	4134	6	3419	9	1272	9	43637	30461202	30461202	1866	1866	trim	73	0
ENSDARG00000041345	ENSDART00000008864	7	65288994	65291982	-1	BC086959.1	1645	1242	RNASEQT00000008158	65288828	65291971	1800	1242	1371	RNASEQG00000008158	2	2	2	2	1	1	0	1	1	0	9	0	1634	2	1242	2	565	65289257	65289257	263	429	unchanged
ENSDARG00000011583	ENSDART00000008871	18	14692750	14715764	1	BC044558.1	2855	1821	RNASEQT00000004941	14692302	14715808	3347	1821	2476	RNASEQG00000004941	13	13	13	13	12	12	0	12	12	0	5938	0	2855	13	1821	13	18110	14714937	14714937	827	871	trim	303	0
ENSDARG00000005371	ENSDART00000008880	16	34467082	34473503	1	BC163279.1	2694	2604	RNASEQT00000012982	34467037	34473709	2945	2655	2673	RNASEQG00000012982	6	6	6	6	5	4	1	5	4	1	21	7	2694	6	2604	6	442	34473437	34473437	66	272	unchanged
ENSDARG00000003200	ENSDART00000008898	4	5681215	5704766	-1	GU937003.1	3378	1872	RNASEQT00000020624	5681215	5704792	3404	1872	2057	RNASEQG00000020624	9	8	9	8	8	8	0	7	7	0	1101	0	3378	9	1872	8	8819	5682562	5682562	1347	1347	trim	228	0
ENSDARG00000018492	ENSDART00000008906	13	17517439	17520016	1	BC044193.1	2186	1692	RNASEQT00000011257	17517318	17520220	2511	1692	2057	RNASEQG00000011257	2	2	2	2	1	1	0	1	1	0	357	0	2186	2	1692	2	11188	17519766	17519766	250	454	trim	3013	0
ENSDARG00000014340	ENSDART00000008920	16	49892216	49908891	1	BC055141.1	1630	651	RNASEQT00000012585	49891607	49911486	4834	651	1617	RNASEQG00000012585	5	5	5	5	4	4	0	4	4	0	1592	0	1630	5	651	5	6808	49908269	49908269	622	3217	extend	0	2857	56
ENSDARG00000021097	ENSDART00000008959	6	49734048	49752798	-1	BC045357.1	2014	1740	RNASEQT00000014647	49734042	49752866	2088	1740	1866	RNASEQG00000014647	15	15	15	15	14	14	0	14	14	0	4238	0	2014	15	1740	15	6396	49734264	49734264	216	222	trim	310	0
ENSDARG00000008035	ENSDART00000008968	22	42215462	42219525	-1	BC090461.1	1869	1101	RNASEQT00000001697	42199213	42230887	1968	774	1968	RNASEQG00000001697	8	8	13	5	7	5	1	7	5	1	134	30	640	4	610	3	1064	42216112	42199213	650	0	unchanged
ENSDARG00000009796	ENSDART00000008987	13	15770835	15851693	1	BC055591.1	2211	1617	RNASEQT00000011250	15770237	15861965	6202	1944	2616	RNASEQG00000011250	15	14	17	16	14	13	0	13	12	0	3739	1	1687	11	1613	10	5911	15851173	15858379	520	3586	extend	0	2004	0
ENSDARG00000006981	ENSDART00000008989	25	14094635	14100246	1	BC083263.1	1132	1077	RNASEQT00000010865	14094639	14103121	4003	1077	1082	RNASEQG00000010865	8	8	8	8	7	7	0	7	7	0	149	0	1128	8	1077	8	266	14100200	14100200	46	2921	unchanged
ENSDARG00000010591	ENSDART00000008994	5	21168837	21183492	-1	BC128811.1	2744	1653	RNASEQT00000006465	21168643	21183815	3261	1653	2377	RNASEQG00000006465	10	10	10	10	9	9	0	9	9	0	748	0	2744	10	1653	10	2360	21169527	21169527	690	884	unchanged
ENSDARG00000007276	ENSDART00000009028	5	27756150	27763331	-1	BC095070.1	895	606	RNASEQT00000005847	27756150	27763450	1014	810	936	RNASEQG00000005847	8	6	8	8	7	7	0	5	5	0	6060	2	895	8	606	5	15222	27756228	27756228	78	78	trim	681	0
ENSDARG00000017757	ENSDART00000009076	4	3214052	3224461	-1	BC068983.1	4747	3297	RNASEQT00000020956	3213946	3224635	5027	3297	3636	RNASEQG00000020956	11	10	11	10	10	10	0	9	9	0	1890	0	4747	11	3297	10	9384	3215337	3215337	1285	1391	unchanged
ENSDARG00000019113	ENSDART00000009081	8	20954295	20964837	1	BC067183.1	1412	651	RNASEQT00000023105	20954089	20964667	1448	651	987	RNASEQG00000023105	4	3	4	3	3	3	0	2	2	0	3537	0	1242	4	651	3	16720	20964206	20964206	631	461	trim	1899	0
ENSDARG00000012688	ENSDART00000009132	19	6042298	6045806	1	AY398352.1	1210	342	RNASEQT00000024902	6042183	6045694	1243	342	579	RNASEQG00000024902	5	4	4	4	4	3	0	3	3	0	22386	5	1128	3	342	4	99983	6045030	6045030	746	664	trim	955	0
ENSDARG00000006206	ENSDART00000009148	9	56377382	56378648	1	AY995217.1	996	996	RNASEQT00000016589	56377260	56379908	2378	1086	1118	RNASEQG00000016589	2	2	2	2	1	1	0	1	1	0	5	0	996	2	996	2	313	56378648	56378648	0	1260	trim	6	0
ENSDARG00000014685	ENSDART00000009164	20	39369612	39383888	1	BC096847.1	2350	1830	RNASEQT00000015554	39369569	39383857	2362	1830	2005	RNASEQG00000015554	11	10	11	10	10	10	0	9	9	0	6423	2	2319	11	1830	10	18046	39383500	39383500	388	357	trim	1504	0
ENSDARG00000003531	ENSDART00000009176	2	30454838	30462841	1	BC053177.1	1565	930	RNASEQT00000003909	30454519	30462841	2011	585	996	RNASEQG00000003909	10	10	9	6	9	7	1	9	7	1	16184	1677	1565	8	547	5	39929	30462298	30458557	543	1015	trim	12	0
ENSDARG00000006900	ENSDART00000009178	8	26912620	26931954	1	BC046905.1	2206	1545	RNASEQT00000023188	26912155	26932081	2798	1545	2177	RNASEQG00000023188	14	14	14	14	13	13	0	13	13	0	9942	0	2206	14	1545	14	18395	26931460	26931460	494	621	trim	12	0
ENSDARG00000003021	ENSDART00000009184	7	53111280	53165174	-1	BC055541.1	1913	1137	RNASEQT00000007425	53111289	53205075	5175	4131	4516	RNASEQG00000007425	11	11	40	39	10	10	0	10	10	0	2784	0	1682	10	1023	10	6943	53111948	53111948	668	659	trim	17	0
ENSDARG00000018903	ENSDART00000009194	3	61536570	61544471	1	BC053178.1	1427	966	RNASEQT00000022176	61536480	61544471	1517	966	1160	RNASEQG00000022176	4	4	4	4	3	3	0	3	3	0	4262	7	1427	4	966	4	16929	61544114	61544114	357	357	trim	148	0
ENSDARG00000018637	ENSDART00000009195	24	18993297	18995686	-1	BC076302.1	461	96	RNASEQT00000020075	18988873	19000116	784	207	622	RNASEQG00000020075	4	2	7	3	3	3	0	1	1	0	18693	0	461	2	96	1	31228	18993446	18993446	149	162	unchanged
ENSDARG00000007496	ENSDART00000009196	20	439305	459416	-1	BC056784.1	2525	2382	RNASEQT00000015205	439284	456612	2184	1857	2141	RNASEQG00000015205	19	19	16	14	18	16	0	18	16	0	2761	0	2152	15	1857	13	5529	439327	439327	22	43	trim	174	0
ENSDARG00000036451	ENSDART00000009200	12	21218837	21432123	1	BC048069.1	3104	1590	RNASEQT00000013888	21218743	21411128	1058	789	1058	RNASEQG00000013888	18	16	10	9	17	12	0	15	10	0	1080	0	207	3	161	2	5546	21429192	21411128	1339	0	unchanged
ENSDARG00000014709	ENSDART00000009214	6	18617933	18655110	1	BC085549.1	1430	654	RNASEQT00000014881	18617859	18656946	3340	654	1227	RNASEQG00000014881	6	5	6	5	5	5	0	4	4	0	677	0	1430	6	654	5	2314	18654833	18654833	277	2113	unchanged
ENSDARG00000011072	ENSDART00000009217	18	5588289	5620361	-1	BC085645.1	3730	2673	RNASEQT00000005282	5588489	5620510	3679	2673	2981	RNASEQG00000005282	26	26	26	26	25	25	0	25	25	0	2735	0	3530	26	2673	26	4167	5589187	5589187	898	698	unchanged
ENSDARG00000041022	ENSDART00000009223	22	32348659	32379616	-1	BC065341.1	2114	1413	RNASEQT00000001182	32348659	32382194	4692	1413	4069	RNASEQG00000001182	12	11	12	11	11	10	1	10	9	1	5432	334	2114	12	1413	11	12130	32349282	32349282	623	623	trim	58	0
ENSDARG00000004154	ENSDART00000009227	10	43279209	43286542	1	BC094965.1	1299	669	0	0	0	0	0	0	0	2	2	0	0	1	1	0	1	1	0	57	0	0	0	0	0	2670	43286052	0	490	No match
ENSDARG00000012723	ENSDART00000009234	21	26765065	26773351	1	BC157376.1	2978	1416	RNASEQT00000002951	26764931	26777052	6813	1416	1623	RNASEQG00000002951	4	3	4	3	3	3	0	2	2	0	1724	1	2978	4	1416	3	32288	26771862	26771862	1489	5190	extend	0	1911	0
ENSDARG00000018334	ENSDART00000009241	21	5737709	5745539	1	BC055640.1	453	372	RNASEQT00000003237	5737609	5759365	570	372	498	RNASEQG00000003237	4	4	5	4	3	3	0	3	3	0	78834	11	453	3	372	4	95080	5745484	5745484	55	72	unchanged
ENSDARG00000017143	ENSDART00000009256	16	56452412	56493086	-1	BC049140.2	2287	1896	RNASEQT00000013197	56452262	56493201	2552	1896	2106	RNASEQG00000013197	17	17	17	17	16	16	0	16	16	0	5178	4	2287	17	1896	17	6575	56452708	56452708	296	446	unchanged
ENSDARG00000001889	ENSDART00000009277	23	35760274	35762941	1	BC067554.1	1536	1356	RNASEQT00000009807	35760133	35762941	1677	1356	1566	RNASEQG00000009807	4	4	4	4	3	3	0	3	3	0	7641	8	1536	4	1356	4	93244	35762830	35762830	111	111	trim	569	0
ENSDARG00000018825	ENSDART00000009298	5	62566373	62586766	1	BC090900.1	1397	948	RNASEQT00000006159	62565606	62590693	3024	948	1948	RNASEQG00000006159	7	7	8	7	6	6	0	6	6	0	784	3	1397	6	948	7	2522	62586550	62586550	216	1076	trim	68	0
ENSDARG00000010957	ENSDART00000009301	12	11278308	11379178	-1	BC074066.1	2754	1644	RNASEQT00000013367	11278303	11379266	2832	1629	2084	RNASEQG00000013367	13	12	13	12	12	12	0	11	11	0	947	0	2739	12	1629	11	3890	11279051	11279051	743	748	trim	119	0
ENSDARG00000004541	ENSDART00000009319	12	37715592	37723041	1	BC152581.1	2130	1668	RNASEQT00000014042	37717740	37723254	1661	1332	1335	RNASEQG00000014042	13	11	10	9	12	11	0	10	9	0	61	0	1448	9	1332	8	148	37722734	37722734	113	326	unchanged
ENSDARG00000007294	ENSDART00000009321	12	20202861	20215436	-1	BC058049.1	3465	2349	RNASEQT00000013433	20202854	20215959	3995	2469	2874	RNASEQG00000013433	17	17	17	17	16	16	0	16	16	0	37058	4	3465	17	2349	17	108091	20203975	20203975	1114	1121	trim	185	0
ENSDARG00000009153	ENSDART00000009323	8	41676832	41686312	1	BC114293.1	2052	423	RNASEQT00000023815	41676796	41685138	914	456	459	RNASEQG00000023815	4	4	4	4	3	3	0	3	3	0	454	0	878	4	423	4	2696	41684683	41684683	1629	455	unchanged
ENSDARG00000006894	ENSDART00000009326	2	30593696	30601399	1	AF285173.1	1486	1134	RNASEQT00000004454	30597680	30601941	1621	813	860	RNASEQG00000004454	4	3	2	2	3	2	0	2	1	0	17	0	1079	1	813	1	189	30601180	30601180	219	761	unchanged
ENSDARG00000022456	ENSDART00000009337	23	22950687	22971986	1	BC059511.1	1774	1299	RNASEQT00000009665	22950589	22971986	1872	1299	1470	RNASEQG00000009665	12	11	12	11	11	11	0	10	10	0	25550	15	1774	12	1299	11	50945	22971584	22971584	402	402	trim	158	0
ENSDARG00000014101	ENSDART00000009343	13	40634259	40663950	-1	BC091832.1	2171	1716	RNASEQT00000011492	40632387	40664030	4123	1737	1796	RNASEQG00000011492	16	16	16	16	15	15	0	15	15	0	527	0	2171	16	1716	16	850	40634714	40634714	455	2327	extend	0	2021	5
ENSDARG00000014582	ENSDART00000009347	2	50675051	50696514	-1	BC045435.1	3093	2247	RNASEQT00000004093	50675051	50696611	3190	2247	2495	RNASEQG00000004093	13	12	13	12	12	12	0	11	11	0	3205	1	3093	13	2247	12	12358	50675746	50675746	695	695	trim	599	0
ENSDARG00000057159	ENSDART00000009360	22	16640667	16653102	1	BC095639.1	1642	897	RNASEQT00000001474	16640543	16653114	1778	897	1283	RNASEQG00000001474	10	10	10	10	9	9	0	9	9	0	425	0	1642	10	897	10	1190	16652619	16652619	483	495	unchanged
ENSDARG00000022599	ENSDART00000009382	6	13807021	13830916	1	BC044551.1	1686	1410	RNASEQT00000014335	13806865	13830936	1758	1425	1563	RNASEQG00000014335	15	14	15	15	14	14	0	13	13	0	4986	0	1594	14	1410	13	7697	13830741	13830741	175	195	trim	18	0
ENSDARG00000019636	ENSDART00000009385	14	31623352	31629132	1	BC071433.1	1471	924	RNASEQT00000018257	31623239	31629086	1538	924	1077	RNASEQG00000018257	9	8	9	8	8	8	0	7	7	0	5616	46	1425	9	924	8	11673	31628625	31628625	507	461	trim	335	0
ENSDARG00000033418	ENSDART00000009386	7	39657469	39668785	1	BC090748.1	2757	2748	RNASEQT00000007311	39657424	39669356	3201	2928	2982	RNASEQG00000007311	17	17	19	19	16	16	0	16	16	0	3321	2	2757	16	2748	16	6335	39668785	39669137	0	219	extend	0	3	0
ENSDARG00000012405	ENSDART00000009393	3	23512415	23528934	1	AY380817.1	5547	4344	RNASEQT00000021783	23511092	23528934	6254	3885	5208	RNASEQG00000021783	51	51	46	45	50	50	0	50	50	0	824040	14310	4931	44	3885	45	774667	23527731	23527731	1203	1046	trim	1319	0
ENSDARG00000017084	ENSDART00000009411	3	40279606	40282373	1	BC092952.1	709	435	RNASEQT00000022026	40274597	40290036	9417	0	8657	No match	4	4	11	0	3	3	0	3	3	0	15102	0	709	3	0	0	15969	40282189	40289276	184	760	trim	748	0
ENSDARG00000019986	ENSDART00000009457	1	18578766	18587294	-1	BC065431.1	1276	1011	RNASEQT00000008454	18578766	18587415	1367	1056	1245	RNASEQG00000008454	9	9	9	9	8	7	0	8	7	0	4561	0	1246	8	981	8	6880	18578888	18578888	122	122	trim	153	0
ENSDARG00000019998	ENSDART00000009464	22	16338200	16369810	-1	BC154234.1	1871	1164	RNASEQT00000001066	16261665	16372872	2085	1164	1458	RNASEQG00000001066	11	11	12	11	10	9	0	10	9	0	4775	1	1194	9	1116	10	7826	16338829	16262292	629	627	trim	127	0
ENSDARG00000009178	ENSDART00000009473	24	10855390	10859409	1	BC076430.1	949	813	RNASEQT00000019624	10855382	10859409	957	813	826	RNASEQG00000019624	8	8	8	8	7	7	0	7	7	0	904	0	949	8	813	8	1331	10859278	10859278	131	131	trim	21	0
ENSDARG00000008243	ENSDART00000009477	10	25963447	25979354	-1	AY391413.1	1913	1641	RNASEQT00000024202	25947485	25979434	5124	1641	1811	RNASEQG00000024202	15	15	29	15	14	14	0	14	14	0	41923	4	1913	14	1641	15	48125	25963629	25963629	182	3313	trim	78	0
ENSDARG00000021252	ENSDART00000009484	21	40509533	40528854	-1	BC155176.1	2258	1596	RNASEQT00000003095	40509533	40528850	2254	1596	1997	RNASEQG00000003095	15	14	15	14	14	13	1	13	12	1	33809	3603	2254	15	1596	14	55877	40509790	40509790	257	257	trim	345	0
ENSDARG00000009336	ENSDART00000009500	5	36167315	36193399	1	BC059529.1	2195	447	RNASEQT00000005947	36025246	36218606	12951	4917	5332	RNASEQG00000005947	6	6	52	31	5	5	0	5	5	0	7142	5	2139	4	178	2	138209	36191765	36180134	1634	7619	trim	1053	0
ENSDARG00000018985	ENSDART00000009507	5	64424434	64466430	1	BC045430.1	3195	990	RNASEQT00000006172	64412392	64465910	2778	645	1420	RNASEQG00000006172	9	9	14	7	8	8	0	8	8	0	6353	0	2235	8	645	6	39266	64464552	64464552	1878	1358	trim	167	0
ENSDARG00000018110	ENSDART00000009545	15	24783196	24817100	1	BC074067.1	5435	1995	RNASEQT00000017330	24783128	24830646	7784	1995	2213	RNASEQG00000017330	10	9	15	9	9	7	2	8	6	2	1228	487	5435	9	1995	9	32950	24813810	24813810	3290	5571	trim	5	0
ENSDARG00000075713	ENSDART00000009564	15	2171412	2177642	-1	BC065345.1	1595	900	0	0	0	0	0	0	0	5	5	0	0	4	3	1	4	3	1	148	35	0	0	0	0	1330	2171929	0	517	No match
ENSDARG00000021195	ENSDART00000009568	3	15885484	15901710	1	BC152296.1	1473	963	RNASEQT00000021707	15885015	15905237	5469	1080	2050	RNASEQG00000021707	7	7	7	7	6	6	0	6	6	0	2294	0	1473	7	963	7	4117	15901710	15901818	0	3419	trim	9	0
ENSDARG00000010701	ENSDART00000009591	9	23393302	23394086	1	AY738753.1	598	531	0	0	0	0	0	0	0	3	3	0	0	2	2	0	2	2	0	8322	1	0	0	0	0	26686	23394022	0	64	No match
ENSDARG00000018643	ENSDART00000009642	7	50327488	50333468	1	AF194333.1	2035	594	RNASEQT00000007400	50326964	50333468	2559	594	1239	RNASEQG00000007400	4	4	4	4	3	3	0	3	3	0	286	0	2035	4	594	4	4488	50332148	50332148	1320	1320	trim	3	0
ENSDARG00000005374	ENSDART00000009649	7	54392211	54408828	-1	BC163276.1	2200	2007	RNASEQT00000007439	54391473	54408914	2775	2007	2251	RNASEQG00000007439	18	18	19	18	17	17	0	17	17	0	2793	0	2200	17	2007	18	3567	54392246	54392246	35	524	trim	741	0
ENSDARG00000011553	ENSDART00000009682	8	26183349	26189123	-1	BC083308.1	958	759	RNASEQT00000023170	26163770	26191672	3943	759	3560	No match	7	7	27	7	6	6	0	6	6	0	39437	3	958	5	759	7	50839	26183460	26164153	111	383	trim	201	0
ENSDARG00000018461	ENSDART00000009687	24	7854993	7859869	1	BC045905.1	989	540	RNASEQT00000019593	7854880	7859864	1097	540	705	RNASEQG00000019593	5	4	5	4	4	4	0	3	3	0	5662	0	984	5	540	4	27408	7859472	7859472	397	392	trim	126	0
ENSDARG00000075963	ENSDART00000009689	19	7695416	7723630	1	BC074095.1	1875	1047	RNASEQT00000024920	7695357	7723635	1939	1047	1153	RNASEQG00000024920	8	7	8	7	7	7	0	6	6	0	77834	13	1875	8	1047	7	231378	7722474	7722474	781	786	trim	268	0
ENSDARG00000001634	ENSDART00000009695	7	20281571	20358028	-1	BC066766.1	4955	2424	RNASEQT00000007071	20282520	20358086	8138	2424	2656	RNASEQG00000007071	16	15	15	15	15	14	0	14	14	0	666	0	4006	14	2424	15	9730	20288002	20288002	2357	5482	extend	0	4915	158
ENSDARG00000016858	ENSDART00000009740	21	3658169	3689369	-1	BC065978.1	1578	1119	RNASEQT00000003207	3658152	3689894	2120	1119	1780	RNASEQG00000003207	4	4	4	4	3	3	0	3	3	0	615	0	1578	4	1119	4	4227	3658492	3658492	323	340	unchanged
ENSDARG00000014303	ENSDART00000009767	25	17949921	17971035	1	BC078425.1	3192	2316	RNASEQT00000010520	17949759	17971038	3390	2349	2904	RNASEQG00000010520	19	19	19	19	18	17	1	18	17	1	2440	124	3192	18	2316	18	6438	17970552	17970552	483	486	trim	48	0
ENSDARG00000020841	ENSDART00000009775	18	45748063	45753766	1	BC065641.1	1404	759	RNASEQT00000005184	45747984	45753766	1483	759	916	RNASEQG00000005184	5	5	5	5	4	4	0	4	4	0	3211	1	1404	5	759	5	18490	45753199	45753199	567	567	trim	460	0
ENSDARG00000005699	ENSDART00000009788	11	3586852	3597690	-1	BC044541.1	1970	1464	RNASEQT00000000065	3586829	3597728	1907	1464	1589	RNASEQG00000000065	12	12	13	12	11	11	0	11	11	0	16465	0	1846	11	1464	12	46100	3587147	3587147	295	318	trim	1436	0
ENSDARG00000007099	ENSDART00000009790	9	47606307	47616531	-1	BC044357.1	2355	1143	RNASEQT00000016558	47606307	47616633	2457	1143	1432	RNASEQG00000016558	3	2	3	2	2	2	0	1	1	0	11068	1199	2355	3	1143	2	271947	47607332	47607332	1025	1025	trim	1173	0
ENSDARG00000019897	ENSDART00000009838	10	42726956	42764554	-1	BC124075.1	2295	1356	RNASEQT00000024334	42726956	42764675	2416	1356	1926	RNASEQG00000024334	13	12	13	12	12	12	0	11	11	0	6100	0	2295	13	1356	12	13618	42727446	42727446	490	490	trim	127	0
ENSDARG00000017984	ENSDART00000009839	1	55833812	55838971	1	BC154532.1	1626	1080	RNASEQT00000008797	55833492	55838971	1798	1191	1361	RNASEQG00000008797	8	7	9	8	7	7	0	6	6	0	569	0	1626	7	1080	6	1214	55838534	55838534	437	437	extend	0	245	0
ENSDARG00000013653	ENSDART00000009859	11	7529272	7556372	-1	BC055171.1	2490	2184	RNASEQT00000000541	7529197	7556595	2788	2208	2457	RNASEQG00000000541	16	16	16	16	15	15	0	15	15	0	973	0	2490	16	2184	16	1594	7529528	7529528	256	331	unchanged
ENSDARG00000018688	ENSDART00000009909	4	6769178	6783407	1	BC171456.1	1363	1227	RNASEQT00000020632	6747614	6784361	2675	1227	1647	RNASEQG00000020632	4	4	5	4	3	3	0	3	3	0	531	0	1303	3	1227	4	3660	6783333	6783333	74	1028	trim	291	0
ENSDARG00000004714	ENSDART00000009938	7	53971791	54013558	-1	BC070024.1	4238	1602	RNASEQT00000008105	53971783	54165011	4913	2109	2371	RNASEQG00000008105	13	12	20	18	12	11	1	11	10	1	2216	447	4076	12	1542	11	17648	53976381	53976381	2534	2542	unchanged
ENSDARG00000018898	ENSDART00000009952	5	27325401	27338910	1	BC059673.1	2002	642	RNASEQT00000005841	27325102	27338900	2291	642	1069	RNASEQG00000005841	6	5	6	5	5	5	0	4	4	0	3175	0	1992	6	642	5	24958	27337678	27337678	1232	1222	trim	808	0
ENSDARG00000000489	ENSDART00000010019	14	34314309	34326089	-1	BC055632.1	2300	1404	RNASEQT00000018290	34314309	34326170	2381	1404	1566	RNASEQG00000018290	10	10	10	10	9	9	0	9	9	0	3160	29	2300	10	1404	10	15323	34315124	34315124	815	815	extend	0	11	1
ENSDARG00000026017	ENSDART00000010022	14	34566613	34588754	-1	BC054906.1	2810	2112	RNASEQT00000018715	34566443	34588783	3009	2112	2143	RNASEQG00000018715	21	21	21	21	20	19	1	20	19	1	917	25	2810	21	2112	21	1558	34567309	34567309	696	866	unchanged
ENSDARG00000015240	ENSDART00000010026	11	31037841	31106980	1	BC162960.1	3226	3120	RNASEQT00000000294	31036565	31107587	4266	3243	3597	RNASEQG00000000294	17	17	19	18	16	16	0	16	16	0	661	0	3226	16	3120	17	2492	31106918	31106918	62	669	trim	483	0
ENSDARG00000007665	ENSDART00000010040	3	126873	144503	1	BC044352.1	1839	1005	RNASEQT00000021579	126837	144507	1879	1005	1211	RNASEQG00000021579	8	7	8	7	7	7	0	6	6	0	2797	0	1839	8	1005	7	3944	143839	143839	664	668	trim	559	0
ENSDARG00000006609	ENSDART00000010048	22	20709449	20723616	-1	EF433291.1	2787	1194	RNASEQT00000001106	20708966	20723596	3250	1194	1686	RNASEQG00000001106	11	11	11	11	10	10	0	10	10	0	6806	0	2767	11	1194	11	30267	20710530	20710530	1081	1564	trim	153	0
ENSDARG00000007409	ENSDART00000010052	13	30795800	30799397	1	BC081399.1	1002	570	RNASEQT00000011385	30795740	30799399	1064	570	724	RNASEQG00000011385	6	6	6	6	5	4	1	5	4	1	726	83	1002	6	570	6	2577	30799059	30799059	338	340	trim	1398	0
ENSDARG00000006811	ENSDART00000010068	12	16077369	16084575	-1	BC075996.1	1576	927	RNASEQT00000013399	16077373	16084610	1607	927	1276	RNASEQG00000013399	7	7	7	7	6	6	0	6	6	0	1706	0	1572	7	927	7	5912	16077704	16077704	335	331	trim	154	0
ENSDARG00000004665	ENSDART00000010079	5	2513293	2521203	-1	AY648749.1	2342	1953	RNASEQT00000005643	2513293	2521672	2811	1953	2563	RNASEQG00000005643	9	8	9	8	8	8	0	7	7	0	32019	12	2342	9	1953	8	133541	2513541	2513541	248	248	trim	51	0
ENSDARG00000009250	ENSDART00000010081	16	53740850	53755225	-1	BC045971.1	1308	765	RNASEQT00000012610	53740844	53755299	1388	765	855	RNASEQG00000012610	7	6	7	6	6	6	0	5	5	0	5778	7	1308	7	765	6	20283	53741639	53741639	527	533	trim	45	0
ENSDARG00000007804	ENSDART00000010092	1	187476	212959	-1	BC053117.1	2459	1947	RNASEQT00000008857	187314	213050	2712	1947	2108	RNASEQG00000008857	15	15	15	15	14	14	0	14	14	0	2955	0	2459	15	1947	15	7568	187918	187918	442	604	unchanged
ENSDARG00000018010	ENSDART00000010104	19	44211927	44220513	1	BC067548.1	1496	1191	RNASEQT00000025254	44211627	44220512	1795	1191	1503	RNASEQG00000025254	7	7	7	7	6	6	0	6	6	0	4355	0	1495	7	1191	7	7248	44220220	44220220	293	292	trim	54	0
ENSDARG00000006838	ENSDART00000010119	23	16054328	16082265	-1	BC075885.1	2026	1392	RNASEQT00000010042	16054290	16082504	2303	1392	1782	RNASEQG00000010042	8	7	8	7	7	7	0	6	6	0	338	0	2026	8	1392	7	1236	16054811	16054811	483	521	unchanged
ENSDARG00000003899	ENSDART00000010126	24	21731293	21740059	-1	BC079487.1	1692	1278	RNASEQT00000020101	21722947	21740139	2996	1287	1664	RNASEQG00000020101	5	4	8	4	4	4	0	3	3	0	169	0	1692	4	1278	4	1210	21731401	21731401	108	1332	unchanged
ENSDARG00000018521	ENSDART00000010128	21	39039018	39040658	1	BC162353.1	1641	939	RNASEQT00000003533	39038963	39053176	1205	0	1053	No match	1	1	2	0	0	0	0	0	0	0	1	0	52	0	0	0	43	39040248	39053024	410	152	unchanged
ENSDARG00000013950	ENSDART00000010129	18	14274714	14277797	-1	BC097196.1	930	744	RNASEQT00000004933	14274714	14277812	945	744	930	RNASEQG00000004933	3	2	3	2	2	2	0	1	1	0	169	0	930	3	744	2	1081	14274729	14274729	15	15	trim	2903	0
ENSDARG00000002768	ENSDART00000010144	12	18777981	18780047	-1	BC093135.1	704	330	RNASEQT00000013418	18777976	18780221	883	330	651	RNASEQG00000013418	5	4	5	4	4	4	0	3	3	0	535350	117	704	5	330	4	450379	18778208	18778208	227	232	trim	165	0
ENSDARG00000007982	ENSDART00000010177	18	37192312	37197540	1	BC056601.1	1838	1386	0	0	0	0	0	0	0	2	2	0	0	1	1	0	1	1	0	134	0	0	0	0	0	2343	37197326	0	214	No match
ENSDARG00000027423	ENSDART00000010189	18	20663405	20827568	-1	BC163723.1	4321	4218	RNASEQT00000005412	20662167	20828747	6738	4218	5461	RNASEQG00000005412	21	21	21	21	20	20	0	20	20	0	1321	0	4321	21	4218	21	3759	20663444	20663444	39	1277	unchanged
ENSDARG00000031246	ENSDART00000010193	21	28905359	28913008	-1	BC150223.1	1648	720	RNASEQT00000002977	28905359	28925911	4258	0	1453	No match	6	5	16	0	5	5	0	4	4	0	897	0	1648	5	0	0	3291	28907652	28914166	858	2805	trim	3	0
ENSDARG00000013813	ENSDART00000010199	5	27726997	27738495	-1	BC095693.1	1022	576	RNASEQT00000005846	27725045	27738759	3217	555	983	RNASEQG00000005846	6	6	6	6	5	5	0	5	5	0	652	0	1001	5	555	5	2475	27727279	27727279	282	2234	extend	0	1497	0
ENSDARG00000008706	ENSDART00000010211	1	41846743	41852592	1	BC059597.1	1139	396	RNASEQT00000008625	41846432	41852592	1051	450	853	RNASEQG00000008625	4	4	5	5	3	3	0	3	3	0	9423	1	740	3	382	3	36305	41851941	41852394	651	198	trim	231	0
ENSDARG00000020596	ENSDART00000010257	2	8447849	8473078	-1	BC083228.1	2049	1788	RNASEQT00000003696	8447451	8473105	2474	1788	1929	RNASEQG00000003696	16	15	16	15	15	15	0	14	14	0	2735	4	2049	16	1788	15	4130	8447996	8447996	147	545	trim	7715	0
ENSDARG00000010052	ENSDART00000010258	23	14944541	15049091	-1	BC044139.1	2344	1116	RNASEQT00000009591	14944541	15101980	2458	1116	1343	RNASEQG00000009591	16	15	16	15	15	13	1	14	13	1	5752	432	2253	15	1116	15	17390	14945656	14945656	1115	1115	trim	22	0
ENSDARG00000008263	ENSDART00000010270	23	18273821	18285607	1	BC155330.1	1942	1611	RNASEQT00000010056	18273731	18285613	2038	1611	1753	RNASEQG00000010056	10	10	10	10	9	9	0	9	9	0	252	0	1942	10	1611	10	777	18285328	18285328	279	285	unchanged
ENSDARG00000014532	ENSDART00000010271	20	52069511	52092525	1	BC059647.1	1374	912	RNASEQT00000015638	52069457	52093550	2453	912	1118	RNASEQG00000015638	10	10	10	10	9	9	0	9	9	0	4003	0	1374	10	912	10	5707	52092215	52092215	310	1335	trim	338	0
ENSDARG00000011141	ENSDART00000010274	17	37067121	37104167	-1	AY987371.1	3472	1695	RNASEQT00000002019	37067121	37104169	3474	1695	1857	RNASEQG00000002019	13	12	13	12	12	12	0	11	11	0	3153	0	3472	13	1695	12	11751	37068738	37068738	1617	1617	extend	0	796	1
ENSDARG00000021149	ENSDART00000010282	21	20520410	20528388	-1	AF298898.1	1608	834	RNASEQT00000002881	20520410	20528671	1891	834	1504	RNASEQG00000002881	4	4	4	4	3	3	0	3	3	0	1919	0	1608	4	834	4	10994	20520797	20520797	387	387	trim	169	0
ENSDARG00000017316	ENSDART00000010286	13	15716254	15747560	-1	BC097176.1	2635	1416	RNASEQT00000011754	15715400	15753269	3439	1536	1584	RNASEQG00000011754	6	4	5	5	5	4	0	3	3	0	427	0	2422	3	1416	3	5058	15717255	15717255	969	1855	unchanged
ENSDARG00000005924	ENSDART00000010293	20	27401395	27411249	-1	BC134976.1	2307	1176	RNASEQT00000015900	27401143	27411340	2045	1176	1432	RNASEQG00000015900	5	4	6	4	4	4	0	3	3	0	1956	2	1702	4	1176	4	21717	27402361	27402361	966	613	unchanged
ENSDARG00000013333	ENSDART00000010311	9	24773855	24780576	-1	BC059660.1	1271	1068	RNASEQT00000016817	24773423	24780627	1754	1068	1171	RNASEQG00000016817	10	10	10	10	9	9	0	9	9	0	22201	1	1271	10	1068	10	18189	24774006	24774006	151	583	unchanged
ENSDARG00000006219	ENSDART00000010319	11	4021616	4031802	1	BC075773.1	1622	1566	RNASEQT00000000072	4020370	4033834	4014	1686	2988	RNASEQG00000000072	14	14	15	15	13	13	0	13	13	0	9739	1	1622	13	1566	13	9932	4031802	4032808	0	1026	extend	0	647	0
ENSDARG00000019595	ENSDART00000010322	7	58094145	58098562	-1	BC124224.1	855	639	RNASEQT00000008127	58093507	58098549	1480	639	741	RNASEQG00000008127	2	1	2	1	1	1	0	0	0	0	54	0	842	2	639	1	928	58094246	58094246	101	739	unchanged
ENSDARG00000010270	ENSDART00000010325	25	29139614	29142796	1	BC124439.1	2068	1290	RNASEQT00000010611	29139608	29142796	2074	1290	1612	RNASEQG00000010611	4	4	4	4	3	3	0	3	3	0	228	0	2068	4	1290	4	985	29142334	29142334	462	462	trim	513	0
ENSDARG00000019062	ENSDART00000010329	20	34176294	34180204	1	AY394953.1	1631	453	RNASEQT00000015494	34176271	34180216	1577	303	533	RNASEQG00000015494	4	4	5	3	3	2	1	3	2	1	928	831	1542	3	303	2	15766	34179172	34179172	1032	1044	trim	197	0
ENSDARG00000004260	ENSDART00000010332	21	21076607	21094266	1	BC154032.1	2155	2142	RNASEQT00000002885	21076530	21095040	2680	2388	2478	RNASEQG00000002885	18	18	19	19	17	17	0	17	17	0	213	0	2155	17	2142	17	458	21094266	21094838	0	202	trim	21	0
ENSDARG00000021480	ENSDART00000010370	2	20374342	20382234	1	BC151905.1	1660	1398	RNASEQT00000004355	20374193	20384167	2539	2079	2490	RNASEQG00000004355	7	7	8	8	6	6	0	6	6	0	444	1	1657	5	1395	5	1735	20382234	20384118	0	49	unchanged
ENSDARG00000014794	ENSDART00000010395	3	59035104	59052830	1	BC076480.1	1632	1380	RNASEQT00000022151	59035053	59052830	1683	1383	1474	RNASEQG00000022151	14	14	14	14	13	13	0	13	13	0	23848	6	1632	14	1380	14	14080	59052621	59052621	209	209	trim	586	0
ENSDARG00000011611	ENSDART00000010420	10	43887095	43905962	1	BC046069.1	2511	1131	RNASEQT00000024347	43887060	43905962	2546	1131	1312	RNASEQG00000024347	11	11	11	11	10	10	0	10	10	0	7328	2	2511	11	1131	11	28109	43904728	43904728	1234	1234	trim	69	0
ENSDARG00000041599	ENSDART00000010452	18	17087697	17120836	1	BC074034.1	2835	1275	RNASEQT00000004971	17087629	17120827	2894	1275	1454	RNASEQG00000004971	13	12	13	12	12	12	0	11	11	0	1900	0	2826	13	1275	12	7096	17119387	17119387	1449	1440	trim	2	0
ENSDARG00000021924	ENSDART00000010477	3	26908018	26911371	-1	BC056709.1	2356	1932	RNASEQT00000021835	26908018	26915678	4612	0		No match	2	1	3	0	1	1	0	0	0	0	131	0	2350	1	0	0	3778	26908318		300	4612	trim	62	0
ENSDARG00000003058	ENSDART00000010494	20	30604908	30636080	1	BC071450.1	1637	1536	RNASEQT00000015918	30604880	30670196	3416	1554	1600	RNASEQG00000015918	19	19	22	19	18	18	0	18	18	0	4262	0	1564	17	1536	18	3363	30635997	30635997	83	1816	unchanged
ENSDARG00000020475	ENSDART00000010495	25	13838094	13903307	1	BC063239.1	2880	648	RNASEQT00000010485	13837751	13903312	3228	648	1504	RNASEQG00000010485	5	4	5	4	4	4	0	3	3	0	582	0	2880	5	648	4	7391	13899845	13899845	1719	1724	trim	254	0
ENSDARG00000014805	ENSDART00000010496	17	15446841	15452914	-1	BC079524.1	1156	843	RNASEQT00000001820	15446843	15452983	1223	843	949	RNASEQG00000001820	6	5	6	5	5	5	0	4	4	0	1755	0	1154	6	843	5	3616	15447117	15447117	276	274	trim	32	0
ENSDARG00000011434	ENSDART00000010507	17	14728067	14730346	1	BC057422.1	2280	846	RNASEQT00000001806	14727964	14737038	3097	1107	1430	RNASEQG00000001806	1	1	2	2	0	0	0	0	0	0	0	0	1027	0	807	0	810	14729132	14735371	1214	1667	extend	0	1103	0
ENSDARG00000011026	ENSDART00000010512	14	31837327	31841081	-1	BC076360.1	815	495	0	0	0	0	0	0	0	4	4	0	0	3	3	0	3	3	0	391	0	0	0	0	0	1193	31837597	0	270	No match
ENSDARG00000013274	ENSDART00000010517	13	12540691	12551134	1	BC085374.1	1540	651	RNASEQT00000011233	12540587	12550931	1441	651	764	RNASEQG00000011233	7	7	7	7	6	6	0	6	6	0	2048	0	1337	7	651	7	7419	12550254	12550254	880	677	trim	1111	0
ENSDARG00000019815	ENSDART00000010521	9	15639035	15700871	-1	AF081128.1	8264	7434	RNASEQT00000016216	15639036	15701249	8569	7362	7830	RNASEQG00000016216	51	51	47	47	50	45	0	50	45	0	14160	29	8182	42	7353	42	32772	15639775	15639775	740	739	trim	503	0
ENSDARG00000009113	ENSDART00000010550	20	14725688	14730267	1	BC068421.1	1566	882	RNASEQT00000015306	14725571	14730263	1679	882	1020	RNASEQG00000015306	2	1	2	1	1	1	0	0	0	0	118	0	1562	2	882	1	2522	14729604	14729604	663	659	trim	586	0
ENSDARG00000017928	ENSDART00000010564	20	20968853	20973489	-1	BC090820.1	1390	1059	RNASEQT00000015360	20968853	20974311	2212	1059	1980	RNASEQG00000015360	7	7	7	7	6	6	0	6	6	0	1155	2	1390	7	1059	7	3829	20969085	20969085	232	232	trim	436	0
ENSDARG00000020371	ENSDART00000010569	12	3895083	3904611	1	BC128866.1	1822	1020	RNASEQT00000013739	3895078	3903093	1212	1020	1128	RNASEQG00000013739	7	6	6	6	6	5	0	5	5	0	182	1	1137	5	1020	6	1217	3903009	3903009	699	84	unchanged
ENSDARG00000016623	ENSDART00000010580	19	25368519	25374883	1	BC124795.1	2921	1272	RNASEQT00000025589	25364092	25378280	3332	1272	2016	RNASEQG00000025589	12	12	14	12	11	11	0	11	11	0	5959	0	2693	10	1272	12	26558	25373344	25373344	1539	1316	unchanged
ENSDARG00000021345	ENSDART00000010584	20	27413746	27419865	-1	BC155639.1	1956	1080	0	0	0	0	0	0	0	3	3	0	0	2	2	0	2	2	0	20	0	0	0	0	0	502	27414540	0	794	No match
ENSDARG00000009557	ENSDART00000010591	8	51076270	51107959	-1	BC050515.1	1995	1341	RNASEQT00000023358	51076270	51108038	2073	1341	1597	RNASEQG00000023358	13	12	13	12	12	11	0	11	11	0	3187	1	1994	12	1341	12	6467	51076746	51076746	476	476	trim	278	0
ENSDARG00000005989	ENSDART00000010604	8	19808089	19867056	-1	BC065335.1	4575	2415	RNASEQT00000023093	19808089	19838667	4732	2325	2668	RNASEQG00000023093	19	18	18	18	18	17	0	17	17	0	1362	1	4310	16	2280	17	8443	19810153	19810153	2030	2064	trim	215	0
ENSDARG00000020031	ENSDART00000010615	2	26145600	26149296	-1	BC075960.1	1265	648	RNASEQT00000003862	26145601	26149448	1416	648	946	RNASEQG00000003862	3	3	3	3	2	2	0	2	2	0	345	0	1264	3	648	3	3006	26146071	26146071	471	470	trim	537	0
ENSDARG00000001777	ENSDART00000010626	10	1623969	1663150	-1	BC045339.1	4399	4176	RNASEQT00000023988	1622364	1663183	6037	4176	4337	RNASEQG00000023988	34	33	34	33	33	32	0	32	31	0	8602	1	4396	32	4173	31	16437	1624064	1624064	95	1700	trim	94	0
ENSDARG00000011876	ENSDART00000010632	1	36373720	36410468	1	BC167440.1	2660	1269	RNASEQT00000008587	36373637	36410468	2743	1269	1596	RNASEQG00000008587	8	7	8	7	7	7	0	6	6	0	1029	2	2660	8	1269	7	7946	36409321	36409321	1147	1147	trim	355	0
ENSDARG00000008363	ENSDART00000010634	16	31846295	31847603	1	BC092680.1	1012	687	RNASEQT00000012409	31846120	31848255	1713	687	986	RNASEQG00000012409	3	3	4	3	2	2	0	2	2	0	6664	2	1012	2	687	3	29327	31847402	31847402	201	727	trim	462	0
ENSDARG00000011510	ENSDART00000010647	23	21815650	21829148	-1	BC066628.1	2872	1488	RNASEQT00000009656	21815650	21829327	3436	1488	2193	RNASEQG00000009656	13	12	13	12	12	12	0	11	11	0	16216	3	2872	12	1488	12	75051	21816893	21816893	1243	1243	trim	488	0
ENSDARG00000014556	ENSDART00000010658	24	43916745	43926516	1	BC053300.1	1280	1143	RNASEQT00000020421	43917939	43927072	2096	1248	1491	RNASEQG00000020421	7	6	7	7	6	6	0	5	5	0	3048	1	1193	6	1143	5	10010	43926467	43926467	49	605	unchanged
ENSDARG00000013830	ENSDART00000010697	23	9615429	9658843	1	BC045502.1	2273	1419	RNASEQT00000009563	9615417	9661091	4533	1419	1641	RNASEQG00000009563	14	13	14	13	13	13	0	12	12	0	6170	0	2273	14	1419	13	14606	9658199	9658199	644	2892	trim	353	0
ENSDARG00000004925	ENSDART00000010706	25	21968647	22178039	-1	BC078193.1	817	552	RNASEQT00000010567	21968645	22178087	867	552	640	RNASEQG00000010567	6	5	6	5	5	5	0	4	4	0	1029	0	817	6	552	5	1911	21968872	21968872	225	227	trim	11	0
ENSDARG00000010941	ENSDART00000010739	16	9439928	9462711	1	BC095667.1	2535	1737	RNASEQT00000012163	9439852	9466621	6521	1758	2084	RNASEQG00000012163	3	2	3	2	2	2	0	1	1	0	113	0	2535	3	1737	2	3138	9462184	9462184	527	4437	extend	0	3170	0
ENSDARG00000043055	ENSDART00000010785	22	10823863	10844192	1	BC045310.1	2219	891	RNASEQT00000001008	10823794	10845401	3498	1458	1714	RNASEQG00000001008	13	10	12	12	12	11	0	9	8	0	3378	0	2219	11	891	7	11913	10837092	10843617	1141	1784	trim	77	0
ENSDARG00000012588	ENSDART00000010792	16	56808914	56832953	1	BC044533.1	1988	1398	RNASEQT00000012626	56808082	56832941	2808	1398	2372	RNASEQG00000012626	13	13	13	13	12	12	0	12	12	0	5749	1	1976	13	1398	13	11529	56832505	56832505	448	436	trim	360	0
ENSDARG00000012788	ENSDART00000010813	18	44759027	44762463	-1	AF052245.1	2504	1326	RNASEQT00000005178	44759029	44762725	2764	1326	1655	RNASEQG00000005178	2	2	2	2	1	1	0	1	1	0	151	2	2502	2	1326	2	12887	44760138	44760138	1111	1109	trim	274	0
ENSDARG00000017675	ENSDART00000010821	18	14205671	14219377	1	BC065322.1	2244	2058	RNASEQT00000004930	14205583	14219377	2332	2112	2204	RNASEQG00000004930	17	16	17	17	16	15	1	15	14	1	6630	372	2244	17	2058	15	11094	14219249	14219249	128	128	trim	3	0
ENSDARG00000019222	ENSDART00000010862	19	8118349	8128669	1	BC076182.1	851	651	RNASEQT00000025437	8118075	8128677	1133	651	1013	RNASEQG00000025437	6	5	6	5	5	5	0	4	4	0	2374	0	851	6	651	5	4262	8128557	8128557	112	120	unchanged
ENSDARG00000021383	ENSDART00000010881	15	42703278	42739302	1	BC049312.1	2398	2238	RNASEQT00000017478	42703251	42739298	2421	2238	2319	RNASEQG00000017478	19	19	19	19	18	18	0	18	18	0	1922	0	2394	19	2238	19	3294	42739196	42739196	106	102	trim	101	0
ENSDARG00000008131	ENSDART00000010894	1	46691464	46693213	1	BC154495.1	1750	1023	0	0	0	0	0	0	0	1	1	0	0	0	0	0	0	0	0	0	0	0	0	0	0	1611	46692697	0	516	No match
ENSDARG00000004023	ENSDART00000010896	5	42353887	42359120	-1	BC060892.1	2104	1050	RNASEQT00000006023	42353717	42359297	2451	1050	1398	RNASEQG00000006023	6	6	6	6	5	5	0	5	5	0	864	4	2104	6	1050	6	5923	42354770	42354770	883	1053	trim	2048	0
ENSDARG00000018757	ENSDART00000010900	21	37092134	37117080	-1	BC114290.1	2360	1029	RNASEQT00000003050	37092134	37117178	2458	1206	1375	RNASEQG00000003050	4	3	4	4	3	3	0	2	2	0	1260	1	2360	4	1029	2	10951	37093217	37093217	1083	1083	trim	204	0
ENSDARG00000017355	ENSDART00000010903	4	5518504	5525279	-1	BC109416.1	1134	834	RNASEQT00000020991	5515812	5525263	3810	834	949	RNASEQG00000020991	5	5	5	5	4	4	0	4	4	0	133	0	1118	5	834	5	360	5518673	5518673	169	2861	unchanged
ENSDARG00000016412	ENSDART00000010918	13	24212343	24219764	1	AY049731.1	1663	1365	0	0	0	0	0	0	0	5	4	0	0	4	4	0	3	3	0	501	0	0	0	0	0	2590	24219525	0	239	No match
ENSDARG00000043905	ENSDART00000010942	21	40528647	40551247	1	BC071542.1	2032	1380	RNASEQT00000003096	40528515	40551247	2164	1380	1596	RNASEQG00000003096	8	7	8	7	7	7	0	6	6	0	1904	0	2032	8	1380	7	5872	40550679	40550679	568	568	trim	117	0
ENSDARG00000003573	ENSDART00000010944	3	35636166	35640097	-1	BC076304.1	1020	549	RNASEQT00000021969	35636163	35640207	1133	549	730	RNASEQG00000021969	6	6	6	6	5	5	0	5	5	0	4537	0	1020	6	549	6	4952	35636566	35636566	400	403	trim	971	0
ENSDARG00000020114	ENSDART00000010993	8	31905160	31922974	-1	BC068354.1	2773	1959	RNASEQT00000023235	31905162	31923051	2836	1947	2383	RNASEQG00000023235	11	10	11	10	10	9	0	9	8	0	1616	1	2759	10	1947	9	5856	31905615	31905615	455	453	trim	5	0
ENSDARG00000005162	ENSDART00000010997	19	11478790	11505144	-1	BC044420.1	2155	747	RNASEQT00000024976	11478790	11521395	1993	855	1016	RNASEQG00000024976	8	8	10	9	7	7	0	7	7	0	46541	9	1516	5	539	6	121229	11479945	11479945	1155	977	trim	922	0
ENSDARG00000013822	ENSDART00000011003	12	49612526	49620904	1	BC092970.1	561	327	RNASEQT00000013656	49612462	49620904	625	411	439	RNASEQG00000013656	4	3	4	4	3	3	0	2	2	0	2327	0	561	4	327	2	4736	49620718	49620718	186	186	trim	183	0
ENSDARG00000015997	ENSDART00000011004	23	35838494	35841755	-1	BC076536.1	2918	1446	RNASEQT00000009810	35839274	35841797	2207	0		No match	3	1	3	0	2	2	0	0	0	0	68	5	2102	1	0	0	5324	35839737		1243	2207	trim	121	0
ENSDARG00000006712	ENSDART00000011025	19	6226932	6243989	1	BC071180.1	3031	1326	RNASEQT00000024903	6226870	6243995	3096	1323	1501	RNASEQG00000024903	8	7	8	7	7	6	1	6	5	1	861	1	3028	7	1323	6	10573	6242400	6242400	1589	1595	trim	105	0
ENSDARG00000007743	ENSDART00000011030	15	19313763	19323662	1	BC108058.1	1234	483	RNASEQT00000017725	19313745	19325175	2774	492	1080	RNASEQG00000017725	5	4	5	4	4	4	0	3	3	0	253	0	1234	3	483	2	1646	19323481	19323481	181	1694	unchanged
ENSDARG00000002365	ENSDART00000011076	22	5682181	5745820	-1	BC053143.1	1738	1164	RNASEQT00000000958	5681980	5746174	2293	1164	1598	RNASEQG00000000958	10	10	10	10	9	9	0	9	9	0	4401	1	1738	10	1164	10	8107	5682675	5682675	494	695	trim	122	0
ENSDARG00000012499	ENSDART00000011082	7	52277645	52301468	1	AY597250.1	6774	4197	RNASEQT00000008094	52277552	52301959	6883	4197	4897	RNASEQG00000008094	19	18	20	18	18	18	0	17	17	0	6366	3	6719	18	4197	18	37259	52299498	52299498	1970	1986	unchanged
ENSDARG00000020738	ENSDART00000011111	3	1811098	1818447	1	BC124490.1	1926	1692	0	0	0	0	0	0	0	5	4	0	0	4	1	0	3	0	0	3	0	0	0	0	0	370	1818269	0	178	No match
ENSDARG00000004355	ENSDART00000011128	19	30604684	30606958	-1	DQ017630.1	705	705	0	0	0	0	0	0	0	2	2	0	0	1	0	0	1	0	0	0	0	0	0	0	0	21	30604684	0	0	No match
ENSDARG00000009637	ENSDART00000011138	19	10964274	10975101	1	BC060902.1	3014	576	RNASEQT00000024968	10961820	10975100	3810	576	911	RNASEQG00000024968	4	3	4	3	3	2	0	2	2	0	1973	0	3005	1	576	3	27555	10972201	10972201	2421	2899	trim	245	0
ENSDARG00000010169	ENSDART00000011143	24	20797368	20801306	-1	BC083419.1	1341	855	RNASEQT00000019686	20796755	20801837	2485	855	1522	RNASEQG00000019686	5	5	5	5	4	3	1	4	3	1	546	150	1341	5	855	5	2422	20797718	20797718	350	963	trim	36	0
ENSDARG00000019646	ENSDART00000011146	23	103338	110023	-1	BC078298.1	1832	600	RNASEQT00000009905	11035	138719	6454	0		No match	2	1	9	0	1	1	0	0	0	0	260	0	1677	0	0	0	3097	109233		1041	6454	unchanged
ENSDARG00000017785	ENSDART00000011166	16	6933919	6966664	1	BC129386.1	1942	429	RNASEQT00000012725	6933868	6967070	2855	1821	2147	RNASEQG00000012725	16	7	16	14	15	13	0	6	5	0	857	0	1942	13	429	5	1813	6955915	6966362	1238	708	unchanged
ENSDARG00000005141	ENSDART00000011170	11	36205232	36277976	1	BC055127.1	1691	1311	RNASEQT00000000330	36205193	36282134	5888	1311	1539	RNASEQG00000000330	11	10	11	10	10	10	0	9	9	0	516	0	1691	11	1311	10	1149	36277785	36277785	191	4349	extend	0	2974	0
ENSDARG00000010978	ENSDART00000011171	11	32072825	32083173	1	BC090304.1	893	633	RNASEQT00000000721	32061048	32084208	3410	2019	2243	RNASEQG00000000721	7	7	17	15	6	6	0	6	6	0	1292	0	893	5	633	6	2749	32082913	32082913	260	1167	unchanged
ENSDARG00000001782	ENSDART00000011183	11	8275835	8296952	1	BC053227.1	2386	1188	RNASEQT00000000112	8275700	8296956	2525	1188	1423	RNASEQG00000000112	10	10	10	10	9	9	0	9	9	0	648	0	2386	10	1188	10	1713	8295854	8295854	1098	1102	extend	0	732	0
ENSDARG00000010472	ENSDART00000011188	2	44264579	44317038	-1	AF286373.1	3904	3054	RNASEQT00000004053	44264681	44317417	4181	3054	3532	RNASEQG00000004053	24	24	24	24	23	23	0	23	23	0	6508	7	3802	24	3054	24	11054	44265330	44265330	751	649	trim	105	0
ENSDARG00000007720	ENSDART00000011229	5	42762165	42769744	1	BC076294.1	683	375	RNASEQT00000006029	42761893	42769746	957	375	706	RNASEQG00000006029	5	4	5	4	4	4	0	3	3	0	8292	0	683	5	375	4	11572	42769495	42769495	249	251	trim	674	0
ENSDARG00000003599	ENSDART00000011251	3	30018344	30022467	-1	AY561514.1	1354	1212	RNASEQT00000021861	30018336	30022510	1405	1212	1336	RNASEQG00000021861	9	9	9	9	8	8	0	8	8	0	532567	99	1354	9	1212	9	309902	30018405	30018405	61	69	trim	214	0
ENSDARG00000007891	ENSDART00000011252	12	29033409	29039083	1	BC076021.1	1364	723	RNASEQT00000013522	29033236	29040297	2790	762	1000	RNASEQG00000013522	4	4	3	3	3	2	0	3	2	0	274	1	1364	2	723	2	1579	29038507	29038507	576	1790	extend	0	885	281
ENSDARG00000009390	ENSDART00000011258	8	20028078	20038077	1	BC155270.1	1720	924	RNASEQT00000023097	20028004	20038077	3250	843	977	RNASEQG00000023097	12	11	10	9	11	10	0	10	9	0	1144	2	1720	9	738	8	1967	20037341	20035804	736	2273	extend	0	2323	635
ENSDARG00000009020	ENSDART00000011283	20	925721	933262	-1	AY148349.1	2852	1428	RNASEQT00000015705	925931	938520	1667	1428	1531	RNASEQG00000015705	2	2	3	2	1	1	0	1	1	0	17	0	1588	1	1428	2	987	926067	926067	346	136	unchanged
ENSDARG00000017014	ENSDART00000011303	7	75472024	75483740	1	BC090759.1	1345	768	RNASEQT00000008258	75471738	75489414	6290	768	1199	RNASEQG00000008258	6	6	7	6	5	5	0	5	5	0	2101	0	1345	5	768	6	10063	75483308	75483308	432	5091	unchanged
ENSDARG00000009953	ENSDART00000011304	9	35369146	35395313	1	BC045931.1	2629	1815	RNASEQT00000016470	35370382	35395302	4542	3837	3947	RNASEQG00000016470	14	14	27	26	13	9	0	13	9	0	4639	0	2084	7	1383	6	17725	35394707	35394707	606	595	trim	417	0
ENSDARG00000020676	ENSDART00000011305	21	26735084	26749063	1	BC075771.1	2842	2184	RNASEQT00000002950	26735038	26749065	2890	2184	2332	RNASEQG00000002950	18	17	18	17	17	17	0	16	16	0	7626	0	2842	18	2184	17	15159	26748507	26748507	556	558	trim	1122	0
ENSDARG00000011594	ENSDART00000011318	21	13804325	13821845	1	BC083229.1	1524	1113	RNASEQT00000002820	13804224	13821845	1625	1149	1231	RNASEQG00000002820	10	10	10	10	9	7	0	9	7	0	4301	1	1512	8	1101	8	12280	13821451	13821451	394	394	trim	122	0
ENSDARG00000003872	ENSDART00000011324	7	30061203	30173823	1	BC065950.1	3153	1746	RNASEQT00000007202	30061141	30173823	3215	1746	2021	RNASEQG00000007202	9	8	9	8	8	8	0	7	7	0	2912	1	3153	9	1746	8	14117	30172629	30172629	1194	1194	trim	220	0
ENSDARG00000006686	ENSDART00000011332	5	63052372	63110484	1	BC045296.1	1800	684	RNASEQT00000006165	63052217	63110868	2339	684	983	RNASEQG00000006165	6	6	6	6	5	5	0	5	5	0	2487	0	1800	6	684	6	17691	63109512	63109512	972	1356	trim	479	0
ENSDARG00000003592	ENSDART00000011337	5	34899106	34901614	1	BC129348.1	1023	930	RNASEQT00000005939	34898327	34913447	7173	930	1739	RNASEQG00000005939	9	9	14	9	8	8	0	8	8	0	1922	0	1023	8	930	9	2334	34901551	34901551	63	5434	trim	1466	0
ENSDARG00000020761	ENSDART00000011362	11	13713954	13719298	1	AY423023.1	2661	1224	RNASEQT00000000152	13712564	13719298	4051	1224	2866	RNASEQG00000000152	8	8	8	8	7	7	0	7	7	0	3275	0	2661	8	1224	8	21080	13718113	13718113	1185	1185	trim	143	0
ENSDARG00000010146	ENSDART00000011397	25	16947694	16957847	-1	BC076057.1	1319	1269	RNASEQT00000010889	16947691	16955018	1006	882	965	RNASEQG00000010889	11	11	7	7	10	7	0	10	7	0	19	0	932	6	882	6	116	16947732	16947732	38	41	unchanged
ENSDARG00000018119	ENSDART00000011435	18	601742	605530	1	BC059554.1	619	456	RNASEQT00000004836	601703	605514	642	417	495	RNASEQG00000004836	5	4	5	4	4	4	0	3	3	0	6775	1	603	5	417	4	8448	604458	604458	163	147	trim	602	0
ENSDARG00000010487	ENSDART00000011447	15	23076175	23092649	1	BC071328.1	1464	1047	RNASEQT00000017312	23076165	23092649	1474	1047	1231	RNASEQG00000017312	9	9	9	9	8	8	0	8	8	0	8565	1	1464	9	1047	9	13058	23092406	23092406	243	243	trim	7	0
ENSDARG00000005185	ENSDART00000011461	12	33296024	33318229	1	BC154779.1	1977	1353	RNASEQT00000013561	33302202	33318396	3156	1353	2771	RNASEQG00000013561	15	9	9	9	14	10	0	8	8	0	4387	1	1585	8	1353	9	9149	33318011	33318011	218	385	trim	232	0
ENSDARG00000020978	ENSDART00000011471	10	38118058	38126716	-1	BC081378.1	1024	957	RNASEQT00000024304	38117680	38126929	1615	957	1184	RNASEQG00000024304	5	5	5	5	4	4	0	4	4	0	4576	0	1024	5	957	5	19752	38118111	38118111	53	431	trim	60	0
ENSDARG00000034757	ENSDART00000011480	14	31296587	31321739	-1	BC090450.1	2500	1086	RNASEQT00000018246	31296587	31307750	2164	579	760	RNASEQG00000018246	13	12	7	6	12	8	0	11	7	0	216	0	2023	6	579	5	979	31299693	31299693	1404	1404	trim	6	0
ENSDARG00000040251	ENSDART00000011497	16	31753285	31762834	1	BC092901.1	1576	1002	RNASEQT00000012405	31753040	31762839	1826	1002	1323	RNASEQG00000012405	8	7	8	7	7	7	0	6	6	0	6664	0	1576	8	1002	7	15490	31762336	31762336	498	503	trim	7	0
ENSDARG00000055271	ENSDART00000011506	16	56526139	56581107	1	EF192161.1	1340	1230	RNASEQT00000013198	56531104	56581304	1376	831	1179	RNASEQG00000013198	11	11	9	5	10	8	0	10	8	0	345	0	1178	8	831	4	843	56581107	56581107	0	197	unchanged
ENSDARG00000009459	ENSDART00000011539	10	6929526	6938339	-1	BC092752.1	2184	1164	RNASEQT00000024479	6929132	6938804	3043	1164	1846	No match	2	2	2	2	1	1	0	1	1	0	34	0	2184	2	1164	2	1164	6930329	6930329	803	1197	unchanged
ENSDARG00000002536	ENSDART00000011554	23	7622479	7652415	1	BC055558.1	2041	945	RNASEQT00000009549	7622373	7654109	4107	1956	2057	RNASEQG00000009549	16	10	18	18	15	14	0	9	8	0	14345	1	2041	14	945	7	26509	7640848	7652059	1071	2050	extend	0	1560	0
ENSDARG00000013525	ENSDART00000011560	1	58029343	58041628	1	BC122362.1	1197	705	RNASEQT00000009380	58029293	58041635	1254	732	848	RNASEQG00000009380	8	7	8	7	7	7	0	6	6	0	284	0	1197	8	705	7	404	58041229	58041229	399	406	unchanged
ENSDARG00000010841	ENSDART00000011581	7	33940215	33946224	1	AY714131.1	1013	393	RNASEQT00000007992	33942871	33981018	3583	0	1756	No match	3	2	14	0	2	1	0	1	1	0	12	0	313	0	0	0	332	33945630	33979191	594	1827	unchanged
ENSDARG00000016139	ENSDART00000011583	13	35694395	35703434	1	BC045401.1	1814	1692	RNASEQT00000011910	35694363	35703584	1996	1692	1792	RNASEQG00000011910	5	4	5	4	4	4	0	3	3	0	78	0	1814	5	1692	4	1083	35703380	35703380	54	204	unchanged
ENSDARG00000017494	ENSDART00000011601	2	23932608	24008563	1	EF462417.1	2167	1503	RNASEQT00000003844	23932582	24015567	9197	1503	1557	RNASEQG00000003844	9	9	9	9	8	8	0	8	8	0	239	1	2167	9	1503	9	905	24007927	24007927	636	7640	extend	0	4964	110
ENSDARG00000012493	ENSDART00000011621	20	723477	735550	1	BC154420.1	1631	1167	RNASEQT00000015212	704900	735876	3977	3108	3468	RNASEQG00000015212	11	10	24	23	10	10	0	9	9	0	3370	0	1631	10	1167	9	5647	735367	735367	183	509	trim	131	0
ENSDARG00000002601	ENSDART00000011627	23	37908871	37910191	1	BC095012.1	1183	945	RNASEQT00000010244	37908871	37910194	1186	945	973	RNASEQG00000010244	2	2	2	2	1	1	0	1	1	0	53	0	1183	2	945	2	2570	37909981	37909981	210	213	unchanged
ENSDARG00000018984	ENSDART00000011652	6	55881326	55968880	-1	BC081636.1	3511	1428	RNASEQT00000014706	55881326	55968866	3494	1425	1840	RNASEQG00000014706	16	13	16	13	15	15	0	12	12	0	1815	1	3494	15	1425	12	6735	55882980	55882980	1654	1654	extend	0	1015	4
ENSDARG00000009942	ENSDART00000011657	11	11904847	11914072	-1	BC154325.1	2138	1767	RNASEQT00000000134	11904847	11914398	2464	1686	2116	RNASEQG00000000134	12	12	12	11	11	11	0	11	11	0	17982	0	2138	12	1686	10	36602	11905195	11905195	348	348	trim	704	0
ENSDARG00000011496	ENSDART00000011662	12	26960373	27012959	1	BC085660.1	3521	1149	RNASEQT00000013486	26959799	27012959	3896	1149	1873	RNASEQG00000013486	6	5	7	5	5	5	0	4	4	0	3200	0	3322	5	1149	5	36701	27010936	27010936	2023	2023	trim	699	0
ENSDARG00000011125	ENSDART00000011663	6	57428413	57435485	-1	BC065601.1	961	720	RNASEQT00000014712	57428413	57435590	1066	720	924	RNASEQG00000014712	7	7	7	7	6	6	0	6	6	0	32837	5	961	7	720	7	45721	57428555	57428555	142	142	trim	255	0
ENSDARG00000040298	ENSDART00000011669	16	26153371	26155271	1	BC107620.1	1192	807	RNASEQT00000012321	26153314	26155271	1249	768	876	RNASEQG00000012321	4	4	4	3	3	3	0	3	3	0	11112	0	1192	4	768	2	71496	26154898	26154898	373	373	trim	244	0
ENSDARG00000004736	ENSDART00000011676	17	27404135	27562655	1	BC085440.1	944	699	RNASEQT00000002445	27404092	27498246	558	402	557	RNASEQG00000002445	5	5	3	3	4	3	0	4	3	0	109	0	512	2	388	2	348	27562534	27498245	121	1	unchanged
ENSDARG00000020623	ENSDART00000011691	3	37771276	37780619	-1	BC055592.1	1940	579	RNASEQT00000022002	37771276	37780777	2098	579	757	RNASEQG00000022002	6	6	6	6	5	5	0	5	5	0	5588	3	1940	6	579	6	16098	37772617	37772617	1341	1341	trim	42	0
ENSDARG00000020482	ENSDART00000011699	5	24376952	24386108	-1	BC046880.1	1950	1326	RNASEQT00000005784	24377000	24386639	2241	1326	1752	RNASEQG00000005784	10	9	10	9	9	9	0	8	8	0	25959	1	1815	9	1326	9	75215	24377489	24377489	537	489	trim	141	0
ENSDARG00000008969	ENSDART00000011701	1	9127890	9135505	1	BC066629.1	1717	1458	RNASEQT00000008369	9129166	9135581	1678	1182	1373	RNASEQG00000008369	8	8	6	6	7	5	0	7	5	0	2812	1	1600	5	1182	5	11309	9135276	9135276	229	305	trim	372	0
ENSDARG00000010862	ENSDART00000011704	8	27249532	27261610	1	DQ104411.1	1878	1230	RNASEQT00000023196	27249449	27261605	2045	1230	1408	RNASEQG00000023196	10	9	9	9	9	7	1	8	7	1	1531	181	1873	8	1230	9	6012	27260968	27260968	553	637	trim	299	0
ENSDARG00000019338	ENSDART00000011706	17	31671198	31678375	1	BC152161.1	1380	1113	RNASEQT00000001985	31670015	31678375	2563	1113	2434	RNASEQG00000001985	6	6	6	6	5	5	0	5	5	0	813	0	1380	6	1113	6	2738	31678246	31678246	129	129	trim	259	0
ENSDARG00000017400	ENSDART00000011724	6	9655267	9666658	-1	AF392996.1	2501	1098	RNASEQT00000014820	9656152	9666723	1681	1098	1348	RNASEQG00000014820	3	3	3	3	2	2	0	2	2	0	130	0	1616	3	1098	3	2747	9656485	9656485	1218	333	unchanged
ENSDARG00000020857	ENSDART00000011727	1	40426579	40445528	1	BC076093.1	2500	1569	RNASEQT00000009162	40426547	40445932	2903	1689	1837	RNASEQG00000009162	13	12	12	12	12	12	0	11	11	0	762	0	2467	12	1536	10	2488	40444866	40444866	662	1066	unchanged
ENSDARG00000010764	ENSDART00000011737	15	41987581	42013228	1	BC114254.1	1699	963	RNASEQT00000017470	41987470	42013228	1810	963	1099	RNASEQG00000017470	10	10	10	10	9	9	0	9	9	0	2325	1	1699	10	963	10	6116	42012517	42012517	711	711	trim	292	0
ENSDARG00000019117	ENSDART00000011751	25	5370118	5398121	1	BC059481.1	1389	1098	0	0	0	0	0	0	0	13	13	0	0	12	12	0	12	12	0	2801	0	0	0	0	0	2508	5397846	0	275	No match
ENSDARG00000020781	ENSDART00000011757	9	8931656	8939073	1	AY954910.1	708	708	RNASEQT00000016138	8771977	8941992	8647	5094	5728	RNASEQG00000016138	3	3	49	48	2	2	0	2	2	0	690	1	708	2	708	2	2997	8939073	8939073	0	2919	extend	0	1805	0
ENSDARG00000007092	ENSDART00000011780	3	53955062	53988566	1	BC056771.1	2900	2556	RNASEQT00000022113	53955016	53988566	2946	2556	2706	RNASEQG00000022113	19	19	19	19	18	18	0	18	18	0	11057	3	2900	19	2556	19	8870	53988326	53988326	240	240	trim	1146	0
ENSDARG00000018623	ENSDART00000011785	6	3280974	3298672	1	BC046050.1	2587	2217	RNASEQT00000014761	3280875	3300728	4392	2217	2568	RNASEQG00000014761	18	18	19	18	17	17	0	17	17	0	2110	0	2587	17	2217	18	4051	3298554	3298554	118	1824	unchanged
ENSDARG00000019581	ENSDART00000011809	1	25349781	25390224	1	BC045300.1	3281	2871	RNASEQT00000009087	25349565	25451953	4944	1491	1746	RNASEQG00000009087	26	26	28	14	25	22	0	25	22	0	4560	1	3269	21	1446	11	9191	25389853	25372622	371	3198	unchanged
ENSDARG00000014916	ENSDART00000011822	9	28373065	28378239	1	BC053189.1	1824	1086	RNASEQT00000016847	28371985	28378258	2923	1086	2333	RNASEQG00000016847	6	6	6	6	5	5	0	5	5	0	156	0	1824	6	1086	6	1446	28377668	28377668	571	590	unchanged
ENSDARG00000003263	ENSDART00000011823	7	47573290	47581162	1	BC095328.1	1067	660	RNASEQT00000007382	47573247	47581162	1110	660	787	RNASEQG00000007382	7	7	7	7	6	6	0	6	6	0	3768	2	1067	7	660	7	6051	47580839	47580839	323	323	trim	616	0
ENSDARG00000019566	ENSDART00000011837	9	45357660	45360737	-1	BC056603.1	2149	1053	RNASEQT00000016543	45357660	45361037	2449	1053	1419	RNASEQG00000016543	2	1	2	1	1	1	0	0	0	0	647	0	2149	2	1053	1	15277	45358690	45358690	1030	1030	trim	326	0
ENSDARG00000019360	ENSDART00000011865	6	6695929	6712803	1	BC078653.1	3133	2301	RNASEQT00000014246	6695728	6712811	3342	2301	2650	RNASEQG00000014246	19	18	19	18	18	18	0	17	17	0	12871	3	3133	19	2301	18	30503	6712119	6712119	684	692	trim	474	0
ENSDARG00000003032	ENSDART00000011878	5	25877547	25888255	-1	BC049427.1	2018	1221	RNASEQT00000005820	25877547	25888546	2309	1221	1521	RNASEQG00000005820	11	11	11	11	10	10	0	10	10	0	37593	3	2018	11	1221	11	80943	25878335	25878335	788	788	trim	173	0
ENSDARG00000002400	ENSDART00000011882	4	2216012	2241310	-1	BC044152.1	1415	1158	RNASEQT00000020580	2213920	2241401	3586	1179	1367	RNASEQG00000020580	15	13	15	14	14	14	0	12	12	0	68229	399	1403	14	1146	11	47603	2216139	2216139	127	2219	trim	61	0
ENSDARG00000016676	ENSDART00000011893	18	22574176	22756346	1	BC059637.1	2381	1065	RNASEQT00000005042	22573780	22757367	3763	1065	1751	RNASEQG00000005042	8	8	9	8	7	7	0	7	7	0	4083	3	2381	7	1065	8	17861	22755320	22755320	1026	2012	trim	530	0
ENSDARG00000020981	ENSDART00000011906	2	9779388	9829157	1	BC092945.1	1589	1095	RNASEQT00000004296	9795942	9829473	2000	1062	1214	RNASEQG00000004296	8	8	8	8	7	7	0	7	7	0	262	0	1517	7	1047	7	1154	9828687	9828687	470	786	unchanged
ENSDARG00000002970	ENSDART00000011919	2	2368246	2384584	-1	BC047188.1	2026	1107	RNASEQT00000003628	2368260	2384698	2126	1107	1323	RNASEQG00000003628	10	10	10	10	9	9	0	9	9	0	7518	3	2012	10	1107	10	30763	2369063	2369063	817	803	trim	134	0
ENSDARG00000002591	ENSDART00000011931	6	40763526	40771887	1	AY398410.1	1741	1371	0	0	0	0	0	0	0	11	11	0	0	10	10	0	10	10	0	13843	0	0	0	0	0	20411	40771637	0	250	No match
ENSDARG00000004211	ENSDART00000011936	16	19704473	19721660	-1	BC090178.1	2168	1161	RNASEQT00000012260	19704292	19721735	2150	1161	1391	RNASEQG00000012260	9	8	10	8	8	8	0	7	7	0	2354	7	1894	7	1161	8	10512	19705316	19705316	843	759	trim	116	0
ENSDARG00000008732	ENSDART00000011970	6	46673428	46679555	-1	BC054712.1	2295	1839	RNASEQT00000014615	46673436	46679639	2371	1839	2025	RNASEQG00000014615	4	4	4	4	3	3	0	3	3	0	2123	4	2287	4	1839	4	30337	46673782	46673782	354	346	trim	679	0
ENSDARG00000018890	ENSDART00000012018	18	33747015	33752007	-1	BC064308.1	1285	846	RNASEQT00000005488	33747005	33752494	1782	846	1375	RNASEQG00000005488	7	6	7	6	6	6	0	5	5	0	13826	2	1285	7	846	6	36735	33747412	33747412	397	407	unchanged
ENSDARG00000020814	ENSDART00000012023	6	16317853	16324012	-1	BC076192.1	838	543	RNASEQT00000014352	16317853	16324005	831	543	713	RNASEQG00000014352	4	4	4	4	3	3	0	3	3	0	518	0	831	4	543	4	1314	16317971	16317971	118	118	trim	235	0
ENSDARG00000020898	ENSDART00000012048	16	4012902	4042519	1	BC095683.1	2656	1584	RNASEQT00000012696	4010207	4042699	2868	1716	1855	RNASEQG00000012696	17	16	18	17	16	16	0	15	15	0	1373	0	2551	15	1584	15	3531	4041686	4041686	833	1013	unchanged
ENSDARG00000012076	ENSDART00000012050	5	39578958	39581964	1	BC083473.1	960	789	0	0	0	0	0	0	0	4	3	0	0	3	3	0	2	2	0	26253	8	0	0	0	0	183017	39581830	0	134	No match
ENSDARG00000006773	ENSDART00000012053	16	6390539	6400908	1	BC059658.1	1681	930	RNASEQT00000012130	6393341	6431003	6964	837	869	RNASEQG00000012130	7	6	5	5	6	5	0	5	4	0	175	0	569	3	543	3	1564	6400341	6424908	567	6095	extend	0	2740	79
ENSDARG00000014849	ENSDART00000012064	15	17101271	17106252	-1	BC086728.1	1312	969	RNASEQT00000017708	17098554	17106319	1677	960	1262	RNASEQG00000017708	5	5	6	6	4	4	0	4	4	0	99	0	1189	4	954	4	493	17101379	17098969	108	415	unchanged
ENSDARG00000012249	ENSDART00000012098	14	244406	245287	1	DQ812985.1	882	882	RNASEQT00000018027	241923	246756	2736	0		No match	1	1	2	0	0	0	0	0	0	0	0	0	882	0	0	0	4823	245287		0	2736	trim	360	0
ENSDARG00000011273	ENSDART00000012116	14	5662891	5684626	-1	AF398518.1	1718	906	RNASEQT00000018526	5662820	5684698	1861	906	1456	RNASEQG00000018526	4	4	4	4	3	3	0	3	3	0	140	0	1718	4	906	4	1254	5663225	5663225	334	405	unchanged
ENSDARG00000004167	ENSDART00000012119	2	6837116	6853272	1	BC092900.1	1561	870	RNASEQT00000004260	6837000	6853108	1513	870	996	RNASEQG00000004260	8	7	8	7	7	7	0	6	6	0	1096	0	1397	8	870	7	1830	6847839	6847839	681	517	unchanged
ENSDARG00000004318	ENSDART00000012132	8	31273770	31298114	1	BC065429.1	1625	1101	RNASEQT00000023224	31273694	31298107	1694	1101	1305	RNASEQG00000023224	16	15	16	15	15	15	0	14	14	0	2249	0	1618	16	1101	15	1937	31297718	31297718	396	389	trim	251	0
ENSDARG00000002571	ENSDART00000012164	18	37764299	37820152	1	BC081555.1	1470	1035	RNASEQT00000005123	37764206	37826745	1990	1035	1273	RNASEQG00000005123	10	9	11	9	9	9	0	8	8	0	1697	1	1470	9	1035	9	3329	37819862	37819862	290	717	trim	25	0
ENSDARG00000006290	ENSDART00000012167	19	36905562	36909904	-1	BC095614.1	524	321	RNASEQT00000025207	36905562	36913022	3642	321	3508	RNASEQG00000025207	3	2	3	2	2	2	0	1	1	0	6568	0	524	3	321	2	12315	36905696	36905696	134	134	trim	905	0
ENSDARG00000013117	ENSDART00000012191	2	37376913	37405418	-1	BC056817.1	3284	1482	RNASEQT00000003985	37376913	37406527	4393	1482	2651	RNASEQG00000003985	12	12	12	12	11	11	0	11	11	0	2582	7	3284	12	1482	12	15692	37378655	37378655	1742	1742	trim	115	0
ENSDARG00000017821	ENSDART00000012194	23	7453363	7464592	1	BC116537.1	2239	1152	RNASEQT00000009546	7453226	7464592	2376	1152	1665	RNASEQG00000009546	7	6	7	6	6	6	0	5	5	0	857	0	2239	7	1152	6	5900	7463881	7463881	711	711	trim	1167	0
ENSDARG00000003373	ENSDART00000012212	22	40996082	41003793	1	BC076149.1	911	600	RNASEQT00000001226	40995881	41003793	1112	600	904	RNASEQG00000001226	5	5	5	5	4	4	0	4	4	0	773	0	911	5	600	5	3245	41003585	41003585	208	208	trim	294	0
ENSDARG00000052625	ENSDART00000012229	20	44670115	44701992	-1	BC059689.1	1023	327	RNASEQT00000015588	44670115	44702013	1044	327	427	RNASEQG00000015588	4	4	4	4	3	3	0	3	3	0	1650	1	1023	4	327	4	4492	44670732	44670732	617	617	trim	87	0
ENSDARG00000012563	ENSDART00000012232	13	32884155	32949780	-1	BC075908.1	1660	1113	RNASEQT00000011886	32883802	32949827	2060	1113	1474	RNASEQG00000011886	8	8	8	8	7	7	0	7	7	0	1613	0	1660	8	1113	8	4354	32884388	32884388	233	586	unchanged
ENSDARG00000012946	ENSDART00000012234	23	46158834	46166002	-1	BC045947.1	2009	1005	RNASEQT00000009896	46159403	46166125	1563	1005	1272	RNASEQG00000009896	9	9	9	9	8	8	0	8	8	0	5040	0	1440	9	1005	9	17396	46159694	46159694	860	291	trim	1053	0
ENSDARG00000014943	ENSDART00000012241	18	20217004	20239080	-1	BC047805.1	3147	2604	RNASEQT00000005012	20216986	20239485	3570	2604	3071	RNASEQG00000005012	22	22	22	22	21	21	0	21	21	0	17686	34	3147	22	2604	22	36076	20217485	20217485	481	499	trim	169	0
ENSDARG00000013752	ENSDART00000012256	25	32108116	32119013	1	AF539738.1	784	531	0	0	0	0	0	0	0	7	6	0	0	6	6	0	5	5	0	45289	1	0	0	0	0	50106	32118854	0	159	No match
ENSDARG00000013340	ENSDART00000012265	12	26612194	26618916	1	BC071298.1	1838	723	RNASEQT00000013481	26611991	26637963	3341	723	1059	RNASEQG00000013481	6	6	13	6	5	5	0	5	5	0	4827	2	1838	5	723	6	15793	26617934	26617934	982	2282	trim	514	0
ENSDARG00000002264	ENSDART00000012268	5	26741884	26744114	1	BC095781.1	585	408	RNASEQT00000005832	26741457	26745556	2454	408	888	RNASEQG00000005832	2	1	2	1	1	1	0	0	0	0	1011	0	585	2	408	1	3717	26743990	26743990	124	1566	extend	0	1357	89
ENSDARG00000003084	ENSDART00000012287	25	35952882	35971363	1	BC085537.1	2018	1818	RNASEQT00000010664	35952596	35977260	5693	2193	2613	RNASEQG00000010664	11	11	15	15	10	10	0	10	10	0	365	0	1901	10	1767	10	1232	35971297	35974180	66	3080	extend	0	1945	50
ENSDARG00000038196	ENSDART00000012292	3	50234177	50239487	1	BC093223.1	945	771	0	0	0	0	0	0	0	6	6	0	0	5	5	0	5	5	0	544	0	0	0	0	0	1755	50239341	0	146	No match
ENSDARG00000019579	ENSDART00000012307	14	49620147	49768506	-1	AF031376.1	1596	1158	RNASEQT00000018829	49618813	49768425	2855	1326	1345	RNASEQG00000018829	9	9	9	9	8	8	0	8	8	0	415	0	1515	8	1158	8	1350	49620323	49620323	176	1510	unchanged
ENSDARG00000014907	ENSDART00000012318	12	12494770	12563669	-1	BC155591.1	3773	1431	RNASEQT00000013811	12496633	12563880	2121	1431	1767	RNASEQG00000013811	9	9	9	9	8	8	0	8	8	0	2063	0	1910	9	1431	9	12871	12496987	12496987	2217	354	unchanged
ENSDARG00000002909	ENSDART00000012336	22	17881697	17912865	-1	BC045978.1	1933	1521	RNASEQT00000001484	17881446	17913025	4591	3768	4028	RNASEQG00000001484	10	9	31	30	9	8	0	8	7	0	4614	1	1933	8	1521	7	19441	17882009	17882009	312	563	unchanged
ENSDARG00000007836	ENSDART00000012361	5	46424957	46429495	1	BC066490.1	1389	1014	RNASEQT00000006055	46423247	46429495	1637	1092	1271	RNASEQG00000006055	7	7	8	8	6	6	0	6	6	0	86978	25	1389	6	1014	6	213822	46429129	46429129	366	366	trim	132	0
ENSDARG00000002305	ENSDART00000012385	9	35217695	35231495	-1	BC139717.1	2799	1812	RNASEQT00000016467	35217692	35231567	2874	1812	2053	RNASEQG00000016467	15	14	15	14	14	14	0	13	13	0	15612	3	2799	15	1812	14	45459	35218513	35218513	818	821	trim	1876	0
ENSDARG00000019990	ENSDART00000012391	8	41842854	41856377	-1	BC083305.1	902	561	RNASEQT00000023291	41838730	41905030	5707	1140	1429	RNASEQG00000023291	7	7	7	7	6	6	0	6	6	0	409	0	613	6	459	6	669	41843008	41843008	154	4278	extend	0	3498	1
ENSDARG00000004161	ENSDART00000012396	21	42562491	42585540	1	BC049322.1	2041	1647	RNASEQT00000003565	42562459	42590791	4786	1311	1410	RNASEQG00000003565	20	20	20	14	19	18	0	19	18	0	14450	0	2041	17	1247	13	12839	42585213	42579101	327	3376	unchanged
ENSDARG00000014969	ENSDART00000012413	2	31675429	31724184	1	BC081575.1	2654	1506	RNASEQT00000003931	31660458	31724409	3635	1506	2589	RNASEQG00000003931	12	12	20	12	11	10	1	11	10	1	1573	120	2464	11	1506	12	5729	31723363	31723363	821	1046	trim	546	0
ENSDARG00000013657	ENSDART00000012414	Zv9_scaffold3563	195807	232099	-1	BC044426.1	2852	1341	RNASEQT00000019265	195807	241224	2959	1341	1606	RNASEQG00000019265	9	9	10	9	8	8	0	8	8	0	1734	0	2702	8	1341	9	9801	197160	197160	1353	1353	trim	198	0
ENSDARG00000012995	ENSDART00000012419	9	143854	152656	-1	BC055228.1	1927	1779	RNASEQT00000016619	143754	152701	2072	1779	1842	RNASEQG00000016619	9	9	9	9	8	8	0	8	8	0	592	1	1927	9	1779	9	2804	143984	143984	130	230	unchanged
ENSDARG00000002790	ENSDART00000012442	2	9578714	9607449	-1	BC067560.1	2022	1311	RNASEQT00000003707	9579036	9593346	1225	759	892	RNASEQG00000003707	11	10	7	7	10	9	0	9	8	0	17811	1	1221	6	759	6	31438	9579369	9579369	655	333	trim	162	0
ENSDARG00000056184	ENSDART00000012450	7	21418045	21451037	1	BC044381.1	2580	2244	RNASEQT00000007866	21417551	21453142	5011	2244	2817	RNASEQG00000007866	15	15	16	15	14	14	0	14	14	0	3355	0	2580	14	2244	15	9693	21450780	21450780	257	2194	unchanged
ENSDARG00000003380	ENSDART00000012457	13	30878778	30885935	-1	BC155664.1	2688	1518	RNASEQT00000011862	30879368	30886173	2336	1533	1758	RNASEQG00000011862	7	7	7	7	6	6	0	6	6	0	523	0	2098	7	1518	7	3280	30879946	30879946	1168	578	unchanged
ENSDARG00000005870	ENSDART00000012478	9	24082865	24089584	1	BC074076.1	1443	894	RNASEQT00000016325	24082802	24089584	1506	894	1058	RNASEQG00000016325	8	7	8	7	7	7	0	6	6	0	2630	0	1443	8	894	7	6720	24089136	24089136	448	448	trim	445	0
ENSDARG00000019907	ENSDART00000012479	16	16867028	16882309	-1	BC081483.1	1329	1176	RNASEQT00000012806	16866694	16882358	1712	1176	1294	RNASEQG00000012806	9	9	9	9	8	8	0	8	8	0	1431	0	1329	9	1176	9	2848	16867112	16867112	84	418	unchanged
ENSDARG00000002685	ENSDART00000012483	7	25997669	26005493	-1	BC086831.1	1452	1248	RNASEQT00000007148	25982901	26005511	3376	1248	1369	RNASEQG00000007148	10	9	17	9	9	9	0	8	8	0	3667	0	1452	9	1248	9	5701	25997770	25997770	101	2007	trim	404	0
ENSDARG00000014321	ENSDART00000012506	9	767583	771313	-1	BC080209.1	1482	696	RNASEQT00000016028	767077	771293	1968	696	1124	RNASEQG00000016029	2	2	2	2	1	1	0	1	1	0	9	0	1462	2	696	2	394	767921	767921	338	844	trim	5	0
ENSDARG00000008541	ENSDART00000012540	23	18097179	18103860	1	BC054942.1	2040	1428	RNASEQT00000010054	18097015	18119331	2660	1446	1778	RNASEQG00000010054	12	11	12	11	11	9	0	10	8	0	3293	0	1197	10	1029	9	21798	18103416	18118449	444	882	unchanged
ENSDARG00000019496	ENSDART00000012582	9	26205376	26214955	-1	BC093144.1	1185	849	RNASEQT00000016367	26205448	26215061	1219	1005	1007	RNASEQG00000016367	9	8	9	9	8	7	1	7	6	1	4804	919	1113	9	849	7	6366	26205660	26205660	284	212	trim	441	0
ENSDARG00000013961	ENSDART00000012586	5	58779954	58793452	1	BC152191.1	779	567	RNASEQT00000006127	58770860	58797232	4554	567	757	RNASEQG00000006127	5	4	5	4	4	4	0	3	3	0	479	0	601	4	567	4	2009	58793435	58793435	17	3797	trim	157	0
ENSDARG00000017127	ENSDART00000012604	22	16778207	16788786	1	BC133073.1	3979	336	RNASEQT00000001476	16777875	16785742	1267	336	716	RNASEQG00000001476	4	4	4	4	3	3	0	3	3	0	99	0	935	4	336	4	2056	16785191	16785191	3595	551	unchanged
ENSDARG00000004953	ENSDART00000012627	1	6454949	6484171	1	BC162700.1	1819	1653	RNASEQT00000008341	6477189	6495872	1934	1551	1567	RNASEQG00000008341	12	11	10	10	11	9	0	10	9	0	263	0	493	2	482	2	579	6484075	6495505	96	367	trim	92	0
ENSDARG00000004658	ENSDART00000012637	7	8207680	8226400	-1	BC085445.1	1425	1185	RNASEQT00000007000	8206969	8226414	2150	1185	1231	RNASEQG00000007000	8	8	8	8	7	7	0	7	7	0	4103	0	1425	8	1185	8	8191	8207888	8207888	208	919	trim	353	0
ENSDARG00000055183	ENSDART00000012658	15	31660435	31697261	1	BC163113.1	1548	1431	RNASEQT00000017398	31660077	31700450	5000	1311	1786	RNASEQG00000017398	12	12	14	10	11	11	0	11	11	0	241	0	1548	11	1250	9	585	31697236	31697236	25	3214	extend	0	2693	26
ENSDARG00000016538	ENSDART00000012659	4	8538926	8547751	1	BC115067.1	1746	1671	RNASEQT00000021018	8538655	8548818	3084	1671	1988	RNASEQG00000021018	13	13	13	13	12	12	0	12	12	0	3424	0	1746	13	1671	13	7019	8547722	8547722	29	1096	unchanged
ENSDARG00000015851	ENSDART00000012670	17	12962890	12973533	1	BC056140.1	2590	2031	RNASEQT00000001798	12962830	12973528	2645	2004	2091	RNASEQG00000001798	9	9	9	9	8	8	0	8	8	0	8196	12	2585	9	2004	9	68825	12972974	12972974	559	554	trim	1182	0
ENSDARG00000004358	ENSDART00000012673	16	13772557	13799764	1	BC076127.1	1946	1023	RNASEQT00000012781	13772460	13799864	2143	1023	1357	RNASEQG00000012781	9	8	9	8	8	8	0	7	7	0	1323	1	1946	9	1023	8	5463	13799078	13799078	686	786	unchanged
ENSDARG00000014793	ENSDART00000012717	10	27703886	27728523	1	BC081648.1	2606	1599	RNASEQT00000024227	27703702	27727780	2047	1599	2014	RNASEQG00000024227	5	5	5	5	4	4	0	4	4	0	2219	1	1863	5	1599	5	27583	27727747	27727747	776	33	trim	755	0
ENSDARG00000003167	ENSDART00000012743	12	19569757	19579071	1	BC068352.1	2560	981	RNASEQT00000013425	19569744	19579724	2552	981	1136	RNASEQG00000013425	10	8	10	9	9	8	0	7	7	0	1216	0	1886	8	980	7	6890	19577593	19578308	1437	1416	trim	105	0
ENSDARG00000015657	ENSDART00000012758	8	54721321	54724687	1	BC067184.1	1506	762	RNASEQT00000023933	54720980	54724825	1985	762	1254	RNASEQG00000023933	3	2	3	2	2	2	0	1	1	0	1734	3	1506	3	762	2	39160	54724094	54724094	593	731	unchanged
ENSDARG00000020449	ENSDART00000012759	13	3593164	3605250	1	BC044136.1	1887	1035	RNASEQT00000011149	3592943	3605400	2258	1035	1382	RNASEQG00000011149	9	9	9	9	8	8	0	8	8	0	4534	1	1887	9	1035	9	14943	3604524	3604524	726	876	trim	183	0
ENSDARG00000010096	ENSDART00000012789	11	6187205	6209604	1	BC151992.1	2080	1683	RNASEQT00000000508	6187012	6209900	2569	1683	1970	RNASEQG00000000508	10	9	10	9	9	9	0	8	8	0	206	0	2080	10	1683	9	891	6209301	6209301	303	599	unchanged
ENSDARG00000008395	ENSDART00000012820	25	6788856	6800949	-1	BC062858.1	1482	1098	RNASEQT00000010434	6788856	6801079	1612	1098	1353	RNASEQG00000010434	9	8	9	8	8	8	0	7	7	0	6980	0	1482	9	1098	8	15545	6789115	6789115	259	259	trim	570	0
ENSDARG00000013973	ENSDART00000012826	20	37785101	37793910	1	BC046066.1	1937	1095	RNASEQT00000015531	37784842	37793909	2195	1095	1500	RNASEQG00000015531	12	12	12	12	11	11	0	11	11	0	2225	0	1936	12	1095	12	3989	37793214	37793214	696	695	trim	55	0
ENSDARG00000003281	ENSDART00000012844	5	22649908	22662855	-1	BC067191.1	2086	792	RNASEQT00000006482	22649889	22662962	2212	798	1033	RNASEQG00000006482	6	6	6	6	5	5	0	5	5	0	2549	1	2086	6	792	6	16756	22651068	22651068	1160	1179	unchanged
ENSDARG00000005945	ENSDART00000012855	21	26697193	26719165	1	BC076544.1	2741	2334	RNASEQT00000002948	26618452	26719165	3580	2334	3362	RNASEQG00000002948	20	20	21	20	19	19	0	19	19	0	20926	6	2714	19	2334	20	27262	26718947	26718947	218	218	trim	31	0
ENSDARG00000013966	ENSDART00000012859	20	16929037	16947061	-1	BC076196.1	880	741	RNASEQT00000015323	16929042	16947231	1045	741	1001	RNASEQG00000015323	7	7	7	7	6	6	0	6	6	0	3537	0	875	7	741	7	4695	16929086	16929086	49	44	trim	832	0
ENSDARG00000015312	ENSDART00000012873	1	34129684	34189398	1	BC066429.1	2325	1122	RNASEQT00000009128	34129579	34189584	2616	1122	1308	RNASEQG00000009128	6	5	6	5	5	5	0	4	4	0	455	1	2325	6	1122	5	3268	34188276	34188276	1122	1308	unchanged
ENSDARG00000015228	ENSDART00000012877	17	14859461	14870561	-1	BC053166.1	1743	1470	RNASEQT00000002314	14859004	14864624	1467	651	715	No match	16	16	6	8	15	12	0	15	12	0	125	0	991	4	651	7	352	14859670	14859756	209	752	unchanged
ENSDARG00000011841	ENSDART00000012888	5	32338301	32340901	1	BC059620.1	484	312	RNASEQT00000005905	32338060	32340905	729	312	628	RNASEQG00000005905	3	3	3	3	2	2	0	2	2	0	11541	0	484	3	312	3	20535	32340804	32340804	97	101	trim	674	0
ENSDARG00000003925	ENSDART00000012889	17	14553004	14553838	1	BC162899.1	835	756	RNASEQT00000002312	14548596	14556034	3314	0		No match	1	1	2	0	0	0	0	0	0	0	0	0	827	0	0	0	300	14553787		51	3314	unchanged
ENSDARG00000009941	ENSDART00000012923	25	21851165	21917075	1	BC171689.1	3014	2913	RNASEQT00000010565	21847784	21927857	4401	2901	3246	RNASEQG00000010565	17	17	19	16	16	14	0	16	14	0	924	3	3002	14	2901	16	2202	21917055	21917055	20	1155	trim	104	0
ENSDARG00000004026	ENSDART00000012932	17	394009	395548	-1	BC163414.1	1540	1473	0	0	0	0	0	0	0	1	1	0	0	0	0	0	0	0	0	0	0	0	0	0	0	128	394030	0	21	No match
ENSDARG00000001873	ENSDART00000012938	9	49173964	49201709	-1	BC056334.1	1839	1587	RNASEQT00000016564	49173964	49201770	1900	1587	1669	RNASEQG00000016564	12	12	12	12	11	11	0	11	11	0	6031	1	1839	12	1587	12	11550	49174195	49174195	231	231	trim	345	0
ENSDARG00000016463	ENSDART00000012963	23	32260397	32265776	1	BC083391.1	936	474	RNASEQT00000009775	32260276	32265776	1057	474	799	RNASEQG00000009775	6	6	6	6	5	5	0	5	5	0	2573	1	936	6	474	6	3485	32265518	32265518	258	258	trim	464	0
ENSDARG00000015863	ENSDART00000012990	2	30142503	30145177	1	EF195764.1	2675	1599	RNASEQT00000003905	30138274	30145175	3040	1599	2084	RNASEQG00000003905	1	1	2	1	0	0	0	0	0	0	1	0	2672	0	1599	1	15720	30144219	30144219	958	956	trim	90	0
ENSDARG00000007347	ENSDART00000013007	13	374023	386568	1	BC053183.1	1491	972	RNASEQT00000011601	373966	393986	1518	1053	1235	RNASEQG00000011601	3	3	4	4	2	2	0	2	2	0	937	0	1093	2	968	2	15332	386174	393703	394	283	unchanged
ENSDARG00000016065	ENSDART00000013021	1	16634839	16640104	1	BC107955.1	3143	2712	RNASEQT00000009016	16634864	16641239	4253	2712	2929	RNASEQG00000009016	5	4	5	4	4	4	0	3	3	0	71	0	3118	5	2712	4	1045	16639915	16639915	189	1324	unchanged
ENSDARG00000018303	ENSDART00000013033	12	29107270	29139725	1	AF168008.1	1813	1485	RNASEQT00000013523	29106667	29139724	2415	1485	2183	RNASEQG00000013523	12	12	12	12	11	11	0	11	11	0	4473	0	1812	12	1485	12	10300	29139492	29139492	233	232	trim	254	0
ENSDARG00000002402	ENSDART00000013066	6	8096617	8131279	1	BC045400.1	2754	2349	RNASEQT00000014265	8096473	8158547	3709	2532	2803	RNASEQG00000014265	15	15	16	16	14	14	0	14	14	0	2908	0	2338	14	2211	14	6244	8131001	8157641	278	906	trim	2	0
ENSDARG00000019239	ENSDART00000013076	2	50799422	50842251	-1	BC066480.1	3284	2334	RNASEQT00000004094	50799679	50842322	3134	2334	2740	RNASEQG00000004094	23	21	22	21	22	21	0	20	20	0	14566	2	3027	21	2334	21	23939	50800073	50800073	615	394	trim	262	0
ENSDARG00000012194	ENSDART00000013079	2	5647593	5682065	-1	BC063230.1	2241	1617	RNASEQT00000003668	5647594	5682255	2430	1617	1832	RNASEQG00000003668	16	16	16	16	15	15	0	15	15	0	6367	0	2240	16	1617	16	15272	5648192	5648192	599	598	trim	99	0
ENSDARG00000018788	ENSDART00000013082	18	24811207	24835541	-1	AY055462.1	2304	1146	RNASEQT00000005440	24810854	24835540	2656	1146	1754	RNASEQG00000005440	6	6	6	6	5	5	0	5	5	0	312	0	2303	6	1146	6	1878	24811756	24811756	549	902	unchanged
ENSDARG00000001888	ENSDART00000013103	13	10249048	10292746	-1	BC079530.1	1455	1173	RNASEQT00000011212	10245972	10296529	4959	1173	1643	RNASEQG00000011212	6	5	7	5	5	5	0	4	4	0	1708	1	1455	5	1173	5	5311	10249288	10249288	240	3316	trim	583	0
ENSDARG00000018716	ENSDART00000013111	9	18378955	18476807	1	BC155552.1	2130	1761	RNASEQT00000016240	18302084	18471145	6617	3708	3907	RNASEQG00000016239	16	16	30	30	15	13	0	15	13	0	489	0	1647	11	1596	11	2124	18476559	18468435	248	2710	extend	0	1804	0
ENSDARG00000011640	ENSDART00000013117	24	7799969	7812732	-1	BC095109.1	1944	1341	RNASEQT00000019592	7799969	7812854	2066	1341	1481	RNASEQG00000019592	9	9	9	9	8	8	0	8	8	0	2711	1	1944	9	1341	9	6944	7800554	7800554	585	585	confirmed
ENSDARG00000017780	ENSDART00000013140	2	50001569	50017101	1	DQ017628.1	1443	1443	RNASEQT00000004689	49987866	50017367	2064	1443	1798	RNASEQG00000004689	9	9	10	10	8	8	0	8	8	0	139	0	1436	8	1436	8	441	50017101	50017101	0	266	unchanged
ENSDARG00000002798	ENSDART00000013150	18	4486413	4495062	1	BC090428.1	2212	1905	0	0	0	0	0	0	0	5	5	0	0	4	4	0	4	4	0	538	0	0	0	0	0	4903	4494765	0	297	No match
ENSDARG00000018600	ENSDART00000013167	3	39176172	39185046	-1	BC090469.1	2467	1824	RNASEQT00000022009	39176172	39185103	2524	1824	1923	RNASEQG00000022009	11	11	11	11	10	10	0	10	10	0	7835	3	2467	11	1824	11	11135	39176773	39176773	601	601	trim	809	0
ENSDARG00000039007	ENSDART00000013194	23	44727908	44739795	1	AY398342.1	1461	1302	RNASEQT00000009881	44727895	44739808	1487	1302	1403	RNASEQG00000009881	12	11	12	11	11	11	0	10	10	0	111580	505	1461	12	1302	11	103776	44739724	44739724	71	84	trim	185	0
ENSDARG00000006963	ENSDART00000013203	11	5552986	5574420	1	BC066737.1	3520	2916	RNASEQT00000000081	5552882	5574420	3624	2916	3069	RNASEQG00000000081	25	24	25	24	24	24	0	23	23	0	16465	0	3520	25	2916	24	30953	5573865	5573865	555	555	trim	65	0
ENSDARG00000034862	ENSDART00000013209	1	15962	21248	1	BC095023.1	1809	1302	RNASEQT00000008284	15842	21248	1929	1302	1438	RNASEQG00000008284	8	8	8	8	7	7	0	7	7	0	219	0	1809	8	1302	8	991	20757	20757	491	491	trim	63	0
ENSDARG00000009473	ENSDART00000013214	8	24566475	24576376	1	AF342938.1	1101	1101	RNASEQT00000023150	24556332	24577984	3920	1554	2315	RNASEQG00000023150	7	7	8	7	6	5	0	6	5	0	733	0	1101	5	1101	5	3054	24576376	24576379	0	1605	trim	504	0
ENSDARG00000016477	ENSDART00000013258	2	7500152	7511588	1	BC055242.1	1824	843	RNASEQT00000003689	7500141	7511588	1835	1236	1281	RNASEQG00000003689	11	7	11	11	10	10	0	6	6	0	10144	1	1824	11	843	6	12918	7511034	7511034	554	554	trim	941	0
ENSDARG00000019838	ENSDART00000013263	1	22057631	22068476	-1	BC154794.1	2213	1482	RNASEQT00000008484	22057631	22068834	2571	1482	1944	RNASEQG00000008484	12	11	12	11	11	11	0	10	10	0	5228	0	2213	12	1482	11	15316	22058258	22058258	627	627	trim	1685	0
ENSDARG00000011488	ENSDART00000013278	15	6672435	6693573	1	BC045510.1	2521	1140	RNASEQT00000017178	6672383	6693572	2572	1140	1270	RNASEQG00000017178	16	16	16	16	15	15	0	15	15	0	4501	1	2520	16	1140	16	8798	6692270	6692270	1303	1302	trim	202	0
ENSDARG00000013976	ENSDART00000013294	24	6445338	6459077	-1	BC056562.1	2027	951	RNASEQT00000019585	6445338	6459213	2163	951	1095	RNASEQG00000019585	11	11	11	11	10	10	0	10	10	0	7100	0	2027	11	951	11	12702	6446406	6446406	1068	1068	trim	573	0
ENSDARG00000002174	ENSDART00000013313	4	16607318	16622180	1	BC092938.1	1482	1311	RNASEQT00000020753	16607213	16622181	1588	1311	1523	RNASEQG00000020753	12	12	12	12	11	11	0	11	11	0	1173	0	1482	12	1311	12	1968	16622116	16622116	64	65	trim	239	0
ENSDARG00000010301	ENSDART00000013343	20	6217379	6247957	-1	BC046890.1	2275	1146	RNASEQT00000015759	6214285	6248329	5741	1146	1802	RNASEQG00000015759	9	9	9	9	8	7	1	8	7	1	3437	501	2275	9	1146	9	15554	6218224	6218224	845	3939	unchanged
ENSDARG00000014554	ENSDART00000013360	12	17355580	17359764	1	BC060926.1	2600	954	RNASEQT00000013406	17355191	17359761	2986	954	1516	RNASEQG00000013406	2	2	2	2	1	1	0	1	1	0	157	0	2597	2	954	2	14065	17358291	17358291	1473	1470	trim	38	0
ENSDARG00000012192	ENSDART00000013376	3	58561605	58579057	-1	BC068371.1	1872	1215	RNASEQT00000022145	58561605	58579150	1965	1215	1410	RNASEQG00000022145	4	3	4	3	3	3	0	2	2	0	2325	0	1872	4	1215	3	7369	58562160	58562160	555	555	trim	181	0
ENSDARG00000019732	ENSDART00000013394	7	40059196	40070192	1	BC055216.1	1747	903	RNASEQT00000007320	40059121	40070190	1820	903	1044	RNASEQG00000007320	13	13	13	13	12	12	0	12	12	0	14710	4	1745	13	903	13	29296	40069414	40069414	778	776	trim	41	0
ENSDARG00000001950	ENSDART00000013404	5	74812581	74834818	-1	BC080261.1	776	585	RNASEQT00000006266	74812581	74837539	1009	585	993	RNASEQG00000006266	7	6	8	6	6	5	0	5	5	0	85102	541	770	5	585	6	86769	74812597	74812597	16	16	trim	3659	0
ENSDARG00000019791	ENSDART00000013409	7	17881511	17998770	1	BC093344.1	1781	1539	RNASEQT00000007049	17881464	17998629	1687	1539	1608	RNASEQG00000007049	16	16	16	16	15	15	0	15	15	0	3107	0	1640	16	1539	16	3553	17998550	17998550	220	79	trim	446	0
ENSDARG00000008840	ENSDART00000013431	5	32159266	32173442	1	BC053268.1	1989	1077	RNASEQT00000005901	32157391	32173437	2185	1086	1322	RNASEQG00000005901	14	14	14	14	13	13	0	13	13	0	2424	0	1913	13	1050	13	4053	32172574	32172574	868	863	trim	6	0
ENSDARG00000018181	ENSDART00000013432	9	36925627	36927977	-1	BC093182.1	1372	1131	RNASEQT00000016952	36925520	36928035	1537	1131	1326	RNASEQG00000016952	2	1	2	1	1	1	0	0	0	0	126	0	1372	2	1131	1	1675	36925731	36925731	104	211	unchanged
ENSDARG00000013063	ENSDART00000013434	8	32565325	32666501	1	BC078408.1	2101	1578	RNASEQT00000023244	32564914	32666501	2512	1578	2017	RNASEQG00000023244	17	17	17	17	16	15	1	16	15	1	8418	780	2101	17	1578	17	14286	32666006	32666006	495	495	trim	632	0
ENSDARG00000015638	ENSDART00000013440	17	12952212	12960724	1	BC092840.1	1044	762	RNASEQT00000001797	12952141	12960724	1115	786	945	RNASEQG00000001797	10	10	10	10	9	9	0	9	9	0	4016	1	1044	10	762	10	4425	12960554	12960554	170	170	trim	274	0
ENSDARG00000012929	ENSDART00000013446	8	38559758	38573986	-1	BC055196.1	2029	1773	RNASEQT00000023274	38559758	38574003	2046	1773	1953	RNASEQG00000023274	15	15	15	15	14	14	0	14	14	0	2818	2	2029	15	1773	15	4308	38559851	38559851	93	93	trim	535	0
ENSDARG00000008573	ENSDART00000013453	20	15897512	15962913	-1	BC115339.1	2232	1230	RNASEQT00000015314	15897506	15962963	2288	1230	1660	RNASEQG00000015314	9	7	9	7	8	8	0	6	6	0	1538	0	2232	9	1230	7	6030	15898134	15898134	622	628	trim	91	0
ENSDARG00000011683	ENSDART00000013454	2	12062931	12087538	-1	BC071440.1	1968	678	RNASEQT00000003738	12063608	12087822	1575	678	990	RNASEQG00000003738	9	9	9	9	8	8	0	8	8	0	9882	1	1291	9	678	9	18216	12064193	12064193	1262	585	trim	680	0
ENSDARG00000011785	ENSDART00000013465	12	4593169	4603347	1	BC163297.1	2701	2625	RNASEQT00000013289	4592491	4603581	3613	2625	3327	RNASEQG00000013289	8	8	8	8	7	7	0	7	7	0	126	0	2701	8	2625	8	1437	4603295	4603295	52	286	trim	191	0
ENSDARG00000002412	ENSDART00000013480	2	19237377	19288178	-1	BC083417.1	1380	948	RNASEQT00000003783	19237377	19256523	1714	948	1344	RNASEQG00000003783	8	7	8	7	7	7	0	6	6	0	4219	0	1349	7	948	7	16132	19237747	19237747	370	370	trim	261	0
ENSDARG00000014914	ENSDART00000013519	14	34449656	34456513	-1	BC090897.1	2368	1068	RNASEQT00000018295	34449656	34456597	2452	1068	1235	RNASEQG00000018295	6	6	6	6	5	5	0	5	5	0	22044	11	2368	6	1068	6	202640	34450873	34450873	1217	1217	extend	0	823	1
ENSDARG00000019345	ENSDART00000013525	13	15534790	15622688	1	BC047179.1	3395	2169	RNASEQT00000011247	15534438	15622688	3747	2169	2976	RNASEQG00000011247	16	16	16	16	15	15	0	15	15	0	7153	3	3395	16	2169	16	25025	15621917	15621917	771	771	trim	454	0
ENSDARG00000009040	ENSDART00000013540	3	17752918	17759735	-1	BC071353.1	1181	702	RNASEQT00000021726	17752917	17759899	1346	702	969	RNASEQG00000021726	5	5	5	5	4	4	0	4	4	0	2833	0	1181	5	702	5	6906	17753294	17753294	376	377	trim	18	0
ENSDARG00000004748	ENSDART00000013553	3	39468928	39483264	-1	BC077104.1	2546	1656	RNASEQT00000022012	39467974	39483420	3897	1965	2144	RNASEQG00000022012	11	7	10	10	10	8	1	6	5	1	8454	1404	2546	9	1656	6	20154	39469727	39469727	558	1753	extend	0	1404	1
ENSDARG00000010481	ENSDART00000013575	22	14261206	14270177	1	BC058875.1	2034	1260	RNASEQT00000001047	14261131	14270179	2111	1260	1438	RNASEQG00000001047	12	11	12	11	11	11	0	10	10	0	52777	20	2034	12	1260	11	163855	14269506	14269506	671	673	trim	2656	0
ENSDARG00000015153	ENSDART00000013581	21	1910470	1933748	1	AY423013.1	2558	2184	RNASEQT00000003187	1909041	1933520	4750	1698	4605	RNASEQG00000003187	15	15	15	12	14	13	0	14	13	0	682	0	2328	12	1664	11	2165	1933375	1933375	373	145	unchanged
ENSDARG00000006757	ENSDART00000013588	6	3492456	3502108	1	BC054912.1	2275	1818	RNASEQT00000014226	3492427	3502113	2309	1818	1944	RNASEQG00000014226	6	6	6	6	5	5	0	5	5	0	4441	0	2275	6	1818	6	18375	3501748	3501748	360	365	trim	1075	0
ENSDARG00000004256	ENSDART00000013590	5	38113768	38120273	1	AF067429.1	2125	1062	RNASEQT00000006615	38113101	38120816	3335	1062	1802	RNASEQG00000006615	5	5	5	5	4	4	0	4	4	0	447	0	2125	5	1062	5	11315	38119283	38119283	990	1533	unchanged
ENSDARG00000003641	ENSDART00000013591	9	31145802	31162066	1	BC065630.1	1799	1191	RNASEQT00000016416	31145693	31162066	1908	1191	1364	RNASEQG00000016416	8	7	8	7	7	7	0	6	6	0	9246	21	1799	8	1191	7	36324	31161522	31161522	544	544	trim	82	0
ENSDARG00000015824	ENSDART00000013604	4	11980752	11994539	-1	BC168502.1	3853	2526	0	0	0	0	0	0	0	13	13	0	0	12	12	0	12	12	0	9910	1	0	0	0	0	52458	11982073	0	1321	No match
ENSDARG00000005586	ENSDART00000013605	5	70529690	70657132	-1	BC129199.1	3572	2064	0	0	0	0	0	0	0	4	2	0	0	3	3	0	1	1	0	425	0	0	0	0	0	6115	70530769	0	1079	No match
ENSDARG00000020201	ENSDART00000013607	2	11737852	11789601	1	BC053163.1	1797	1566	RNASEQT00000003736	11737828	11794479	2545	1593	1625	RNASEQG00000003736	16	16	17	17	15	15	0	15	15	0	5098	0	1564	15	1556	15	5262	11789378	11793559	223	920	trim	178	0
ENSDARG00000005333	ENSDART00000013609	10	8107187	8298735	1	AY781336.1	7929	7617	RNASEQT00000024056	8107076	8299531	8845	7626	7875	RNASEQG00000024056	56	55	56	55	55	52	1	54	51	1	16367	303	7926	54	7614	53	26300	8298561	8298561	174	970	trim	133	0
ENSDARG00000014522	ENSDART00000013638	2	28217948	28270171	-1	BC090908.1	3242	2385	RNASEQT00000004432	28216668	28270219	4570	2385	2627	RNASEQG00000004432	12	11	12	11	11	11	0	10	10	0	1604	1	3242	12	2385	11	8753	28218611	28218611	663	1943	unchanged
ENSDARG00000032705	ENSDART00000013642	11	44267889	44270030	1	BC067725.1	2142	1002	0	0	0	0	0	0	0	1	1	0	0	0	0	0	0	0	0	0	0	0	0	0	0	8356	44269002	0	1028	No match
ENSDARG00000015865	ENSDART00000013659	6	19509793	19522056	1	BC045450.1	3068	1965	RNASEQT00000014374	19509751	19521301	2355	1965	2058	RNASEQG00000014374	11	11	11	11	10	10	0	10	10	0	2392	0	2313	11	1965	11	9310	19521004	19521004	1052	297	trim	58	0
ENSDARG00000012044	ENSDART00000013666	19	25031678	25041584	-1	BC081380.1	1410	657	RNASEQT00000025087	25031676	25042154	1982	666	1346	RNASEQG00000025087	8	7	8	7	7	7	0	6	6	0	11722	0	1410	8	657	7	39227	25032312	25032312	634	636	trim	271	0
ENSDARG00000017034	ENSDART00000013668	25	33452079	33474004	1	BC093431.1	1609	1338	RNASEQT00000010648	33451848	33498336	6010	1452	1629	RNASEQG00000010648	10	9	22	10	9	9	0	8	8	0	2435	0	1609	9	1338	8	3738	33473793	33473793	211	4381	trim	613	0
ENSDARG00000016717	ENSDART00000013682	18	5231152	5237604	-1	BC091548.1	1006	525	RNASEQT00000005264	5106116	5237707	938	525	664	RNASEQG00000005264	5	5	6	5	4	4	0	4	4	0	1865	0	607	4	525	5	4402	5231597	5231597	445	274	unchanged
ENSDARG00000015126	ENSDART00000013743	6	3678916	3689986	1	AY398354.1	2008	1305	RNASEQT00000014231	3678870	3689989	2057	1305	1472	RNASEQG00000014231	10	10	10	10	9	9	0	9	9	0	6753	2	2008	10	1305	10	17710	3689404	3689404	582	585	trim	32	0
ENSDARG00000002502	ENSDART00000013761	Zv9_scaffold3485	101761	106458	1	BC154027.1	897	573	RNASEQT00000019028	101455	167101	1981	1236	1557	RNASEQG00000019028	3	3	9	9	2	2	0	2	2	0	44	0	570	2	555	2	220	106149	166677	309	424	unchanged
ENSDARG00000005078	ENSDART00000013768	23	10830274	10851514	-1	BC096972.1	2812	675	RNASEQT00000010003	10830175	10851567	2964	675	876	RNASEQG00000010003	7	7	7	7	6	6	0	6	6	0	3852	1	2812	7	675	7	30859	10832263	10832263	1989	2088	unchanged
ENSDARG00000057683	ENSDART00000013781	6	12880066	12897308	1	BC133090.1	3171	2493	RNASEQT00000014322	12880010	12897311	3230	2493	2590	RNASEQG00000014322	17	17	17	17	16	16	0	16	16	0	8771	4	3171	17	2493	17	20229	12896671	12896671	637	640	trim	5	0
ENSDARG00000015930	ENSDART00000013787	16	34512025	34518907	-1	BC076273.1	982	561	RNASEQT00000012446	34512025	34519087	1164	723	975	RNASEQG00000012446	8	7	7	7	7	5	1	6	4	1	5742	851	982	6	561	4	13330	34512473	34512214	349	189	trim	3797	0
ENSDARG00000003290	ENSDART00000013794	2	2542618	2589180	-1	BC115171.1	1119	684	RNASEQT00000003633	2537460	2589205	7141	1563	1990	RNASEQG00000003633	8	7	15	13	7	6	0	6	5	0	86	0	999	6	597	5	372	2542651	2543106	33	5151	extend	0	4806	71
ENSDARG00000014357	ENSDART00000013803	22	21068970	21081954	-1	AY881649.1	1650	1650	RNASEQT00000001512	21068934	21079557	1300	1176	1264	RNASEQG00000001512	7	7	5	5	6	5	0	6	5	0	17	0	1262	4	1176	4	113	21068970	21068970	0	36	unchanged
ENSDARG00000012892	ENSDART00000013814	21	43245378	43267961	-1	BC067667.1	1323	969	RNASEQT00000003122	43240167	43268793	7366	969	1810	RNASEQG00000003122	6	6	6	6	5	5	0	5	5	0	2510	1	1323	6	969	6	7371	43245723	43245723	345	5556	extend	0	4111	102
ENSDARG00000014171	ENSDART00000013835	22	10232912	10238159	-1	BC135064.1	1595	378	RNASEQT00000001399	10233784	10238241	805	378	525	RNASEQG00000001399	4	4	4	4	3	3	0	3	3	0	694	0	723	4	378	4	1869	10234064	10234064	1152	280	unchanged
ENSDARG00000014361	ENSDART00000013839	4	12035780	12043396	-1	BC057432.1	1763	711	RNASEQT00000020698	12035774	12043494	1867	711	887	RNASEQG00000020698	7	7	7	7	6	6	0	6	6	0	3295	0	1763	7	711	7	17842	12036754	12036754	974	980	trim	339	0
ENSDARG00000018478	ENSDART00000013863	2	22134661	22146269	-1	BC056520.1	1564	1272	RNASEQT00000004373	22133422	22147609	4143	1272	2620	RNASEQG00000004373	11	11	11	11	10	10	0	10	10	0	3842	0	1564	11	1272	11	7559	22134945	22134945	284	1523	unchanged
ENSDARG00000007359	ENSDART00000013870	8	53222229	53231318	1	BC049498.1	821	474	RNASEQT00000023378	53222226	53231315	821	474	597	RNASEQG00000023378	4	4	4	4	3	3	0	3	3	0	1259	0	818	4	474	4	4839	53231091	53231091	227	224	trim	209	0
ENSDARG00000011493	ENSDART00000013894	24	41092011	41108212	1	BC152487.1	2542	894	RNASEQT00000019905	41091343	41108212	3292	894	1841	RNASEQG00000019905	5	2	4	2	4	3	0	1	1	0	941	2	2542	3	894	2	12728	41106761	41106761	1369	1451	extend	0	280	50
ENSDARG00000008982	ENSDART00000013918	9	34130599	34140462	-1	BC075775.1	2773	1230	RNASEQT00000016453	34131718	34140708	1843	1173	1639	RNASEQG00000016453	11	11	12	12	10	10	0	10	10	0	8410	26	1597	10	1173	10	14228	34131922	34131922	1323	204	trim	130	0
ENSDARG00000004592	ENSDART00000013924	4	2491761	2494496	1	BC135012.1	2488	1257	RNASEQT00000020947	2490107	2495242	3936	1383	2509	RNASEQG00000020947	2	1	3	2	1	1	0	0	0	0	60	0	2488	1	1257	0	1512	2493815	2493815	681	1427	unchanged
ENSDARG00000008049	ENSDART00000013933	22	10650601	10651865	-1	BC085463.1	863	456	0	0	0	0	0	0	0	3	2	0	0	2	2	0	1	1	0	4448	1	0	0	0	0	26663	10650833	0	232	No match
ENSDARG00000006003	ENSDART00000013961	13	36305929	36309610	-1	BC067723.1	1763	1119	RNASEQT00000011453	36305934	36309977	2125	1119	1600	RNASEQG00000011453	3	2	3	2	2	2	0	1	1	0	1671	0	1758	3	1119	2	44247	36306459	36306459	530	525	trim	120	0
ENSDARG00000007015	ENSDART00000014000	1	60305460	60313172	1	BC068422.1	2364	1431	RNASEQT00000009462	60305460	60312392	1584	1461	1582	RNASEQG00000009462	7	7	7	7	6	6	0	6	6	0	161	2	1584	7	1419	7	2194	60312402	60312390	770	2	unchanged
ENSDARG00000004904	ENSDART00000014007	4	15868206	15892508	-1	BC095660.1	2592	2106	RNASEQT00000021106	15849005	15896557	3812	2076	2727	RNASEQG00000021106	16	16	19	17	15	15	0	15	15	0	1638	0	2106	14	2071	15	3178	15868483	15852156	277	1085	unchanged
ENSDARG00000002986	ENSDART00000014013	5	27352921	27367608	-1	BC095728.1	1912	1353	RNASEQT00000005842	27353164	27367708	1769	1353	1466	RNASEQG00000005842	14	14	14	14	13	13	0	13	13	0	754	0	1669	14	1353	14	2028	27353467	27353467	546	303	trim	163	0
ENSDARG00000014190	ENSDART00000014020	2	5368892	5371222	-1	BC162710.1	379	324	RNASEQT00000004244	5368604	5371224	669	324	356	RNASEQG00000004244	2	2	2	2	1	1	0	1	1	0	42	0	379	2	324	2	306	5368917	5368917	25	313	unchanged
ENSDARG00000007449	ENSDART00000014021	3	30023937	30042578	-1	BC055226.1	2023	1080	RNASEQT00000021862	30023938	30042826	2270	1080	1438	RNASEQG00000021862	12	11	12	11	11	11	0	10	10	0	12338	9	2022	12	1080	11	15605	30024770	30024770	833	832	trim	441	0
ENSDARG00000021380	ENSDART00000014028	5	58324075	58333931	-1	BC085539.1	1894	1605	RNASEQT00000006122	58323434	58334096	2700	1605	1841	RNASEQG00000006122	6	6	6	6	5	5	0	5	5	0	709	0	1894	6	1605	6	4620	58324293	58324293	218	859	trim	103	0
ENSDARG00000012219	ENSDART00000014031	5	39344806	39357950	1	BC083281.1	1659	1203	RNASEQT00000006628	39344730	39361223	5008	1203	1291	RNASEQG00000006628	11	11	11	11	10	10	0	10	10	0	1703	0	1659	11	1203	11	3542	39357506	39357506	444	3717	unchanged
ENSDARG00000014594	ENSDART00000014034	5	67531654	67546733	-1	AY178794.1	1662	1029	RNASEQT00000006200	67503837	67547126	3693	1029	1318	RNASEQG00000006200	12	12	25	12	11	11	0	11	11	0	19268	0	1660	10	1029	12	24236	67532272	67532272	618	2375	trim	53	0
ENSDARG00000002663	ENSDART00000014036	4	7196609	7207359	1	BC063986.1	2344	1554	RNASEQT00000020640	7196618	7208461	3437	1575	1777	RNASEQG00000020640	14	13	14	13	13	13	0	12	12	0	3198	0	2335	14	1554	13	5893	7206801	7206801	558	1660	extend	0	889	115
ENSDARG00000006719	ENSDART00000014046	8	31467961	31509755	1	AY884302.1	3950	3399	RNASEQT00000023226	31448513	31510987	5396	3399	3650	RNASEQG00000023226	16	16	17	16	15	14	1	15	14	1	2076	297	3950	15	3399	16	8415	31509241	31509241	514	1746	trim	10	0
ENSDARG00000006678	ENSDART00000014047	9	30155353	30354949	-1	AF132082.1	2409	1728	RNASEQT00000016866	30155333	30354989	2469	1728	1870	RNASEQG00000016866	14	13	14	13	13	12	1	12	11	1	132	7	2409	14	1728	13	445	30155932	30155932	579	599	unchanged
ENSDARG00000004774	ENSDART00000014049	5	57275954	57323452	-1	AY648830.1	2916	2691	RNASEQT00000006777	57275494	57323482	3406	2691	2845	RNASEQG00000006777	23	23	23	23	22	22	0	22	22	0	7576	0	2916	23	2691	23	9811	57276055	57276055	101	561	unchanged
ENSDARG00000018061	ENSDART00000014052	25	27693844	27699778	-1	BC049408.1	1481	1317	RNASEQT00000010604	27693845	27699913	1615	1317	1492	RNASEQG00000010604	11	10	11	10	10	10	0	9	9	0	4351	0	1480	11	1317	10	6243	27693968	27693968	124	123	trim	184	0
ENSDARG00000015557	ENSDART00000014058	21	28141664	28188472	1	BC078288.1	2099	924	RNASEQT00000002964	28141413	28188472	2350	924	1359	RNASEQG00000002964	8	7	8	7	7	7	0	6	6	0	1926	2	2099	8	924	7	9103	28187481	28187481	991	991	trim	568	0
ENSDARG00000009438	ENSDART00000014062	11	23429783	23432768	-1	AF202639.1	1362	771	RNASEQT00000000214	23429784	23433160	1753	771	1275	RNASEQG00000000214	3	3	3	3	2	2	0	2	2	0	322	1	1361	3	771	3	2592	23430262	23430262	479	478	trim	253	0
ENSDARG00000019924	ENSDART00000014088	2	9852732	9865826	1	BC049446.1	1526	660	RNASEQT00000003714	9852568	9865826	1527	591	740	RNASEQG00000003714	6	6	7	6	5	5	0	5	5	0	6020	4	1424	5	591	6	20878	9865039	9865039	787	787	trim	221	0
ENSDARG00000015649	ENSDART00000014095	14	31845045	31852357	-1	BC083208.1	1326	552	RNASEQT00000018265	31845045	31852958	1927	552	1189	RNASEQG00000018265	3	2	3	2	2	2	0	1	1	0	2874	2	1326	3	552	2	28120	31848339	31848339	738	738	trim	863	0
ENSDARG00000001804	ENSDART00000014103	3	57615700	57625915	1	BC093225.1	838	600	RNASEQT00000022840	57615626	57625952	949	600	711	RNASEQG00000022840	7	7	7	7	6	6	0	6	6	0	1851	0	838	7	600	7	921	57625714	57625714	201	238	unchanged
ENSDARG00000078044	ENSDART00000014124	12	43009019	43166389	1	BC066723.1	2206	1344	RNASEQT00000013619	43008872	43170897	6861	1347	1611	RNASEQG00000013619	10	10	10	10	9	9	0	9	9	0	4861	0	2131	9	1269	9	17978	43165647	43165647	742	5250	extend	0	4284	0
ENSDARG00000021233	ENSDART00000014137	3	53322590	53338595	1	BC080227.1	1899	342	RNASEQT00000022105	53322562	53338630	1962	765	860	RNASEQG00000022105	6	3	6	5	5	5	0	2	2	0	1525	0	1899	6	342	2	3348	53337528	53337528	1067	1102	trim	556	0
ENSDARG00000009961	ENSDART00000014140	16	45917537	45958497	1	BC085369.1	1817	1353	RNASEQT00000013081	45917506	45958590	1941	1353	1502	RNASEQG00000013081	11	11	11	11	10	10	0	10	10	0	125	0	1817	11	1353	11	492	45958151	45958151	346	439	unchanged
ENSDARG00000018658	ENSDART00000014152	23	4267272	4276621	-1	BC072724.1	1377	1155	RNASEQT00000009510	4267272	4276875	1554	1155	1360	RNASEQG00000009510	4	3	6	3	3	3	0	2	2	0	797	1	1377	3	1155	3	4734	4267466	4267466	194	194	trim	536	0
ENSDARG00000005891	ENSDART00000014153	4	10869193	10875295	-1	BC066624.1	1868	897	RNASEQT00000020680	10869200	10875424	1990	897	1133	RNASEQG00000020680	9	9	9	9	8	8	0	8	8	0	3912	1	1861	9	897	9	10089	10870057	10870057	864	857	trim	209	0
ENSDARG00000020133	ENSDART00000014166	20	46837684	46845680	1	BC076313.1	1083	471	RNASEQT00000016186	46837690	46845684	1084	471	590	RNASEQG00000016185	4	3	4	3	3	3	0	2	2	0	483	0	1077	3	471	3	2003	46845190	46845190	490	494	unchanged
ENSDARG00000021443	ENSDART00000014168	20	9756207	9761281	-1	BC063991.1	3023	1047	RNASEQT00000015284	9756208	9761441	3182	1092	1351	RNASEQG00000015284	2	2	2	2	1	1	0	1	1	0	754	1	3022	2	1047	2	27821	9758039	9758039	1832	1831	trim	60	0
ENSDARG00000015674	ENSDART00000014176	13	24886148	24888552	1	BC071302.1	2002	822	0	0	0	0	0	0	0	2	2	0	0	1	1	0	1	1	0	257	12	0	0	0	0	4233	24887463	0	1089	No match
ENSDARG00000008748	ENSDART00000014188	18	15457186	15472232	1	BC044461.1	1788	465	RNASEQT00000004951	15456982	15472238	1998	465	775	RNASEQG00000004951	4	4	4	4	3	3	0	3	3	0	6791	0	1788	4	465	4	63790	15471015	15471015	1217	1223	trim	668	0
ENSDARG00000014196	ENSDART00000014207	9	40046542	40057626	-1	BC065629.1	1105	573	RNASEQT00000016510	40046542	40058188	1667	573	1183	RNASEQG00000016510	6	6	6	6	5	5	0	5	5	0	62720	15	1105	6	573	6	187065	40047026	40047026	484	484	trim	144	0
ENSDARG00000016460	ENSDART00000014210	17	15480578	15481706	-1	BC162731.1	1129	1080	RNASEQT00000002326	15479588	15498268	2650	0		No match	1	1	3	0	0	0	0	0	0	0	0	0	1108	0	0	0	465	15480598		20	2650	unchanged
ENSDARG00000012927	ENSDART00000014222	23	8825844	8839953	-1	BC046074.1	1697	906	RNASEQT00000009557	8825841	8840131	1878	906	1237	RNASEQG00000009557	10	10	10	10	9	8	1	9	8	1	1998	252	1697	10	906	10	3895	8826482	8826482	638	641	trim	274	0
ENSDARG00000020494	ENSDART00000014232	1	53762199	53773117	-1	BC046062.1	1678	963	RNASEQT00000008751	53762200	53773467	1567	963	1415	RNASEQG00000008751	10	9	11	9	9	9	0	8	8	0	4110	0	1217	9	963	9	10848	53762812	53762812	613	152	trim	109	0
ENSDARG00000018508	ENSDART00000014252	5	19701184	19827183	1	AY871211.1	3910	2256	RNASEQT00000005733	19701214	19829279	5976	2256	2510	RNASEQG00000005733	11	11	11	11	10	10	0	10	10	0	1592	0	3880	11	2256	11	7531	19825813	19825813	1370	3466	extend	0	2060	0
ENSDARG00000075128	ENSDART00000014270	15	30724320	30726367	1	AF012746.1	2048	987	RNASEQT00000017836	30724212	30725373	1162	987	1108	RNASEQG00000017836	1	1	1	1	0	0	0	0	0	0	0	0	1054	1	987	1	48	30725319	30725319	1048	54	unchanged
ENSDARG00000005095	ENSDART00000014274	25	8182164	8188653	-1	BC114251.1	2421	1758	RNASEQT00000010448	8182164	8188710	2478	1758	1960	RNASEQG00000010448	4	3	4	3	3	3	0	2	2	0	126	0	2421	4	1758	3	2275	8182682	8182682	518	518	trim	3	0
ENSDARG00000003411	ENSDART00000014296	17	42391857	42394352	-1	BC086703.1	1767	1230	RNASEQT00000002047	42391852	42394478	1898	1230	1595	RNASEQG00000002047	2	2	2	2	1	1	0	1	1	0	56	0	1767	2	1230	2	1980	42392155	42392155	298	303	trim	8	0
ENSDARG00000006272	ENSDART00000014306	17	34353762	34406643	1	AF510111.1	3048	2112	RNASEQT00000002009	34353665	34409463	5965	2112	2547	RNASEQG00000002009	15	13	15	13	14	14	0	12	12	0	2161	0	3048	15	2112	13	5433	34406045	34406045	598	3418	extend	0	2156	0
ENSDARG00000006308	ENSDART00000014323	8	10186087	10229693	-1	BC091656.1	2372	1542	RNASEQT00000023534	10186322	10229775	2219	1545	1784	RNASEQG00000023534	17	17	17	17	16	16	0	16	16	0	421	0	2137	17	1542	17	1038	10186757	10186757	670	435	unchanged
ENSDARG00000009881	ENSDART00000014330	22	16719767	16721124	1	BC154275.1	1358	813	0	0	0	0	0	0	0	1	1	0	0	0	0	0	0	0	0	0	0	0	0	0	0	20709	16720648	0	476	No match
ENSDARG00000071691	ENSDART00000014379	12	11503765	11520725	-1	BC071551.1	1654	1365	RNASEQT00000013372	11503765	11520915	1844	1365	1612	RNASEQG00000013372	14	14	14	14	13	13	0	13	13	0	23565	3	1654	14	1365	14	24140	11503997	11503997	232	232	trim	373	0
ENSDARG00000004648	ENSDART00000014411	14	24716039	24716956	1	AY763407.1	918	858	RNASEQT00000018195	24715376	24758661	7023	1239	1929	RNASEQG00000018195	1	1	2	2	0	0	0	0	0	0	0	0	832	0	805	0	237	24716923	24753567	33	5094	extend	0	4176	26
ENSDARG00000017906	ENSDART00000014473	25	30047197	30052933	-1	BC097215.1	633	426	RNASEQT00000010620	29941850	30053163	863	426	691	RNASEQG00000010620	5	4	5	4	4	3	0	3	3	0	721	0	347	3	312	3	12446	30047462	29942115	172	172	trim	130	0
ENSDARG00000007901	ENSDART00000014485	20	49386886	49408359	1	BC044369.1	2367	2262	RNASEQT00000015622	49386613	49408363	3935	1692	3877	RNASEQG00000015622	14	14	13	9	13	12	0	13	12	0	4220	1	2367	12	1643	8	11918	49408305	49408305	54	58	trim	222	0
ENSDARG00000021979	ENSDART00000014496	18	10232993	10295484	1	BC059615.1	2298	2019	RNASEQT00000004909	10219137	10372507	10151	6810	7063	RNASEQG00000004909	14	13	41	40	13	13	0	12	12	0	1501	0	2121	12	2019	12	3218	10295484	10369419	0	3088	extend	0	1926	0
ENSDARG00000012453	ENSDART00000014536	12	18269113	18390888	1	BC075985.1	1412	1035	RNASEQT00000013852	18269003	18433097	1693	1032	1204	RNASEQG00000013852	7	7	8	7	6	6	0	6	6	0	587	0	1100	5	1032	6	1666	18390573	18390573	315	489	unchanged
ENSDARG00000020122	ENSDART00000014538	21	40552713	40562236	-1	BC095160.1	1030	849	RNASEQT00000003097	40552713	40562461	1255	849	1177	RNASEQG00000003097	7	6	7	6	6	6	0	5	5	0	653	0	1030	7	849	6	1121	40552791	40552791	78	78	trim	74	0
ENSDARG00000008200	ENSDART00000014546	17	24274510	24298733	1	BC067564.1	2136	1479	RNASEQT00000001902	24273502	24298739	2654	1665	2068	RNASEQG00000001902	10	9	10	10	9	9	0	8	8	0	4630	0	2094	9	1479	8	16132	24298153	24298153	580	586	trim	1255	0
ENSDARG00000006915	ENSDART00000014552	6	42883372	42902332	-1	BC065942.1	1508	561	RNASEQT00000014589	42883372	42902502	1678	561	787	RNASEQG00000014589	7	7	7	7	6	6	0	6	6	0	2729	0	1508	7	561	7	7291	42884263	42884263	891	891	trim	402	0
ENSDARG00000026247	ENSDART00000014582	18	49130566	49211015	1	BC155798.1	1738	864	RNASEQT00000005601	49130088	49211300	2749	864	2340	RNASEQG00000005601	4	3	5	3	3	3	0	2	2	0	124	0	1738	4	864	3	1765	49210891	49210891	124	409	unchanged
ENSDARG00000010853	ENSDART00000014602	16	44140226	44257425	-1	BC152681.1	2590	570	RNASEQT00000013054	44140035	44257604	2962	0	874	No match	6	4	5	0	5	3	0	3	2	0	847	0	853	1	0	0	34599	44239872	44142123	1895	2088	unchanged
ENSDARG00000015266	ENSDART00000014608	1	22850481	22852291	1	BC065628.1	1811	1080	0	0	0	0	0	0	0	1	1	0	0	0	0	0	0	0	0	1	1	0	0	0	0	9119	22851898	0	393	No match
ENSDARG00000005456	ENSDART00000014632	7	53614154	53740410	1	BC047819.1	2507	2085	RNASEQT00000007431	53609250	53740410	4501	2085	4201	RNASEQG00000007431	19	18	24	18	18	18	0	17	17	0	4336	0	2482	18	2085	18	7321	53740110	53740110	300	300	trim	133	0
ENSDARG00000014333	ENSDART00000014660	9	42098074	42107215	1	BC068376.1	1635	462	RNASEQT00000016517	42097825	42107215	1884	462	784	RNASEQG00000016517	4	3	4	3	3	3	0	2	2	0	2065	1	1635	4	462	3	12215	42106115	42106115	1100	1100	trim	18	0
ENSDARG00000010958	ENSDART00000014661	6	28684309	28694552	-1	BC163129.1	1868	1758	RNASEQT00000014958	28681793	28694696	4528	1758	1989	RNASEQG00000014958	18	18	18	18	17	17	0	17	17	0	1199	0	1868	18	1758	18	1552	28684332	28684332	23	2539	unchanged
ENSDARG00000002792	ENSDART00000014666	5	32141271	32155663	-1	BC045318.1	3033	1530	RNASEQT00000005900	32141265	32155768	3144	1530	1804	RNASEQG00000005900	10	10	10	10	9	9	0	9	9	0	5445	4	3033	10	1530	10	34319	32142605	32142605	1334	1340	trim	2	0
ENSDARG00000002600	ENSDART00000014668	21	10109018	10146283	1	FJ373314.1	2268	2268	RNASEQT00000002790	10108767	10152414	8650	2268	2519	RNASEQG00000002790	14	14	14	14	13	13	0	13	13	0	1356	0	2268	14	2268	14	3000	10146283	10146283	0	6131	extend	0	4148	0
ENSDARG00000002779	ENSDART00000014696	24	22292143	22294651	1	BC078192.1	1108	741	RNASEQT00000020112	22289092	22294814	4322	783	3882	RNASEQG00000020112	2	2	2	2	1	1	0	1	1	0	46	0	1108	2	741	2	750	22294374	22294374	277	440	unchanged
ENSDARG00000017180	ENSDART00000014702	2	4348536	4353827	1	BC090541.1	1408	273	RNASEQT00000003651	4310605	4353827	5073	3831	3938	RNASEQG00000003651	3	3	25	25	2	2	0	2	2	0	960	0	1408	2	273	2	16776	4352692	4352692	1135	1135	trim	493	0
ENSDARG00000015890	ENSDART00000014703	18	29352112	29355131	1	BC065941.1	3020	978	RNASEQT00000005461	29351369	29530851	5475	1002	2139	RNASEQG00000005461	1	1	3	2	0	0	0	0	0	0	0	0	1368	0	974	0	4512	29353483	29363210	1648	3336	unchanged
ENSDARG00000016607	ENSDART00000014721	20	16245548	16263591	-1	BC067609.1	1295	960	RNASEQT00000015820	16245266	16263911	1897	960	1326	RNASEQG00000015820	9	9	9	9	8	8	0	8	8	0	1011	0	1295	9	960	9	1188	16245837	16245837	289	571	unchanged
ENSDARG00000005513	ENSDART00000014723	23	18036741	18045058	1	BC122432.1	844	648	RNASEQT00000009607	18036481	18045058	1001	648	896	RNASEQG00000009607	8	7	9	7	7	7	0	6	6	0	125065	8	844	7	648	7	106529	18044953	18044953	105	105	trim	406	0
ENSDARG00000006025	ENSDART00000014726	18	27384857	27515547	1	BC124630.1	1273	570	0	0	0	0	0	0	0	8	6	0	0	7	7	0	5	5	0	1739	0	0	0	0	0	4283	27515140	0	407	No match
ENSDARG00000006225	ENSDART00000014727	1	45661399	45670764	-1	BC071505.1	1609	1284	RNASEQT00000008666	45661399	45670812	1657	1284	1414	RNASEQG00000008666	10	9	10	9	9	9	0	8	8	0	33217	1	1609	10	1284	9	54483	45661642	45661642	243	243	trim	6	0
ENSDARG00000008383	ENSDART00000014729	3	40790893	40799236	1	AY398313.1	1685	1113	RNASEQT00000022032	40790847	40798957	1452	1113	1354	RNASEQG00000022032	10	9	10	9	9	9	0	8	8	0	46552	9	1406	10	1113	9	38314	40798859	40798859	377	98	trim	287	0
ENSDARG00000036190	ENSDART00000014774	19	21275615	21279205	1	BC083448.1	792	429	RNASEQT00000025064	21267875	21279199	5786	0	3179	No match	4	3	7	0	3	3	0	2	2	0	4104	0	786	3	0	0	8751	21279022	21273793	183	2607	trim	733	0
ENSDARG00000010482	ENSDART00000014785	2	20566497	20584571	1	BC050178.1	1953	1461	RNASEQT00000004357	20567689	20592384	1798	1461	1608	RNASEQG00000004357	14	13	15	13	13	12	0	12	12	0	1382	0	1673	11	1461	13	3967	20584156	20584156	415	190	unchanged
ENSDARG00000016536	ENSDART00000014806	5	24575014	24614052	1	BC163256.1	2683	2538	RNASEQT00000005787	24491168	24618397	7594	2538	3149	RNASEQG00000005787	21	21	22	21	20	20	0	20	20	0	1465	0	2683	20	2538	21	2476	24613952	24613952	100	4445	extend	0	1858	16
ENSDARG00000042525	ENSDART00000014822	5	70387132	70436314	1	AF072657.1	2900	1737	RNASEQT00000006233	70387096	70436181	2803	1737	2184	RNASEQG00000006233	16	16	16	16	15	15	0	15	15	0	1185	1	2767	16	1737	16	2176	70435562	70435562	752	619	trim	150	0
ENSDARG00000018744	ENSDART00000014823	4	13409098	13414203	1	FJ475111.1	971	681	RNASEQT00000021086	13409254	13414322	1027	516	649	RNASEQG00000021086	5	5	4	4	4	3	0	4	3	0	14	0	908	3	516	3	91	13413944	13413944	259	378	unchanged
ENSDARG00000001881	ENSDART00000014825	23	14209639	14292297	1	DQ372946.1	2049	1320	RNASEQT00000010032	14209470	14293164	3085	1320	1587	RNASEQG00000010032	15	14	15	14	14	14	0	13	13	0	137	0	2049	15	1320	14	397	14283576	14283576	631	1498	unchanged
ENSDARG00000003206	ENSDART00000014865	23	34358972	34496540	1	BC082793.1	1121	720	RNASEQT00000009797	34358796	34496540	1205	720	916	RNASEQG00000009797	8	8	9	8	7	7	0	7	7	0	2823	0	1038	7	720	8	3491	34496251	34496251	289	289	trim	27	0
ENSDARG00000016649	ENSDART00000014871	11	42944035	42951294	1	BC076040.1	1308	972	RNASEQT00000000381	42943693	42951285	1641	1062	1429	RNASEQG00000000381	7	7	7	7	6	6	0	6	6	0	2939	0	1299	7	972	7	7273	42951073	42951073	221	212	trim	453	0
ENSDARG00000014472	ENSDART00000014887	11	45992023	46009554	1	BC045939.1	1507	1221	RNASEQT00000000410	45991951	46009553	1578	1221	1402	RNASEQG00000000410	12	12	12	12	11	11	0	11	11	0	31642	2	1506	12	1221	12	32123	46009377	46009377	177	176	trim	18	0
ENSDARG00000015495	ENSDART00000014916	1	17336043	17356928	-1	BC066635.1	3218	987	RNASEQT00000008431	17336043	17357141	3431	987	1372	RNASEQG00000008431	7	6	7	6	6	6	0	5	5	0	2252	0	3218	7	987	6	15744	17338102	17338102	2059	2059	trim	525	0
ENSDARG00000015337	ENSDART00000014939	8	9004025	9025412	1	BC097207.1	869	432	RNASEQT00000022981	9003925	9025412	2782	771	934	RNASEQG00000022981	5	4	6	5	4	3	0	3	2	0	383	17	869	3	407	2	2325	9025038	9023564	374	1848	extend	0	1627	58
ENSDARG00000015990	ENSDART00000014945	11	26369999	26394895	-1	BC142544.1	6964	5409	RNASEQT00000000252	26369999	26395605	6816	5409	6207	RNASEQG00000000252	28	27	29	27	27	27	0	26	26	0	18676	83	6106	27	5409	27	95460	26371466	26371466	1467	609	trim	1321	0
ENSDARG00000013734	ENSDART00000014956	16	45667787	45681447	1	BC083309.1	1247	639	RNASEQT00000012537	45667731	45681447	1303	642	878	RNASEQG00000012537	8	7	8	7	7	7	0	6	6	0	1678	0	1247	8	639	7	2544	45681022	45681022	425	425	trim	44	0
ENSDARG00000033738	ENSDART00000014983	23	28620343	28631398	1	AY391442.1	994	456	RNASEQT00000009734	28620154	28631402	1187	594	679	RNASEQG00000009734	6	6	6	6	5	5	0	5	5	0	23856	0	994	6	456	6	61723	28630894	28630894	504	508	trim	21	0
ENSDARG00000018871	ENSDART00000015000	20	33768691	33773780	1	BC092772.1	1405	1209	RNASEQT00000015485	33763599	33773780	3335	1209	3237	RNASEQG00000015485	6	6	13	6	5	5	0	5	5	0	422	0	1405	5	1209	6	1999	33773682	33773682	98	98	trim	1432	0
ENSDARG00000018325	ENSDART00000015007	1	49921704	49938543	1	BC129310.1	2674	2271	RNASEQT00000008702	49921710	49938543	2668	2232	2270	RNASEQG00000008702	11	11	11	11	10	10	0	10	10	0	2715	3	2668	11	2232	11	10039	49938145	49938145	398	398	trim	704	0
ENSDARG00000015273	ENSDART00000015016	22	41808075	41823292	1	BC091940.1	1868	1599	RNASEQT00000001682	41808056	41837428	3542	1599	1673	RNASEQG00000001682	11	11	23	11	10	9	1	10	9	1	607	53	1778	10	1599	11	1570	41823078	41823078	214	1869	unchanged
ENSDARG00000015752	ENSDART00000015038	8	20931313	20952382	1	BC095237.1	2505	1815	RNASEQT00000023104	20931201	20952382	2617	1815	2076	RNASEQG00000023104	13	12	13	12	12	12	0	11	11	0	1091	0	2505	13	1815	12	3041	20951841	20951841	541	541	trim	8	0
ENSDARG00000005651	ENSDART00000015040	7	51095605	51108190	-1	BC095393.1	2629	570	RNASEQT00000007405	51095611	51108573	3006	570	1142	RNASEQG00000007405	6	4	6	4	5	5	0	3	3	0	1629	0	2623	6	570	4	8835	51099907	51099907	1870	1864	trim	209	0
ENSDARG00000015559	ENSDART00000015046	1	47956863	47982459	1	BC092990.1	1470	945	RNASEQT00000008693	47956840	47982465	1499	945	1024	RNASEQG00000008693	11	11	11	11	10	10	0	10	10	0	2485	0	1470	11	945	11	2634	47981990	47981990	469	475	trim	3	0
ENSDARG00000002220	ENSDART00000015076	5	34913576	34916250	-1	BC083464.1	1103	870	0	0	0	0	0	0	0	9	9	0	0	8	8	0	8	8	0	3596	1	0	0	0	0	4818	34913724	0	148	No match
ENSDARG00000035809	ENSDART00000015092	12	3687448	3725201	-1	BC058045.1	5579	4350	RNASEQT00000013280	3687361	3722669	5224	4038	4082	RNASEQG00000013280	51	51	48	47	50	48	0	50	48	0	288891	5233	5063	45	4008	46	577701	3688585	3688585	1137	1142	trim	350	0
ENSDARG00000014927	ENSDART00000015095	20	38749300	38752102	1	BC124468.1	1781	417	RNASEQT00000015545	38749176	38752102	1905	531	593	RNASEQG00000015545	2	1	2	2	1	1	0	0	0	0	84	0	1781	2	417	0	1099	38750790	38750790	1312	1312	trim	192	0
ENSDARG00000040732	ENSDART00000015117	22	41211944	41233405	-1	BC072716.1	1691	1083	RNASEQT00000001669	41211940	41233605	1895	1170	1449	RNASEQG00000001669	8	6	8	7	7	7	0	5	5	0	1571	0	1691	8	1083	5	8110	41212386	41212386	442	446	unchanged
ENSDARG00000002267	ENSDART00000015139	16	47488354	47508893	-1	BC044155.1	1694	1338	RNASEQT00000013091	47488246	47508959	1868	1338	1514	RNASEQG00000013091	11	11	11	11	10	10	0	10	10	0	6985	0	1694	11	1338	11	12680	47488600	47488600	246	354	unchanged
ENSDARG00000012141	ENSDART00000015154	13	26048238	26065910	-1	BC056818.1	3428	2235	RNASEQT00000011340	26048238	26066076	3017	2235	2453	RNASEQG00000011340	23	22	24	22	22	22	0	21	21	0	15801	3	2851	22	2235	22	34008	26049460	26049460	1141	564	trim	24	0
ENSDARG00000004939	ENSDART00000015170	16	44486773	44500302	1	BC134013.1	1622	1500	RNASEQT00000012521	44468402	44504179	4338	1056	1552	RNASEQG00000012521	12	12	14	10	11	11	0	11	11	0	2492	0	1205	10	978	7	3923	44500302	44501393	0	2786	extend	0	1991	0
ENSDARG00000013012	ENSDART00000015199	22	1222047	1227312	1	BC071384.1	387	318	RNASEQT00000000916	1221988	1227319	453	318	412	RNASEQG00000000916	4	3	4	3	3	3	0	2	2	0	81905	3	387	4	318	3	63477	1227278	1227278	34	41	trim	143	0
ENSDARG00000016725	ENSDART00000015224	21	19542915	19544434	1	BC068413.1	1295	468	RNASEQT00000002867	19542550	19544434	1660	633	885	RNASEQG00000002867	3	3	3	3	2	2	0	2	2	0	1940	0	1295	3	468	3	11174	19543659	19543659	775	775	trim	3	0
ENSDARG00000012187	ENSDART00000015230	Zv9_scaffold3548	229917	235080	-1	BC059590.1	735	270	RNASEQT00000019213	229912	235179	839	288	298	RNASEQG00000019213	3	3	3	3	2	2	0	2	2	0	701	0	735	3	137	3	1948	230320	230453	403	541	trim	62	0
ENSDARG00000040433	ENSDART00000015232	3	8814264	8831106	-1	BC046898.1	1766	1512	RNASEQT00000022367	8819581	8819964	306	303	304	RNASEQG00000022367	9	9	2	2	8	1	0	8	1	0	9	0	305	0	303	0	71	8814468	8819583	204	2	unchanged
ENSDARG00000004806	ENSDART00000015262	16	15611768	15622307	1	BC078350.1	1585	1302	RNASEQT00000012227	15611594	15622317	1769	1359	1531	RNASEQG00000012227	7	7	7	7	6	6	0	6	6	0	3892	0	1585	7	1302	7	12728	15622079	15622079	228	238	trim	244	0
ENSDARG00000054378	ENSDART00000015267	9	43139080	43183044	1	BC095089.1	976	726	RNASEQT00000016990	43063153	43200273	3769	1053	1868	RNASEQG00000016990	8	7	18	12	7	7	0	6	6	0	1197	0	747	6	654	6	1557	43182939	43198372	105	1901	unchanged
ENSDARG00000005944	ENSDART00000015309	6	53182750	53205354	1	BC152684.1	2040	1023	RNASEQT00000014680	53177568	53437158	3836	915	1436	RNASEQG00000014680	11	9	11	8	10	7	0	8	6	0	7390	1	700	6	591	4	22414	53201980	53433013	881	2400	trim	596	0
ENSDARG00000002933	ENSDART00000015333	6	15948990	15952085	1	AF422807.1	2093	1029	RNASEQT00000014876	15948888	15952092	2202	1029	1541	RNASEQG00000014876	2	2	2	2	1	1	0	1	1	0	88	0	2093	2	1029	2	1872	15951431	15951431	654	661	unchanged
ENSDARG00000058337	ENSDART00000015368	6	8050545	8062527	1	AY648816.1	2125	1578	RNASEQT00000014263	8050348	8062529	2325	1662	1956	RNASEQG00000014263	16	15	15	15	15	14	0	14	13	0	29543	3	2125	14	1578	13	48811	8061999	8062160	450	369	trim	901	0
ENSDARG00000018966	ENSDART00000015374	11	25719977	25733233	1	AY398332.1	1689	915	RNASEQT00000000238	25719795	25733233	1871	915	1156	RNASEQG00000000238	9	9	9	9	8	8	0	8	8	0	4446	1	1689	9	915	9	8859	25732518	25732518	715	715	trim	1	0
ENSDARG00000005128	ENSDART00000015377	9	30704861	30712480	1	BC049050.1	1042	651	RNASEQT00000016874	30704624	30715101	1674	921	1219	RNASEQG00000016874	11	8	12	11	10	10	0	7	7	0	4669	0	1040	10	651	7	2848	30712420	30712420	60	455	unchanged
ENSDARG00000020746	ENSDART00000015379	2	10558049	10576935	1	BC095882.1	1445	1158	RNASEQT00000004303	10557815	10576898	1642	1158	1524	RNASEQG00000004303	7	6	7	6	6	6	0	5	5	0	69	0	1408	7	1158	6	391	10576780	10576780	155	118	unchanged
ENSDARG00000019342	ENSDART00000015391	24	25967993	25975674	1	BC090405.1	1751	1557	RNASEQT00000020149	25967709	25977260	2490	1557	1856	RNASEQG00000020149	12	12	13	12	11	11	0	11	11	0	1851	0	1751	11	1557	12	3294	25975495	25975495	179	634	unchanged
ENSDARG00000001972	ENSDART00000015395	11	21580359	21594618	-1	BC054637.1	2886	1071	RNASEQT00000000201	21577570	21594779	5836	0	5735	No match	6	5	6	0	5	5	0	4	4	0	111	0	2886	6	0	0	1112	21582139	21577671	1780	101	extend	0	4529	660
ENSDARG00000004297	ENSDART00000015418	17	11190578	11193371	-1	BC060929.1	2794	1986	0	0	0	0	0	0	0	1	1	0	0	0	0	0	0	0	0	0	0	0	0	0	0	18497	11191310	0	732	No match
ENSDARG00000010965	ENSDART00000015479	20	18352041	18359752	-1	BC065608.1	1204	756	RNASEQT00000015328	18352044	18359791	1240	756	893	RNASEQG00000015328	7	7	7	7	6	6	0	6	6	0	12680	0	1201	7	756	7	24489	18352391	18352391	350	347	trim	848	0
ENSDARG00000012572	ENSDART00000015512	22	25507217	25515573	-1	AY648756.1	1446	945	RNASEQT00000001557	25507175	25515660	1575	945	1289	RNASEQG00000001557	9	9	9	9	8	8	0	8	8	0	2857	2	1446	9	945	9	5351	25507461	25507461	244	286	unchanged
ENSDARG00000005220	ENSDART00000015517	24	12531621	12591514	-1	BC053162.1	1249	558	RNASEQT00000019635	12531621	12591557	1292	558	673	RNASEQG00000019635	6	6	6	6	5	5	0	5	5	0	2670	2	1249	6	558	6	6777	12532240	12532240	619	619	trim	386	0
ENSDARG00000014806	ENSDART00000015532	9	39081787	39095198	-1	BC044396.1	2076	720	RNASEQT00000016494	39081787	39095326	2204	735	915	RNASEQG00000016494	7	7	7	7	6	6	0	6	6	0	2958	0	2076	7	720	7	17788	39083076	39083076	1289	1289	trim	1785	0
ENSDARG00000011958	ENSDART00000015535	2	54307209	54402862	1	BC063231.1	2018	1692	RNASEQT00000004120	54307128	54402862	2099	1692	1875	RNASEQG00000004120	16	16	16	16	15	14	1	15	14	1	8949	277	2018	16	1692	16	9376	54402638	54402638	224	224	trim	615	0
ENSDARG00000003701	ENSDART00000015547	1	33277889	33279821	-1	BC115079.1	882	630	RNASEQT00000008568	33277889	33324745	2087	0		No match	2	1	3	0	1	1	0	0	0	0	12060	3	877	1	0	0	93450	33278018		129	2087	trim	547	0
ENSDARG00000016721	ENSDART00000015559	19	7898602	7914269	-1	BC045885.1	2537	1986	RNASEQT00000024924	7898602	7914325	2593	1986	2082	RNASEQG00000024924	15	15	15	15	14	14	0	14	14	0	23991	2	2537	15	1986	15	48173	7899113	7899113	511	511	trim	67	0
ENSDARG00000015971	ENSDART00000015576	21	4418988	4481592	1	BC049305.1	2228	2055	RNASEQT00000002728	4385963	4481592	8351	3243	4026	RNASEQG00000002728	16	15	24	24	15	12	0	14	12	0	1310	0	2227	9	2054	10	4110	4477170	4477267	173	4325	trim	98	0
ENSDARG00000008275	ENSDART00000015628	24	26558510	26585443	-1	BC054921.1	2522	1197	RNASEQT00000019760	26558014	26585803	6275	1803	2355	RNASEQG00000019760	5	4	7	6	4	3	0	3	2	0	200	0	2522	3	1157	2	5935	26559643	26561934	1133	3920	extend	0	3261	1
ENSDARG00000001994	ENSDART00000015629	21	12063746	12121517	1	BC097221.1	1811	1776	RNASEQT00000002812	12063621	12123116	3691	1812	1965	RNASEQG00000002812	19	19	20	19	18	18	0	18	18	0	15495	0	1811	19	1702	18	13834	12121510	12116403	7	1726	trim	128	0
ENSDARG00000006859	ENSDART00000015632	19	44620739	44634205	1	BC056509.1	1739	624	RNASEQT00000025695	44620533	44634317	2057	624	1232	RNASEQG00000025695	8	7	8	7	7	7	0	6	6	0	5240	0	1739	8	624	7	14962	44633492	44633492	713	825	unchanged
ENSDARG00000016318	ENSDART00000015670	14	35150934	35152578	1	BC152676.1	1029	726	RNASEQT00000018723	35150852	35152875	1408	726	941	RNASEQG00000018723	2	1	2	1	1	1	0	0	0	0	186	0	1029	2	726	1	7068	35152408	35152408	170	467	unchanged
ENSDARG00000001859	ENSDART00000015681	25	14768244	14771154	1	AF030285.1	1396	969	RNASEQT00000010874	14768240	14771264	1510	969	1058	RNASEQG00000010874	4	4	4	4	3	3	0	3	3	0	269	0	1396	4	969	4	1088	14770812	14770812	342	452	unchanged
ENSDARG00000015385	ENSDART00000015682	7	39980985	39986691	1	BC093359.1	886	768	RNASEQT00000008024	39980920	39986710	970	768	845	RNASEQG00000008024	7	7	7	7	6	6	0	6	6	0	12928	0	886	7	768	7	11581	39986585	39986585	106	125	unchanged
ENSDARG00000002213	ENSDART00000015688	16	29670788	29730936	1	AF465261.1	3822	3078	RNASEQT00000012931	29670771	29731238	4144	3081	3365	RNASEQG00000012931	18	17	18	17	17	17	0	16	16	0	407	0	3822	17	3078	16	1730	29730459	29730459	477	779	unchanged
ENSDARG00000007257	ENSDART00000015694	16	53051442	53065398	1	BC049057.1	1231	651	RNASEQT00000012606	53051383	53065352	1244	651	797	RNASEQG00000012606	6	5	6	5	5	5	0	4	4	0	5212	8	1185	6	651	5	10048	53064905	53064905	493	447	trim	134	0
ENSDARG00000017665	ENSDART00000015710	25	13930213	13958344	1	BC060922.1	2817	2226	RNASEQT00000010486	13930153	13960215	4748	2226	2640	RNASEQG00000010486	6	5	6	5	5	5	0	4	4	0	963	3	2817	6	2226	5	11779	13958107	13958107	237	2108	trim	701	0
ENSDARG00000021225	ENSDART00000015723	2	37086396	37122354	-1	BC047164.1	3459	1767	RNASEQT00000003982	37086385	37122489	3605	1767	2098	RNASEQG00000003982	18	18	18	18	17	17	0	17	17	0	8589	0	3459	18	1767	18	31545	37087892	37087892	1496	1507	trim	310	0
ENSDARG00000017441	ENSDART00000015732	1	6504171	6512175	-1	BC092705.1	958	456	RNASEQT00000008343	6504165	6513467	2256	456	1817	RNASEQG00000008343	6	6	6	6	5	5	0	5	5	0	287854	54	958	6	456	6	584894	6504604	6504604	433	439	trim	395	0
ENSDARG00000020192	ENSDART00000015765	2	19218055	19234798	1	BC054907.1	2162	1491	RNASEQT00000003782	19217915	19234644	2150	1491	1793	RNASEQG00000003782	11	10	11	10	10	9	1	9	8	1	23265	4311	2008	10	1491	10	79424	19234287	19234287	511	357	trim	327	0
ENSDARG00000007216	ENSDART00000015777	23	43864140	43886356	-1	AY391404.1	2496	1800	RNASEQT00000009866	43864133	43886759	2906	1800	2365	RNASEQG00000009866	18	17	18	17	17	17	0	16	16	0	24937	1	2496	18	1800	17	35789	43864674	43864674	534	541	trim	147	0
ENSDARG00000014161	ENSDART00000015780	12	21055319	21070812	1	BC054895.1	3208	2661	RNASEQT00000013446	21055234	21070812	3293	2661	2951	RNASEQG00000013446	12	11	12	11	11	11	0	10	10	0	2527	1	3208	12	2661	11	11344	21070470	21070470	342	342	trim	12	0
ENSDARG00000017058	ENSDART00000015786	18	43614246	43674113	1	AY662339.1	2712	2253	RNASEQT00000005164	43531703	43677052	6258	2253	3073	RNASEQG00000005164	15	14	16	14	14	14	0	13	13	0	895	0	2588	14	2253	14	2664	43673867	43673867	246	3185	extend	0	2448	0
ENSDARG00000020771	ENSDART00000015827	2	34961720	35194948	1	AY286489.1	4933	4053	RNASEQT00000003957	34961442	35200111	10374	4053	4682	RNASEQG00000003957	24	21	24	21	23	23	0	20	20	0	1510	0	4933	24	4053	21	4799	35194419	35194419	529	5692	extend	0	3486	0
ENSDARG00000005780	ENSDART00000015833	8	53912880	53914105	-1	BC162808.1	1226	1128	RNASEQT00000023925	53912784	53940056	1480	1128	1349	RNASEQG00000023925	1	1	2	1	0	0	0	0	0	0	0	0	1226	0	1128	1	220	53912915	53912915	35	131	unchanged
ENSDARG00000017388	ENSDART00000015841	21	13916249	13923601	1	BC056725.1	1248	729	RNASEQT00000002822	13916024	13923279	1151	729	972	RNASEQG00000002822	5	5	5	5	4	4	0	4	4	0	1961	0	926	5	729	5	4447	13923100	13923100	501	179	trim	399	0
ENSDARG00000007531	ENSDART00000015872	10	44264518	44269530	1	BC049028.1	1100	771	RNASEQT00000024355	44264138	44269530	1480	771	1260	RNASEQG00000024355	6	5	6	5	5	5	0	4	4	0	1480	4	1100	6	771	5	5058	44269310	44269310	220	220	trim	191	0
ENSDARG00000018049	ENSDART00000015873	7	7561474	7605901	1	BC115261.1	2617	2481	RNASEQT00000006996	7561343	7605901	2752	2172	2630	RNASEQG00000006996	22	22	21	18	21	20	0	21	20	0	23152	23	2617	20	2172	17	33829	7605779	7605779	122	122	trim	182	0
ENSDARG00000020979	ENSDART00000015881	6	51664113	51714319	1	BC090162.1	3304	2937	RNASEQT00000015128	51664076	51714346	3368	2994	3102	RNASEQG00000015128	23	22	23	23	22	20	0	21	19	0	8757	2	3304	23	2937	21	17966	51714080	51714080	239	266	unchanged
ENSDARG00000015349	ENSDART00000015884	7	50245205	50262170	-1	BC139634.1	2520	1437	RNASEQT00000008081	50179308	50262955	6272	1437	5669	No match	10	10	16	10	9	9	0	9	9	0	3040	1	2520	9	1437	10	10486	50245883	50179911	678	603	unchanged
ENSDARG00000015254	ENSDART00000015891	8	21401089	21414578	1	BC048038.1	2070	1488	RNASEQT00000023109	21401062	21414729	2248	1488	1740	RNASEQG00000023109	14	13	14	13	13	13	0	12	12	0	6248	0	2070	14	1488	13	12887	21414221	21414221	357	508	trim	1894	0
ENSDARG00000011637	ENSDART00000015932	19	45359678	45381419	1	BC044429.1	2496	1869	0	0	0	0	0	0	0	12	12	0	0	11	11	0	11	11	0	10029	21	0	0	0	0	29151	45380892	0	527	No match
ENSDARG00000018787	ENSDART00000015956	16	25521981	25537433	1	BC059630.1	1767	690	RNASEQT00000012883	25521930	25537475	1860	690	891	RNASEQG00000012883	5	5	5	5	4	4	0	4	4	0	1261	0	1767	5	690	5	9962	25536506	25536506	927	969	unchanged
ENSDARG00000016864	ENSDART00000015979	15	40792148	40811051	-1	BC085625.1	2016	1773	RNASEQT00000017462	40792148	40811113	2078	1773	1843	RNASEQG00000017462	17	17	17	17	16	16	0	16	16	0	6516	0	2016	17	1773	17	7711	40792383	40792383	235	235	trim	655	0
ENSDARG00000020618	ENSDART00000015980	9	33831127	33838261	-1	BC093174.1	1263	768	RNASEQT00000016445	33831127	33838324	1326	789	891	RNASEQG00000016445	7	7	7	7	6	5	1	6	5	1	1761	595	1263	7	768	7	5817	33831562	33831562	435	435	trim	360	0
ENSDARG00000005419	ENSDART00000015991	10	46393914	46401024	-1	BC098597.1	1708	819	RNASEQT00000024809	46393917	46402320	1780	855	949	RNASEQG00000024809	7	6	8	7	6	6	0	5	5	0	119	0	1705	6	819	5	422	46394748	46394748	834	831	unchanged
ENSDARG00000005974	ENSDART00000015996	6	19355554	19365601	-1	BC057535.1	3939	3183	RNASEQT00000014884	19346169	19378530	8143	3192	7154	RNASEQG00000014884	14	14	33	14	13	13	0	13	13	0	916	0	3322	12	3183	14	5009	19356186	19356186	632	989	unchanged
ENSDARG00000015759	ENSDART00000016002	14	43002997	43011849	-1	BC097054.1	1951	756	RNASEQT00000018777	43002610	43012070	2559	756	1126	RNASEQG00000018777	8	7	8	7	7	7	0	6	6	0	11247	0	1951	8	756	7	45009	43004136	43004136	1046	1433	unchanged
ENSDARG00000008829	ENSDART00000016014	20	27049825	27075597	1	BC083265.1	1722	1110	RNASEQT00000015419	27049745	27075602	1807	1110	1352	RNASEQG00000015419	8	8	8	8	7	7	0	7	7	0	825	1	1722	8	1110	8	4719	27075147	27075147	450	455	trim	86	0
ENSDARG00000003963	ENSDART00000016024	15	14535627	14612276	1	BC065969.1	3070	1413	RNASEQT00000017226	14535515	14612276	3182	1413	1776	RNASEQG00000017226	8	8	8	8	7	7	0	7	7	0	1196	0	3070	8	1413	8	7511	14610870	14610870	1406	1406	trim	63	0
ENSDARG00000039241	ENSDART00000016058	6	22912210	23030330	1	BC079480.1	765	606	RNASEQT00000014399	22912070	23078258	5802	2013	2312	RNASEQG00000014399	6	6	17	17	5	5	0	5	5	0	1004	0	765	5	606	5	1418	23030330	23074768	0	3490	trim	30	0
ENSDARG00000017748	ENSDART00000016071	2	14949001	15018496	1	BC059184.1	6015	4014	RNASEQT00000004337	14948848	15016408	4551	4014	4348	RNASEQG00000004337	24	22	23	22	23	22	0	21	21	0	1215	0	4398	22	4014	22	7813	15016205	15016205	1820	203	unchanged
ENSDARG00000014109	ENSDART00000016075	4	16395888	16438594	1	BC075968.1	1479	981	RNASEQT00000021113	16415089	16439344	1902	981	1087	RNASEQG00000021113	11	9	12	9	10	8	0	8	8	0	2903	0	1095	9	981	9	2743	16438529	16438529	65	815	unchanged
ENSDARG00000003584	ENSDART00000016090	20	35486892	35495510	-1	BC066578.1	1962	1335	RNASEQT00000015982	35483370	35495731	2661	1335	1597	RNASEQG00000015982	11	11	12	11	10	10	0	10	10	0	2273	0	1962	10	1335	11	6236	35487478	35487478	586	1064	unchanged
ENSDARG00000011196	ENSDART00000016096	23	30946416	30963341	1	BC046897.1	2745	1692	RNASEQT00000010177	30946369	30963983	3347	1692	1768	RNASEQG00000010177	16	16	17	16	15	15	0	15	15	0	9706	14	2658	15	1692	16	14006	30962317	30962317	1024	1579	unchanged
ENSDARG00000013804	ENSDART00000016112	15	28465241	28471917	1	BC151952.1	1254	642	RNASEQT00000017364	28465145	28471921	1354	642	922	RNASEQG00000017364	11	10	11	10	10	10	0	9	9	0	17685	0	1254	11	642	10	17615	28471489	28471489	428	432	trim	345	0
ENSDARG00000013990	ENSDART00000016117	25	30417485	30453491	-1	BC050506.1	2650	549	RNASEQT00000010623	30417485	30453607	3863	1137	1406	RNASEQG00000010623	6	6	13	13	5	4	0	5	4	0	2064	19	2650	4	507	4	31592	30419433	30419942	1948	2457	trim	209	0
ENSDARG00000039502	ENSDART00000016121	13	27540778	27548635	1	BC060907.1	2117	1389	0	0	0	0	0	0	0	7	7	0	0	6	6	0	6	6	0	2916	1	0	0	0	0	13088	27547953	0	682	No match
ENSDARG00000019810	ENSDART00000016135	19	20278282	20287096	-1	BC069060.1	3677	1896	0	0	0	0	0	0	0	5	4	0	0	4	3	0	3	3	0	1378	4	0	0	0	0	34291	20280643	0	1544	No match
ENSDARG00000013741	ENSDART00000016139	1	6518804	6541068	-1	BC061705.1	2200	1272	0	0	0	0	0	0	0	11	10	0	0	10	10	0	9	9	0	3770	1	0	0	0	0	7728	6519815	0	928	No match
ENSDARG00000018738	ENSDART00000016167	21	22151276	22161544	-1	BC044489.1	2642	2316	RNASEQT00000002901	22151276	22161590	2688	2316	2417	RNASEQG00000002901	16	16	16	16	15	15	0	15	15	0	4112	0	2642	16	2316	16	8600	22151547	22151547	271	271	trim	143	0
ENSDARG00000013087	ENSDART00000016181	11	25998095	26072612	1	BC055138.1	1926	1089	RNASEQT00000000670	25997932	26088562	3941	1128	1410	RNASEQG00000000670	16	15	24	16	15	15	0	14	14	0	14968	1	1926	15	1089	15	22508	26071894	26071894	718	2531	unchanged
ENSDARG00000013295	ENSDART00000016197	19	10307750	10333994	-1	BC076560.1	3737	1626	RNASEQT00000024963	10307746	10335401	4307	1626	2295	RNASEQG00000024963	10	10	11	10	9	9	0	9	9	0	964	0	3737	9	1626	10	7013	10309758	10309758	2008	2012	trim	3	0
ENSDARG00000009771	ENSDART00000016219	21	24658401	24672938	-1	BC071447.1	1711	1134	RNASEQT00000002916	24658397	24672950	1727	1134	1324	RNASEQG00000002916	14	14	14	14	13	12	1	13	12	1	9860	454	1711	14	1134	14	12067	24658800	24658800	399	403	trim	68	0
ENSDARG00000019328	ENSDART00000016230	4	14286233	14485868	-1	BC163713.1	5788	5712	RNASEQT00000020723	14283327	14507245	9417	5712	6459	RNASEQG00000020723	31	31	32	31	30	30	0	30	30	0	2214	0	5788	30	5712	31	5991	14286285	14286285	52	2958	trim	24	0
ENSDARG00000070657	ENSDART00000016248	23	25579288	25588810	1	BC071536.1	1956	1185	RNASEQT00000009694	25579123	25588811	2122	1185	1421	RNASEQG00000009694	13	13	13	13	12	12	0	12	12	0	23598	2	1956	13	1185	13	34808	25588110	25588110	700	701	trim	18	0
ENSDARG00000008485	ENSDART00000016265	7	39670962	39700514	1	BC163507.1	2842	2463	RNASEQT00000008022	39670757	39701089	3622	2475	2977	RNASEQG00000008022	9	8	9	8	8	8	0	7	7	0	274	0	2842	9	2463	8	1749	39700444	39700444	70	645	unchanged
ENSDARG00000017126	ENSDART00000016271	18	43185626	43208540	1	BC068362.1	3179	1866	RNASEQT00000005159	43185521	43208544	3288	1866	2076	RNASEQG00000005159	16	15	16	15	15	15	0	14	14	0	3146	0	3179	16	1866	15	10928	43207332	43207332	1208	1212	trim	1256	0
ENSDARG00000005134	ENSDART00000016283	12	29898569	29911236	-1	BC063978.1	2052	1269	RNASEQT00000013526	29898984	29911280	1681	1269	1332	RNASEQG00000013526	13	12	13	12	12	11	1	11	10	1	5566	132	1637	13	1269	12	10584	29899418	29899418	764	349	trim	1261	0
ENSDARG00000016427	ENSDART00000016294	13	15895825	15897879	1	BC162519.1	2055	1986	RNASEQT00000011757	15887062	15897950	2268	1986	2147	RNASEQG00000011757	1	1	2	1	0	0	0	0	0	0	0	0	2053	0	1986	1	5035	15897829	15897829	50	121	unchanged
ENSDARG00000008219	ENSDART00000016300	6	26011	26795	1	AY738750.1	568	516	RNASEQT00000014188	24769	26795	1595	525	1543	RNASEQG00000014188	2	2	3	3	1	1	0	1	1	0	673	0	568	1	516	1	5490	26743	26743	52	52	trim	544	0
ENSDARG00000001785	ENSDART00000016303	16	565648	570195	-1	AY845127.1	2295	1299	RNASEQT00000012085	565655	570273	2366	1299	1577	RNASEQG00000012085	5	4	5	4	4	4	0	3	3	0	550	1	2288	5	1299	4	2957	566823	566823	796	789	trim	373	0
ENSDARG00000014722	ENSDART00000016307	5	71693876	71699729	-1	BC162281.1	1228	987	RNASEQT00000006248	71692760	71700023	2638	987	1303	RNASEQG00000006248	4	4	4	4	3	3	0	3	3	0	178	0	1228	4	987	4	4737	71694095	71694095	219	1335	extend	0	1232	700
ENSDARG00000017562	ENSDART00000016310	25	31450247	31540218	1	BC095613.1	2419	1527	RNASEQT00000010630	31450171	31540220	2497	1527	1690	RNASEQG00000010630	13	12	13	12	12	12	0	11	11	0	1442	0	2419	13	1527	12	3451	31539413	31539413	805	807	trim	99	0
ENSDARG00000005561	ENSDART00000016314	5	36196468	36218603	1	BC125896.1	2645	2289	RNASEQT00000005947	36025246	36218606	12951	0	5332	No match	20	20	52	0	19	19	0	19	19	0	1690	1	2645	19	0	0	2907	36218395	36180134	208	7619	trim	1053	0
ENSDARG00000003259	ENSDART00000016317	10	6767041	6785376	-1	BC155314.1	1830	1227	RNASEQT00000024041	6767047	6785400	1848	1227	1346	RNASEQG00000024041	8	7	8	7	7	7	0	6	6	0	837	0	1824	8	1227	7	3203	6767549	6767549	508	502	trim	98	0
ENSDARG00000035127	ENSDART00000016321	5	68053898	68088764	-1	U29894.1	1277	1140	RNASEQT00000006886	68053611	68171503	2061	1485	1689	RNASEQG00000006886	9	9	11	11	8	8	0	8	8	0	114	0	1192	8	1107	8	330	68053983	68053983	85	372	unchanged
ENSDARG00000007787	ENSDART00000016351	3	11630452	11652973	-1	BC095853.1	1396	978	RNASEQT00000022402	11630983	11633328	544	543	544	RNASEQG00000022402	8	4	2	2	7	1	0	3	1	0	10	0	544	0	543	0	72	11630511	11630983	59	0	unchanged
ENSDARG00000077620	ENSDART00000016365	9	2878273	2890731	-1	BC092737.1	1633	1185	RNASEQT00000016058	2878273	2890880	1782	1227	1447	RNASEQG00000016058	10	9	10	10	9	9	0	8	8	0	28911	2	1633	10	1185	8	62267	2878608	2878608	335	335	trim	119	0
ENSDARG00000011246	ENSDART00000016368	4	2119921	2126217	-1	BC117593.1	1227	1131	RNASEQT00000020579	2119930	2126277	1278	1197	1201	RNASEQG00000020579	10	10	10	10	9	9	0	9	9	0	3319	0	1218	10	1131	10	4117	2120007	2120007	86	77	trim	1722	0
ENSDARG00000009534	ENSDART00000016369	2	10133498	10178009	-1	BC053246.1	2495	1629	RNASEQT00000003721	10133525	10178170	2539	1629	1883	RNASEQG00000003721	12	12	13	12	11	11	0	11	11	0	12112	156	2378	11	1629	12	41119	10134271	10134271	773	656	trim	258	0
ENSDARG00000009783	ENSDART00000016370	9	38419298	38505433	1	BC081589.1	3043	1401	RNASEQT00000016489	38419023	38505439	3324	1401	1788	RNASEQG00000016489	9	9	9	9	8	8	0	8	8	0	3442	0	3043	9	1401	9	24009	38503903	38503903	1530	1536	trim	314	0
ENSDARG00000005541	ENSDART00000016382	4	11996297	12021240	1	AF122925.1	1871	1137	RNASEQT00000020697	11996222	12021240	1946	1137	1286	RNASEQG00000020697	10	10	10	10	9	9	0	9	9	0	1427	0	1871	10	1137	10	2890	12020580	12020580	660	660	trim	64	0
ENSDARG00000014763	ENSDART00000016407	3	37553274	37566383	-1	BC050487.1	2599	546	RNASEQT00000021999	37553274	37566759	2975	546	992	RNASEQG00000021999	5	4	5	4	4	4	0	3	3	0	29358	36	2599	5	546	4	90093	37555257	37555257	1983	1983	trim	51	0
ENSDARG00000011091	ENSDART00000016418	5	59424412	59461143	-1	AY333792.1	1374	1359	RNASEQT00000006794	59423489	59640891	2615	1359	1688	RNASEQG00000006794	7	7	8	7	6	6	0	6	6	0	83	0	1374	6	1359	7	285	59424416	59424416	4	927	unchanged
ENSDARG00000015164	ENSDART00000016422	8	20976907	20987558	1	BC044375.1	2116	1428	RNASEQT00000023106	20976783	21009953	8749	0	8005	No match	14	13	30	0	13	13	0	12	12	0	9590	1	2116	13	0	0	17128	20987100	21009209	458	744	trim	362	0
ENSDARG00000009862	ENSDART00000016464	10	40647885	40656841	1	AF510720.1	1087	969	RNASEQT00000024761	40647184	40671845	3784	0		No match	6	6	10	0	5	5	0	5	5	0	1446	0	1087	5	0	0	8010	40656734		107	3784	unchanged
ENSDARG00000012672	ENSDART00000016488	1	21625840	21646367	1	BC067173.1	1286	876	RNASEQT00000008479	21625786	21646360	1333	876	1072	RNASEQG00000008479	8	7	8	7	7	7	0	6	6	0	4199	0	1279	8	876	7	7145	21646099	21646099	268	261	trim	64	0
ENSDARG00000015918	ENSDART00000016502	21	22135501	22149939	-1	BC163278.1	2072	1959	RNASEQT00000003404	22134297	22150102	2959	1959	2214	RNASEQG00000003404	14	14	15	14	13	13	0	13	13	0	10759	29	2072	13	1959	14	17650	22135522	22135522	21	745	unchanged
ENSDARG00000006891	ENSDART00000016535	13	32799379	32800988	-1	BC163399.1	1610	1500	RNASEQT00000011412	32798164	32802932	3173	1500	1896	RNASEQG00000011412	1	1	2	1	0	0	0	0	0	0	0	0	1610	0	1500	1	444	32799441	32799441	62	1277	extend	0	1026	2
ENSDARG00000018687	ENSDART00000016562	3	21563578	21595460	-1	AY319286.1	3655	3114	RNASEQT00000022486	21563543	21589713	2829	2214	2253	RNASEQG00000022486	30	30	21	21	29	25	1	29	25	1	896	47	2794	20	2214	20	677	21564119	21564119	541	576	unchanged
ENSDARG00000009351	ENSDART00000016591	25	17302404	17308946	1	DQ317445.1	1611	618	RNASEQT00000010895	17238046	17309391	4343	0	1951	No match	3	3	10	0	2	2	0	2	2	0	195	1	1496	2	0	0	1520	17308364	17296130	582	2392	unchanged
ENSDARG00000017860	ENSDART00000016607	2	6590676	6593942	1	BC092795.1	1029	516	RNASEQT00000003679	6590683	6593942	1022	516	589	RNASEQG00000003679	4	4	4	4	3	3	0	3	3	0	323	0	1022	4	516	4	1756	6593509	6593509	433	433	trim	16	0
ENSDARG00000007285	ENSDART00000016608	17	26450203	26452448	-1	BC059609.1	502	312	RNASEQT00000001933	26450203	26452573	627	0		No match	2	1	2	0	1	1	0	0	0	0	675	0	502	2	0	0	4398	26450325		122	627	trim	1689	0
ENSDARG00000038215	ENSDART00000016612	3	20644491	20779738	-1	BC152667.1	2394	1125	RNASEQT00000021761	20547358	20779800	2640	1125	1652	RNASEQG00000021761	12	9	11	9	11	9	0	8	7	0	4328	0	1302	9	837	7	5583	20645333	20548346	804	988	trim	240	0
ENSDARG00000014230	ENSDART00000016614	17	53052585	53081574	1	BC045500.1	1883	1377	RNASEQT00000002131	53052480	53081577	1857	1305	1461	RNASEQG00000002131	15	15	17	17	14	14	0	14	14	0	16838	24	1749	13	1263	13	27930	53081119	53081181	455	396	trim	243	0
ENSDARG00000035719	ENSDART00000016616	3	15754358	15761876	-1	BC062281.1	1294	540	RNASEQT00000021702	15754358	15762310	1728	540	1187	RNASEQG00000021702	6	6	6	6	5	5	0	5	5	0	5382	3	1294	6	540	6	8859	15754899	15754899	541	541	trim	400	0
ENSDARG00000020279	ENSDART00000016629	6	31721404	31738121	-1	BC071468.1	2333	1812	RNASEQT00000014470	31721616	31738166	2166	1812	1990	RNASEQG00000014470	13	13	13	13	12	12	0	12	12	0	1825	0	2121	13	1812	13	4487	31721792	31721792	388	176	trim	832	0
ENSDARG00000004948	ENSDART00000016635	12	45923376	45930711	-1	BC091454.1	1039	906	RNASEQT00000013628	45923380	45930841	1165	906	1052	RNASEQG00000013628	7	7	7	7	6	6	0	6	6	0	6271	6	1035	7	906	7	12412	45923493	45923493	117	113	trim	577	0
ENSDARG00000015073	ENSDART00000016642	1	6750436	6754481	-1	BC091669.1	1577	825	RNASEQT00000008344	6750435	6754474	1571	825	1094	RNASEQG00000008344	2	2	2	2	1	1	0	1	1	0	106	1	1570	2	825	2	2205	6750912	6750912	476	477	trim	916	0
ENSDARG00000014572	ENSDART00000016658	4	16775196	16793192	-1	BC045345.1	2559	1149	RNASEQT00000020759	16775191	16793242	2614	1149	1353	RNASEQG00000020759	8	8	8	8	7	7	0	7	7	0	2035	2	2559	8	1149	8	14836	16776452	16776452	1256	1261	trim	56	0
ENSDARG00000016964	ENSDART00000016660	7	44043242	44047646	1	BC150228.1	1175	777	RNASEQT00000007359	44043039	44047839	1571	777	1225	RNASEQG00000007359	9	9	9	9	8	8	0	8	8	0	1507	0	1175	9	777	9	2017	44047493	44047493	153	346	trim	17	0
ENSDARG00000015765	ENSDART00000016702	17	35410883	35414493	1	BC095279.1	1036	717	RNASEQT00000002506	35410846	35417861	4441	717	818	RNASEQG00000002506	6	6	6	6	5	5	0	5	5	0	1383	1	1036	6	717	6	2387	35414238	35414238	255	3623	unchanged
ENSDARG00000020822	ENSDART00000016709	5	32341110	32343407	-1	BC092964.1	935	564	0	0	0	0	0	0	0	5	5	0	0	4	4	0	4	4	0	331	0	0	0	0	0	944	32341255	0	145	No match
ENSDARG00000016280	ENSDART00000016727	14	8421488	8427221	-1	BC055173.1	818	519	RNASEQT00000018087	8421488	8427782	1379	519	1154	RNASEQG00000018087	5	4	5	4	4	4	0	3	3	0	2512	0	818	5	519	4	6509	8421713	8421713	225	225	trim	196	0
ENSDARG00000004889	ENSDART00000016728	14	37648802	37657608	-1	BC154306.1	1284	1014	RNASEQT00000018322	37645422	37657730	4786	1014	1180	RNASEQG00000018322	9	9	9	9	8	8	0	8	8	0	2275	0	1284	9	1014	9	3145	37649028	37649028	226	3606	extend	0	2649	451
ENSDARG00000055647	ENSDART00000016758	5	32346149	32354246	-1	BC124299.1	2242	1722	0	0	0	0	0	0	0	7	7	0	0	6	6	0	6	6	0	3155	1	0	0	0	0	15413	32346545	0	396	No match
ENSDARG00000014123	ENSDART00000016780	3	36526653	36544792	-1	BC053244.1	2484	1734	RNASEQT00000021986	36526661	36574315	7802	0	2681	No match	14	14	36	0	13	12	1	13	12	1	92489	12314	2476	13	0	0	90731	36527252	36547438	599	5121	trim	433	0
ENSDARG00000016443	ENSDART00000016791	12	4624745	4642885	-1	BC057465.1	3204	2781	RNASEQT00000013291	4624745	4642979	3349	2832	3071	RNASEQG00000013291	22	21	23	22	21	20	1	20	19	1	43819	3810	3204	22	2781	21	88533	4625023	4625023	278	278	trim	12	0
ENSDARG00000021086	ENSDART00000016800	8	1279137	1288484	-1	BC093231.1	1399	951	RNASEQT00000023460	1270089	1288964	2611	951	1585	RNASEQG00000023460	6	5	6	5	5	4	0	4	4	0	571	0	1358	4	951	5	4838	1281759	1281759	294	1026	unchanged
ENSDARG00000010021	ENSDART00000016803	7	41136971	41144255	-1	BC108002.1	1566	654	RNASEQT00000007340	41136971	41144322	1633	654	745	RNASEQG00000007340	4	4	4	4	3	3	0	3	3	0	2410	1	1566	4	654	4	11468	41137859	41137859	888	888	trim	217	0
ENSDARG00000015734	ENSDART00000016834	16	14411898	14417071	1	AY528720.1	867	633	0	0	0	0	0	0	0	5	5	0	0	4	0	0	4	0	0	0	0	0	0	0	0	10	14416881	0	190	No match
ENSDARG00000032430	ENSDART00000016860	15	20706367	20734480	1	BC097118.1	2881	1770	RNASEQT00000017289	20706276	20734479	2971	1770	1884	RNASEQG00000017289	15	15	15	15	14	14	0	14	14	0	15178	2	2880	15	1770	15	50558	20733392	20733392	1088	1087	trim	1290	0
ENSDARG00000020232	ENSDART00000016890	6	52290373	52299461	-1	BC071374.1	1129	738	RNASEQT00000014669	52290372	52299547	1216	738	918	RNASEQG00000014669	7	6	7	6	6	6	0	5	5	0	4905	1	1129	7	738	6	11297	52290670	52290670	297	298	trim	1415	0
ENSDARG00000017781	ENSDART00000016891	23	18542766	18552078	-1	BC083219.1	1253	783	RNASEQT00000009610	18542832	18552377	1486	783	1157	RNASEQG00000009610	6	6	6	6	5	5	0	5	5	0	5224	0	1187	6	783	6	14777	18543161	18543161	395	329	trim	1053	0
ENSDARG00000013787	ENSDART00000016936	1	24641201	24650104	1	BC093232.1	1932	1443	RNASEQT00000008503	24641176	24656449	2792	2040	2264	RNASEQG00000008503	6	6	8	8	5	4	0	5	4	0	130	0	1781	4	1443	4	1062	24649814	24655921	290	528	trim	5	0
ENSDARG00000008816	ENSDART00000016946	13	22819303	22839236	-1	BC066370.1	2475	1635	RNASEQT00000011293	22819303	22839605	2764	1635	2036	RNASEQG00000011293	13	13	14	13	12	11	1	12	11	1	11331	480	2395	12	1635	13	25557	22820031	22820031	728	728	trim	335	0
ENSDARG00000020656	ENSDART00000016960	13	41427073	41567652	1	BC054581.1	3087	2004	RNASEQT00000011498	41427062	41571531	6977	2004	2376	RNASEQG00000011498	19	18	19	18	18	18	0	17	17	0	823	0	3087	19	2004	18	2066	41566930	41566930	722	4601	extend	0	3711	0
ENSDARG00000012777	ENSDART00000016976	23	18289260	18300744	-1	BC146720.1	2130	903	RNASEQT00000009609	18289256	18301127	2517	903	1398	RNASEQG00000009609	8	8	8	8	7	7	0	7	7	0	9613	25	2130	8	903	8	47710	18290375	18290375	1115	1119	trim	7	0
ENSDARG00000010981	ENSDART00000017017	16	41863386	41899969	1	BC076087.1	1834	951	RNASEQT00000012498	41863005	41899973	2219	951	1479	RNASEQG00000012498	7	6	7	6	6	6	0	5	5	0	1218	0	1834	7	951	6	5237	41899233	41899233	736	740	trim	135	0
ENSDARG00000021439	ENSDART00000017052	13	3569853	3591139	-1	BC047166.1	2854	1731	RNASEQT00000011148	3569849	3591203	2922	1731	1923	RNASEQG00000011148	10	9	10	9	9	9	0	8	8	0	10418	3	2854	10	1731	9	55723	3570848	3570848	995	999	trim	140	0
ENSDARG00000011777	ENSDART00000017053	18	49869734	49876923	1	BC055600.1	1496	621	RNASEQT00000005623	49868398	49876925	3219	1605	2373	RNASEQG00000005623	9	7	16	16	8	5	1	6	4	1	3177	413	1496	4	621	4	24350	49876079	49876079	814	846	unchanged
ENSDARG00000011408	ENSDART00000017110	13	52339436	52362099	-1	BC047185.1	3414	1347	RNASEQT00000012055	52339311	52362144	3584	1347	1564	RNASEQG00000012055	10	10	10	10	9	9	0	9	9	0	5899	1	3414	10	1347	10	59951	52341331	52341331	1895	2020	unchanged
ENSDARG00000037091	ENSDART00000017122	14	31142524	31147596	1	BC083231.1	1562	1173	RNASEQT00000018240	31142342	31153526	4359	1173	1387	RNASEQG00000018240	14	14	20	14	13	13	0	13	13	0	2508	0	1562	13	1173	14	5165	31147239	31147239	357	2972	trim	33	0
ENSDARG00000030448	ENSDART00000017126	2	37201510	37222820	1	AY926457.1	1820	1695	RNASEQT00000004530	37201449	37224560	3622	1668	1788	RNASEQG00000004530	16	16	15	15	15	14	0	15	14	0	2829	1	1820	14	1668	14	4618	37222726	37222726	94	1834	unchanged
ENSDARG00000008414	ENSDART00000017138	5	38353106	38363535	1	BC090725.1	2021	1062	RNASEQT00000005970	38343685	38364728	5091	2799	2940	RNASEQG00000005970	7	7	13	12	6	6	0	6	6	0	152	0	2020	6	1062	6	756	38362577	38362577	958	2151	extend	0	1685	77
ENSDARG00000024785	ENSDART00000017139	1	42607580	42857497	1	BC153431.1	1326	1056	RNASEQT00000009191	42607521	43043513	2237	1122	1451	RNASEQG00000009191	7	6	8	7	6	6	0	5	5	0	600	0	1326	6	1056	5	1482	42857497	43042727	0	786	unchanged
ENSDARG00000020895	ENSDART00000017144	2	30618943	30623127	1	BC142844.1	1251	621	RNASEQT00000003913	30618847	30623132	1352	621	731	RNASEQG00000003913	7	7	7	7	6	6	0	6	6	0	2141	0	1251	7	621	7	4093	30622511	30622511	616	621	trim	133	0
ENSDARG00000013095	ENSDART00000017148	13	2137612	2172612	1	BC068331.1	3018	1896	RNASEQT00000011141	2137423	2172612	3207	1896	2383	RNASEQG00000011141	16	16	16	16	15	15	0	15	15	0	8655	4	3018	16	1896	16	22372	2171788	2171788	824	824	trim	329	0
ENSDARG00000013795	ENSDART00000017153	8	41720577	41745001	1	BC052117.1	2356	1944	RNASEQT00000023817	41720489	41745335	2778	1944	2258	RNASEQG00000023817	13	12	13	12	12	12	0	11	11	0	941	1	2356	13	1944	12	2894	41744815	41744815	186	520	unchanged
ENSDARG00000010423	ENSDART00000017155	7	40045586	40050510	-1	BC095288.1	1360	825	RNASEQT00000007319	40045590	40051609	1470	825	959	RNASEQG00000007319	9	9	10	9	8	8	0	8	8	0	3221	0	1348	8	825	9	4757	40046101	40046101	515	511	trim	52	0
ENSDARG00000017929	ENSDART00000017165	24	14144350	14346088	1	BC163724.1	4892	4518	RNASEQT00000019647	14143195	14349067	9026	4518	5845	RNASEQG00000019647	22	20	22	20	21	21	0	19	19	0	4106	0	4892	22	4518	20	12490	14345886	14345886	202	3181	trim	17	0
ENSDARG00000012261	ENSDART00000017172	3	16009001	16033616	-1	BC154433.1	3355	2922	RNASEQT00000021708	16009001	16033638	3377	2922	3085	RNASEQG00000021708	28	27	28	27	27	27	0	26	26	0	38928	3	3355	28	2922	27	17799	16009293	16009293	292	292	trim	561	0
ENSDARG00000009922	ENSDART00000017173	2	9974232	9981356	-1	AY071922.1	2698	1167	RNASEQT00000003718	9974234	9981566	2891	1152	1527	RNASEQG00000003718	5	4	5	4	4	3	1	3	2	1	152	2	2681	4	1152	3	3267	9975598	9975598	1366	1364	trim	39	0
ENSDARG00000010097	ENSDART00000017179	14	33300933	33308062	1	AF515270.1	1627	1509	RNASEQT00000018701	33303240	33308070	1249	924	1141	RNASEQG00000018701	10	10	4	3	9	3	0	9	3	0	7	0	1238	3	924	2	229	33307962	33307962	100	108	unchanged
ENSDARG00000019396	ENSDART00000017180	4	11446738	11453033	-1	BC076311.1	1370	618	RNASEQT00000020687	11446255	11453069	1889	618	800	RNASEQG00000020687	5	5	5	5	4	4	0	4	4	0	271	0	1370	5	618	5	1072	11447344	11447344	606	1089	extend	0	532	1
ENSDARG00000002710	ENSDART00000017188	22	39555946	39572942	-1	BC124135.1	2779	2118	RNASEQT00000001213	39556017	39573026	2789	2115	2283	RNASEQG00000001213	17	17	17	17	16	15	0	16	15	0	82523	2399	2705	16	2115	16	225600	39556523	39556523	577	506	trim	531	0
ENSDARG00000014626	ENSDART00000017191	12	6074368	6077859	-1	BC078386.1	1562	810	RNASEQT00000013776	6074357	6077925	1639	810	1016	RNASEQG00000013776	3	3	3	3	2	2	0	2	2	0	677	0	1562	3	810	3	6736	6074980	6074980	612	623	unchanged
ENSDARG00000056181	ENSDART00000017229	21	22615988	22756471	-1	AY029402.1	2575	2505	RNASEQT00000002903	22611851	22756539	7204	2667	2997	RNASEQG00000002903	18	18	18	17	17	16	0	17	16	0	2947	0	2575	16	2244	15	6605	22616058	22616058	70	4207	extend	0	2694	5
ENSDARG00000034466	ENSDART00000017279	1	57994651	57997793	-1	BC154669.1	2289	1176	0	0	0	0	0	0	0	9	9	0	0	8	0	0	8	0	0	0	0	0	0	0	0	42	57995759	0	1108	No match
ENSDARG00000013004	ENSDART00000017299	25	19454892	19468010	1	BC095340.1	2701	1326	RNASEQT00000010533	19454731	19468005	2857	1326	1557	RNASEQG00000010533	11	10	11	10	10	10	0	9	9	0	1888	2	2696	11	1326	10	11924	19466705	19466705	1305	1300	trim	288	0
ENSDARG00000020217	ENSDART00000017304	3	40284201	40290037	1	BC045289.1	1873	816	RNASEQT00000022026	40274597	40290036	9417	816	8657	RNASEQG00000022026	8	8	11	8	7	7	0	7	7	0	7779	0	1872	7	816	8	7956	40289276	40289276	761	760	trim	748	0
ENSDARG00000013279	ENSDART00000017305	22	696345	712515	1	BC124408.1	1734	1551	RNASEQT00000001266	700583	712579	1843	1587	1628	RNASEQG00000001266	13	12	12	12	12	11	0	11	11	0	1078	0	1714	11	1551	12	2271	712364	712364	151	215	unchanged
ENSDARG00000018980	ENSDART00000017307	16	6853466	6861181	1	BC074088.1	2045	1359	RNASEQT00000012134	6848960	6861181	2114	1359	1697	RNASEQG00000012134	4	3	5	3	3	3	0	2	2	0	324	0	2045	3	1359	3	3913	6860764	6860764	417	417	trim	611	0
ENSDARG00000030700	ENSDART00000017330	19	15448138	15459126	1	BC058048.1	2151	1776	RNASEQT00000025012	15448018	15460371	3516	1788	2032	RNASEQG00000025012	19	17	19	17	18	18	0	16	16	0	14725	2	2151	19	1776	17	13466	15458809	15458809	239	1484	trim	2444	0
ENSDARG00000011564	ENSDART00000017359	19	40986383	41000247	1	AY648751.1	2423	1917	RNASEQT00000025224	40986270	41000247	2536	1917	2151	RNASEQG00000025224	10	10	10	10	9	9	0	9	9	0	27691	3	2423	10	1917	10	70141	40999862	40999862	385	385	trim	4944	0
ENSDARG00000032802	ENSDART00000017376	17	43973100	44048587	1	BC044389.1	4427	3570	RNASEQT00000002065	43972912	44048807	4749	3702	4011	RNASEQG00000002065	37	34	35	34	36	32	1	33	29	1	30312	1012	4340	34	3483	30	40436	44043191	44048069	736	738	trim	164	0
ENSDARG00000021047	ENSDART00000017391	3	42801601	42835553	-1	BC048884.1	3997	2952	RNASEQT00000022051	42801601	42835670	4114	2952	3205	RNASEQG00000022051	23	22	23	22	22	22	0	21	21	0	35437	9	3997	23	2952	22	37251	42802510	42802510	909	909	trim	454	0
ENSDARG00000019613	ENSDART00000017402	6	40020608	40029385	-1	BC076496.1	2286	1293	RNASEQT00000014543	40020608	40093616	2466	1293	1642	RNASEQG00000014543	5	5	7	5	4	4	0	4	4	0	2761	5	2241	4	1293	5	22255	40021432	40021432	824	824	trim	62	0
ENSDARG00000002406	ENSDART00000017413	1	21465390	21477477	1	BC054130.1	1494	1347	RNASEQT00000009053	21465343	21478459	2523	1347	1442	RNASEQG00000009053	12	12	12	12	11	11	0	11	11	0	80	0	1494	12	1347	12	279	21477378	21477378	99	1081	unchanged
ENSDARG00000011247	ENSDART00000017427	24	29857761	29889546	1	BC114288.1	1691	1518	RNASEQT00000019792	29857550	29889511	2083	1518	1748	RNASEQG00000019792	16	14	16	14	15	15	0	13	13	0	3123	3	1656	15	1518	14	3174	29885995	29885995	154	335	trim	836	0
ENSDARG00000021369	ENSDART00000017440	8	29502331	29503380	-1	BC162747.1	1050	984	0	0	0	0	0	0	0	1	1	0	0	0	0	0	0	0	0	0	0	0	0	0	0	56	29502376	0	45	No match
ENSDARG00000002445	ENSDART00000017445	16	8650400	8662772	-1	BC080259.1	3676	2331	RNASEQT00000012152	8650401	8662883	3786	2331	2555	RNASEQG00000012152	7	7	7	7	6	6	0	6	6	0	373	1	3675	7	2331	7	4138	8651632	8651632	1232	1231	trim	72	0
ENSDARG00000009753	ENSDART00000017485	20	35457800	35462544	1	BC071385.1	764	378	RNASEQT00000015512	35457658	35462545	907	378	667	RNASEQG00000015512	4	4	4	4	3	3	0	3	3	0	4858	1	764	4	378	4	13035	35462305	35462305	239	240	trim	194	0
ENSDARG00000019835	ENSDART00000017493	17	38429961	38432135	1	AF321112.1	1765	1041	RNASEQT00000002523	38429928	38432704	2367	1041	1201	RNASEQG00000002523	2	2	2	2	1	1	0	1	1	0	36	0	1765	2	1041	2	708	38431538	38431538	597	1166	unchanged
ENSDARG00000007377	ENSDART00000017510	17	52270914	52283859	1	BC097034.1	2210	1386	RNASEQT00000002124	52270079	52283859	2277	1386	1828	RNASEQG00000002124	10	9	11	9	9	9	0	8	8	0	23940	1	2002	9	1386	9	55505	52283410	52283410	449	449	trim	1448	0
ENSDARG00000011076	ENSDART00000017535	19	5614748	5623144	1	BC072722.1	1460	705	RNASEQT00000024893	5614491	5623144	1600	705	931	RNASEQG00000024893	6	5	7	5	5	5	0	4	4	0	458	0	1460	5	705	5	1739	5622475	5622475	669	669	extend	0	507	0
ENSDARG00000009106	ENSDART00000017553	20	40489360	40504130	1	BC045456.1	2221	1437	RNASEQT00000015564	40489285	40504139	2305	1380	1512	RNASEQG00000015564	10	10	10	10	9	9	0	9	9	0	16955	1	2221	10	1380	10	62087	40503346	40503346	784	793	trim	286	0
ENSDARG00000015425	ENSDART00000017560	17	38951896	39054897	-1	BC093185.1	2163	1710	RNASEQT00000002526	38950002	38979753	3151	1050	1076	RNASEQG00000002526	17	17	9	9	16	14	0	16	14	0	1311	0	1256	8	1050	8	2650	38952077	38952077	181	2075	unchanged
ENSDARG00000003576	ENSDART00000017562	16	34552490	34590499	1	BC133175.1	3089	1863	RNASEQT00000012448	34552434	34590498	3144	1863	2380	RNASEQG00000012448	12	10	12	10	11	11	0	9	9	0	380	0	3088	12	1863	10	1841	34589734	34589734	765	764	trim	43	0
ENSDARG00000013598	ENSDART00000017569	15	33995840	33998914	1	BC116495.1	1241	729	RNASEQT00000017872	33995672	33999456	1951	804	947	RNASEQG00000017872	4	4	4	4	3	3	0	3	3	0	71	0	1241	4	729	4	587	33998452	33998452	462	1004	unchanged
ENSDARG00000011764	ENSDART00000017572	4	19421744	19435347	1	BC045349.1	2615	2115	RNASEQT00000021165	19421113	19437110	3611	2115	3020	RNASEQG00000021165	17	16	18	16	16	16	0	15	15	0	4811	1	2615	16	2115	16	8943	19435121	19435121	226	591	unchanged
ENSDARG00000041735	ENSDART00000017593	9	13998680	14005158	1	BC142898.1	700	546	0	0	0	0	0	0	0	5	5	0	0	4	4	0	4	4	0	344	0	0	0	0	0	943	14005004	0	154	No match
ENSDARG00000011579	ENSDART00000017594	3	23960067	23963100	1	BC155298.1	1854	840	RNASEQT00000021791	23959694	23963098	2225	840	1509	RNASEQG00000021791	2	2	2	2	1	1	0	1	1	0	55	0	1852	2	840	2	1494	23962382	23962382	718	716	trim	506	0
ENSDARG00000010873	ENSDART00000017596	6	23789283	23802896	1	BC154493.1	1842	1551	RNASEQT00000014934	23789160	23827702	6488	2016	2430	RNASEQG00000014934	13	13	14	13	12	12	0	12	12	0	9345	1	1842	12	1551	13	16368	23802896	23803361	0	4058	unchanged
ENSDARG00000020544	ENSDART00000017599	11	25247744	25264872	1	BC045943.1	1884	897	RNASEQT00000000229	25247310	25264872	2318	897	1451	RNASEQG00000000229	5	4	5	4	4	4	0	3	3	0	523	0	1884	5	897	4	2736	25264005	25264005	867	867	trim	19	0
ENSDARG00000020158	ENSDART00000017605	24	17818977	17825870	1	BC074072.1	1725	1524	RNASEQT00000020061	17818896	17826317	2253	1524	1719	RNASEQG00000020062	11	11	11	11	10	10	0	10	10	0	330	0	1725	11	1524	11	656	17825783	17825783	87	534	unchanged
ENSDARG00000042336	ENSDART00000017619	18	8277203	8307418	1	BC074090.1	2637	1635	RNASEQT00000004901	8269355	8307420	3334	1875	2534	RNASEQG00000004901	16	15	16	16	15	15	0	14	14	0	2508	1	2434	15	1635	14	5160	8306620	8306620	798	800	trim	427	0
ENSDARG00000052910	ENSDART00000017635	14	35620854	35625303	1	BC055535.1	1675	1080	RNASEQT00000018724	35616928	35628141	6097	1164	4125	RNASEQG00000018724	7	6	14	7	6	6	0	5	5	0	529	1	1675	5	1080	5	3925	35624871	35624871	432	1972	unchanged
ENSDARG00000020847	ENSDART00000017646	3	16542258	16593103	1	BC066692.1	3502	2505	RNASEQT00000021716	16542091	16593109	3675	2505	2746	RNASEQG00000021716	21	20	21	20	20	20	0	19	19	0	23106	6	3502	21	2505	20	24018	16592180	16592180	923	929	trim	117	0
ENSDARG00000019362	ENSDART00000017668	2	26436528	26448680	1	BC095372.1	3689	1725	RNASEQT00000003864	26436488	26448683	3732	1725	1783	RNASEQG00000003864	16	16	16	16	15	15	0	15	15	0	9123	2	3689	16	1725	16	62400	26446734	26446734	1946	1949	trim	1221	0
ENSDARG00000056797	ENSDART00000017679	1	13168437	13191583	1	BC109406.1	2428	1359	RNASEQT00000008405	13168440	13194741	5846	1359	2009	RNASEQG00000008405	11	9	9	9	10	10	0	8	8	0	700	0	2425	8	1359	9	3143	13190904	13190904	679	3837	extend	0	2466	51
ENSDARG00000003051	ENSDART00000017686	24	31452305	31462981	1	AY394970.1	1922	810	RNASEQT00000020213	31452165	31464410	843	621	843	RNASEQG00000020213	7	6	8	7	6	6	0	5	5	0	5190	1	700	6	618	5	15695	31461951	31464410	1030	0	unchanged
ENSDARG00000021032	ENSDART00000017695	6	31784532	31786000	-1	BC095603.1	1469	1116	0	0	0	0	0	0	0	1	1	0	0	0	0	0	0	0	0	0	0	0	0	0	0	5942	31784654	0	122	No match
ENSDARG00000014966	ENSDART00000017709	21	39333985	39357572	1	BC054711.1	2062	1521	RNASEQT00000003080	39333632	39357730	2573	1521	2164	RNASEQG00000003080	8	8	8	8	7	7	0	7	7	0	2138	2	2062	8	1521	8	9161	39357321	39357321	251	409	trim	436	0
ENSDARG00000013375	ENSDART00000017718	8	448287	462096	1	BC056774.1	2685	1857	RNASEQT00000022908	451911	462096	2715	1857	2166	RNASEQG00000022908	5	4	2	2	4	2	0	3	1	0	278	24	2372	1	1823	1	11403	461547	461547	549	549	trim	80	0
ENSDARG00000015343	ENSDART00000017728	23	29624335	29637377	-1	BC044196.1	1892	1536	RNASEQT00000010169	29623894	29637450	2406	1536	1628	RNASEQG00000010169	12	12	12	12	11	11	0	11	11	0	6836	7	1892	12	1536	12	15038	29624672	29624672	337	778	unchanged
ENSDARG00000026218	ENSDART00000017743	5	8132075	8249687	1	BC049340.1	2050	1614	RNASEQT00000006377	8131965	8236956	1551	1296	1516	RNASEQG00000006377	10	9	8	7	9	9	0	8	8	0	744	0	677	5	567	4	3747	8249361	8236921	326	35	unchanged
ENSDARG00000011519	ENSDART00000017750	3	22436316	22441663	-1	BC097214.1	1184	564	RNASEQT00000022492	22436525	22455929	1610	564	1228	RNASEQG00000022492	7	6	8	6	6	6	0	5	5	0	5922	3	975	6	564	6	3401	22437030	22437030	591	382	unchanged
ENSDARG00000003087	ENSDART00000017755	22	22623596	22637779	1	BC055680.1	2038	1314	RNASEQT00000001129	22623607	22637771	2019	1314	1490	RNASEQG00000001129	11	11	11	11	10	10	0	10	10	0	1565	0	2019	11	1314	11	4212	22637242	22637242	537	529	trim	432	0
ENSDARG00000003902	ENSDART00000017756	17	27315894	27320142	1	BC075887.1	1256	1005	RNASEQT00000002444	27315787	27320153	1374	1005	1141	RNASEQG00000002444	9	7	9	7	8	8	0	6	6	0	3210	0	1256	9	1005	7	7362	27319758	27319758	222	233	unchanged
ENSDARG00000016368	ENSDART00000017770	13	45476693	45508546	1	BC093322.1	1116	489	RNASEQT00000011528	45480256	45508546	1143	471	539	RNASEQG00000011528	7	7	5	5	6	4	0	6	4	0	1252	2	986	4	382	4	3865	45507942	45507942	604	604	extend	0	58	0
ENSDARG00000003213	ENSDART00000017785	14	49053883	49090125	1	BC057466.1	3532	2604	RNASEQT00000018382	49053577	49090119	3650	2604	2929	RNASEQG00000018382	20	20	21	20	19	17	2	19	17	2	15238	2171	3526	19	2604	20	48552	49089398	49089398	727	721	trim	323	0
ENSDARG00000020872	ENSDART00000017805	25	38121799	38148659	-1	BC058868.1	5383	4251	RNASEQT00000011092	38121661	38148772	5634	4251	4551	RNASEQG00000011092	13	13	13	13	12	11	1	12	11	1	425	49	5383	13	4251	13	6787	38122744	38122744	945	1083	unchanged
ENSDARG00000020467	ENSDART00000017838	22	15841912	15850864	-1	BC044153.1	3014	2568	RNASEQT00000001059	15841913	15850940	2996	2667	2682	RNASEQG00000001059	21	21	22	22	20	20	0	20	20	0	30924	9	2920	20	2568	20	43475	15842227	15842227	315	314	trim	17	0
ENSDARG00000020986	ENSDART00000017850	8	3604140	3610677	-1	BC154793.1	1535	1032	RNASEQT00000023488	3603966	3610828	1860	1032	1415	RNASEQG00000023488	3	2	3	2	2	2	0	1	1	0	420	0	1535	3	1032	2	11449	3604411	3604411	271	445	unchanged
ENSDARG00000009436	ENSDART00000017852	2	16636583	16663153	-1	BC074046.1	2139	1518	RNASEQT00000003767	16636583	16663298	2284	1518	1681	RNASEQG00000003767	11	11	11	11	10	10	0	10	10	0	2049	5	2139	11	1518	11	7431	16637186	16637186	603	603	trim	318	0
ENSDARG00000006477	ENSDART00000017859	6	40485495	40494338	1	BC055129.1	3968	1230	RNASEQT00000014552	40485304	40494370	4188	1644	3085	RNASEQG00000014552	10	9	10	3	9	9	0	8	8	0	3880	0	3965	9	68	0	41699	40491438	40493267	2647	1103	trim	256	0
ENSDARG00000008788	ENSDART00000017902	23	39704032	39740246	1	BC060911.1	2013	1302	RNASEQT00000010254	39703908	39740512	2403	1302	1502	RNASEQG00000010254	13	11	13	11	12	12	0	10	10	0	2989	0	2013	13	1302	11	5841	39739304	39739304	635	901	unchanged
ENSDARG00000002880	ENSDART00000017917	19	41340111	41470223	1	BC107837.1	1155	1050	RNASEQT00000025232	41340093	41648428	5411	2898	3021	RNASEQG00000025232	13	13	28	28	12	12	0	12	12	0	811	0	1155	12	1050	12	763	41470223	41646038	0	2390	extend	0	1517	0
ENSDARG00000008212	ENSDART00000017930	17	16177527	16183629	-1	BC153996.1	1981	1230	0	0	0	0	0	0	0	2	2	0	0	1	0	0	1	0	0	0	0	0	0	0	0	145	16178082	0	555	No match
ENSDARG00000020730	ENSDART00000017937	21	17722272	17740898	1	BC057525.1	3386	2376	RNASEQT00000003338	17722231	17749120	8698	2376	2543	RNASEQG00000003338	20	18	25	18	19	18	0	17	17	0	6576	0	3198	18	2376	18	16507	17739962	17739962	884	6155	unchanged
ENSDARG00000031761	ENSDART00000017956	5	33961391	33976356	-1	BC065585.1	2318	1770	0	0	0	0	0	0	0	14	12	0	0	13	13	0	11	11	0	9838	2	0	0	0	0	24050	33963456	0	368	No match
ENSDARG00000018002	ENSDART00000017962	3	27921261	27928779	1	BC153644.1	1088	957	RNASEQT00000022559	27920893	27929052	1729	1011	1325	RNASEQG00000022559	7	7	7	7	6	6	0	6	6	0	9630	0	1088	7	957	7	8224	27928648	27928648	131	404	unchanged
ENSDARG00000008014	ENSDART00000017966	16	45838881	45849546	-1	BC097186.1	1466	903	RNASEQT00000012541	45838882	45844411	954	393	503	RNASEQG00000012541	9	8	4	3	8	6	0	7	5	0	1487	1	952	3	393	2	4003	45839333	45839333	452	451	trim	72	0
ENSDARG00000012627	ENSDART00000017970	2	49569957	49594175	-1	BC076537.1	2437	720	RNASEQT00000004082	49569957	49594330	2592	720	1340	RNASEQG00000004082	5	5	5	5	4	4	0	4	4	0	4111	3	2437	5	720	5	42926	49571209	49571209	1252	1252	trim	39	0
ENSDARG00000011613	ENSDART00000017973	11	25272944	25278977	1	BC044487.1	2363	1572	RNASEQT00000000230	25272761	25278977	2454	1572	1928	RNASEQG00000000230	16	15	17	15	15	15	0	14	14	0	18424	17	2271	15	1572	15	35910	25278451	25278451	526	526	trim	404	0
ENSDARG00000020948	ENSDART00000018017	10	6689334	6717917	-1	BC066504.1	2780	1512	RNASEQT00000024474	6689334	6717988	2851	1512	1778	RNASEQG00000024474	15	14	15	14	14	14	0	13	13	0	3580	0	2780	15	1512	14	10357	6690407	6690407	1073	1073	unchanged
ENSDARG00000035178	ENSDART00000018025	5	56920837	56938194	-1	BC077106.1	1937	1065	RNASEQT00000006110	56920589	56938352	2343	1113	1265	RNASEQG00000006110	7	7	7	7	6	6	0	6	6	0	1566	1	1937	7	1065	7	4173	56921667	56921667	830	1078	trim	39	0
ENSDARG00000010602	ENSDART00000018047	5	12495962	12502421	1	BC095738.1	1139	669	0	0	0	0	0	0	0	4	4	0	0	3	3	0	3	3	0	31	0	0	0	0	0	293	12501982	0	439	No match
ENSDARG00000006868	ENSDART00000018054	8	56091251	56094016	-1	BC095193.1	1768	600	RNASEQT00000023413	56091251	56094004	1756	600	665	RNASEQG00000023413	3	2	3	2	2	2	0	1	1	0	63	0	1756	3	600	2	1098	56092342	56092342	1091	1091	confirmed
ENSDARG00000019772	ENSDART00000018062	15	477414	495443	1	BC139709.1	2617	2508	RNASEQT00000017536	481602	495494	2138	1461	1979	RNASEQG00000017536	19	19	16	13	18	16	0	18	16	0	108	0	2087	15	1461	12	425	495335	495335	108	159	unchanged
ENSDARG00000045294	ENSDART00000018095	24	29305847	29320410	1	BC092831.1	2001	1083	RNASEQT00000019786	29305579	29320617	2476	1083	1525	RNASEQG00000019786	9	9	9	9	8	8	0	8	8	0	3295	5	2001	9	1083	9	11743	29319666	29319666	744	951	trim	245	0
ENSDARG00000019250	ENSDART00000018107	25	36355975	36357467	-1	BC139581.1	1493	996	0	0	0	0	0	0	0	1	1	0	0	0	0	0	0	0	0	0	0	0	0	0	0	3055	36356408	0	433	No match
ENSDARG00000016163	ENSDART00000018114	2	8501545	8561835	1	BC066557.1	3856	2694	RNASEQT00000003697	8501456	8561835	3945	2694	2975	RNASEQG00000003697	24	23	24	23	23	23	0	22	22	0	5750	0	3856	24	2694	23	14490	8560865	8560865	970	970	trim	79	0
ENSDARG00000011239	ENSDART00000018117	5	38330890	38339672	1	BC092987.1	937	459	RNASEQT00000005969	38330542	38339672	1285	459	847	RNASEQG00000005969	4	4	4	4	3	3	0	3	3	0	1715	1	937	4	459	4	7501	38339234	38339234	438	438	trim	77	0
ENSDARG00000029358	ENSDART00000018119	25	17762688	17776313	1	BC056832.1	3111	1182	RNASEQT00000010516	17762248	17776313	5654	552	3814	RNASEQG00000010516	10	10	10	5	9	8	0	9	8	0	2744	10	3111	8	552	4	16376	17774473	17774473	1840	1840	trim	2091	0
ENSDARG00000012199	ENSDART00000018123	7	44617410	44628979	1	BC142930.1	1922	1434	RNASEQT00000007371	44616962	44631309	4700	1638	1914	RNASEQG00000007371	11	11	11	11	10	9	1	10	9	1	8820	1139	1922	11	1434	11	27907	44628523	44628523	456	2786	trim	6	0
ENSDARG00000011020	ENSDART00000018131	11	2025046	2228956	-1	BC055499.1	1496	1167	RNASEQT00000000471	2023950	2229183	2300	1236	1415	RNASEQG00000000471	13	10	15	10	12	12	0	9	9	0	34420	78	1496	12	1167	10	52988	2028938	2028938	308	885	unchanged
ENSDARG00000011830	ENSDART00000018144	18	11596323	11677985	1	FJ843128.1	3454	2187	RNASEQT00000004913	11595461	11681537	7767	2187	3451	RNASEQG00000004913	18	15	19	15	17	17	0	14	14	0	1628	0	3454	17	2187	15	5376	11677120	11677120	865	4316	extend	0	2390	10
ENSDARG00000002071	ENSDART00000018155	13	11205453	11252385	-1	BC092877.1	2121	1368	RNASEQT00000011216	11202376	11252538	5312	1368	1497	RNASEQG00000011216	13	13	14	13	12	12	0	12	12	0	4318	1	2121	12	1368	13	8028	11206191	11206191	738	3815	extend	0	3015	34
ENSDARG00000005468	ENSDART00000018163	18	44771113	44778128	-1	BC134860.1	2221	1818	RNASEQT00000005179	44769998	44782971	4765	0		No match	2	1	4	0	1	1	0	0	0	0	470	1	2221	1	0	0	13903	44776150		242	4765	trim	74	0
ENSDARG00000020107	ENSDART00000018185	15	19862374	19877661	-1	BC086963.1	2304	1176	RNASEQT00000017282	19862281	19895755	3500	1692	2403	RNASEQG00000017282	12	12	14	12	11	11	0	11	11	0	6605	1	2033	11	1029	11	13752	19863378	19863378	1004	1097	trim	267	0
ENSDARG00000003582	ENSDART00000018190	25	3710217	3721382	-1	BC122222.1	1241	1023	RNASEQT00000010390	3710217	3721454	1314	972	1150	RNASEQG00000010390	8	7	7	6	7	6	0	6	5	0	1597	0	1241	6	971	5	3402	3710329	3710381	112	164	trim	121	0
ENSDARG00000079802	ENSDART00000018205	3	55739467	55745061	1	AF124756.1	1116	630	RNASEQT00000022816	55739338	55745496	1680	630	882	RNASEQG00000022816	3	3	3	3	2	2	0	2	2	0	153	0	1116	3	630	3	796	55744698	55744698	363	798	unchanged
ENSDARG00000013726	ENSDART00000018230	23	370634	383908	1	BC053128.1	2335	2190	RNASEQT00000009909	370577	384028	2512	2190	2347	RNASEQG00000009909	11	10	11	10	10	10	0	9	9	0	410	0	2335	11	2190	10	1694	383863	383863	45	165	unchanged
ENSDARG00000040352	ENSDART00000018235	16	30830235	30855802	1	BC095346.1	3296	1839	RNASEQT00000012938	30830161	30855977	3545	1839	2082	RNASEQG00000012938	17	16	17	16	16	16	0	15	15	0	1462	0	3296	17	1839	16	5099	30854514	30854514	1288	1463	unchanged
ENSDARG00000011023	ENSDART00000018238	1	16463750	16477758	-1	BC095249.1	1504	924	RNASEQT00000009014	16463536	16541668	6367	0	4466	No match	7	7	26	0	6	6	0	6	6	0	66	0	1370	6	0	0	279	16464289	16489844	539	1901	unchanged
ENSDARG00000016516	ENSDART00000018253	16	48986287	48994139	1	BC090261.1	887	525	RNASEQT00000012574	48986190	48994141	986	525	643	RNASEQG00000012574	6	6	6	6	5	5	0	5	5	0	22372	17	887	6	525	6	28194	48993798	48993798	341	343	trim	8	0
ENSDARG00000006215	ENSDART00000018261	4	13965434	13971771	1	BC071313.1	1156	978	RNASEQT00000021089	13965309	13999220	3988	0	2420	No match	10	10	20	0	9	9	0	9	9	0	3204	0	811	6	0	0	4401	13971636	13997652	135	1568	unchanged
ENSDARG00000016345	ENSDART00000018270	6	55311518	55319679	1	BC081621.1	1909	1440	RNASEQT00000014702	55306916	55319679	2402	1869	2141	RNASEQG00000014702	7	7	11	10	6	6	0	6	6	0	6342	0	1798	6	1440	6	22265	55319418	55319418	261	261	trim	268	0
ENSDARG00000018153	ENSDART00000018300	13	32669771	32677533	1	BC139706.1	2206	1098	0	0	0	0	0	0	0	6	6	0	0	5	5	0	5	5	0	60	0	0	0	0	0	645	32676509	0	1024	No match
ENSDARG00000012135	ENSDART00000018328	19	44262992	44285742	1	BC059683.1	2131	1299	RNASEQT00000025256	44262674	44285742	2449	1518	1825	RNASEQG00000025256	14	14	14	14	13	13	0	13	13	0	1863	0	2131	14	1299	14	4741	44285118	44285118	624	624	trim	161	0
ENSDARG00000021374	ENSDART00000018347	14	32348888	32359251	-1	BC044172.1	2350	1032	RNASEQT00000018268	32346850	32359484	4621	1032	1518	RNASEQG00000018268	9	8	9	8	8	8	0	7	7	0	4005	0	2350	9	1032	8	17424	32349953	32349953	1065	3103	trim	1059	0
ENSDARG00000020043	ENSDART00000018350	21	35763657	35774989	-1	BC153627.1	1698	858	RNASEQT00000003037	35763657	35774293	1643	858	929	RNASEQG00000003037	7	6	6	6	6	6	0	5	5	0	9535	2	1617	5	858	6	38310	35764371	35764371	714	714	trim	255	0
ENSDARG00000009612	ENSDART00000018409	11	25040882	25043717	1	BC065893.1	1713	1416	RNASEQT00000000662	25041235	25043790	1730	1356	1378	RNASEQG00000000662	11	11	9	9	10	8	0	10	8	0	538	0	1643	8	1356	8	14432	25043438	25043438	279	352	unchanged
ENSDARG00000007792	ENSDART00000018411	13	52285611	52297590	1	AY428510.1	1498	1263	RNASEQT00000011569	52285681	52297590	1428	1263	1307	RNASEQG00000011569	9	9	9	9	8	8	0	8	8	0	117	0	1428	9	1263	9	298	52297469	52297469	121	121	trim	2514	0
ENSDARG00000010555	ENSDART00000018420	24	24881399	24889754	-1	BC076185.1	1710	1182	RNASEQT00000019742	24881399	24889923	1900	1203	1432	RNASEQG00000019742	11	11	12	12	10	9	0	10	9	0	466	0	1710	11	1182	11	944	24881867	24881867	468	468	trim	8	0
ENSDARG00000023323	ENSDART00000018423	17	32706210	32731398	1	BC044412.1	2414	738	RNASEQT00000001993	32706030	32731405	2601	738	1077	RNASEQG00000001993	6	5	6	5	5	5	0	4	4	0	13777	506	2414	6	738	5	86302	32729881	32729881	1517	1524	trim	16	0
ENSDARG00000019122	ENSDART00000018432	22	14242146	14243512	1	BC133961.1	975	792	0	0	0	0	0	0	0	5	5	0	0	4	4	0	4	4	0	1005	1	0	0	0	0	4786	14243380	0	132	No match
ENSDARG00000002190	ENSDART00000018472	1	33191289	33201920	1	BC067142.1	1927	645	RNASEQT00000008567	33191062	33201916	2150	792	961	RNASEQG00000008567	6	6	6	6	5	5	0	5	5	0	6497	4	1923	6	645	6	25609	33200727	33200727	1193	1189	trim	18	0
ENSDARG00000013800	ENSDART00000018475	8	31591018	31593627	1	BC071554.1	567	384	RNASEQT00000023747	31590732	31594708	1852	384	729	RNASEQG00000023747	4	3	5	3	3	3	0	2	2	0	6875	1	567	3	384	3	9123	31593503	31593503	124	1123	unchanged
ENSDARG00000034293	ENSDART00000018500	20	20398772	20427586	-1	AY326951.1	4054	2334	RNASEQT00000015351	20398991	20427770	4019	2334	2755	RNASEQG00000015351	15	15	15	15	14	14	0	14	14	0	15416	7	3835	15	2334	15	73071	20400255	20400255	1483	1264	trim	408	0
ENSDARG00000007553	ENSDART00000018501	2	32561008	32564192	1	BC116614.1	3185	1503	RNASEQT00000004476	32552709	32562822	3331	0		No match	1	1	6	0	0	0	0	0	0	0	0	0	1730	0	0	0	4559	32562627		1565	3331	unchanged
ENSDARG00000005359	ENSDART00000018503	6	9947927	9967293	1	BC059701.1	2089	1401	RNASEQT00000014290	9947149	9967712	3286	1401	2192	RNASEQG00000014290	11	11	11	11	10	10	0	10	10	0	15083	5	2089	11	1401	11	40548	9966618	9966618	675	1094	trim	162	0
ENSDARG00000014015	ENSDART00000018504	16	32726047	32737818	-1	BC067155.1	2988	1467	RNASEQT00000012417	32726045	32737940	3112	1467	1673	RNASEQG00000012417	13	13	13	13	12	12	0	12	12	0	4883	0	2988	13	1467	13	21113	32727484	32727484	1437	1439	trim	6	0
ENSDARG00000002336	ENSDART00000018514	15	19425091	19429944	-1	AF146429.1	3566	1995	RNASEQT00000017278	19425091	19429935	3557	1995	2231	RNASEQG00000017278	9	9	9	9	8	8	0	8	8	0	1313	0	3557	9	1995	9	15281	19426417	19426417	1326	1326	trim	260	0
ENSDARG00000003564	ENSDART00000018515	8	21391017	21396694	-1	BC046086.1	1204	918	RNASEQT00000023632	21363806	21400496	5209	0	1529	No match	5	4	7	0	4	4	0	3	3	0	2173	0	1038	3	0	0	7174	21391131	21398781	114	3680	unchanged
ENSDARG00000003977	ENSDART00000018519	20	25909945	25915613	1	BC122435.1	1442	1320	RNASEQT00000015879	25909433	25916838	3179	1320	1833	RNASEQG00000015879	5	5	5	5	4	4	0	4	4	0	277	0	1442	5	1320	5	1764	25915492	25915492	121	1346	unchanged
ENSDARG00000005191	ENSDART00000018523	6	49877781	49917952	1	AY398307.1	1920	1302	0	0	0	0	0	0	0	10	10	0	0	9	9	0	9	9	0	29056	9	0	0	0	0	72221	49917443	0	509	No match
ENSDARG00000011233	ENSDART00000018524	2	9544393	9568854	1	BC092816.1	1658	1125	RNASEQT00000003706	9544198	9572728	5727	1125	1419	RNASEQG00000003706	9	8	9	8	8	8	0	7	7	0	1727	0	1658	9	1125	8	6108	9568420	9568420	434	4308	extend	0	3408	332
ENSDARG00000014963	ENSDART00000018532	10	1708216	1711579	1	BC093163.1	989	225	0	0	0	0	0	0	0	2	2	0	0	1	1	0	1	1	0	310	0	0	0	0	0	3774	1710938	0	641	No match
ENSDARG00000002613	ENSDART00000018553	19	25950690	25952757	1	BC071377.1	550	366	RNASEQT00000025094	25950577	25952753	659	366	579	RNASEQG00000025094	4	4	4	4	3	3	0	3	3	0	1964	0	546	4	366	4	3877	25952673	25952673	84	80	trim	444	0
ENSDARG00000011801	ENSDART00000018570	9	22105704	22131750	-1	BC090784.1	1238	1095	RNASEQT00000016793	22105457	22131785	1520	1095	1142	RNASEQG00000016793	6	6	6	6	5	5	0	5	5	0	393	0	1238	6	1095	6	1440	22105835	22105835	131	378	unchanged
ENSDARG00000004199	ENSDART00000018578	25	28402836	28408322	-1	BC129367.1	1494	1320	RNASEQT00000010993	28402652	28408341	1697	1326	1381	RNASEQG00000010993	4	3	4	3	3	3	0	2	2	0	118	0	1494	4	1320	3	413	28402968	28402968	132	316	unchanged
ENSDARG00000030058	ENSDART00000018603	15	26736443	26760084	1	AF179406.1	2222	1632	RNASEQT00000017804	26747194	26760583	2206	1389	1395	RNASEQG00000017804	9	8	6	6	8	7	1	7	6	1	60	3	1705	5	1389	5	305	26759772	26759772	312	811	unchanged
ENSDARG00000002967	ENSDART00000018626	3	40272490	40279354	-1	BC045997.1	1245	537	0	0	0	0	0	0	0	6	6	0	0	5	5	0	5	5	0	7732	0	0	0	0	0	6974	40272920	0	430	No match
ENSDARG00000008678	ENSDART00000018640	20	32444937	32471745	1	BC107638.1	1242	489	RNASEQT00000015473	32444881	32471751	1304	489	587	RNASEQG00000015473	4	4	4	4	3	3	0	3	3	0	1888	0	1242	4	489	4	14852	32471034	32471034	711	717	trim	94	0
ENSDARG00000017741	ENSDART00000018651	14	26935221	26944720	-1	BC045874.1	2047	1434	RNASEQT00000018213	26935221	26945130	2457	1434	1981	RNASEQG00000018213	12	11	12	11	11	11	0	10	10	0	29957	5	2047	12	1434	11	76506	26935697	26935697	476	476	trim	2815	0
ENSDARG00000019819	ENSDART00000018663	8	42259029	42260609	-1	BC163344.1	1581	1530	0	0	0	0	0	0	0	1	1	0	0	0	0	0	0	0	0	0	0	0	0	0	0	733	42259047	0	18	No match
ENSDARG00000015575	ENSDART00000018676	3	40964027	40971314	-1	BC052130.1	1878	1518	RNASEQT00000022035	40964027	40971473	2037	1518	1789	RNASEQG00000022035	14	13	14	13	13	13	0	12	12	0	14698	23	1878	14	1518	13	9617	40964275	40964275	248	248	trim	217	0
ENSDARG00000003813	ENSDART00000018678	17	10511337	10526998	-1	BC067588.1	2280	1515	RNASEQT00000002292	10511201	10527054	2502	1515	1750	RNASEQG00000002292	18	15	17	15	17	16	0	14	14	0	21195	6	2280	16	1515	15	32676	10511953	10511953	586	752	unchanged
ENSDARG00000013478	ENSDART00000018686	16	5185303	5191392	-1	BC046037.1	1006	750	RNASEQT00000012117	5185303	5191511	1125	750	898	RNASEQG00000012117	5	5	5	5	4	4	0	4	4	0	2172	0	1006	5	750	5	5642	5185530	5185530	227	227	trim	127	0
ENSDARG00000014134	ENSDART00000018726	3	50619997	50787901	-1	BC133159.1	2199	1059	0	0	0	0	0	0	0	10	10	0	0	9	5	0	9	5	0	3928	0	0	0	0	0	8450	50620565	0	568	No match
ENSDARG00000010583	ENSDART00000018729	2	43306091	43431174	1	AY524777.1	4175	3339	RNASEQT00000004044	43306041	43495227	9564	3999	4271	RNASEQG00000004044	21	21	24	24	20	20	0	20	20	0	5312	29	3554	20	3332	20	11878	43430560	43489934	614	5293	extend	0	4389	15
ENSDARG00000013802	ENSDART00000018741	1	48010	53546	-1	BC085454.1	1624	1200	RNASEQT00000008287	48010	54289	2465	879	2157	RNASEQG00000008287	15	14	14	9	14	13	0	13	12	0	4653	0	1624	13	879	8	5292	48318	48318	308	308	trim	198	0
ENSDARG00000010721	ENSDART00000018750	14	34273942	34302949	-1	BC056592.1	1536	1284	RNASEQT00000018289	34272769	34303057	6437	1407	1413	RNASEQG00000018289	11	10	11	10	10	10	0	9	9	0	15338	10	1536	10	1284	10	28384	34280374	34280374	231	5024	trim	53	0
ENSDARG00000008133	ENSDART00000018764	18	17142728	17144587	-1	BC055156.1	1860	1083	0	0	0	0	0	0	0	1	1	0	0	0	0	0	0	0	0	0	0	0	0	0	0	1177	17143416	0	688	No match
ENSDARG00000011555	ENSDART00000018792	5	70902009	70916676	-1	BC054697.1	1850	693	RNASEQT00000006240	70908671	70916843	1167	693	876	RNASEQG00000006240	8	7	7	7	7	6	0	6	6	0	8400	3	933	6	693	7	22920	70908962	70908962	1141	291	trim	372	0
ENSDARG00000010442	ENSDART00000018817	1	52625139	52632238	1	BC053118.1	2793	441	RNASEQT00000008737	52625076	52632238	2856	441	831	RNASEQG00000008737	3	3	3	3	2	2	0	2	2	0	274	0	2793	3	441	3	12899	52630213	52630213	2025	2025	extend	0	1600	0
ENSDARG00000021398	ENSDART00000018818	2	45022379	45032980	-1	BC088385.1	5744	1026	RNASEQT00000004062	45023996	45033052	4199	1026	1163	RNASEQG00000004062	5	4	5	4	4	4	0	3	3	0	256	0	4127	5	1026	4	3547	45027032	45027032	4653	3036	extend	0	2633	1
ENSDARG00000011666	ENSDART00000018840	13	49380004	49402597	-1	BC044350.1	4401	4110	RNASEQT00000011552	49380005	49402635	4438	4110	4312	RNASEQG00000011552	10	10	10	10	9	9	0	9	9	0	4356	0	4400	10	4110	10	25482	49380131	49380131	127	126	trim	1171	0
ENSDARG00000009470	ENSDART00000018862	8	41755152	41769810	1	AF244934.1	2958	1683	RNASEQT00000023818	41758552	41770137	2713	1365	1387	RNASEQG00000023818	10	10	9	9	9	7	1	9	7	1	66	6	2386	8	1365	8	3389	41768811	41768811	999	1326	unchanged
ENSDARG00000018491	ENSDART00000018868	24	17883787	17890563	1	BC063979.1	2399	1929	RNASEQT00000019677	17876910	17890560	2133	1908	1910	RNASEQG00000019677	10	10	11	11	9	9	0	9	9	0	13501	1	2128	9	1905	9	45625	17890337	17890337	226	223	trim	3	0
ENSDARG00000006240	ENSDART00000018908	3	53183036	53241702	1	BC090824.1	2903	1944	RNASEQT00000022102	53182958	53241702	2981	1944	2263	RNASEQG00000022102	13	12	13	12	12	12	0	11	11	0	12509	0	2903	13	1944	12	16638	53240984	53240984	718	718	trim	106	0
ENSDARG00000006793	ENSDART00000018909	8	5046737	5059356	1	BC122433.1	974	813	RNASEQT00000022953	5045757	5059345	1943	813	1834	RNASEQG00000022953	7	7	7	7	6	5	1	6	5	1	6321	1062	963	7	813	7	16675	5059236	5059236	120	109	trim	10	0
ENSDARG00000076225	ENSDART00000018939	12	36926356	36944716	-1	BC072718.1	1423	1242	RNASEQT00000014028	36925733	36944827	2157	1242	1444	RNASEQG00000014028	7	7	7	7	6	6	0	6	6	0	405	1	1423	7	1242	7	1150	36926446	36926446	90	713	unchanged
ENSDARG00000002795	ENSDART00000018945	15	6727919	6753819	-1	AF222995.1	2602	1248	RNASEQT00000017179	6727816	6754020	3299	1248	1633	RNASEQG00000017179	14	12	13	12	13	12	0	11	11	0	1267	0	2602	12	1248	12	3396	6729482	6729482	1170	1666	trim	212	0
ENSDARG00000016773	ENSDART00000018948	11	18459051	18464054	-1	EF195766.1	1326	615	RNASEQT00000000624	18458102	18464474	2695	0		No match	3	2	3	0	2	2	0	1	1	0	164	0	1326	3	0	0	1665	18459348		297	2695	unchanged
ENSDARG00000007222	ENSDART00000018955	14	53551088	53557593	1	DQ377344.1	2565	2565	0	0	0	0	0	0	0	3	3	0	0	2	2	0	2	2	0	280	0	0	0	0	0	7515	53557593	0	0	No match
ENSDARG00000020820	ENSDART00000018971	6	21613041	21639544	1	BC152635.1	1878	1782	RNASEQT00000014392	21612957	21641156	3574	1854	1881	RNASEQG00000014392	16	16	16	16	15	15	0	15	15	0	10320	0	1878	16	1782	16	13047	21639463	21639463	81	1693	extend	0	1286	0
ENSDARG00000002506	ENSDART00000018972	7	44602709	44610814	-1	BC076286.1	1210	459	RNASEQT00000007370	44602709	44611009	1405	600	811	RNASEQG00000007370	4	4	4	4	3	3	0	3	3	0	2143	2	1210	4	459	4	12479	44603303	44603303	594	594	trim	792	0
ENSDARG00000016765	ENSDART00000018973	19	9607852	9624018	1	BC085533.1	2082	1026	RNASEQT00000024953	9607697	9624107	2326	1026	1450	RNASEQG00000024953	9	9	9	9	8	8	0	8	8	0	2663	1	2082	9	1026	9	8564	9623231	9623231	787	876	trim	441	0
ENSDARG00000004034	ENSDART00000019004	3	27864778	27919731	1	BC056296.1	2377	615	RNASEQT00000021849	27864261	27919730	2526	615	792	RNASEQG00000021849	6	5	7	5	5	5	0	4	4	0	17706	3	2376	5	615	5	45974	27917996	27917996	1735	1734	extend	0	1457	0
ENSDARG00000007220	ENSDART00000019006	15	17312414	17518321	-1	AY029401.1	3738	3096	RNASEQT00000017257	17310914	17518486	5400	3093	3468	RNASEQG00000017257	20	20	20	20	19	18	1	19	18	1	1602	5	3735	19	3093	19	4717	17312846	17312846	432	1932	trim	122	0
ENSDARG00000006370	ENSDART00000019029	2	30501605	30561699	1	BC071441.1	1749	1392	RNASEQT00000003911	30501437	30561702	1974	1446	1690	RNASEQG00000003911	13	12	14	13	12	12	0	11	11	0	10019	0	1749	13	1392	12	14695	30561418	30561418	281	284	trim	49	0
ENSDARG00000016363	ENSDART00000019035	7	27555810	27562304	-1	AY007990.1	2261	666	RNASEQT00000007172	27557621	27562593	1565	666	1005	RNASEQG00000007172	5	4	4	4	4	3	0	3	3	0	455	0	1184	3	666	4	3823	27558181	27558181	1545	560	trim	80	0
ENSDARG00000046098	ENSDART00000019045	23	19436613	19441822	-1	BC076453.1	1362	699	RNASEQT00000010074	19436423	19441914	1644	699	897	RNASEQG00000010074	5	4	5	4	4	4	0	3	3	0	1766	1	1362	5	699	4	5481	19437170	19437170	557	747	unchanged
ENSDARG00000005828	ENSDART00000019053	9	24781747	24788676	1	BC076203.1	995	540	RNASEQT00000016818	24781675	24792216	4607	540	737	RNASEQG00000016818	5	4	5	4	4	4	0	3	3	0	358	0	995	5	540	4	1382	24788346	24788346	330	3870	unchanged
ENSDARG00000012591	ENSDART00000019063	2	36442292	36452794	1	BC067550.1	1147	633	RNASEQT00000003971	36422058	36452794	3901	0	1780	No match	8	7	20	0	7	7	0	6	6	0	5138	3	1147	7	0	0	8896	36452405	36441317	389	2121	trim	471	0
ENSDARG00000002330	ENSDART00000019078	2	10997100	11001473	1	AY664404.1	1508	999	0	0	0	0	0	0	0	8	8	0	0	7	7	0	7	7	0	1729	0	0	0	0	0	4043	11001097	0	376	No match
ENSDARG00000012539	ENSDART00000019098	3	27930095	27935505	-1	BC076479.1	1237	837	RNASEQT00000022560	27932879	27935536	435	306	433	RNASEQG00000022560	9	8	4	3	8	4	0	7	3	0	24	0	404	3	306	2	60	27930399	27932881	304	2	unchanged
ENSDARG00000012366	ENSDART00000019104	5	46432655	46448200	-1	BC080232.1	1188	1017	RNASEQT00000006696	46431670	46448456	2429	1017	1322	RNASEQG00000006696	7	7	7	7	6	6	0	6	6	0	2089	0	1188	7	1017	7	4836	46432777	46432777	122	1107	unchanged
ENSDARG00000006375	ENSDART00000019111	23	19186291	19196750	-1	BC085395.1	1860	1119	RNASEQT00000010065	18969919	19192499	428	0	427	No match	10	9	3	0	9	2	0	8	2	0	35	0	113	0	0	0	11095	19186769	18969920	478	1	unchanged
ENSDARG00000014159	ENSDART00000019136	19	34270844	34289691	-1	BC068430.1	3186	1629	RNASEQT00000025185	34270844	34289894	3392	1632	1899	RNASEQG00000025185	12	12	12	12	11	11	0	11	11	0	7678	1	3186	11	1629	11	39499	34272337	34272337	1493	1493	trim	206	0
ENSDARG00000001910	ENSDART00000019140	7	30875147	30908081	-1	BC051158.1	4121	1425	RNASEQT00000007217	30875147	30908645	4685	1425	2074	RNASEQG00000007217	10	10	10	10	9	9	0	9	9	0	2102	2	4121	10	1425	10	18566	30877758	30877758	2611	2611	trim	15	0
ENSDARG00000017338	ENSDART00000019181	20	29769812	29809552	1	BC061450.1	5959	5019	RNASEQT00000015454	29769726	29809549	6195	5196	5442	RNASEQG00000015454	28	27	30	29	27	26	1	26	25	1	7328	286	5956	28	5019	27	31552	29808796	29808796	756	753	trim	403	0
ENSDARG00000019920	ENSDART00000019196	20	35098592	35100992	-1	AF172089.1	1375	1077	RNASEQT00000015509	35098592	35101104	1487	1077	1222	RNASEQG00000015509	4	4	4	4	3	3	0	3	3	0	171	1	1375	4	1077	4	1350	35098857	35098857	265	265	trim	100	0
ENSDARG00000019312	ENSDART00000019199	21	29284533	29289139	-1	BC142804.1	1317	642	RNASEQT00000003468	29284012	29289263	1962	642	1078	RNASEQG00000003468	3	2	3	2	2	2	0	1	1	0	131	0	1317	3	642	2	1639	29284896	29284896	363	884	unchanged
ENSDARG00000013453	ENSDART00000019202	13	31625767	31646845	1	EU817488.1	4323	4029	RNASEQT00000011872	31625631	31647000	4614	4029	4165	RNASEQG00000011872	35	35	35	35	34	33	1	34	33	1	3678	64	4323	35	4029	35	5388	31646551	31646551	294	449	unchanged
ENSDARG00000003205	ENSDART00000019206	19	21243965	21259487	-1	BC095313.1	2123	1935	RNASEQT00000025063	21243407	21259695	2889	1935	2189	RNASEQG00000025063	11	11	11	11	10	10	0	10	10	0	3006	0	2123	11	1935	11	8227	21244107	21244107	142	700	trim	82	0
ENSDARG00000040632	ENSDART00000019233	18	31561916	31566283	-1	BC163066.1	2682	2607	0	0	0	0	0	0	0	6	6	0	0	5	0	0	5	0	0	0	0	0	0	0	0	60	31561957	0	41	No match
ENSDARG00000017230	ENSDART00000019252	10	21525870	21551794	1	BC056809.1	2502	1584	RNASEQT00000024168	21525684	21551773	2667	1596	1810	RNASEQG00000024168	13	12	13	12	12	12	0	11	11	0	9908	0	2481	13	1584	12	22109	21546763	21546763	878	857	trim	2268	0
ENSDARG00000002666	ENSDART00000019267	10	40668323	40671704	1	BC142809.1	1511	1128	RNASEQT00000024761	40647184	40671845	3784	0		No match	2	1	10	0	1	1	0	0	0	0	53	0	1511	1	0	0	2349	40671382		322	3784	unchanged
ENSDARG00000014403	ENSDART00000019269	5	56069369	56093307	-1	BC058317.1	4404	3012	RNASEQT00000006106	56067796	56092783	6400	3054	3502	RNASEQG00000006106	18	17	18	18	17	17	0	16	16	0	2208	1	4360	17	3012	16	7932	56070694	56070694	1325	2898	trim	108	0
ENSDARG00000011301	ENSDART00000019270	7	45761862	45782260	-1	BC151887.1	1817	1602	RNASEQT00000007378	45761862	45782300	1857	1602	1705	RNASEQG00000007378	20	20	20	20	19	19	0	19	19	0	6014	0	1817	20	1602	20	3776	45762014	45762014	152	152	trim	95	0
ENSDARG00000003375	ENSDART00000019281	2	10078447	10130061	-1	BC068343.1	1699	219	RNASEQT00000003720	10078442	10130126	1769	231	471	RNASEQG00000003720	3	2	3	2	2	2	0	1	1	0	273	1	1699	3	219	2	3718	10079740	10079740	1293	1298	trim	186	0
ENSDARG00000003229	ENSDART00000019296	14	23460208	23467139	1	AY833104.1	2077	1257	RNASEQT00000018635	23445966	23467360	1982	0		No match	2	2	4	0	1	1	0	1	1	0	116	0	1743	1	0	0	4555	23466396		743	1982	unchanged
ENSDARG00000015167	ENSDART00000019318	24	31212728	31234174	1	BC044468.1	2801	1971	RNASEQT00000019802	31212757	31234171	2769	1971	2114	RNASEQG00000019802	23	23	23	23	22	22	0	22	22	0	7676	0	2769	23	1971	23	10044	31233516	31233516	658	655	trim	394	0
ENSDARG00000013168	ENSDART00000019323	13	35560774	35609318	1	AY221106.1	4385	3642	RNASEQT00000011448	35560629	35609048	4260	3642	4050	RNASEQG00000011448	26	26	26	26	25	23	0	25	23	0	2575	0	4115	26	3642	26	5632	35608838	35608838	480	210	trim	3029	0
ENSDARG00000006040	ENSDART00000019325	6	9863332	9880111	1	BC054588.1	1750	1392	RNASEQT00000014825	9863257	9880238	1952	1392	1579	RNASEQG00000014825	13	13	13	13	12	12	0	12	12	0	2405	0	1750	13	1392	13	4174	9879865	9879865	246	373	unchanged
ENSDARG00000004141	ENSDART00000019326	15	14434784	14456240	1	BC076118.1	1034	546	RNASEQT00000017679	14434638	14456545	1485	768	959	RNASEQG00000017679	7	6	7	7	6	6	0	5	5	0	1656	0	1034	7	546	5	3153	14456019	14456019	221	526	unchanged
ENSDARG00000012915	ENSDART00000019330	15	6854622	6873920	-1	BC083254.1	1567	927	RNASEQT00000017180	6854622	6868112	1063	627	639	RNASEQG00000017180	10	10	7	7	9	6	0	9	6	0	2672	0	1062	6	627	6	5757	6855046	6855046	424	424	trim	444	0
ENSDARG00000032496	ENSDART00000019353	16	26885900	26895558	-1	BC080844.1	3784	1071	0	0	0	0	0	0	0	9	9	0	0	8	7	1	8	7	1	1252	150	0	0	0	0	2730	26888556	0	2656	No match
ENSDARG00000016233	ENSDART00000019392	2	11274377	11295567	-1	BC066732.1	1294	921	RNASEQT00000003730	11274377	11295913	1640	921	1536	RNASEQG00000003730	7	6	7	6	6	6	0	5	5	0	1883	3	1294	7	921	6	4048	11274481	11274481	104	104	trim	962	0
ENSDARG00000010625	ENSDART00000019396	14	34891741	34901028	-1	BC076239.1	1380	720	RNASEQT00000018304	34891741	34901132	1484	720	969	RNASEQG00000018304	6	6	6	6	5	5	0	5	5	0	1119	0	1380	6	720	6	4703	34892256	34892256	515	515	trim	1726	0
ENSDARG00000014536	ENSDART00000019408	21	28860488	28904258	-1	BC152140.1	747	369	RNASEQT00000002976	28860488	28904406	895	369	528	RNASEQG00000002976	4	4	4	4	3	3	0	3	3	0	3208	0	747	4	369	4	10883	28860855	28860855	367	367	trim	517	0
ENSDARG00000004363	ENSDART00000019416	10	32906129	32993049	1	BC086720.1	2117	603	RNASEQT00000024253	32906071	32993048	2174	603	975	RNASEQG00000024253	4	3	4	3	3	3	0	2	2	0	525	0	2116	4	603	3	5701	32991849	32991849	1200	1199	extend	0	752	0
ENSDARG00000004680	ENSDART00000019417	2	29818200	29831296	1	BC075905.1	1293	951	RNASEQT00000004441	29817984	29834308	1748	996	1283	RNASEQG00000004441	10	9	12	10	9	9	0	8	8	0	7937	1	963	9	892	8	10803	29831025	29833015	271	465	unchanged
ENSDARG00000007808	ENSDART00000019427	13	31603387	31613234	-1	BC055620.1	1733	1164	RNASEQT00000011400	31603387	31613277	2919	1164	1336	RNASEQG00000011400	12	10	11	10	11	10	0	9	9	0	1730	0	1733	10	1164	10	3236	31604970	31604970	440	1583	trim	68	0
ENSDARG00000029011	ENSDART00000019442	22	27709264	27732023	-1	BC116573.1	2140	1863	RNASEQT00000001167	27709259	27732109	2231	1863	2059	RNASEQG00000001167	20	19	20	19	19	19	0	18	18	0	5824	1	2140	20	1863	19	5729	27709431	27709431	167	172	trim	695	0
ENSDARG00000006603	ENSDART00000019455	23	5815382	5833271	-1	BC065956.1	2644	579	RNASEQT00000009534	5816834	5833357	1278	579	781	RNASEQG00000009534	6	5	6	5	5	5	0	4	4	0	3001	8	1192	6	579	5	9460	5817331	5817331	1949	497	trim	1369	0
ENSDARG00000079698	ENSDART00000019458	4	10544268	10547564	1	BC076370.1	1369	861	RNASEQT00000021047	10544207	10547726	1592	861	1001	RNASEQG00000021047	6	6	6	6	5	5	0	5	5	0	184	0	1369	6	861	6	705	10547135	10547135	429	591	unchanged
ENSDARG00000002300	ENSDART00000019461	5	14011722	14026298	-1	BC163068.1	1347	1203	RNASEQT00000006436	14011622	14026311	1460	1203	1292	RNASEQG00000006436	12	12	12	12	11	10	1	11	10	1	147	20	1347	12	1203	12	207	14011790	14011790	68	168	unchanged
ENSDARG00000003681	ENSDART00000019476	20	18774951	18786108	1	AY577010.1	2049	1290	RNASEQT00000015332	18774868	18786108	2132	1290	1860	RNASEQG00000015332	12	10	12	10	11	11	0	9	9	0	32957	2	2049	12	1290	10	57672	18785836	18785836	272	272	trim	1261	0
ENSDARG00000003113	ENSDART00000019519	23	26233789	26263995	-1	BC076532.1	2319	1089	RNASEQT00000009703	26233789	26264410	2734	1089	1604	RNASEQG00000009703	11	11	11	11	10	10	0	10	10	0	6489	14	2319	11	1089	11	19666	26234919	26234919	1130	1130	trim	11	0
ENSDARG00000005350	ENSDART00000019521	23	27599361	27683170	-1	BC068015.1	6256	4734	RNASEQT00000009718	27599361	27683265	6351	4734	4969	RNASEQG00000009718	38	38	38	38	37	36	1	37	36	1	8025	279	6256	38	4734	38	22265	27600743	27600743	1382	1382	trim	73	0
ENSDARG00000015515	ENSDART00000019555	2	28100596	28101736	1	BC163227.1	1141	981	0	0	0	0	0	0	0	1	1	0	0	0	0	0	0	0	0	0	0	0	0	0	0	153	28101640	0	96	No match
ENSDARG00000004864	ENSDART00000019561	5	60147744	60153128	1	BC151951.1	1219	966	RNASEQT00000006803	60134092	60153134	4017	966	3804	RNASEQG00000006803	6	6	10	6	5	5	0	5	5	0	619	0	1219	5	966	6	1782	60152921	60152921	207	213	unchanged
ENSDARG00000016301	ENSDART00000019573	1	56764170	56770654	-1	BC071501.1	1583	1335	RNASEQT00000009359	56764151	56770684	1632	1335	1468	RNASEQG00000009359	4	4	4	4	3	3	0	3	3	0	2226	1	1583	4	1335	4	16903	56764315	56764315	145	164	unchanged
ENSDARG00000003616	ENSDART00000019581	18	18660537	18681728	1	BC057523.1	2363	1584	RNASEQT00000004992	18659766	18683283	4689	1584	2442	RNASEQG00000004992	14	14	14	14	13	12	1	13	12	1	4942	603	2363	14	1584	14	11101	18681036	18681036	692	2247	trim	56	0
ENSDARG00000020427	ENSDART00000019593	2	24901212	24909605	-1	BC074087.1	1860	1224	RNASEQT00000004410	24901200	24909690	1957	1287	1349	RNASEQG00000004410	5	5	5	5	4	4	0	4	4	0	389	0	1860	5	1224	5	3490	24901808	24901808	596	608	unchanged
ENSDARG00000004187	ENSDART00000019595	21	5408460	5413346	1	BC110094.1	1499	984	0	0	0	0	0	0	0	5	5	0	0	4	3	0	4	3	0	791	0	0	0	0	0	5380	5412909	0	437	No match
ENSDARG00000004952	ENSDART00000019617	17	35524586	35528463	-1	BC096889.1	1629	1080	RNASEQT00000002507	35524608	35528484	1628	1080	1121	RNASEQG00000002507	6	6	6	6	5	5	0	5	5	0	351	0	1607	6	1080	6	1006	35525115	35525115	529	507	unchanged
ENSDARG00000021945	ENSDART00000019620	23	14305539	14328486	-1	BC060524.1	3127	2424	RNASEQT00000009588	14305539	14328511	3152	2424	2513	RNASEQG00000009588	17	16	17	16	16	14	2	15	14	1	8770	1044	3127	17	2424	16	29255	14306178	14306178	639	639	trim	369	0
ENSDARG00000041689	ENSDART00000019636	15	20214200	20222832	1	BC049481.1	1490	930	RNASEQT00000017286	20213784	20222832	1881	900	1470	RNASEQG00000017286	11	10	11	10	10	9	1	9	8	1	3926	655	1460	9	900	9	7717	20222421	20222421	411	411	trim	823	0
ENSDARG00000020101	ENSDART00000019647	4	13992340	13997750	1	BC053187.1	1455	1302	RNASEQT00000021089	13965309	13999220	3988	1302	2420	RNASEQG00000021089	12	12	20	12	11	11	0	11	11	0	11171	2	1455	11	1302	12	14093	13997652	13997652	98	1568	unchanged
ENSDARG00000020344	ENSDART00000019648	5	68956831	68974599	1	BC049409.1	1911	1497	RNASEQT00000006901	68956772	68988954	2980	1485	1692	RNASEQG00000006901	10	10	16	11	9	9	0	9	9	0	1119	1	1498	9	1350	9	4765	68974333	68981165	266	1288	unchanged
ENSDARG00000020960	ENSDART00000019661	3	47647358	47688692	1	BC056769.1	2890	1344	RNASEQT00000022074	47647352	47690324	4578	2322	2417	RNASEQG00000022074	22	15	21	21	21	19	1	14	13	0	10729	1285	2890	19	1344	12	10830	47674076	47688163	1457	2161	trim	649	0
ENSDARG00000009886	ENSDART00000019667	23	3517313	3525294	-1	AY609381.4	1209	666	RNASEQT00000009503	3515251	3525094	3071	666	975	RNASEQG00000009503	6	6	6	6	5	5	0	5	5	0	2283	0	1009	6	666	6	4242	3517347	3517347	34	2096	trim	50	0
ENSDARG00000016470	ENSDART00000019698	1	21428978	21439189	1	BC155280.1	1869	954	RNASEQT00000008475	21428824	21439221	2055	954	1218	RNASEQG00000008475	13	12	13	12	12	12	0	11	11	0	12057	1	1869	13	954	12	21161	21438384	21438384	805	837	trim	428	0
ENSDARG00000012827	ENSDART00000019699	7	23045032	23055548	-1	BC067182.1	1957	1755	RNASEQT00000007102	23045026	23057136	2746	1755	2640	RNASEQG00000007102	11	11	12	11	10	10	0	10	10	0	3276	0	1872	10	1755	11	6088	23045132	23045132	100	106	trim	18	0
ENSDARG00000003090	ENSDART00000019701	15	30736120	30743311	1	AF012747.1	1175	957	0	0	0	0	0	0	0	2	1	0	0	1	0	0	0	0	0	0	0	0	0	0	0	6	30743162	0	149	No match
ENSDARG00000015686	ENSDART00000019705	24	7974760	8049191	1	BC090689.1	2345	1254	RNASEQT00000020016	7974750	8071001	3423	1254	1857	RNASEQG00000020015	7	7	9	7	6	6	0	6	6	0	181	0	2345	6	1254	7	1000	8048693	8048693	498	1566	unchanged
ENSDARG00000013224	ENSDART00000019706	6	48095543	48139859	1	BC139540.1	3638	2562	RNASEQT00000014624	48078075	48139863	3631	2562	2753	RNASEQG00000014624	15	14	15	14	14	14	0	13	13	0	1684	0	3497	14	2562	14	6660	48138985	48138985	874	878	trim	110	0
ENSDARG00000003866	ENSDART00000019743	1	28743380	28769605	1	BC152673.1	3041	1977	RNASEQT00000009102	28711882	28769740	9374	0	5504	No match	17	17	38	0	16	16	0	16	16	0	20142	1	3041	16	0	0	46959	28768680	28742599	925	3870	unchanged
ENSDARG00000016903	ENSDART00000019750	21	16871613	16886576	-1	BC066729.1	2644	1005	RNASEQT00000002842	16871614	16889427	4273	1005	2848	RNASEQG00000002842	14	13	16	13	13	13	0	12	12	0	13018	0	2538	13	1005	13	48814	16873039	16873039	1426	1425	trim	716	0
ENSDARG00000002894	ENSDART00000019759	20	29257480	29295268	1	BC116469.1	2328	969	RNASEQT00000015910	29257377	29294036	1202	972	1116	RNASEQG00000015910	6	6	6	6	5	5	0	5	5	0	890	9	1096	5	969	5	15712	29293950	29293950	1318	86	unchanged
ENSDARG00000008784	ENSDART00000019762	2	32528356	32543765	-1	BC046005.1	1855	1473	RNASEQT00000004474	32524799	32545260	6787	2853	4321	RNASEQG00000004474	5	4	20	16	4	3	0	3	2	0	484	0	1407	2	1266	1	9158	32528639	32530278	283	2466	unchanged
ENSDARG00000019367	ENSDART00000019766	17	52587624	52620507	-1	AY614705.1	2064	1233	RNASEQT00000002129	52587616	52620520	2085	1233	1546	RNASEQG00000002129	7	7	7	7	6	6	0	6	6	0	2379	1	2064	7	1233	7	12474	52588155	52588155	531	539	trim	2529	0
ENSDARG00000015757	ENSDART00000019774	13	46105371	46115752	1	BC044368.1	1682	495	RNASEQT00000011535	46105367	46115746	1690	495	625	RNASEQG00000011535	7	6	7	6	6	5	1	5	5	0	5335	32	1676	6	495	6	31821	46114681	46114681	1071	1065	trim	103	0
ENSDARG00000029356	ENSDART00000019813	16	7608901	7638408	-1	BC085443.1	1837	1176	RNASEQT00000012142	7608894	7638483	2323	1491	1680	RNASEQG00000012142	11	11	13	13	10	9	0	10	9	0	3778	0	1837	10	1087	10	13104	7609448	7609537	547	643	trim	148	0
ENSDARG00000017140	ENSDART00000019828	8	4822035	4902999	-1	BC055151.1	1669	831	RNASEQT00000022948	4822038	4903063	4242	1053	1239	RNASEQG00000022948	9	8	12	11	8	7	0	7	6	0	2123	1	1666	7	672	6	11265	4822751	4825041	716	3003	trim	203	0
ENSDARG00000002764	ENSDART00000019831	18	5818391	5828194	-1	BC097218.1	1022	837	RNASEQT00000005284	5818053	5828381	1547	852	1060	RNASEQG00000005284	10	10	10	10	9	9	0	9	9	0	653	0	1022	10	837	10	804	5818540	5818540	149	487	unchanged
ENSDARG00000011376	ENSDART00000019854	22	5611718	5624568	1	BC063237.1	3283	849	RNASEQT00000001310	5611293	5622523	1663	849	1494	RNASEQG00000001310	9	8	9	8	8	8	0	7	7	0	2050	0	1238	9	849	8	3931	5622354	5622354	2214	169	unchanged
ENSDARG00000014634	ENSDART00000019861	18	21426027	21465766	-1	AY261515.1	4143	3225	RNASEQT00000005032	21426016	21465776	4164	3225	3681	RNASEQG00000005032	23	22	23	22	22	21	1	21	20	1	7487	294	4143	23	3225	22	17953	21426499	21426499	472	483	trim	597	0
ENSDARG00000013075	ENSDART00000019898	14	31427034	31489978	1	BC076246.1	852	591	RNASEQT00000018250	31426997	31489972	883	591	765	RNASEQG00000018250	6	5	6	5	5	5	0	4	4	0	3435	0	846	6	591	5	4653	31489854	31489854	124	118	trim	55	0
ENSDARG00000004148	ENSDART00000019920	Zv9_scaffold3455	137387	148097	-1	AY271745.1	1500	1074	RNASEQT00000018874	134482	142304	3710	1812	381	No match	11	11	4	12	10	8	0	10	8	0	3426	0	801	3	673	4	8157	137811	137811	424	3329	trim	4	0
ENSDARG00000016809	ENSDART00000019936	1	56466029	56495652	1	BC078343.1	2663	1056	RNASEQT00000008802	56465999	56494495	1536	1056	1510	RNASEQG00000008802	10	10	10	10	9	9	0	9	9	0	2489	0	1506	10	1056	10	10073	56494469	56494469	1183	26	trim	2822	0
ENSDARG00000010255	ENSDART00000019939	6	38811053	38824167	1	BC044473.1	2111	1575	RNASEQT00000014515	38810825	38824358	2530	1575	1983	RNASEQG00000014515	13	12	13	12	12	12	0	11	11	0	3628	0	2111	13	1575	12	8546	38823811	38823811	356	547	trim	105	0
ENSDARG00000011170	ENSDART00000019949	7	4109909	4209758	-1	BC086746.1	1775	1107	RNASEQT00000006985	4110201	4210173	1757	1107	1567	RNASEQG00000006985	16	15	17	15	15	15	0	14	14	0	7135	0	1361	15	1107	15	6661	4110391	4110391	482	190	trim	683	0
ENSDARG00000058980	ENSDART00000019953	Zv9_NA892	103570	106640	1	AY928186.1	3071	1572	0	0	0	0	0	0	0	1	1	0	0	0	0	0	0	0	0	0	0	0	0	0	0	4840	105386	0	1254	No match
ENSDARG00000021046	ENSDART00000019976	15	35200934	35212741	1	BC092835.1	1640	1008	RNASEQT00000017885	35200895	35213088	2026	1008	1205	RNASEQG00000017885	8	7	8	7	7	7	0	6	6	0	808	0	1640	8	1008	7	2423	35212267	35212267	474	821	unchanged
ENSDARG00000004151	ENSDART00000019983	13	1254310	1267358	1	BC095213.1	1520	714	RNASEQT00000011619	1254290	1267990	2172	714	1124	RNASEQG00000011619	7	6	7	6	6	6	0	5	5	0	856	1	1520	7	714	6	2189	1266942	1266942	416	1048	unchanged
ENSDARG00000013051	ENSDART00000019987	5	32023576	32030835	1	BC127593.1	1414	876	RNASEQT00000006574	32023303	32050443	6790	0	6177	No match	5	5	24	0	4	4	0	4	4	0	179	0	1414	4	0	0	804	32030440	32049830	395	613	unchanged
ENSDARG00000011055	ENSDART00000019989	13	2206942	2220565	-1	BC045996.1	1870	1005	RNASEQT00000011142	2206942	2220629	2195	1266	1477	RNASEQG00000011142	11	11	13	13	10	9	0	10	9	0	4832	0	1870	10	1005	10	10673	2207660	2207660	718	718	trim	182	0
ENSDARG00000010596	ENSDART00000019991	7	29948955	29959574	1	BC085534.1	1503	987	0	0	0	0	0	0	0	5	5	0	0	4	4	0	4	4	0	2768	3	0	0	0	0	16230	29959194	0	380	No match
ENSDARG00000025275	ENSDART00000019992	5	25371230	25384750	-1	BC052142.1	1702	951	RNASEQT00000006507	25381852	25384846	328	99	326	RNASEQG00000006507	6	5	3	2	5	3	0	4	2	0	495	0	232	2	99	1	2905	25371850	25381854	620	2	unchanged
ENSDARG00000015978	ENSDART00000020000	10	43739896	43743649	1	BC071304.1	608	381	RNASEQT00000024345	43739840	43743651	666	381	467	RNASEQG00000024345	4	4	4	4	3	3	0	3	3	0	18726	0	608	4	381	4	36132	43743452	43743452	197	199	trim	136	0
ENSDARG00000004616	ENSDART00000020004	5	25276562	25288849	-1	BC125912.1	2534	1863	0	0	0	0	0	0	0	16	16	0	0	15	15	0	15	15	0	2332	0	0	0	0	0	4967	25277106	0	544	No match
ENSDARG00000036375	ENSDART00000020014	14	35071346	35131017	-1	EF531617.1	4023	3762	RNASEQT00000018718	34976936	35131083	6997	3759	3953	RNASEQG00000018718	29	28	30	28	28	27	1	27	26	1	3842	28	4020	27	3759	27	5826	35071479	35071479	133	3044	unchanged
ENSDARG00000013839	ENSDART00000020017	3	34205529	34214248	1	BC049338.1	1943	1422	RNASEQT00000022644	34205447	34226883	1967	1431	1628	RNASEQG00000022644	10	9	13	10	9	9	0	8	8	0	7827	6	1865	9	1418	8	8570	34213842	34213929	406	339	unchanged
ENSDARG00000009494	ENSDART00000020033	16	57735786	57772473	1	BC080268.1	2795	1854	RNASEQT00000012633	57735720	57772473	2780	1854	2032	RNASEQG00000012633	18	17	19	17	17	16	1	16	15	1	8846	439	2714	17	1854	17	19346	57771644	57771644	829	748	trim	101	0
ENSDARG00000013005	ENSDART00000020054	10	31630152	31797814	-1	BC081685.1	2031	1029	RNASEQT00000024679	31630196	31938832	1719	1008	1259	RNASEQG00000024679	7	7	8	8	6	6	0	6	6	0	221	0	1407	6	947	6	1132	31630656	31630656	504	460	unchanged
ENSDARG00000012603	ENSDART00000020082	25	32878821	32885649	-1	BC055247.1	1753	750	0	0	0	0	0	0	0	9	8	0	0	8	7	0	7	7	0	9284	2	0	0	0	0	24651	32879776	0	925	No match
ENSDARG00000056633	ENSDART00000020096	10	27352112	27373079	-1	BC065985.1	1882	582	RNASEQT00000024653	27352074	27379659	2256	603	982	RNASEQG00000024653	5	5	6	5	4	4	0	4	4	0	170	0	1787	4	551	4	2426	27353348	27353348	1236	1274	unchanged
ENSDARG00000005560	ENSDART00000020122	10	16980964	16985011	1	BC053130.1	2478	741	0	0	0	0	0	0	0	2	2	0	0	1	1	0	1	1	0	817	0	0	0	0	0	55328	16983593	0	1418	No match
ENSDARG00000013946	ENSDART00000020136	2	22837433	22849650	-1	BC045449.1	2935	1923	RNASEQT00000004380	22824472	22849848	2717	1923	2412	RNASEQG00000004380	15	13	17	13	14	14	0	12	12	0	16586	1	2504	14	1923	13	63888	22838154	22838154	721	305	unchanged
ENSDARG00000015015	ENSDART00000020137	18	27681280	27762070	1	BC076124.1	1763	741	RNASEQT00000005454	27680997	27762077	2053	777	1270	RNASEQG00000005454	9	7	9	8	8	8	0	6	6	0	1282	0	1763	9	741	6	4632	27761294	27761294	776	783	unchanged
ENSDARG00000008203	ENSDART00000020156	17	42869965	42873482	-1	BC129448.1	1603	1080	RNASEQT00000002548	42861965	42874042	2063	1065	1376	RNASEQG00000002548	4	4	8	5	3	3	0	3	3	0	203	0	1112	2	1061	3	1427	42870405	42870405	440	687	unchanged
ENSDARG00000002333	ENSDART00000020183	20	33777575	33814466	-1	BC171399.1	1328	1104	0	0	0	0	0	0	0	11	11	0	0	10	8	0	10	8	0	613	0	0	0	0	0	1480	33777645	0	70	No match
ENSDARG00000029402	ENSDART00000020187	11	37123805	37181817	-1	BC068433.1	3251	2445	0	0	0	0	0	0	0	21	20	0	0	20	18	0	19	18	0	2595	2	0	0	0	0	7286	37124509	0	704	No match
ENSDARG00000013079	ENSDART00000020192	12	9937828	9972455	1	BC054908.1	2952	2649	RNASEQT00000013346	9937814	9972455	2966	2649	2774	RNASEQG00000013346	18	17	18	17	17	17	0	16	16	0	2619	0	2952	18	2649	17	5591	9972263	9972263	192	192	trim	4	0
ENSDARG00000019484	ENSDART00000020233	18	4449572	4465983	1	BC075993.1	1480	900	RNASEQT00000004852	4449497	4465990	1562	900	1212	RNASEQG00000004852	8	6	8	6	7	7	0	5	5	0	808	0	1480	8	900	6	2324	4465640	4465640	343	350	trim	648	0
ENSDARG00000015770	ENSDART00000020234	17	31864885	31903739	-1	BC067636.1	2088	936	RNASEQT00000002484	31870583	31900484	586	546	578	RNASEQG00000002484	9	5	5	5	8	4	0	4	1	0	328	0	439	2	266	0	5258	31865733	31870591	848	8	unchanged
ENSDARG00000019307	ENSDART00000020249	22	32601002	32612547	-1	BC059592.1	1521	1107	RNASEQT00000001184	32601002	32612616	1590	1107	1270	RNASEQG00000001184	4	4	4	4	3	3	0	3	3	0	390	0	1521	4	1107	4	3366	32601322	32601322	320	320	trim	10	0
ENSDARG00000009001	ENSDART00000020252	20	31243499	31257030	1	BC044507.1	1962	1323	RNASEQT00000015466	31240943	31257030	2150	1323	1537	RNASEQG00000015466	13	13	14	13	12	12	0	12	12	0	10179	2	1962	12	1323	13	19801	31256417	31256417	613	613	trim	1104	0
ENSDARG00000007715	ENSDART00000020256	11	11384825	11388258	-1	DQ122929.1	2299	2007	0	0	0	0	0	0	0	4	4	0	0	3	2	1	3	2	1	904	217	0	0	0	0	10163	11384964	0	139	No match
ENSDARG00000013784	ENSDART00000020259	25	17238140	17298674	1	BC065675.1	2557	1656	RNASEQT00000010512	17272990	17298674	2560	1656	1860	RNASEQG00000010512	6	4	5	4	5	5	0	3	3	0	691	0	2520	4	1656	4	5295	17296130	17296130	700	700	trim	45	0
ENSDARG00000014091	ENSDART00000020270	13	32367972	32374044	1	BC083241.1	1737	795	RNASEQT00000011410	32367712	32374047	2000	795	1334	RNASEQG00000011410	3	2	3	2	2	2	0	1	1	0	287	0	1737	3	795	2	5281	32373381	32373381	663	666	trim	1030	0
ENSDARG00000012674	ENSDART00000020283	11	18483745	18494305	1	BC078405.1	1698	1077	RNASEQT00000000626	18483359	18494385	2164	1077	1601	RNASEQG00000000626	7	7	7	7	6	6	0	6	6	0	1141	0	1698	7	1077	7	3258	18493822	18493822	483	563	unchanged
ENSDARG00000004436	ENSDART00000020301	19	34623246	34639652	-1	BC078261.1	1345	891	RNASEQT00000025190	34623267	34639699	1588	546	682	RNASEQG00000025190	8	8	8	5	7	6	0	7	6	0	1190	4	1324	7	438	4	2654	34623611	34632708	365	906	trim	257	0
ENSDARG00000015128	ENSDART00000020311	3	30045086	30050345	-1	BC045965.1	482	411	RNASEQT00000021863	30045086	30050405	542	411	504	RNASEQG00000021863	5	4	5	4	4	4	0	3	3	0	324369	18	482	5	411	4	78010	30045124	30045124	38	38	trim	712	0
ENSDARG00000019038	ENSDART00000020342	3	33595195	33628264	-1	BC054597.1	3534	2268	RNASEQT00000021948	33595195	33628436	3706	2268	2621	RNASEQG00000021948	21	20	21	20	20	19	1	19	18	1	6144	169	3534	21	2268	20	7693	33596280	33596280	1085	1085	trim	479	0
ENSDARG00000020442	ENSDART00000020350	13	33869889	33879406	-1	BC075758.1	2581	1200	RNASEQT00000011437	33869889	33879468	2643	1200	1372	RNASEQG00000011437	13	13	13	13	12	12	0	12	12	0	7101	0	2581	13	1200	13	23213	33871160	33871160	1271	1271	trim	1	0
ENSDARG00000077968	ENSDART00000020363	16	31590778	31636265	-1	BC162781.1	1168	966	RNASEQT00000012947	31589810	31632160	1559	363	523	RNASEQG00000012947	4	3	2	2	3	0	0	2	0	0	0	0	215	1	147	1	908	31590846	31590846	68	1036	unchanged
ENSDARG00000020286	ENSDART00000020370	4	61887203	61893205	-1	BC129306.1	1342	795	RNASEQT00000020891	61888122	61893309	1137	771	912	RNASEQG00000020891	5	4	4	4	4	3	0	3	3	0	295	0	1033	3	771	4	3521	61888347	61888347	534	225	trim	980	0
ENSDARG00000006468	ENSDART00000020381	3	29596592	29619973	1	BC093196.1	1767	855	RNASEQT00000022574	29596583	29635805	4967	0	3872	No match	9	7	13	0	8	8	0	6	6	0	1135	0	1767	8	0	0	1457	29619294	29634710	679	1095	unchanged
ENSDARG00000018953	ENSDART00000020386	8	15786374	15794202	1	BC044532.1	1825	822	RNASEQT00000023051	15786252	15794202	1947	822	1031	RNASEQG00000023051	7	7	7	7	6	6	0	6	6	0	3118	1	1825	7	822	7	14961	15793286	15793286	916	916	trim	221	0
ENSDARG00000014859	ENSDART00000020400	20	7037980	7067282	-1	BC081574.1	3105	879	RNASEQT00000015268	7037980	7067364	3187	879	1146	RNASEQG00000015268	4	4	4	4	3	3	0	3	3	0	590	0	3105	4	879	4	7972	7040021	7040021	2041	2041	trim	354	0
ENSDARG00000008305	ENSDART00000020409	1	38602519	38604378	-1	BC083365.1	1635	618	RNASEQT00000008595	38602519	38604411	1668	618	1141	RNASEQG00000008595	2	2	2	2	1	1	0	1	1	0	187	0	1635	2	618	2	2366	38603046	38603046	527	527	trim	57	0
ENSDARG00000014098	ENSDART00000020412	1	51045922	51064109	1	AY618926.1	3332	2715	RNASEQT00000008713	51045569	51068023	7599	2715	3484	RNASEQG00000008713	14	14	14	14	13	13	0	13	13	0	1330	0	3332	14	2715	14	3769	51063908	51063908	201	4115	extend	0	3748	291
ENSDARG00000005368	ENSDART00000020425	15	22625412	22696269	-1	AY746594.1	3564	1854	RNASEQT00000017302	22625412	22696368	3702	1893	2078	RNASEQG00000017302	15	15	16	16	14	14	0	14	14	0	2784	0	3564	15	1854	15	8068	22627036	22627036	1624	1624	trim	122	0
ENSDARG00000004525	ENSDART00000020463	2	3444090	3461887	1	BC054564.1	2855	921	RNASEQT00000004218	3443815	3461093	2312	897	1457	RNASEQG00000004218	8	8	8	8	7	7	0	7	7	0	2296	1	2037	7	897	7	13522	3460238	3460238	1649	855	unchanged
ENSDARG00000018351	ENSDART00000020472	5	2798462	2835718	1	BC046075.1	1779	1164	RNASEQT00000006329	2807461	2835230	1242	951	1184	RNASEQG00000006329	14	14	13	9	13	12	0	13	12	0	1435	0	1242	12	921	8	9069	2835142	2835172	576	58	unchanged
ENSDARG00000014462	ENSDART00000020493	8	17574693	17586728	-1	BC076367.1	1245	657	RNASEQT00000023063	17574692	17586770	1288	675	850	RNASEQG00000023063	5	4	5	5	4	4	0	3	3	0	649	0	1245	5	657	3	1773	17575130	17575130	437	438	trim	568	0
ENSDARG00000015471	ENSDART00000020505	6	36792721	36826108	1	BC050498.1	4352	3081	RNASEQT00000015006	36788116	36847016	7928	3051	3299	RNASEQG00000015006	25	25	36	25	24	23	1	24	23	1	2954	210	3789	23	2987	24	7078	36824890	36824890	1218	4629	unchanged
ENSDARG00000070020	ENSDART00000020538	23	42888157	42901803	-1	AY825258.1	1556	1500	0	0	0	0	0	0	0	9	9	0	0	8	8	0	8	8	0	754	0	0	0	0	0	1706	42888184	0	27	No match
ENSDARG00000018529	ENSDART00000020541	12	18226191	18268577	-1	BC052131.1	1772	1191	RNASEQT00000013412	18226190	18268699	1895	1191	1364	RNASEQG00000013412	10	9	10	9	9	9	0	8	8	0	2800	1	1772	10	1191	9	6549	18226721	18226721	530	531	trim	1721	0
ENSDARG00000012244	ENSDART00000020550	9	44871193	44953377	1	BC067146.1	1437	630	RNASEQT00000016541	44869904	44953380	2729	630	2025	RNASEQG00000016541	6	5	6	5	5	5	0	4	4	0	6196	1	1437	6	630	5	27742	44952676	44952676	701	704	trim	262	0
ENSDARG00000014147	ENSDART00000020575	3	56617175	56636702	1	AF387812.1	3399	2439	RNASEQT00000022136	56616495	56637576	4953	2439	3347	RNASEQG00000022136	11	10	11	10	10	10	0	9	9	0	6047	3	3399	11	2439	10	13080	56635970	56635970	732	1606	trim	102	0
ENSDARG00000004261	ENSDART00000020582	14	27413742	27420920	-1	BC071412.1	1910	681	RNASEQT00000018221	27414444	27421021	1309	672	782	RNASEQG00000018221	5	5	5	5	4	4	0	4	4	0	7915	2	1208	5	672	5	59318	27414971	27414971	1229	527	trim	786	0
ENSDARG00000017602	ENSDART00000020603	21	5811399	5818596	-1	BC066368.1	1906	993	RNASEQT00000002743	5811355	5818969	2323	993	1431	RNASEQG00000002743	8	7	8	7	7	7	0	6	6	0	3355	0	1906	8	993	7	14891	5812247	5812247	848	892	trim	360	0
ENSDARG00000028657	ENSDART00000020607	25	3198518	3213457	1	BC055563.1	2416	1431	RNASEQT00000010762	3198510	3217448	3462	1431	1471	RNASEQG00000010762	11	11	12	11	10	10	0	10	10	0	10297	3	2416	10	1431	11	31301	3212504	3212504	953	1991	unchanged
ENSDARG00000014059	ENSDART00000020610	10	45496611	45498255	1	BC083368.1	1645	654	0	0	0	0	0	0	0	1	1	0	0	0	0	0	0	0	0	0	0	0	0	0	0	6594	45497363	0	892	No match
ENSDARG00000008010	ENSDART00000020616	23	30061768	30062628	-1	BC162838.1	861	783	0	0	0	0	0	0	0	1	1	0	0	0	0	0	0	0	0	0	0	0	0	0	0	284	30061790	0	22	No match
ENSDARG00000003429	ENSDART00000020631	10	5020620	5027922	-1	BC055525.1	1447	891	RNASEQT00000024026	5020620	5028367	1788	891	1473	RNASEQG00000024026	9	7	8	7	8	8	0	6	6	0	25462	0	1343	8	891	7	39612	5022115	5022115	419	315	trim	6	0
ENSDARG00000012609	ENSDART00000020637	9	33874234	33890441	-1	BC155107.1	2089	1344	RNASEQT00000016447	33874234	33880028	1598	1023	1265	RNASEQG00000016447	12	10	8	7	11	7	0	9	7	0	149	0	1586	7	1023	6	476	33874567	33874567	333	333	confirmed
ENSDARG00000003109	ENSDART00000020638	9	36896670	36917477	1	BC078255.1	1784	633	0	0	0	0	0	0	0	4	4	0	0	3	3	0	3	3	0	1278	0	0	0	0	0	11468	36916595	0	882	No match
ENSDARG00000023279	ENSDART00000020654	16	11356327	11371966	1	BC092825.1	1502	1119	RNASEQT00000012174	11356268	11371969	1564	1119	1191	RNASEQG00000012174	10	10	10	10	9	9	0	9	9	0	7422	0	1502	10	1119	10	10376	11371596	11371596	370	373	trim	69	0
ENSDARG00000002194	ENSDART00000020663	13	46116965	46143214	-1	AY613958.1	1931	1272	RNASEQT00000011536	46116962	46143262	1982	1272	1362	RNASEQG00000011536	10	10	10	10	9	9	0	9	9	0	512	0	1931	10	1272	10	904	46117582	46117582	617	620	extend	0	568	4
ENSDARG00000012981	ENSDART00000020667	12	30321759	30342925	-1	BC083531.1	3620	2667	RNASEQT00000013952	30320255	30343275	5378	2571	3056	RNASEQG00000013952	22	21	23	22	21	20	1	20	19	1	16886	817	3524	21	2571	20	42801	30322577	30322577	818	2322	unchanged
ENSDARG00000014840	ENSDART00000020671	13	2942182	2948003	1	BC155196.1	2344	1029	RNASEQT00000011145	2942092	2948003	2434	1029	1466	RNASEQG00000011145	3	3	3	3	2	2	0	2	2	0	569	2	2344	3	1029	3	14120	2947035	2947035	968	968	trim	88	0
ENSDARG00000021013	ENSDART00000020673	24	31254109	31267414	-1	EU118268.1	1331	885	RNASEQT00000019804	31251916	31267590	3700	885	1153	RNASEQG00000019804	6	6	6	6	5	5	0	5	5	0	1137	0	1331	6	885	6	5303	31254463	31254463	354	2547	extend	0	2296	70
ENSDARG00000010078	ENSDART00000020680	1	54485864	54508659	1	BC052764.1	3658	3411	RNASEQT00000008764	54485854	54508659	3668	3411	3565	RNASEQG00000008764	26	26	26	26	25	25	0	25	25	0	7600	31	3658	26	3411	26	10057	54508556	54508556	103	103	trim	19	0
ENSDARG00000005273	ENSDART00000020740	14	19668950	19714970	1	BC097146.1	3335	873	RNASEQT00000018155	19668799	19715117	3691	873	1134	RNASEQG00000018155	11	10	10	10	10	9	0	9	9	0	1364	0	3335	9	873	10	8788	19712560	19712560	2352	2557	trim	135	0
ENSDARG00000011665	ENSDART00000020741	3	39563082	39571832	1	AY394966.1	1597	1095	RNASEQT00000022014	39561613	39571832	1735	1095	1348	RNASEQG00000022014	7	6	7	6	6	6	0	5	5	0	113246	12	1489	6	1095	6	193597	39571445	39571445	387	387	trim	570	0
ENSDARG00000004727	ENSDART00000020743	9	31018318	31027441	1	BC083291.1	1049	879	RNASEQT00000016413	31018040	31027440	1326	879	1181	RNASEQG00000016413	9	9	9	9	8	8	0	8	8	0	3547	1	1048	9	879	9	2946	31027295	31027295	146	145	trim	8	0
ENSDARG00000003693	ENSDART00000020749	14	7345730	7364109	1	BC081624.1	2059	1314	RNASEQT00000018080	7345661	7364109	1820	1542	1646	RNASEQG00000018080	15	12	13	13	14	12	1	11	10	0	12917	833	1750	12	1203	8	20484	7360368	7363935	422	174	trim	649	0
ENSDARG00000018106	ENSDART00000020786	2	33726832	33789893	-1	BC052109.1	1735	1362	RNASEQT00000003951	33726832	33790093	1935	1362	1824	RNASEQG00000003951	12	11	12	11	11	11	0	10	10	0	2292	0	1735	12	1362	11	4236	33726943	33726943	111	111	trim	35	0
ENSDARG00000003757	ENSDART00000020792	2	29701097	29710877	-1	BC122425.1	1206	564	RNASEQT00000003897	29701093	29710903	1115	564	756	RNASEQG00000003897	6	5	7	5	5	5	0	4	4	0	3375	13	1085	5	564	5	7656	29701452	29701452	355	359	trim	585	0
ENSDARG00000007077	ENSDART00000020798	9	33905996	33908876	1	BC091675.1	2656	1614	RNASEQT00000016448	33889949	33908876	6354	4326	5314	RNASEQG00000016448	2	1	6	3	1	1	0	0	0	0	112	1	2656	1	1614	0	6077	33907611	33907611	1040	1040	trim	44	0
ENSDARG00000017703	ENSDART00000020808	5	40755075	40771429	-1	BC071435.1	2235	939	RNASEQT00000006012	40755081	40771484	2284	939	1213	RNASEQG00000006012	7	6	7	6	6	6	0	5	5	0	3067	0	2229	7	939	6	25963	40756152	40756152	1077	1071	trim	60	0
ENSDARG00000012513	ENSDART00000020810	23	16820083	16852904	-1	AY398413.1	1764	900	RNASEQT00000009595	16820087	16853012	1868	900	1205	RNASEQG00000009595	9	8	9	8	8	8	0	7	7	0	13251	0	1760	9	900	8	36162	16820750	16820750	667	663	trim	893	0
ENSDARG00000006005	ENSDART00000020817	10	46287511	46297891	-1	BC065992.1	1402	1035	RNASEQT00000024379	46287507	46297988	1503	1035	1224	RNASEQG00000024379	6	6	6	6	5	5	0	5	5	0	3978	0	1402	6	1035	6	12304	46287786	46287786	275	279	trim	34	0
ENSDARG00000007769	ENSDART00000020851	7	57865788	57870015	-1	BC124437.1	1941	936	RNASEQT00000008123	57866638	57870033	1144	936	1004	RNASEQG00000008123	7	6	6	6	6	5	0	5	5	0	136	0	1124	5	936	6	585	57866778	57866778	955	140	unchanged
ENSDARG00000015314	ENSDART00000020908	5	23857041	23866179	-1	AY648796.1	1667	675	RNASEQT00000005775	23857041	23871591	4407	675	3546	RNASEQG00000005775	5	5	6	5	4	4	0	4	4	0	3813	0	1637	4	675	5	27737	23857902	23857902	861	861	trim	706	0
ENSDARG00000018976	ENSDART00000020920	17	17634905	17686250	1	BC095355.1	1857	1605	RNASEQT00000001833	17634826	17690645	6331	1677	1848	RNASEQG00000001833	12	12	12	12	11	11	0	11	11	0	3131	1	1857	12	1605	12	7103	17686162	17686162	88	4483	extend	0	2370	108
ENSDARG00000016058	ENSDART00000020936	14	31583370	31593693	-1	BC054612.1	1486	1074	RNASEQT00000018254	31583368	31593817	1612	1074	1376	RNASEQG00000018254	11	10	11	10	10	10	0	9	9	0	2996	0	1486	11	1074	10	5032	31583604	31583604	234	236	trim	267	0
ENSDARG00000007885	ENSDART00000020946	13	26927838	27004681	1	BC066750.1	1913	1116	RNASEQT00000011842	26927734	27004955	2291	1116	1371	RNASEQG00000011842	14	14	14	14	13	13	0	13	13	0	1382	0	1913	14	1116	14	3690	27004035	27004035	646	920	unchanged
ENSDARG00000012818	ENSDART00000020967	7	58015011	58030228	-1	BC044342.1	2443	1047	RNASEQT00000007469	58015011	58030313	2085	1047	1556	RNASEQG00000007469	12	11	13	11	11	11	0	10	10	0	5237	0	2000	11	1047	11	13464	58015619	58015619	529	529	trim	660	0
ENSDARG00000018178	ENSDART00000020970	1	17521064	17545814	-1	BC066627.1	3436	1836	RNASEQT00000008432	17521064	17545874	3496	1836	2023	RNASEQG00000008432	13	13	13	13	12	12	0	12	12	0	1297	0	3436	13	1836	13	5943	17522537	17522537	1473	1473	extend	0	552	1
ENSDARG00000014682	ENSDART00000020995	12	8726452	8733388	-1	BC154616.1	1192	912	RNASEQT00000013788	8726415	8733542	1383	912	1122	RNASEQG00000013788	6	6	6	6	5	5	0	5	5	0	93	1	1192	6	912	6	307	8726676	8726676	224	261	unchanged
ENSDARG00000017740	ENSDART00000021035	20	32540644	32559336	1	BC076198.1	2674	2256	RNASEQT00000015476	32540274	32560853	4561	2256	2708	RNASEQG00000015476	20	20	20	20	19	19	0	19	19	0	7071	2	2674	20	2256	20	16047	32559000	32559000	336	1853	trim	2	0
ENSDARG00000004754	ENSDART00000021037	21	41543121	41577027	-1	BC051152.1	3217	2502	RNASEQT00000003556	41542829	41577151	3633	2502	2810	RNASEQG00000003556	19	19	19	19	18	18	0	18	18	0	10886	2	3217	19	2502	19	22331	41543652	41543652	531	823	unchanged
ENSDARG00000010432	ENSDART00000021060	9	24036553	24041284	1	BC071305.1	1953	780	RNASEQT00000016319	24036511	24041284	1995	780	927	RNASEQG00000016319	6	6	6	6	5	5	0	5	5	0	2356	0	1953	6	780	6	19619	24040216	24040216	1068	1068	trim	205	0
ENSDARG00000016059	ENSDART00000021065	9	28784139	28796884	1	BC066634.1	2322	645	RNASEQT00000016851	28784054	28824745	1664	645	882	RNASEQG00000016851	6	5	6	5	5	4	0	4	3	0	1097	0	684	5	532	4	4345	28795359	28823963	1525	782	unchanged
ENSDARG00000006413	ENSDART00000021069	12	40099762	40104567	1	BC076322.1	304	213	RNASEQT00000013613	40099735	40104567	331	213	290	RNASEQG00000013613	5	4	5	4	4	4	0	3	3	0	202002	11	304	5	213	4	33017	40104526	40104526	41	41	trim	623	0
ENSDARG00000016977	ENSDART00000021092	16	25734945	25763660	1	BC063999.1	2081	1710	RNASEQT00000012885	25734790	25766985	5561	1710	1923	RNASEQG00000012885	13	13	13	13	12	12	0	12	12	0	3592	0	2081	13	1710	13	6069	25763347	25763347	313	3638	unchanged
ENSDARG00000012552	ENSDART00000021095	24	26431769	26445940	1	BC108025.1	3137	2316	RNASEQT00000019759	26431708	26446963	4221	2316	2534	RNASEQG00000019759	18	17	18	17	17	17	0	16	16	0	8191	0	3137	18	2316	17	12885	26445276	26445276	664	1687	trim	236	0
ENSDARG00000006896	ENSDART00000021100	10	9463187	9485705	1	AY664403.1	3278	1128	RNASEQT00000024504	9463014	9485704	3450	1128	1601	RNASEQG00000024504	9	9	9	9	8	8	0	8	8	0	206	0	3277	9	1128	9	1497	9483855	9483855	1850	1849	unchanged
ENSDARG00000014311	ENSDART00000021120	25	5202451	5227203	1	BC125951.1	2422	1968	RNASEQT00000010783	5202410	5245044	4475	2091	2209	RNASEQG00000010783	14	13	22	13	13	13	0	12	12	0	1416	0	2422	12	1968	13	3760	5226946	5226946	257	2266	unchanged
ENSDARG00000009657	ENSDART00000021139	4	1581954	1589973	1	BC053266.1	1484	648	RNASEQT00000020569	1581765	1589973	1673	648	868	RNASEQG00000020569	6	5	6	5	5	5	0	4	4	0	1469	1	1484	6	648	5	7766	1589168	1589168	805	805	trim	169	0
ENSDARG00000008807	ENSDART00000021141	2	22098104	22108068	1	BC053218.1	1253	636	RNASEQT00000004370	22097704	22108314	1899	645	1151	RNASEQG00000004370	4	4	4	4	3	3	0	3	3	0	1792	0	1253	4	636	4	11032	22107566	22107566	502	748	unchanged
ENSDARG00000015856	ENSDART00000021145	16	45968698	45981705	-1	BC076052.1	1901	1062	RNASEQT00000012544	45968691	45981791	1994	1062	1391	RNASEQG00000012544	11	10	11	10	10	9	1	9	9	0	1651	127	1901	11	1062	10	4727	45969294	45969294	596	603	trim	133	0
ENSDARG00000019526	ENSDART00000021158	2	16280983	16299873	1	BC056733.1	2260	1341	RNASEQT00000003759	16280798	16299871	2443	1398	1651	RNASEQG00000003759	12	12	12	12	11	11	0	11	11	0	1509	0	2258	12	1341	12	5025	16299079	16299079	794	792	trim	140	0
ENSDARG00000005593	ENSDART00000021168	2	20495131	20546256	1	BC059576.1	1835	1320	RNASEQT00000003789	20495087	20546256	1884	1047	1159	RNASEQG00000003789	11	11	10	8	10	9	0	10	9	0	462	0	1835	9	1042	7	1220	20545809	20539901	447	725	trim	125	0
ENSDARG00000071037	ENSDART00000021177	17	23754953	23763602	1	BC057464.1	2888	1251	RNASEQT00000001896	23754953	23763601	2887	1251	1387	RNASEQG00000001896	4	4	4	4	3	3	0	3	3	0	487	0	2887	4	1251	4	9090	23762101	23762101	1501	1500	trim	123	0
ENSDARG00000015325	ENSDART00000021191	9	9451855	9464129	-1	BC098601.1	947	753	RNASEQT00000016144	9451859	9464234	1048	753	886	RNASEQG00000016144	8	8	8	8	7	7	0	7	7	0	13536	0	943	8	753	8	10693	9452021	9452021	166	162	trim	705	0
ENSDARG00000053561	ENSDART00000021194	4	60617722	60630472	1	BC093168.1	929	759	RNASEQT00000020886	60617576	60731229	1195	753	964	RNASEQG00000020886	7	6	7	6	6	6	0	5	5	0	1751	0	359	3	294	2	4577	60630367	60730998	105	231	trim	82	0
ENSDARG00000013423	ENSDART00000021201	6	21473797	21478510	1	BC053152.1	1594	1260	RNASEQT00000014907	21426392	21478664	1705	867	917	RNASEQG00000014907	13	12	12	8	12	10	1	11	9	1	1181	2	987	6	414	3	950	21478342	21477534	168	788	unchanged
ENSDARG00000019339	ENSDART00000021209	8	9243918	9249261	1	BC081425.1	858	468	RNASEQT00000022984	9243050	9249261	1726	468	1554	RNASEQG00000022984	6	6	6	6	5	5	0	5	5	0	1353	0	858	6	468	6	1588	9249089	9249089	172	172	trim	28	0
ENSDARG00000020764	ENSDART00000021231	23	19878722	19892955	1	BC045462.1	1897	1131	RNASEQT00000009625	19878360	19892819	2123	1131	1541	RNASEQG00000009625	9	8	9	8	8	8	0	7	7	0	4357	3	1761	9	1131	8	18779	19892237	19892237	718	582	trim	781	0
ENSDARG00000014329	ENSDART00000021240	10	22234704	22245326	1	BC053240.1	1595	840	RNASEQT00000024174	22234620	22245326	1679	840	1057	RNASEQG00000024174	11	11	11	11	10	9	1	10	9	1	62622	2963	1595	11	840	11	134221	22244704	22244704	622	622	trim	117	0
ENSDARG00000014233	ENSDART00000021260	14	51300183	51322651	-1	BC115182.1	1425	1272	RNASEQT00000018841	51299676	51322716	1997	1272	1343	RNASEQG00000018841	10	10	10	10	9	9	0	9	9	0	604	0	1425	10	1272	10	866	51300330	51300330	147	654	unchanged
ENSDARG00000002168	ENSDART00000021266	9	12855310	12870974	-1	BC049051.1	1294	837	RNASEQT00000016192	12855311	12871023	1342	837	1010	RNASEQG00000016192	8	8	8	8	7	7	0	7	7	0	7450	2	1293	8	837	8	14794	12855643	12855643	333	332	trim	988	0
ENSDARG00000009851	ENSDART00000021272	21	7545668	7569956	1	BC098539.1	2001	849	RNASEQT00000002765	7545615	7569956	2113	1350	1819	RNASEQG00000002765	14	11	13	13	13	12	0	10	9	0	2999	6	2001	12	849	8	5108	7557368	7569662	736	294	trim	520	0
ENSDARG00000008835	ENSDART00000021286	3	3966410	3970865	-1	BC152015.1	1921	1890	0	0	0	0	0	0	0	17	17	0	0	16	16	0	16	16	0	28371	83	0	0	0	0	30765	3966441	0	31	No match
ENSDARG00000005246	ENSDART00000021298	12	25571087	25587244	1	BC045958.1	1800	1560	RNASEQT00000013474	25569521	25587244	3366	1560	3289	RNASEQG00000013474	9	9	9	9	8	8	0	8	8	0	1282	0	1800	9	1560	9	5002	25587167	25587167	77	77	trim	1593	0
ENSDARG00000015676	ENSDART00000021299	15	1648991	1667666	1	BC090467.1	1919	1518	RNASEQT00000017566	1648989	1668061	2316	1518	1630	RNASEQG00000017566	16	15	16	15	15	15	0	14	14	0	6174	0	1919	16	1518	15	8008	1667375	1667375	291	686	unchanged
ENSDARG00000038870	ENSDART00000021319	14	48939110	48953164	1	BC085570.1	1850	1716	RNASEQT00000018820	48945628	48953966	1814	1017	1078	RNASEQG00000018820	16	15	10	9	15	13	0	14	12	0	8516	0	1124	7	1017	8	12467	48953108	48953108	56	736	unchanged
ENSDARG00000030972	ENSDART00000021336	1	45458476	45469909	1	BC044445.1	2240	1197	RNASEQT00000008661	45458387	45469616	2036	1197	1400	RNASEQG00000008661	9	8	9	8	8	8	0	7	7	0	2504	0	1947	9	1197	8	10601	45468980	45468980	929	636	trim	925	0
ENSDARG00000013438	ENSDART00000021340	25	20068121	20075059	-1	BC115343.1	1196	723	RNASEQT00000010927	20068177	20075138	1219	723	1065	RNASEQG00000010927	9	8	9	8	8	8	0	7	7	0	57	0	1140	9	723	8	117	20068331	20068331	210	154	unchanged
ENSDARG00000002720	ENSDART00000021370	18	6123286	6142658	-1	BC045308.1	1853	1554	RNASEQT00000004881	6123286	6142697	1974	1554	1764	RNASEQG00000004881	13	12	13	12	12	12	0	11	11	0	4711	0	1853	12	1554	12	9182	6123496	6123496	210	210	trim	634	0
ENSDARG00000003420	ENSDART00000021372	18	38783548	38806056	-1	BC092962.1	1711	1401	RNASEQT00000005512	38783448	38806315	2070	1401	1767	RNASEQG00000005512	9	8	9	8	8	8	0	7	7	0	345	0	1711	9	1401	8	984	38783751	38783751	203	303	unchanged
ENSDARG00000004311	ENSDART00000021396	19	29820581	29846534	1	BC045926.1	1453	864	RNASEQT00000025134	29820476	29846534	1558	864	1058	RNASEQG00000025134	9	9	9	9	8	8	0	8	8	0	2924	2	1453	9	864	9	7735	29846034	29846034	500	500	trim	12	0
ENSDARG00000015422	ENSDART00000021406	6	40578657	40582808	-1	BC105964.1	690	501	RNASEQT00000015048	40578584	40588556	919	501	768	RNASEQG00000015048	4	4	5	4	3	3	0	3	3	0	2503	1	581	3	501	4	6098	40578735	40578735	78	151	unchanged
ENSDARG00000010477	ENSDART00000021417	14	22947526	22962979	-1	AF238292.1	1710	1233	RNASEQT00000018179	22946586	22963018	2153	1233	1353	RNASEQG00000018179	12	12	13	12	11	11	0	11	11	0	420	0	1710	11	1233	12	866	22947922	22947922	396	800	trim	1394	0
ENSDARG00000054099	ENSDART00000021434	16	39388642	39399944	-1	BC171607.1	1825	1770	RNASEQT00000012472	39234950	39389168	3001	0	2232	No match	17	16	5	0	16	6	0	15	6	0	614	0	343	0	0	0	2873	39388664	39235719	22	769	trim	43	0
ENSDARG00000016867	ENSDART00000021462	5	25346368	25365809	-1	BC067341.1	1916	1170	RNASEQT00000005805	25346368	25365954	2061	1170	1422	RNASEQG00000005805	7	7	7	7	6	6	0	6	6	0	7604	5	1916	7	1170	7	35264	25347007	25347007	639	639	trim	329	0
ENSDARG00000006125	ENSDART00000021491	12	34815412	34831694	1	BC097045.1	3080	1230	RNASEQT00000013571	34618819	34831694	3356	1230	1911	RNASEQG00000013571	10	9	12	9	9	9	0	8	8	0	13609	2	3080	9	1230	9	72085	34827903	34827903	1445	1445	trim	127	0
ENSDARG00000013379	ENSDART00000021497	25	10814053	10841054	-1	BC045920.1	1751	1191	RNASEQT00000010463	10813384	10981914	10658	0	5007	No match	12	10	51	0	11	10	0	9	8	0	4868	0	1662	9	0	0	13767	10814297	10858154	244	5651	trim	163	0
ENSDARG00000006754	ENSDART00000021502	7	19994261	20096062	-1	BC092798.1	2518	1668	RNASEQT00000007069	19994550	20091906	2367	1764	1964	RNASEQG00000007069	13	12	13	13	12	12	0	11	11	0	1919	0	2155	12	1668	11	3787	19994953	19994953	692	403	trim	233	0
ENSDARG00000015803	ENSDART00000021504	1	7610782	7616127	1	AY576998.1	3655	2958	0	0	0	0	0	0	0	2	2	0	0	1	1	0	1	1	0	23	0	0	0	0	0	7558	7615727	0	400	No match
ENSDARG00000016084	ENSDART00000021510	2	39288272	39354275	-1	BC134936.1	1720	768	RNASEQT00000004009	39288274	39463309	2482	0	1352	No match	2	2	8	0	1	1	0	1	1	0	275	0	1076	1	0	0	8684	39289222	39438839	950	1130	trim	23	0
ENSDARG00000008660	ENSDART00000021559	7	19832691	19870773	-1	BC152501.1	4478	1500	RNASEQT00000007066	19832686	19870900	4610	1500	2030	RNASEQG00000007066	11	10	11	10	10	10	0	9	9	0	1396	1	4478	11	1500	10	9505	19835266	19835266	2575	2580	extend	0	1646	4
ENSDARG00000017314	ENSDART00000021594	22	7477400	7482127	1	BC078376.1	912	801	RNASEQT00000000968	7477326	7482127	986	801	883	RNASEQG00000000968	8	8	8	8	7	7	0	7	7	0	11435	1	912	8	801	8	48687	7482024	7482024	103	103	trim	14	0
ENSDARG00000002006	ENSDART00000021596	16	20493294	20526536	1	U29941.1	1503	1269	RNASEQT00000012263	20493045	20528393	3609	1269	1614	RNASEQG00000012263	11	10	11	10	10	10	0	9	9	0	1886	0	1503	11	1269	10	3836	20526398	20526398	138	1995	trim	2	0
ENSDARG00000003867	ENSDART00000021607	8	8031573	8040833	-1	BC086697.1	1482	786	RNASEQT00000023516	8031605	8040970	1587	1035	1395	RNASEQG00000023516	8	6	8	8	7	7	0	5	5	0	321	0	1450	8	786	5	765	8031797	8031797	224	192	unchanged
ENSDARG00000007175	ENSDART00000021610	4	16592514	16605802	1	BC100012.1	2316	1920	RNASEQT00000020752	16592463	16606451	2874	1920	2147	RNASEQG00000020752	16	14	17	14	15	14	1	13	12	1	1956	189	2174	15	1920	14	3779	16604426	16604426	78	727	trim	410	0
ENSDARG00000006580	ENSDART00000021620	21	25157480	25158258	1	BC078260.1	779	627	0	0	0	0	0	0	0	1	1	0	0	0	0	0	0	0	0	0	0	0	0	0	0	163913	25158138	0	120	No match
ENSDARG00000004160	ENSDART00000021628	12	9576940	9636387	1	BC045373.1	1794	771	RNASEQT00000013342	9576902	9636391	1836	771	1075	RNASEQG00000013342	8	8	8	8	7	6	1	7	6	1	5553	1055	1794	8	771	8	22166	9635630	9635630	757	761	trim	63	0
ENSDARG00000012256	ENSDART00000021644	18	49717090	49724591	1	BC061957.1	3288	1014	RNASEQT00000005209	49716925	49722663	1525	1014	1194	RNASEQG00000005209	8	8	8	8	7	6	1	7	6	1	7580	1747	1360	8	1014	8	24599	49722332	49722332	2259	331	trim	380	0
ENSDARG00000021408	ENSDART00000021645	21	34007230	34021092	1	BC142839.1	2545	1557	RNASEQT00000003026	34007223	34021092	2552	1557	1784	RNASEQG00000003026	8	8	8	8	7	7	0	7	7	0	1319	0	2545	8	1557	8	7071	34020324	34020324	768	768	trim	7	0
ENSDARG00000071669	ENSDART00000021657	14	23501863	23526763	1	BC081479.1	1447	903	RNASEQT00000018187	23501679	23526763	1631	1362	1450	RNASEQG00000018187	13	10	13	13	12	12	0	9	9	0	2388	0	1447	13	903	9	3955	23526582	23526582	181	181	trim	1533	0
ENSDARG00000009544	ENSDART00000021664	21	25145795	25146897	1	AF359426.1	1103	648	0	0	0	0	0	0	0	1	1	0	0	0	0	0	0	0	0	0	0	0	0	0	0	45415	25146485	0	412	No match
ENSDARG00000002215	ENSDART00000021666	22	16497258	16506141	-1	AY398409.1	2153	1092	RNASEQT00000001069	16497620	16506184	1834	1092	1453	RNASEQG00000001069	11	11	11	11	10	10	0	10	10	0	9125	1	1791	11	1092	11	26330	16498001	16498001	743	381	trim	370	0
ENSDARG00000007485	ENSDART00000021672	9	26381173	26399820	-1	BC048890.1	2836	2256	RNASEQT00000016372	26381160	26400516	3545	2256	3151	RNASEQG00000016371	14	14	14	14	13	12	1	13	12	1	6311	630	2836	14	2256	14	17452	26381554	26381554	381	394	trim	518	0
ENSDARG00000017312	ENSDART00000021682	21	21352833	21374745	1	BC063324.1	3873	2115	RNASEQT00000002887	21352752	21374743	3952	2115	2280	RNASEQG00000002887	18	17	18	17	17	17	0	16	16	0	2786	1	3871	18	2115	17	7807	21373071	21373071	1674	1672	trim	5	0
ENSDARG00000034056	ENSDART00000021683	8	21033954	21097133	1	BC152090.1	2130	1233	RNASEQT00000023107	21033895	21097972	3028	1233	1982	RNASEQG00000023107	11	10	11	10	10	10	0	9	9	0	5080	0	2130	11	1233	10	10334	21096926	21096926	207	1046	trim	1683	0
ENSDARG00000002217	ENSDART00000021736	14	51193732	51198999	-1	BC083300.1	1102	231	RNASEQT00000018838	51193999	51199100	936	243	494	RNASEQG00000018838	4	3	4	3	3	3	0	2	2	0	915	0	835	4	231	3	4235	51194441	51194441	709	442	unchanged
ENSDARG00000009607	ENSDART00000021753	4	5637735	5648716	-1	AY450302.1	2928	852	RNASEQT00000020992	5638742	5648783	1988	852	1009	RNASEQG00000020992	12	12	12	12	11	11	0	11	11	0	3671	1	1921	12	852	12	19857	5639721	5639721	1986	979	unchanged
ENSDARG00000016613	ENSDART00000021782	4	17914816	17919566	-1	BC133958.1	1389	1095	0	0	0	0	0	0	0	4	4	0	0	3	3	0	3	3	0	204	0	0	0	0	0	868	17914861	0	45	No match
ENSDARG00000014310	ENSDART00000021786	Zv9_scaffold3539	43802	46956	-1	BC076341.1	1059	546	RNASEQT00000018934	43800	47322	1427	546	986	RNASEQG00000018934	6	6	6	6	5	5	0	5	5	0	3462	0	1059	6	546	6	10807	44241	44241	439	441	trim	1211	0
ENSDARG00000007221	ENSDART00000021788	20	39384439	39392704	-1	BC075869.1	1690	1020	RNASEQT00000015555	39384439	39392788	1774	1020	1160	RNASEQG00000015555	8	7	8	7	7	7	0	6	6	0	2010	0	1690	8	1020	7	4982	39385053	39385053	614	614	trim	1989	0
ENSDARG00000017299	ENSDART00000021798	19	33411582	33414040	1	AY628221.2	673	405	RNASEQT00000025174	33411571	33414040	684	405	480	RNASEQG00000025174	4	4	4	4	3	3	0	3	3	0	14319	0	673	4	405	4	21249	33413836	33413836	204	204	trim	235	0
ENSDARG00000013489	ENSDART00000021814	15	6532407	6546523	-1	BC109456.1	1484	1374	RNASEQT00000017177	6532404	6546538	1502	1374	1412	RNASEQG00000017177	12	12	12	12	11	11	0	11	11	0	21549	7	1484	12	1374	12	28133	6532494	6532494	87	90	trim	73	0
ENSDARG00000005098	ENSDART00000021856	21	19138094	19150671	-1	BC155259.1	2077	1740	RNASEQT00000002861	19138094	19151005	2411	1743	2187	RNASEQG00000002861	14	14	14	14	13	13	0	13	13	0	8324	0	2077	14	1740	14	12588	19138318	19138318	224	224	trim	3	0
ENSDARG00000017340	ENSDART00000021916	11	41500356	41506286	-1	AY253851.1	564	378	0	0	0	0	0	0	0	4	4	0	0	3	1	0	3	1	0	3	0	0	0	0	0	68	41500523	0	167	No match
ENSDARG00000031651	ENSDART00000021925	13	47172771	47219919	1	BC096920.1	1881	1323	RNASEQT00000011542	47172673	47223280	3352	1323	1531	RNASEQG00000011542	13	12	14	12	12	12	0	11	11	0	3821	1	1881	12	1323	12	8171	47219471	47219471	448	1821	trim	92	0
ENSDARG00000017272	ENSDART00000021942	17	9816405	9827311	-1	BC056728.1	1321	924	RNASEQT00000002283	9816215	9827486	1686	924	1174	RNASEQG00000002283	6	6	6	6	5	5	0	5	5	0	2149	0	1321	6	924	6	10101	9816727	9816727	322	512	unchanged
ENSDARG00000040492	ENSDART00000021950	17	49510289	49563000	-1	BC075779.1	3097	2805	RNASEQT00000002095	49510290	49563295	3391	2805	3178	RNASEQG00000002095	28	27	28	27	27	27	0	26	26	0	19154	2	3096	28	2805	27	20843	49510609	49510609	214	213	trim	229	0
ENSDARG00000013240	ENSDART00000021969	6	40815480	40830482	-1	BC155640.1	2376	2202	RNASEQT00000015057	40815640	40853835	6640	0	4024	No match	18	17	48	0	17	16	0	16	16	0	871	0	2172	15	0	0	1313	40815674	40835525	156	2616	unchanged
ENSDARG00000007708	ENSDART00000021976	21	4041165	4047752	-1	BC046083.1	1127	783	RNASEQT00000002725	4041165	4047785	1160	783	956	RNASEQG00000002725	6	6	6	6	5	5	0	5	5	0	23200	2	1127	6	783	6	47755	4041369	4041369	204	204	trim	63	0
ENSDARG00000074485	ENSDART00000021985	7	14409483	14499823	1	BC139890.1	3319	1470	RNASEQT00000007766	14409447	14486732	1110	936	1110	RNASEQG00000007766	15	15	10	10	14	7	0	14	7	0	306	0	777	6	639	6	2683	14498112	14486732	1711	0	unchanged
ENSDARG00000014479	ENSDART00000021987	2	29425602	29426902	1	BC093269.1	1194	798	RNASEQT00000004435	29425612	29426902	1184	798	875	RNASEQG00000004435	2	2	2	2	1	1	0	1	1	0	45	0	1184	2	798	2	451	29426593	29426593	309	309	unchanged
ENSDARG00000014292	ENSDART00000021997	21	17744431	17761653	-1	BC045472.1	2644	2409	0	0	0	0	0	0	0	18	18	0	0	17	17	0	17	17	0	6520	3	0	0	0	0	11958	17744597	0	166	No match
ENSDARG00000015823	ENSDART00000022015	15	18225177	18231531	1	BC046056.1	2135	996	0	0	0	0	0	0	0	6	6	0	0	5	5	0	5	5	0	2190	1	0	0	0	0	12364	18230670	0	861	No match
ENSDARG00000005775	ENSDART00000022042	23	27492271	27586062	-1	AF297658.1	6806	5850	RNASEQT00000009717	27489326	27555758	9174	5364	5558	RNASEQG00000009717	27	26	25	24	26	24	1	25	23	1	2137	114	6126	23	5272	22	11495	27492942	27492942	671	3616	trim	36	0
ENSDARG00000006008	ENSDART00000022044	9	55311304	55336341	1	BC129260.1	1867	1542	RNASEQT00000016584	55310992	55336253	2091	1542	1967	RNASEQG00000016584	8	8	8	8	7	7	0	7	7	0	2145	0	1779	8	1542	8	5583	55336129	55336129	212	124	trim	3999	0
ENSDARG00000007823	ENSDART00000022060	20	37819286	37825344	1	BC045371.1	2655	609	RNASEQT00000015532	37819241	37825344	2700	609	753	RNASEQG00000015532	4	3	4	3	3	3	0	2	2	0	388	1	2655	4	609	3	5019	37823397	37823397	1947	1947	trim	2	0
ENSDARG00000019260	ENSDART00000022074	9	49753358	49783501	-1	BC059614.1	1144	960	RNASEQT00000016568	49753358	49783707	1350	960	1255	RNASEQG00000016568	5	4	5	4	4	4	0	3	3	0	916	0	1144	5	960	4	4557	49753453	49753453	95	95	trim	10	0
ENSDARG00000011797	ENSDART00000022076	19	14006044	14020444	1	BC134847.1	2965	1182	RNASEQT00000025004	14005964	14020466	3067	1182	1478	RNASEQG00000025004	2	2	2	2	1	1	0	1	1	0	28	0	2965	2	1182	2	4513	14018877	14018877	1567	1589	extend	0	1169	0
ENSDARG00000015849	ENSDART00000022112	2	23132627	23135961	-1	BC049054.1	1199	519	0	0	0	0	0	0	0	3	3	0	0	2	2	0	2	2	0	319	0	0	0	0	0	2483	23133221	0	594	No match
ENSDARG00000016594	ENSDART00000022132	5	1813138	1834555	1	BC076145.1	1288	1104	RNASEQT00000005638	1813053	1834555	1373	1104	1305	RNASEQG00000005638	10	9	10	9	9	9	0	8	8	0	1499	0	1288	10	1104	9	2220	1834487	1834487	68	68	trim	68	0
ENSDARG00000018130	ENSDART00000022135	3	26698091	26746126	-1	BC068190.1	3064	1860	RNASEQT00000022545	26690941	26729260	2867	0	2512	No match	19	19	11	0	18	10	1	18	10	1	2741	12	1220	0	0	0	15818	26698990	26691296	899	355	unchanged
ENSDARG00000090428	ENSDART00000022139	7	36522716	36524475	1	BC116546.1	857	792	RNASEQT00000007290	36522708	36533246	1440	1380	1399	RNASEQG00000007290	7	7	13	13	6	6	0	6	6	0	2485	1	651	6	640	6	11864	36524421	36533205	54	41	trim	341	0
ENSDARG00000014915	ENSDART00000022147	3	35621276	35626642	-1	BC059674.1	643	447	RNASEQT00000022651	35620112	35626703	1868	462	510	RNASEQG00000022651	5	4	5	4	4	4	0	3	3	0	19090	1980	643	5	447	4	8744	35621576	35621576	194	1358	unchanged
ENSDARG00000003818	ENSDART00000022179	6	1975300	1991511	-1	BC059181.1	3404	993	RNASEQT00000014218	1975300	1991605	3498	993	1215	RNASEQG00000014218	13	13	13	13	12	12	0	12	12	0	3505	2	3404	13	993	13	10753	1977583	1977583	2283	2283	trim	684	0
ENSDARG00000005510	ENSDART00000022193	19	23485443	23489039	1	BC163367.1	1504	1239	0	0	0	0	0	0	0	2	2	0	0	1	0	0	1	0	0	0	0	0	0	0	0	142	23488970	0	69	No match
ENSDARG00000016022	ENSDART00000022204	9	32307421	32311356	-1	AY326458.1	2582	1494	RNASEQT00000016428	32307401	32311434	2680	1494	1710	RNASEQG00000016428	2	2	2	2	1	1	0	1	1	0	189	1	2582	2	1494	2	4744	32308371	32308371	950	970	trim	212	0
ENSDARG00000020417	ENSDART00000022236	14	27374507	27386142	-1	BC092925.1	1115	702	RNASEQT00000018660	27373929	27386216	1767	702	1149	RNASEQG00000018660	3	3	3	3	2	2	0	2	2	0	122	0	1115	3	702	3	865	27374547	27374547	40	618	unchanged
ENSDARG00000013719	ENSDART00000022279	25	20084394	20098452	-1	BC095371.1	2559	2187	RNASEQT00000010929	20084330	20098526	2697	2187	2392	RNASEQG00000010929	12	11	12	11	11	11	0	10	10	0	2028	0	2559	12	2187	11	9557	20084635	20084635	241	305	unchanged
ENSDARG00000018593	ENSDART00000022325	25	32846311	32860607	1	BC067335.1	1650	987	RNASEQT00000010643	32846278	32860610	1686	987	1063	RNASEQG00000010643	7	6	7	6	6	6	0	5	5	0	1198	0	1650	7	987	6	4673	32859987	32859987	620	623	trim	34	0
ENSDARG00000007430	ENSDART00000022348	5	66656224	66660563	1	BC085382.1	1917	1101	RNASEQT00000006192	66656231	66660566	1913	1101	1238	RNASEQG00000006192	5	5	5	5	4	4	0	4	4	0	695	0	1910	5	1101	5	2841	66659891	66659891	672	675	trim	12	0
ENSDARG00000009740	ENSDART00000022356	2	16517108	16528856	1	BC108074.1	2281	1038	RNASEQT00000003764	16517060	16528856	2329	1038	1105	RNASEQG00000003764	10	10	10	10	9	9	0	9	9	0	11010	3	2281	10	1038	10	54269	16527632	16527632	1224	1224	trim	35	0
ENSDARG00000015889	ENSDART00000022358	9	11941186	11952717	-1	BC044451.1	2216	1302	RNASEQT00000016181	11941186	11952798	2297	1302	1490	RNASEQG00000016181	10	10	10	10	9	9	0	9	9	0	10987	4	2216	10	1302	10	32406	11941993	11941993	807	807	trim	416	0
ENSDARG00000018004	ENSDART00000022377	14	25240905	25243698	1	U66572.1	1657	945	RNASEQT00000018650	25240590	25243856	2130	945	1358	RNASEQG00000018650	2	2	2	2	1	1	0	1	1	0	1	0	1657	2	945	2	504	25243084	25243084	614	772	unchanged
ENSDARG00000003607	ENSDART00000022379	2	23477766	23489779	-1	BC065330.1	2848	1209	RNASEQT00000003837	23477766	23489889	2958	1209	1708	RNASEQG00000003837	5	4	5	4	4	4	0	3	3	0	1278	0	2848	5	1209	4	16963	23479016	23479016	1250	1250	trim	2071	0
ENSDARG00000007396	ENSDART00000022392	9	24059669	24067095	-1	BC076009.1	1311	675	RNASEQT00000016323	24059669	24067244	1460	675	998	RNASEQG00000016323	5	5	5	5	4	4	0	4	4	0	940	0	1311	5	675	5	4424	24060131	24060131	462	462	trim	1690	0
ENSDARG00000011931	ENSDART00000022397	22	16243897	16259997	1	BC085447.1	1486	867	RNASEQT00000001465	16243838	16337466	2497	867	1097	RNASEQG00000001465	7	7	7	7	6	5	0	6	5	0	479	0	661	4	490	4	3640	16259549	16336066	448	1400	unchanged
ENSDARG00000018109	ENSDART00000022410	3	56267042	56270027	-1	BC163157.1	543	489	RNASEQT00000022820	56266740	56283738	1430	639	1107	RNASEQG00000022820	2	2	3	3	1	1	0	1	1	0	35	0	543	1	489	1	207	56267063	56267063	21	323	unchanged
ENSDARG00000086393	ENSDART00000022441	7	17799842	17803249	-1	BC095020.1	1427	945	RNASEQT00000007800	17797666	17803304	1596	945	1097	RNASEQG00000007800	4	4	5	4	3	3	0	3	3	0	379	0	1419	3	945	4	1618	17800227	17800227	385	499	unchanged
ENSDARG00000005749	ENSDART00000022445	22	33734711	33749015	-1	BC155643.1	3874	3696	RNASEQT00000001188	33646574	33749062	7964	3696	3821	RNASEQG00000001188	15	15	30	15	14	14	0	14	14	0	1743	0	3784	14	3696	15	5771	33734811	33734811	100	4143	extend	0	2111	82
ENSDARG00000017571	ENSDART00000022481	5	45427428	45438089	-1	BC067577.1	1873	1701	RNASEQT00000006053	45427422	45438335	2125	1701	2015	RNASEQG00000006053	17	17	17	17	16	16	0	16	16	0	16448	1	1873	17	1701	17	18013	45427532	45427532	104	110	trim	1889	0
ENSDARG00000015917	ENSDART00000022484	10	28842078	28850939	1	BC066378.1	2141	1260	0	0	0	0	0	0	0	9	9	0	0	8	8	0	8	8	0	2046	2	0	0	0	0	7171	28850175	0	764	No match
ENSDARG00000006939	ENSDART00000022492	5	43899187	43915914	1	U80951.1	2846	1422	RNASEQT00000006045	43899166	43915914	2867	1467	1484	RNASEQG00000006045	9	9	9	9	8	8	0	8	8	0	192	0	2846	9	1422	9	2952	43914531	43914531	1383	1383	extend	0	521	31
ENSDARG00000010953	ENSDART00000022495	12	28038878	28058393	1	BC055587.1	2022	1035	RNASEQT00000013499	28038868	28058393	2032	1035	1152	RNASEQG00000013499	9	8	9	8	8	8	0	7	7	0	1882	0	2022	9	1035	8	4612	28057513	28057513	880	880	trim	83	0
ENSDARG00000013938	ENSDART00000022499	6	16395907	16411277	-1	BC049010.1	856	618	RNASEQT00000014355	16395904	16411312	894	618	786	RNASEQG00000014355	6	6	6	6	5	5	0	5	5	0	13231	1	856	6	618	6	13618	16396012	16396012	105	108	trim	1564	0
ENSDARG00000018650	ENSDART00000022526	11	6044739	6072314	1	BC095801.1	1657	1503	RNASEQT00000000089	6044546	6072318	1854	1503	1810	RNASEQG00000000089	9	9	9	9	8	8	0	8	8	0	693	0	1657	9	1503	9	2280	6072274	6072274	40	44	trim	45	0
ENSDARG00000019861	ENSDART00000022539	4	19114394	19117654	-1	BC117627.1	2514	1356	RNASEQT00000021158	19115211	19117762	1805	1356	1497	RNASEQG00000021158	2	2	2	2	1	1	0	1	1	0	293	0	1697	2	1356	2	8573	19115519	19115519	1125	308	unchanged
ENSDARG00000036774	ENSDART00000022546	1	41582558	41668886	-1	AY427669.1	5981	4623	RNASEQT00000009178	41583382	41671669	5345	4572	4986	RNASEQG00000009178	18	18	19	17	17	14	1	17	14	1	2214	261	5074	16	4572	17	6491	41583741	41583741	1183	359	unchanged
ENSDARG00000005318	ENSDART00000022574	9	39095646	39117453	1	BC085566.1	2959	1011	RNASEQT00000016495	39095618	39117453	2987	1530	1683	RNASEQG00000016495	14	11	14	14	13	13	0	10	10	0	5107	0	2959	14	1011	10	17783	39113623	39116149	1823	1304	trim	6	0
ENSDARG00000017708	ENSDART00000022586	6	29827558	29836032	1	BC055223.1	1887	1806	RNASEQT00000014966	29827506	29856789	1957	1806	1912	RNASEQG00000014966	15	15	16	15	14	13	1	14	13	1	2295	468	1887	14	1806	15	6163	29836005	29836005	27	45	unchanged
ENSDARG00000005176	ENSDART00000022593	18	38777077	38781242	-1	BC077149.1	1081	873	RNASEQT00000005130	38775563	38781594	2947	873	1270	RNASEQG00000005130	2	1	2	1	1	1	0	0	0	0	53	0	1081	2	873	1	570	38777240	38777240	163	1677	extend	0	1095	1
ENSDARG00000014506	ENSDART00000022605	10	30011006	30013638	-1	BC059663.1	772	606	0	0	0	0	0	0	0	5	4	0	0	4	3	1	3	2	1	1203	181	0	0	0	0	3720	30011081	0	75	No match
ENSDARG00000063538	ENSDART00000022620	6	8270732	8299054	-1	BC115278.1	2923	1416	RNASEQT00000014268	8270732	8485293	6985	5853	5854	RNASEQG00000014268	15	13	42	42	14	14	0	12	12	0	4017	0	2900	14	1416	12	14488	8271863	8271863	1131	1131	trim	137	0
ENSDARG00000014692	ENSDART00000022643	2	41536224	41544584	1	BC055386.1	2077	1398	RNASEQT00000004014	41536129	41544584	2172	1362	1519	RNASEQG00000004014	7	7	7	6	6	6	0	6	6	0	3445	1	2077	7	1362	5	13540	41543931	41543931	653	653	trim	16	0
ENSDARG00000007639	ENSDART00000022646	4	11308223	11350591	-1	BC054913.1	4316	2397	RNASEQT00000020685	11308327	11350618	4239	2397	2677	RNASEQG00000020685	13	12	13	12	12	12	0	11	11	0	2517	1	4212	13	2397	12	16178	11309889	11309889	1666	1562	trim	248	0
ENSDARG00000008966	ENSDART00000022663	2	7552571	7585017	-1	BC056790.1	2052	1089	RNASEQT00000003691	7549013	7585114	6069	1533	1961	RNASEQG00000003691	14	11	16	14	13	12	0	10	9	0	5038	0	2052	12	1089	8	12592	7556543	7553121	632	4108	trim	232	0
ENSDARG00000016375	ENSDART00000022676	19	26140028	26163657	-1	BC067140.1	3975	1683	RNASEQT00000025097	26140050	26163898	5942	1683	1997	RNASEQG00000025097	13	11	12	11	12	11	0	10	10	0	2379	0	3953	11	1683	11	9753	26143995	26143995	2219	3945	extend	0	3610	110
ENSDARG00000007892	ENSDART00000022682	13	24604081	24607688	1	BC054132.1	1344	1077	0	0	0	0	0	0	0	6	6	0	0	5	5	0	5	5	0	797	0	0	0	0	0	2057	24607463	0	225	No match
ENSDARG00000020311	ENSDART00000022684	13	36997497	37008791	1	BC100049.1	1934	435	0	0	0	0	0	0	0	5	5	0	0	4	4	0	4	4	0	3715	3	0	0	0	0	45935	37007338	0	1453	No match
ENSDARG00000021372	ENSDART00000022688	12	1044237	1047410	-1	BC056309.1	2176	969	0	0	0	0	0	0	0	2	1	0	0	1	0	0	0	0	0	0	0	0	0	0	0	43287	1045258	0	1021	No match
ENSDARG00000004049	ENSDART00000022702	20	3351704	3358487	-1	BC095101.1	1657	711	RNASEQT00000015241	3351704	3358592	4734	711	990	RNASEQG00000015241	3	2	2	2	2	1	0	1	1	0	123	0	1657	1	711	2	17165	3355448	3355448	772	3744	extend	0	3319	2
ENSDARG00000019341	ENSDART00000022704	22	15652457	15694938	1	BC109411.1	3203	1665	RNASEQT00000001461	15652336	15694750	3136	1665	2182	RNASEQG00000001461	9	9	9	9	8	8	0	8	8	0	1722	0	3015	9	1665	9	10443	15693796	15693796	1142	954	unchanged
ENSDARG00000009094	ENSDART00000022731	6	40724929	40734664	1	BC076462.1	1905	1284	RNASEQT00000015053	40724742	40734900	2328	1287	1563	RNASEQG00000015053	6	5	6	5	5	5	0	4	4	0	65	0	1905	6	1284	5	444	40734135	40734135	529	765	unchanged
ENSDARG00000016818	ENSDART00000022733	1	51075221	51097709	-1	DQ223861.1	1842	1842	RNASEQT00000009267	51071719	51099567	3825	1977	2079	RNASEQG00000009267	13	13	16	15	12	9	0	12	9	0	49	5	1739	9	1739	10	155	51075221	51073465	0	1746	unchanged
ENSDARG00000015853	ENSDART00000022740	3	10231991	10243809	1	BC065953.1	1177	852	RNASEQT00000021639	10231540	10243906	1725	852	1337	RNASEQG00000021639	7	7	7	7	6	6	0	6	6	0	37349	9	1177	7	852	7	34255	10243518	10243518	291	388	trim	153	0
ENSDARG00000016513	ENSDART00000022758	17	17862052	17900938	1	BC055261.1	3814	1791	RNASEQT00000001836	17862036	17900938	2620	1794	1915	RNASEQG00000001836	13	12	15	13	12	12	0	11	11	0	3072	0	2604	12	1765	11	14505	17899020	17899291	1918	705	trim	8	0
ENSDARG00000018032	ENSDART00000022761	6	39323306	39406168	-1	DQ149509.1	5877	5877	RNASEQT00000014526	39319016	39390285	9767	5466	5477	RNASEQG00000014526	26	26	24	24	25	23	1	25	23	1	1007	25	5382	22	5374	22	4995	39323306	39323306	0	4290	trim	4	0
ENSDARG00000016399	ENSDART00000022765	2	20859746	20872569	1	BC045984.1	1868	1659	RNASEQT00000003795	20859640	20872569	1974	1659	1841	RNASEQG00000003795	17	17	17	17	16	15	1	16	15	1	5971	405	1868	17	1659	17	6563	20872436	20872436	133	133	trim	1755	0
ENSDARG00000009525	ENSDART00000022799	13	25695902	25708623	-1	BC055501.1	2436	1113	RNASEQT00000011330	25695897	25708919	2794	1170	1578	RNASEQG00000011330	12	12	12	12	11	11	0	11	11	0	7830	0	2436	11	1113	11	25835	25697113	25697113	1211	1216	trim	419	0
ENSDARG00000004405	ENSDART00000022803	19	20253051	20262318	-1	BC055622.1	1880	633	RNASEQT00000025049	20253051	20262384	1413	690	862	RNASEQG00000025049	5	5	7	6	4	4	0	4	4	0	1827	0	1307	4	500	3	7741	20254298	20253602	1247	551	trim	8	0
ENSDARG00000002021	ENSDART00000022830	17	20956655	20983043	1	BC134889.1	3570	2532	RNASEQT00000002373	20956386	20983224	4020	2532	2877	RNASEQG00000002373	20	20	20	20	19	19	0	19	19	0	7412	0	3570	20	2532	20	14915	20982081	20982081	962	1143	unchanged
ENSDARG00000018806	ENSDART00000022838	15	42362040	42383557	-1	BC064286.1	3145	1368	RNASEQT00000017475	42362040	42383681	3269	1368	1587	RNASEQG00000017475	7	7	7	7	6	5	1	6	5	1	3379	390	3145	7	1368	7	86104	42363722	42363722	1682	1682	trim	156	0
ENSDARG00000036359	ENSDART00000022840	10	102538	107648	1	BC053125.1	2002	1587	RNASEQT00000023974	101551	107648	2307	1488	1927	RNASEQG00000023974	9	9	11	10	8	8	0	8	8	0	1340	0	1897	7	1488	8	3628	107268	107268	380	380	trim	853	0
ENSDARG00000019715	ENSDART00000022841	1	30002489	30030422	1	BC095283.1	1118	1017	RNASEQT00000008547	30002463	30030426	1148	1017	1061	RNASEQG00000008547	10	10	10	10	9	9	0	9	9	0	1427	0	1118	10	1017	10	1833	30030339	30030339	83	87	trim	749	0
ENSDARG00000052462	ENSDART00000022866	5	58931581	58969113	-1	BC128795.1	2463	1281	RNASEQT00000006131	58931582	58971430	2841	1281	1770	RNASEQG00000006131	7	7	8	7	6	6	0	6	6	0	1200	0	2462	6	1281	7	9611	58932653	58932653	1072	1071	trim	1011	0
ENSDARG00000019398	ENSDART00000022874	17	12818807	12830319	-1	BC055520.1	943	741	RNASEQT00000001792	12818808	12830370	993	741	858	RNASEQG00000001792	7	7	7	7	6	6	0	6	6	0	6879	0	942	7	741	7	9956	12818943	12818943	136	135	trim	77	0
ENSDARG00000004306	ENSDART00000022909	2	32461737	32474566	1	BC071523.1	2052	1725	0	0	0	0	0	0	0	10	10	0	0	9	8	1	9	8	1	1730	197	0	0	0	0	5776	32474279	0	287	No match
ENSDARG00000015780	ENSDART00000022918	7	52366222	52372428	-1	BC094966.1	1360	687	RNASEQT00000007419	52366140	52372479	1493	687	849	RNASEQG00000007419	4	3	4	3	3	3	0	2	2	0	361	0	1360	4	687	3	2748	52366784	52366784	562	644	trim	113	0
ENSDARG00000013670	ENSDART00000022945	10	30661487	30672993	1	BC071372.1	2107	1896	RNASEQT00000024243	30661345	30682717	3985	2943	3296	RNASEQG00000024243	17	16	24	23	16	16	0	15	15	0	11314	1	2107	16	1896	15	20048	30672993	30682028	0	689	trim	12	0
ENSDARG00000003961	ENSDART00000022949	6	41969222	41980214	-1	BC055518.1	2456	1596	RNASEQT00000014579	41969224	41980243	2483	1596	1699	RNASEQG00000014579	11	10	11	10	10	10	0	9	9	0	2174	0	2454	11	1596	10	5021	41970008	41970008	786	784	trim	67	0
ENSDARG00000013858	ENSDART00000022963	2	6780044	6809979	1	BC055188.1	2185	1779	RNASEQT00000004258	6779981	6810697	2575	1407	1790	RNASEQG00000004258	15	15	14	14	14	14	0	14	14	0	422	0	1794	14	1388	14	818	6809893	6809912	86	785	unchanged
ENSDARG00000021293	ENSDART00000022967	3	51295	72129	-1	BC065449.1	1772	1215	RNASEQT00000022203	40075	72236	1629	1215	1413	RNASEQG00000022203	12	11	13	11	11	11	0	10	10	0	10552	42	1338	11	1215	11	9046	51761	51761	466	216	unchanged
ENSDARG00000020102	ENSDART00000022976	21	39593024	39593929	1	AY763409.1	906	840	RNASEQT00000003085	39592797	39610111	3488	1272	1565	RNASEQG00000003085	1	1	2	2	0	0	0	0	0	0	0	0	871	0	805	0	119	39593929	39608188	0	1923	extend	0	1651	0
ENSDARG00000007438	ENSDART00000022999	24	38770295	38784817	-1	BC059506.1	1254	477	RNASEQT00000019868	38770290	38785188	1630	477	976	RNASEQG00000019868	7	6	7	6	6	6	0	5	5	0	11309	3	1254	7	477	6	33577	38770944	38770944	649	654	trim	104	0
ENSDARG00000018921	ENSDART00000023006	20	32795644	32797830	1	BC056807.1	1944	783	RNASEQT00000015478	32795617	32797819	1960	0		No match	2	1	2	0	1	1	0	0	0	0	155	0	1933	2	0	0	6790	32796841		989	1960	trim	1282	0
ENSDARG00000008921	ENSDART00000023012	24	31238091	31250795	1	BC076019.1	1273	984	RNASEQT00000019803	31238105	31250795	1259	984	1106	RNASEQG00000019803	6	6	6	6	5	5	0	5	5	0	158	0	1259	6	984	6	627	31250642	31250642	153	153	trim	571	0
ENSDARG00000019335	ENSDART00000023040	2	48417337	48418865	1	BC065599.1	1238	681	RNASEQT00000004079	48416722	48418865	1853	681	1378	RNASEQG00000004079	4	4	4	4	3	3	0	3	3	0	1039	1	1238	4	681	4	13566	48418390	48418390	475	475	trim	76	0
ENSDARG00000004270	ENSDART00000023054	14	31644573	31662555	1	BC083408.1	1646	1542	RNASEQT00000018259	31644414	31663523	2773	1542	1781	RNASEQG00000018259	14	13	14	13	13	13	0	12	12	0	8118	0	1646	14	1542	13	9807	31662531	31662531	24	992	trim	1130	0
ENSDARG00000009743	ENSDART00000023058	20	47866469	47882064	-1	AY823392.1	1805	1665	RNASEQT00000016226	47865502	47882155	2863	1665	1834	RNASEQG00000016225	10	10	10	10	9	9	0	9	9	0	250	0	1805	10	1665	10	758	47866531	47866531	62	1029	unchanged
ENSDARG00000040738	ENSDART00000023059	9	23050725	23051644	1	BC122429.1	611	537	0	0	0	0	0	0	0	3	3	0	0	2	2	0	2	2	0	1175	0	0	0	0	0	8228	23051607	0	37	No match
ENSDARG00000007886	ENSDART00000023064	20	51573116	51602182	-1	BC090054.1	2841	1308	RNASEQT00000015633	51574040	51602448	2183	1308	1751	RNASEQG00000015633	5	5	5	5	4	4	0	4	4	0	704	0	1917	5	1308	5	8364	51574472	51574472	1356	432	trim	193	0
ENSDARG00000015374	ENSDART00000023072	6	3141388	3212431	1	BC053179.1	1858	1119	RNASEQT00000014760	3141296	3218805	2146	1128	1363	RNASEQG00000014760	12	11	13	11	11	11	0	10	10	0	3490	4	1459	11	1119	11	9482	3211844	3211844	587	783	unchanged
ENSDARG00000007065	ENSDART00000023074	19	31668539	31674298	1	BC093356.1	1099	729	0	0	0	0	0	0	0	7	7	0	0	6	6	0	6	6	0	3705	0	0	0	0	0	7732	31673931	0	367	No match
ENSDARG00000007990	ENSDART00000023084	18	44007258	44031137	-1	BC124087.1	2207	1215	RNASEQT00000005167	44007276	44015989	1540	603	527	No match	9	9	5	3	8	7	0	8	7	0	53	0	1437	3	578	2	494	44008076	44008289	818	1013	extend	0	680	2
ENSDARG00000021573	ENSDART00000023099	23	9974379	9996215	1	BC107979.1	2008	1398	RNASEQT00000010000	9985983	9996283	1944	1398	1525	RNASEQG00000010000	7	4	5	4	6	3	1	3	3	0	63	6	1874	3	1398	4	573	9995864	9995864	351	419	unchanged
ENSDARG00000008662	ENSDART00000023105	9	52086531	52089435	1	BC095207.1	2905	2211	0	0	0	0	0	0	0	1	1	0	0	0	0	0	0	0	0	0	0	0	0	0	0	782	52088751	0	684	No match
ENSDARG00000004342	ENSDART00000023116	11	46192700	46204642	1	BC044186.1	2101	1386	RNASEQT00000000412	46192625	46204644	2178	1386	1598	RNASEQG00000000412	12	12	12	12	11	11	0	11	11	0	29005	7	2101	12	1386	12	85597	46204064	46204064	578	580	trim	13	0
ENSDARG00000003235	ENSDART00000023123	5	60787866	60810126	-1	BC095815.1	2403	2163	RNASEQT00000006149	60787867	60810164	2440	2163	2210	RNASEQG00000006149	17	17	17	17	16	16	0	16	16	0	5666	3	2402	17	2163	17	8765	60788097	60788097	231	230	trim	94	0
ENSDARG00000004221	ENSDART00000023128	12	227141	235068	1	BC055162.1	1964	1845	RNASEQT00000013691	227014	250268	5511	5334	5510	RNASEQG00000013691	10	10	26	26	9	9	0	9	9	0	197	0	1890	9	1841	9	542	234998	250267	70	1	unchanged
ENSDARG00000015968	ENSDART00000023153	15	1713893	1728416	-1	BC045469.1	2053	1413	RNASEQT00000017568	1713946	1728463	2047	1413	1578	RNASEQG00000017568	9	8	9	8	8	8	0	7	7	0	278	2	2000	9	1413	8	1369	1714415	1714415	522	469	unchanged
ENSDARG00000019614	ENSDART00000023163	6	37427118	37461358	-1	BC045468.1	3047	2388	RNASEQT00000014501	37427116	37461465	3224	2388	2708	RNASEQG00000014501	13	10	12	10	12	11	0	9	9	0	2508	0	3047	11	2388	10	11936	37427632	37427632	446	516	trim	806	0
ENSDARG00000019130	ENSDART00000023206	8	17598089	17605590	1	BC146745.1	2413	1974	RNASEQT00000023064	17597864	17605590	2638	1974	2233	RNASEQG00000023064	14	14	14	14	13	13	0	13	13	0	2832	0	2413	14	1974	14	5339	17605185	17605185	405	405	trim	6	0
ENSDARG00000010010	ENSDART00000023210	9	30676347	30681945	1	BC095319.1	1579	1215	RNASEQT00000016872	30676165	30690754	4525	1245	1521	RNASEQG00000016872	2	1	4	2	1	1	0	0	0	0	143	0	1360	1	1215	0	6071	30681705	30681705	240	3004	unchanged
ENSDARG00000015902	ENSDART00000023218	23	27319959	27363808	-1	BC162530.1	2765	2277	RNASEQT00000009715	27314733	27363898	8081	2277	2502	RNASEQG00000009715	21	20	21	20	20	19	1	19	18	1	3655	234	2765	21	2277	20	5278	27320312	27320312	353	5579	extend	0	4588	7
ENSDARG00000013317	ENSDART00000023240	7	23990980	24019260	1	BC055181.1	1707	948	RNASEQT00000007113	23990909	24019264	3363	2529	2759	RNASEQG00000007113	10	9	21	20	9	8	0	8	7	0	2088	0	1707	8	948	7	10319	24016897	24016897	600	604	trim	16	0
ENSDARG00000006926	ENSDART00000023255	19	2125381	2129691	1	BC122246.1	1787	1563	RNASEQT00000024860	2125365	2129691	1803	1563	1700	RNASEQG00000024860	3	3	3	3	2	2	0	2	2	0	24	0	1787	3	1563	3	1337	2129588	2129588	103	103	trim	3	0
ENSDARG00000012390	ENSDART00000023293	20	9401506	9417025	1	BC057416.1	2511	1347	RNASEQT00000015785	9401405	9418333	3920	1347	1515	RNASEQG00000015785	5	5	5	5	4	4	0	4	4	0	575	0	2511	5	1347	5	10022	9415928	9415928	1097	2405	unchanged
ENSDARG00000017086	ENSDART00000023306	5	23804470	23810686	-1	BC151881.1	1584	975	RNASEQT00000005772	23804470	23810736	1634	918	1026	RNASEQG00000005772	4	4	4	3	3	3	0	3	3	0	483	0	1584	4	918	2	5120	23805078	23805078	608	608	trim	30	0
ENSDARG00000003632	ENSDART00000023323	11	37084932	37090800	1	BC154626.1	1175	546	RNASEQT00000000755	37084563	37090691	1435	558	1028	RNASEQG00000000755	3	3	3	3	2	2	0	2	2	0	45	0	1066	3	546	3	1154	37090284	37090284	516	407	unchanged
ENSDARG00000007181	ENSDART00000023325	21	21282566	21298422	1	BC078388.1	1253	846	RNASEQT00000003385	21281847	21309961	939	0	850	No match	12	9	5	0	11	11	0	8	8	0	2362	0	381	2	0	0	2882	21298407	21309872	15	89	unchanged
ENSDARG00000019778	ENSDART00000023336	1	45499247	45505056	-1	BC152627.1	833	750	RNASEQT00000008663	45499247	45505151	928	750	886	RNASEQG00000008663	6	6	6	6	5	5	0	5	5	0	150380	6	833	6	750	6	150488	45499289	45499289	42	42	trim	4	0
ENSDARG00000019489	ENSDART00000023346	2	23053276	23065441	1	BC055569.1	1559	951	RNASEQT00000003828	23053258	23065449	1585	951	1008	RNASEQG00000003828	7	7	7	7	6	6	0	6	6	0	3943	0	1559	7	951	7	17902	23064872	23064872	569	577	trim	3186	0
ENSDARG00000004372	ENSDART00000023359	23	25717875	25736203	1	BC067154.1	3440	1173	RNASEQT00000009696	25715666	25736209	3915	1044	1644	RNASEQG00000009696	11	10	13	9	10	10	0	9	9	0	805	1	3440	10	1044	8	4834	25730076	25730076	2265	2271	trim	433	0
ENSDARG00000016656	ENSDART00000023379	13	33879917	33883359	1	BC086716.1	1265	1005	RNASEQT00000011438	33879869	33883359	1313	1005	1208	RNASEQG00000011438	4	4	4	4	3	3	0	3	3	0	434	0	1265	4	1005	4	2544	33883254	33883254	105	105	trim	145	0
ENSDARG00000008542	ENSDART00000023388	11	38876798	38885764	-1	BC093247.1	1233	906	0	0	0	0	0	0	0	3	2	0	0	2	2	0	1	1	0	267	0	0	0	0	0	3449	38877064	0	266	No match
ENSDARG00000041169	ENSDART00000023421	15	24834885	24858832	-1	AY330295.1	3175	1881	RNASEQT00000017332	24834885	24858924	3267	1881	2065	RNASEQG00000017332	15	15	15	15	14	14	0	14	14	0	15318	1	3175	15	1881	15	57595	24836087	24836087	1202	1202	trim	176	0
ENSDARG00000006600	ENSDART00000023453	25	36976595	36993222	1	BC065337.1	2024	1332	RNASEQT00000010677	36976513	36998536	7330	1332	1515	RNASEQG00000010677	10	10	11	10	9	9	0	9	9	0	4563	0	1934	9	1332	10	19531	36992631	36992631	591	5815	extend	0	1237	0
ENSDARG00000017049	ENSDART00000023454	3	24498484	24509861	1	AY398306.1	1683	1449	RNASEQT00000021803	24498086	24509861	2081	1449	2018	RNASEQG00000021803	13	13	13	13	12	11	1	12	11	1	26977	2111	1683	13	1449	13	13706	24509798	24509798	63	63	trim	592	0
ENSDARG00000013082	ENSDART00000023463	5	33449341	33455009	1	BC049467.1	1766	1518	RNASEQT00000005919	33449008	33455009	2099	1518	2006	RNASEQG00000005919	9	9	9	9	8	8	0	8	8	0	1587	0	1766	9	1518	9	5750	33454916	33454916	93	93	trim	105	0
ENSDARG00000030237	ENSDART00000023470	17	26645160	26655178	1	BC053415.1	2247	606	RNASEQT00000001936	26645096	26655317	1675	606	747	RNASEQG00000001936	3	3	4	3	2	2	0	2	2	0	3476	19	1472	2	606	3	91158	26653614	26653614	1564	928	trim	723	0
ENSDARG00000013789	ENSDART00000023483	4	698193	717412	-1	FJ654702.1	1761	1761	RNASEQT00000020914	697961	717559	2140	1761	1908	RNASEQG00000020914	11	11	11	11	10	10	0	10	10	0	59	0	1761	11	1761	11	171	698193	698193	0	232	unchanged
ENSDARG00000019478	ENSDART00000023484	Zv9_NA947	173812	188906	1	BC075962.1	1469	1011	RNASEQT00000020455	173709	188906	1572	1011	1126	RNASEQG00000020455	12	12	12	12	11	11	0	11	11	0	1945	0	1469	12	1011	12	3979	188460	188460	446	446	trim	132	0
ENSDARG00000016255	ENSDART00000023515	6	49853179	49871984	1	BC045919.1	1961	663	RNASEQT00000014651	49853067	49963584	2992	0	2757	No match	5	5	14	0	4	4	0	4	4	0	1898	0	1640	4	0	0	17273	49870789	49963349	1195	235	trim	362	0
ENSDARG00000021432	ENSDART00000023521	22	21627456	21633314	1	BC162991.1	847	759	0	0	0	0	0	0	0	4	4	0	0	3	0	0	3	0	0	0	0	0	0	0	0	44	21633287	0	27	No match
ENSDARG00000008796	ENSDART00000023526	14	31412646	31414293	1	BC129315.1	1315	618	RNASEQT00000018248	31412555	31414293	1561	0		No match	3	3	2	0	2	1	0	2	1	0	1	0	1315	1	0	0	289	31413648		645	1561	extend	0	28	0
ENSDARG00000018283	ENSDART00000023539	18	30961988	30964342	1	BC056702.1	1033	558	RNASEQT00000005083	30961881	30964331	1129	558	679	RNASEQG00000005083	6	6	6	6	5	5	0	5	5	0	2434	2	1022	6	558	6	5690	30963881	30963881	461	450	trim	160	0
ENSDARG00000017728	ENSDART00000023549	6	29420925	29428078	1	BC075777.1	1368	864	RNASEQT00000014452	29420909	29428071	1377	912	966	RNASEQG00000014452	10	9	10	10	9	9	0	8	8	0	4600	6	1361	10	864	8	5725	29427660	29427660	418	411	trim	475	0
ENSDARG00000024746	ENSDART00000023550	20	54322751	54336692	-1	BC163166.1	2332	2205	RNASEQT00000016379	54327504	54367222	1911	1344	1792	RNASEQG00000016379	11	10	8	6	10	9	0	9	8	0	3338	0	191	0	191	0	13296	54322772	54327623	21	119	unchanged
ENSDARG00000008022	ENSDART00000023568	7	33311275	33355300	-1	BC047799.1	3030	2688	RNASEQT00000007252	33311275	33355416	3146	2688	2951	RNASEQG00000007252	18	17	18	17	17	17	0	16	16	0	2979	0	3030	18	2688	17	5854	33311470	33311470	195	195	trim	351	0
ENSDARG00000027734	ENSDART00000023580	20	28895884	28910709	-1	BC075982.1	2634	858	RNASEQT00000015441	28895885	28910848	2772	858	1053	RNASEQG00000015441	8	7	8	7	7	7	0	6	6	0	6720	0	2633	8	858	7	49232	28897604	28897604	1720	1719	extend	0	1403	1
ENSDARG00000006514	ENSDART00000023613	6	36329659	36331308	-1	BC059551.1	1314	813	0	0	0	0	0	0	0	4	4	0	0	3	0	0	3	0	0	0	0	0	0	0	0	6019	36329967	0	308	No match
ENSDARG00000021232	ENSDART00000023639	8	52507268	52510351	1	U66573.1	1169	810	RNASEQT00000023910	52507212	52510347	1221	810	1052	RNASEQG00000023910	2	2	2	2	1	1	0	1	1	0	14	0	1165	2	810	2	154	52510178	52510178	173	169	unchanged
ENSDARG00000016904	ENSDART00000023676	5	64571037	64616621	1	BC051774.1	2823	1287	RNASEQT00000006176	64570958	64616628	2909	1287	1481	RNASEQG00000006176	11	11	11	11	10	10	0	10	10	0	12555	1	2823	11	1287	11	66238	64615200	64615200	1421	1428	trim	138	0
ENSDARG00000039682	ENSDART00000023677	20	7245372	7255195	-1	BC151914.1	1514	1350	RNASEQT00000015769	7248186	7249638	629	585	627	RNASEQG00000015769	6	6	2	2	5	1	0	5	1	0	5	0	609	0	585	0	443	7245425	7248188	53	2	unchanged
ENSDARG00000014008	ENSDART00000023684	9	44625565	44717304	-1	BC124357.1	3288	2952	RNASEQT00000016540	44625561	44717353	3341	2952	3032	RNASEQG00000016540	21	21	21	21	20	20	0	20	20	0	9006	23	3288	21	2952	21	19347	44625870	44625870	305	309	trim	1006	0
ENSDARG00000035676	ENSDART00000023709	19	37007183	37041053	-1	BC085424.1	1899	525	RNASEQT00000025209	37007183	37041129	1975	525	959	RNASEQG00000025209	7	6	7	6	6	6	0	5	5	0	14495	1	1899	7	525	6	92860	37008199	37008199	1016	1016	trim	279	0
ENSDARG00000003153	ENSDART00000023721	18	22502263	22515674	-1	BC053172.1	1161	687	RNASEQT00000005041	22502263	22515757	1244	687	896	RNASEQG00000005041	7	7	7	7	6	6	0	6	6	0	7217	1	1161	7	687	7	10991	22502611	22502611	348	348	trim	6	0
ENSDARG00000003513	ENSDART00000023747	19	4660783	4674161	-1	BC070004.1	3734	2643	RNASEQT00000024887	4660575	4674224	3918	2556	2839	RNASEQG00000024887	11	10	12	11	10	10	0	9	9	0	7606	12	3647	10	2556	9	62468	4661654	4661654	871	1079	trim	359	0
ENSDARG00000021115	ENSDART00000023751	8	15804400	15822479	-1	BC092864.1	1840	1260	RNASEQT00000023584	15797385	15822481	1166	399	454	RNASEQG00000023584	13	12	5	5	12	12	0	11	11	0	303	0	330	4	169	2	907	15804819	15798097	419	712	unchanged
ENSDARG00000016528	ENSDART00000023763	20	44703824	44713979	1	BC090896.1	2631	2193	RNASEQT00000016158	44703674	44714319	3121	2193	2653	RNASEQG00000016158	4	3	4	3	3	3	0	2	2	0	412	0	2631	4	2193	3	4233	44713851	44713851	128	468	unchanged
ENSDARG00000012387	ENSDART00000023784	5	25700251	25713659	-1	BC071373.1	2347	1182	RNASEQT00000005810	25678604	25716872	4232	2751	3003	RNASEQG00000005810	11	11	28	27	10	10	0	10	10	0	17969	2	735	5	612	6	49160	25701293	25679833	1042	1229	trim	51	0
ENSDARG00000013963	ENSDART00000023793	23	6688432	6692035	-1	BC155722.1	2129	792	RNASEQT00000009980	6688853	6692040	1713	792	1254	RNASEQG00000009980	4	4	4	4	3	3	0	3	3	0	1181	3	1708	4	792	4	19859	6689312	6689312	880	459	unchanged
ENSDARG00000079271	ENSDART00000023796	12	3635059	3645292	-1	BC093141.1	1088	735	RNASEQT00000013277	3635065	3645664	1354	735	1203	RNASEQG00000013277	9	8	10	8	8	8	0	7	7	0	1326	0	982	8	735	8	2192	3635316	3635316	257	151	trim	74	0
ENSDARG00000010347	ENSDART00000023797	8	20770440	20783910	-1	BC092849.1	1573	801	RNASEQT00000023629	20769767	20784181	2517	864	1252	RNASEQG00000023629	7	6	7	7	6	6	0	5	5	0	3384	0	1573	7	801	5	22952	20771032	20771032	592	1265	unchanged
ENSDARG00000021112	ENSDART00000023803	13	4311924	4318911	-1	BC083407.1	822	447	RNASEQT00000011157	4311924	4318946	857	447	518	RNASEQG00000011157	5	4	5	4	4	4	0	3	3	0	2456	0	822	5	447	4	7995	4312263	4312263	339	339	trim	45	0
ENSDARG00000004470	ENSDART00000023814	3	46802151	46833213	1	BC046883.1	1913	1590	RNASEQT00000022068	46800538	46833213	2375	1590	2156	RNASEQG00000022068	18	16	19	16	17	16	1	15	14	1	37594	3875	1913	17	1590	16	15886	46830082	46830082	219	219	trim	191	0
ENSDARG00000008292	ENSDART00000023833	24	17532531	17552055	1	AY648723.1	2015	1419	RNASEQT00000019668	17532388	17552050	1806	1419	1514	RNASEQG00000019668	12	12	13	12	11	11	0	11	11	0	38661	7	1711	11	1419	12	54549	17551758	17551758	297	292	trim	328	0
ENSDARG00000003920	ENSDART00000023834	21	11428694	11432572	-1	AY398416.1	1859	828	RNASEQT00000002803	11428694	11432639	1926	828	1111	RNASEQG00000002803	8	8	8	8	7	7	0	7	7	0	41184	24	1859	8	828	8	142788	11429509	11429509	815	815	trim	846	0
ENSDARG00000007108	ENSDART00000023838	21	33910851	33938572	-1	BC078354.1	1659	1365	RNASEQT00000003024	33910851	33938708	1795	1365	1529	RNASEQG00000003024	11	11	11	11	10	10	0	10	10	0	2671	0	1659	11	1365	11	4808	33911117	33911117	266	266	trim	324	0
ENSDARG00000009273	ENSDART00000023842	15	26268978	26275160	1	BC066440.1	2448	1608	RNASEQT00000017346	26268345	26275164	3085	1608	2325	RNASEQG00000017346	6	6	6	6	5	5	0	5	5	0	2428	1	2448	6	1608	6	18951	26274404	26274404	756	760	trim	148	0
ENSDARG00000017407	ENSDART00000023846	Zv9_scaffold3512	46746	82380	1	BC048032.1	1997	1878	RNASEQT00000019606	46157	82388	2594	1878	2515	RNASEQG00000019604	14	14	14	14	13	13	0	13	13	0	1302	0	1997	14	1878	14	2250	82309	82309	71	79	unchanged
ENSDARG00000018809	ENSDART00000023851	2	11646751	11703651	-1	BC081676.1	1434	1239	RNASEQT00000004315	11646162	11703693	2065	1239	1438	RNASEQG00000004315	9	9	9	9	8	8	0	8	8	0	362	0	1434	9	1239	9	783	11646789	11646789	38	627	unchanged
ENSDARG00000057853	ENSDART00000023859	3	15664661	15675444	-1	BC152275.1	1522	465	RNASEQT00000021699	15664660	15675753	1832	465	897	RNASEQG00000021699	4	3	4	3	3	3	0	2	2	0	12069	158	1522	4	465	3	96026	15665595	15665595	934	935	trim	168	0
ENSDARG00000015352	ENSDART00000023867	11	35028904	35041579	1	BC066695.1	2282	1923	RNASEQT00000000739	35028671	35060613	3767	1923	2242	RNASEQG00000000739	14	14	22	14	13	12	1	13	12	1	5043	301	2043	13	1923	14	12087	35041306	35041306	273	1525	unchanged
ENSDARG00000013312	ENSDART00000023890	25	28804493	28989119	1	BC092749.1	1616	1191	RNASEQT00000011001	28804289	29006281	1811	1452	1753	RNASEQG00000011001	6	6	8	8	5	4	1	5	4	1	174	44	1284	5	1187	5	1026	28988791	29006223	328	58	unchanged
ENSDARG00000005126	ENSDART00000023917	4	60316294	60350179	-1	AY662338.1	2492	2274	RNASEQT00000021546	60312678	60360021	6640	2274	2806	RNASEQG00000021546	14	14	15	14	13	13	0	13	13	0	441	0	2492	13	2274	14	1541	60316512	60316512	218	3834	unchanged
ENSDARG00000003016	ENSDART00000023931	2	56950887	56976833	1	BC045488.1	2839	2577	RNASEQT00000004137	56950801	56976838	2930	2577	2748	RNASEQG00000004137	13	13	13	13	12	12	0	12	12	0	272395	155	2839	13	2577	13	753372	56976656	56976656	177	182	trim	152	0
ENSDARG00000006791	ENSDART00000023959	25	18381074	18406082	-1	BC044135.1	2325	1881	RNASEQT00000010522	18381076	18394868	2112	1713	1807	RNASEQG00000010522	19	17	15	15	18	16	0	16	14	0	6320	0	2025	14	1713	14	10409	18381381	18381381	307	305	trim	477	0
ENSDARG00000005392	ENSDART00000023971	8	13881901	13899302	1	BC134942.1	2029	1806	RNASEQT00000023026	13881787	13930068	6319	0	5701	No match	16	15	39	0	15	14	1	14	13	1	432	34	1837	15	0	0	787	13899218	13929450	84	618	extend	0	578	110
ENSDARG00000009745	ENSDART00000023977	5	34017645	34034544	-1	BC095232.1	3177	1368	RNASEQT00000005930	34017646	34034804	3436	1368	2084	RNASEQG00000005930	7	6	7	6	6	6	0	5	5	0	2949	1	3176	7	1368	6	24757	34018998	34018998	1353	1352	trim	946	0
ENSDARG00000016733	ENSDART00000023983	5	72352361	72365894	-1	BC044467.1	1650	1107	0	0	0	0	0	0	0	9	9	0	0	8	8	0	8	8	0	2705	0	0	0	0	0	10889	72352771	0	410	No match
ENSDARG00000015922	ENSDART00000023985	3	16461966	16492889	1	BC125921.1	2614	1077	RNASEQT00000021715	16461883	16492889	2697	1077	1241	RNASEQG00000021715	8	7	8	7	7	7	0	6	6	0	8543	0	2614	8	1077	7	21773	16491433	16491433	1456	1456	trim	115	0
ENSDARG00000016754	ENSDART00000023997	21	7484927	7510630	1	BC046032.1	673	327	RNASEQT00000002763	7484881	7510630	719	327	482	RNASEQG00000002763	4	4	4	4	3	3	0	3	3	0	4841	0	673	4	327	4	9566	7510393	7510393	237	237	trim	118	0
ENSDARG00000003191	ENSDART00000024013	25	30145703	30180070	1	BC076497.1	1934	1593	RNASEQT00000010621	30026524	30180180	2549	1818	2122	RNASEQG00000010621	10	10	11	11	9	8	0	9	8	0	17779	1	1667	8	1350	8	49122	30179753	30179753	317	427	trim	363	0
ENSDARG00000069937	ENSDART00000024031	3	48319132	48393948	1	BC097134.1	2572	2268	RNASEQT00000022755	48318800	48403031	5318	2583	3115	RNASEQG00000022755	18	18	21	21	17	16	1	17	16	1	12144	595	2464	17	2264	17	8988	48393844	48400828	104	2203	unchanged
ENSDARG00000017311	ENSDART00000024034	2	45546374	45565984	-1	BC054918.1	2827	1950	RNASEQT00000004635	45546272	45566123	3287	2013	2479	RNASEQG00000004635	15	13	17	14	14	14	0	12	12	0	2889	0	2827	15	1950	12	8608	45547080	45547080	706	808	unchanged
ENSDARG00000007024	ENSDART00000024046	11	8306954	8313914	-1	BC076466.1	984	897	RNASEQT00000000113	8306954	8314943	987	897	925	RNASEQG00000000113	8	8	9	8	7	7	0	7	7	0	3136	1	983	7	897	8	5301	8307016	8307016	62	62	trim	9	0
ENSDARG00000029881	ENSDART00000024058	2	23695890	23783096	-1	DQ022613.1	3762	3762	RNASEQT00000004396	23695476	23783452	4532	3762	4118	RNASEQG00000004396	15	15	15	15	14	14	0	14	14	0	150	0	3762	15	3762	15	804	23695890	23695890	0	414	unchanged
ENSDARG00000008553	ENSDART00000024059	17	2900956	2939580	1	BC115301.1	2454	2076	RNASEQT00000001721	2896815	2939580	2541	2082	2180	RNASEQG00000001721	21	21	22	21	20	16	0	20	16	0	358	0	2442	17	2069	18	964	2939219	2939219	361	361	trim	1	0
ENSDARG00000014386	ENSDART00000024064	23	27004239	27025246	-1	BC067340.1	2785	1860	RNASEQT00000009710	27004239	27025419	2958	1860	2191	RNASEQG00000009710	11	10	11	10	10	10	0	9	9	0	3341	2	2785	11	1860	10	15316	27005006	27005006	767	767	trim	387	0
ENSDARG00000009825	ENSDART00000024068	18	44407516	44422013	1	BC092954.1	1659	1134	0	0	0	0	0	0	0	8	8	0	0	7	7	0	7	7	0	266	0	0	0	0	0	955	44421667	0	346	No match
ENSDARG00000002240	ENSDART00000024082	23	44653400	44662158	-1	BC092699.1	791	699	RNASEQT00000010312	44652953	44662721	1801	699	1281	RNASEQG00000010312	6	6	6	6	5	5	0	5	5	0	6392	1	791	6	699	6	9193	44653473	44653473	73	520	unchanged
ENSDARG00000020956	ENSDART00000024084	24	12824155	12842687	-1	BC063985.1	3043	1911	0	0	0	0	0	0	0	10	10	0	0	9	9	0	9	9	0	3538	9	0	0	0	0	26073	12825205	0	1050	No match
ENSDARG00000014673	ENSDART00000024087	18	40047902	40049738	-1	BC163365.1	1837	1737	0	0	0	0	0	0	0	1	1	0	0	0	0	0	0	0	0	0	0	0	0	0	0	3645	40047932	0	30	No match
ENSDARG00000008887	ENSDART00000024109	13	33914317	33919871	1	BC055594.1	1566	1395	RNASEQT00000011904	33912905	33921376	2416	1443	1587	RNASEQG00000011904	8	8	10	10	7	7	0	7	7	0	1148	0	1389	6	1389	6	4074	33919700	33920547	171	829	unchanged
ENSDARG00000006624	ENSDART00000024127	10	18909076	18936891	1	BC056824.1	1890	1347	RNASEQT00000024149	18907120	18937456	3225	1347	2202	RNASEQG00000024149	10	10	11	10	9	8	1	9	8	1	4804	658	1890	9	1347	10	15521	18936433	18936433	458	1023	trim	337	0
ENSDARG00000021135	ENSDART00000024132	7	25206565	25214091	-1	BC056583.1	1198	774	RNASEQT00000007899	25206335	25214186	1523	831	959	RNASEQG00000007899	10	8	10	8	9	9	0	7	7	0	1817	0	1198	10	774	8	3104	25208726	25208726	334	564	unchanged
ENSDARG00000039522	ENSDART00000024135	2	1812389	1822105	-1	BC095770.1	1593	1350	RNASEQT00000004195	1694284	1822348	745	444	698	RNASEQG00000004195	4	4	5	5	3	3	0	3	3	0	690	0	413	3	402	3	3067	1812621	1694331	232	47	unchanged
ENSDARG00000010680	ENSDART00000024136	3	23384081	23387307	1	BC059612.1	491	210	0	0	0	0	0	0	0	3	2	0	0	2	2	0	1	1	0	1622	0	0	0	0	0	4851	23387096	0	211	No match
ENSDARG00000010085	ENSDART00000024137	21	41503351	41537355	-1	BC076508.1	1933	1545	RNASEQT00000003555	41503283	41537594	2306	1611	1992	RNASEQG00000003555	14	13	15	14	13	13	0	12	12	0	2308	0	1933	14	1545	13	3118	41503597	41503597	246	314	unchanged
ENSDARG00000008680	ENSDART00000024140	19	49796246	49809494	-1	BC107501.1	974	609	0	0	0	0	0	0	0	6	6	0	0	5	4	0	5	4	0	2725	0	0	0	0	0	18214	49796476	0	230	No match
ENSDARG00000010332	ENSDART00000024185	7	59996663	60002961	1	AY307110.1	2573	2433	RNASEQT00000008136	59990761	60003991	5340	2433	4233	RNASEQG00000008136	18	18	22	18	17	16	1	17	16	1	30110	2045	2573	17	2433	18	53851	60002884	60002884	77	1107	unchanged
ENSDARG00000010149	ENSDART00000024199	21	5320113	5331830	1	BC124811.1	1850	1656	RNASEQT00000002737	5320029	5331830	1934	1656	1791	RNASEQG00000002737	11	11	11	11	10	10	0	10	10	0	104213	17	1850	11	1656	11	207914	5331687	5331687	143	143	trim	145	0
ENSDARG00000018025	ENSDART00000024207	5	57916067	57923009	-1	BC068364.1	3304	2061	RNASEQT00000006121	57916067	57923850	4145	2061	3273	RNASEQG00000006121	7	7	7	7	6	6	0	6	6	0	736	0	3304	7	2061	7	5440	57916939	57916939	872	872	trim	1860	0
ENSDARG00000014499	ENSDART00000024208	19	21260408	21266054	1	BC078197.1	732	387	RNASEQT00000025557	21260204	21266469	1351	387	714	RNASEQG00000025557	5	4	5	4	4	4	0	3	3	0	4726	0	732	5	387	4	7633	21265832	21265832	222	637	unchanged
ENSDARG00000052348	ENSDART00000024215	1	53288211	53316592	1	BC133097.1	3577	3087	RNASEQT00000008748	53288097	53316592	3691	3108	3324	RNASEQG00000008748	24	24	24	24	23	23	0	23	23	0	31205	6	3577	24	3087	24	56439	53316225	53316225	367	367	trim	208	0
ENSDARG00000015854	ENSDART00000024225	13	29632961	29644423	-1	EU660883.1	1914	1914	RNASEQT00000011369	29630619	29645392	4906	1914	2564	RNASEQG00000011369	14	14	15	14	13	13	0	13	13	0	714	0	1914	13	1914	14	1342	29632961	29632961	0	2342	trim	1	0
ENSDARG00000011371	ENSDART00000024248	21	10408818	10420447	-1	BC053255.1	1549	930	RNASEQT00000002796	10408813	10420762	1869	972	1364	RNASEQG00000002796	6	6	6	6	5	5	0	5	5	0	1103	0	1549	6	930	6	4277	10409318	10409318	500	505	trim	112	0
ENSDARG00000021241	ENSDART00000024287	21	26952799	26964610	1	BC142895.1	1434	897	RNASEQT00000003450	26952777	26964795	1641	897	967	RNASEQG00000003450	7	6	7	6	6	5	1	5	5	0	124	6	1434	7	897	6	465	26961654	26961654	489	674	unchanged
ENSDARG00000077037	ENSDART00000024292	19	31081859	31098788	-1	BC139888.1	3000	1545	RNASEQT00000025147	31081859	31098814	3026	1545	1663	RNASEQG00000025147	11	10	11	10	10	10	0	9	9	0	5586	1	3000	11	1545	10	24015	31083222	31083222	1363	1363	trim	296	0
ENSDARG00000004632	ENSDART00000024296	11	32383282	32428576	1	BC076001.1	1943	1008	RNASEQT00000000311	32383081	32428576	2144	1077	1446	RNASEQG00000000311	5	5	5	5	4	4	0	4	4	0	1876	0	1943	5	1008	5	9488	32427878	32427878	698	698	trim	191	0
ENSDARG00000017298	ENSDART00000024299	13	942599	957862	-1	BC061706.1	1909	1065	RNASEQT00000011613	943250	951888	1160	921	1006	RNASEQG00000011613	9	9	8	8	8	7	0	8	7	0	256	0	1160	7	921	7	994	943404	943404	805	154	unchanged
ENSDARG00000010519	ENSDART00000024304	11	41435218	41490992	1	AF254792.1	4751	3846	RNASEQT00000000791	41435213	41491170	4934	3846	4115	RNASEQG00000000791	23	22	23	22	22	22	0	21	21	0	4476	2	4751	23	3846	22	18999	41490351	41490351	641	819	unchanged
ENSDARG00000006782	ENSDART00000024309	21	22075723	22132257	-1	BC125966.1	3537	2712	RNASEQT00000003403	22071518	22132460	6231	2712	3054	RNASEQG00000003403	27	27	28	27	26	26	0	26	26	0	6061	0	3537	26	2712	27	13940	22076409	22076409	686	3177	unchanged
ENSDARG00000019507	ENSDART00000024316	3	27023677	27035630	-1	BC068359.1	2607	2211	RNASEQT00000021838	27023670	27035741	2725	2211	2423	RNASEQG00000021838	16	16	16	16	15	15	0	15	15	0	32354	0	2607	16	2211	16	23112	27023972	27023972	295	302	trim	3056	0
ENSDARG00000004757	ENSDART00000024320	8	49299970	49308162	-1	BC050156.1	1450	930	RNASEQT00000023343	49299970	49308837	2125	930	1748	RNASEQG00000023343	8	7	8	7	7	7	0	6	6	0	91294	39	1450	8	930	7	262925	49300926	49300926	377	377	trim	524	0
ENSDARG00000012903	ENSDART00000024328	1	13317179	13327647	1	BC096858.1	2615	1896	RNASEQT00000008409	13317074	13327647	2720	1896	2253	RNASEQG00000008409	13	12	13	12	12	12	0	11	11	0	503	0	2615	13	1896	12	3547	13327180	13327180	467	467	trim	3	0
ENSDARG00000005335	ENSDART00000024342	21	44228176	44233846	1	BC062384.1	1714	1662	0	0	0	0	0	0	0	10	10	0	0	9	9	0	9	9	0	128	0	0	0	0	0	355	44233811	0	35	No match
ENSDARG00000021172	ENSDART00000024350	20	25564280	25571790	-1	BC045948.1	1898	1479	RNASEQT00000015392	25564364	25571891	1915	1479	1631	RNASEQG00000015392	9	9	9	9	8	8	0	8	8	0	2077	0	1814	9	1479	9	8758	25564648	25564648	368	284	trim	326	0
ENSDARG00000006840	ENSDART00000024379	17	49077695	49091737	-1	BC062527.1	1282	885	RNASEQT00000002091	49077682	49091901	1377	885	1126	RNASEQG00000002091	6	6	7	6	5	5	0	5	5	0	3312	0	1200	5	885	6	8794	49078015	49078015	320	251	trim	12	0
ENSDARG00000002332	ENSDART00000024386	13	37359952	37392735	1	BC095176.1	2355	1851	RNASEQT00000011929	37359695	37398389	5021	1851	2436	RNASEQG00000011929	14	13	15	13	13	13	0	12	12	0	1652	0	2355	13	1851	13	4233	37392559	37392559	176	2585	unchanged
ENSDARG00000009550	ENSDART00000024440	14	35644823	35646509	1	AY331584.1	1300	1152	RNASEQT00000018727	35644274	35647000	2340	1152	1791	RNASEQG00000018727	2	2	2	2	1	1	0	1	1	0	84	0	1300	2	1152	2	3940	35646451	35646451	58	549	unchanged
ENSDARG00000002271	ENSDART00000024450	10	15631656	15641869	1	BC050491.1	1868	639	RNASEQT00000024119	15631490	15641869	2034	639	938	RNASEQG00000024119	5	4	5	4	4	3	1	3	3	0	3685	1065	1868	5	639	4	59193	15640773	15640773	1096	1096	trim	226	0
ENSDARG00000012144	ENSDART00000024528	20	29243759	29251035	1	BC116477.1	1832	714	RNASEQT00000015909	29243590	29252103	1283	735	1031	RNASEQG00000015909	5	5	6	6	4	4	0	4	4	0	3554	1	837	4	710	4	16241	29250044	29251851	991	252	unchanged
ENSDARG00000025641	ENSDART00000024555	9	38194145	38349217	1	AF085746.2	6039	4320	RNASEQT00000016487	38194053	38348965	5879	4320	4773	RNASEQG00000016487	14	13	14	13	13	13	0	12	12	0	795	3	5787	14	4320	13	7284	38347859	38347859	1358	1106	trim	252	0
ENSDARG00000009443	ENSDART00000024558	17	42998722	43003011	1	BC075900.1	1583	1539	RNASEQT00000002549	42999871	43003011	1344	636	1304	RNASEQG00000002549	10	10	7	5	9	6	0	9	6	0	26	0	1264	5	636	4	155	43002971	43002971	40	40	unchanged
ENSDARG00000020642	ENSDART00000024572	9	26874065	26945232	1	BC092932.1	1480	1302	RNASEQT00000016378	26873470	26945309	2152	1302	1957	RNASEQG00000016378	11	10	11	10	10	10	0	9	9	0	998	0	1480	11	1302	10	1963	26945114	26945114	118	195	trim	1579	0
ENSDARG00000008447	ENSDART00000024576	18	5622185	5636223	1	BC045387.1	2279	1350	RNASEQT00000004874	5622096	5636221	2369	1353	1723	RNASEQG00000004874	10	10	10	10	9	9	0	9	9	0	10455	5	2277	9	1350	9	32192	5635575	5635575	648	646	trim	138	0
ENSDARG00000012871	ENSDART00000024578	6	49693937	49712542	1	BC155148.1	2086	1578	RNASEQT00000014645	49693762	49712535	2254	1578	1756	RNASEQG00000014645	12	12	12	12	11	11	0	11	11	0	12583	6	2079	12	1578	12	32607	49712037	49712037	505	498	trim	1992	0
ENSDARG00000012306	ENSDART00000024590	7	40108163	40126345	1	BC093178.1	1718	1263	RNASEQT00000007324	40108142	40129608	5002	1263	1599	RNASEQG00000007324	8	6	8	6	7	7	0	5	5	0	1045	0	1718	8	1263	6	3863	40126205	40126205	140	3403	extend	0	2590	0
ENSDARG00000005536	ENSDART00000024595	20	27122684	27137312	1	BC044390.1	2084	1233	RNASEQT00000015422	27122526	27137306	2236	1233	1593	RNASEQG00000015422	11	11	11	11	10	10	0	10	10	0	6972	1	2078	11	1233	11	14709	27136663	27136663	649	643	trim	132	0
ENSDARG00000016396	ENSDART00000024616	21	11294793	11324785	-1	BC078224.1	1246	561	RNASEQT00000002800	11288933	11324830	7148	558	758	RNASEQG00000002800	6	6	6	6	5	5	0	5	5	0	456	0	1243	5	558	5	1581	11295323	11295323	530	6390	extend	0	3377	1
ENSDARG00000005026	ENSDART00000024639	19	21891006	21895246	1	BC163536.1	4241	3477	RNASEQT00000025066	21844850	21895855	8808	3420	7561	RNASEQG00000025066	1	1	3	2	0	0	0	0	0	0	0	1	4018	0	3380	0	13555	21894608	21894608	638	1247	trim	4	0
ENSDARG00000010732	ENSDART00000024644	10	44598003	44662728	1	BC059635.1	1333	1074	RNASEQT00000024358	44597683	44662738	1663	1074	1473	RNASEQG00000024358	8	8	8	8	7	7	0	7	7	0	1054	0	1333	8	1074	8	2477	44662548	44662548	180	190	trim	111	0
ENSDARG00000011605	ENSDART00000024647	4	19005552	19016003	-1	BC044201.1	3081	1728	RNASEQT00000020778	19005549	19016111	3192	1728	1875	RNASEQG00000020778	20	20	20	20	19	19	0	19	19	0	5556	0	3081	20	1728	20	13463	19006866	19006866	1314	1317	trim	486	0
ENSDARG00000012816	ENSDART00000024677	2	8045582	8096539	1	BC085407.1	1857	1299	RNASEQT00000004278	8045439	8096655	2116	1299	1810	RNASEQG00000004278	4	3	4	3	3	3	0	2	2	0	345	0	1857	4	1299	3	3203	8096349	8096349	190	306	unchanged
ENSDARG00000007867	ENSDART00000024695	23	33932273	33942988	1	BC063229.1	2006	513	RNASEQT00000010204	33932198	33958747	1896	513	746	RNASEQG00000010204	4	4	5	4	3	3	0	3	3	0	3580	2	1806	3	513	4	33515	33941653	33941653	1335	1150	unchanged
ENSDARG00000010571	ENSDART00000024722	24	17894640	17913559	1	BC124588.1	3746	2283	RNASEQT00000020071	17894602	17918170	7316	2283	2687	RNASEQG00000020070	20	19	21	19	19	18	1	18	17	1	6081	302	2954	19	2283	19	21172	17912462	17912462	1097	4629	unchanged
ENSDARG00000017219	ENSDART00000024729	16	58353412	58375207	1	BC099992.1	2395	1905	RNASEQT00000012646	58353040	58375367	2906	1905	2587	RNASEQG00000012646	15	14	15	14	14	14	0	13	13	0	137309	21	2374	14	1905	14	276961	58374602	58374602	180	319	trim	105	0
ENSDARG00000006408	ENSDART00000024750	21	33085606	33095592	1	BC093186.1	1379	597	RNASEQT00000003017	33085583	33095491	1301	597	754	RNASEQG00000003017	5	4	5	4	4	4	0	3	3	0	8232	1	1278	5	597	4	34593	33094944	33094944	648	547	trim	703	0
ENSDARG00000045560	ENSDART00000024775	4	16795025	16861336	-1	BC085629.1	4154	3510	RNASEQT00000020760	16795027	16861384	4610	3783	3949	RNASEQG00000020760	29	29	34	33	28	26	0	28	26	0	7815	1	4131	27	3379	26	16553	16795551	16800236	526	661	trim	40	0
ENSDARG00000005645	ENSDART00000024778	10	32312907	32453220	-1	AF337036.1	5356	4170	RNASEQT00000024249	32312907	32453285	5421	4170	4644	RNASEQG00000024249	27	27	27	27	26	26	0	26	26	0	3471	0	5356	27	4170	27	8156	32313684	32313684	777	777	trim	9	0
ENSDARG00000010462	ENSDART00000024806	9	2590375	2592972	-1	AY731230.1	1957	1320	RNASEQT00000016055	2590375	2593333	2419	1320	1761	RNASEQG00000016055	3	2	2	2	2	1	0	1	1	0	21	0	1957	1	1320	2	1869	2591033	2591033	557	658	trim	184	0
ENSDARG00000012432	ENSDART00000024815	5	25254155	25265230	-1	BC059652.1	2020	987	RNASEQT00000005802	25187336	25266893	6949	0	5723	No match	10	10	30	0	9	9	0	9	9	0	12129	11	1605	8	0	0	39421	25254861	25188562	706	1226	trim	432	0
[truncated: 7,110 more rows]
