# Supplementary material for: Incorporating RNA-seq data into the zebrafish Ensembl genebuild
Source: HighWire-hosted journal article supplement (doi:10.1101/gr.137901.112), 2012-07-12
Supplement: Supplemental_Table_3.docx [file Supplemental_Table_3.docx]

Supplementary Table 2

Read coverage of cDNA supported Ensembl models

| reads per base | **<0.01** | **>=0.01 and <0.1** | **>=0.1 and <1** | **>=1 and <10** | **>=10 and <100** | **>=100 and <1000** | **> =1000** | **Total number of models** |
| --- | --- | --- | --- | --- | --- | --- | --- | --- |
| Multi exon without model | 14 | 63 | 227 | 383 | 99 | 15 | 0 | 801 |
| Single exon without model | 5 | 18 | 60 | 109 | 24 | 4 | 0 | 220 |
| Multi exon with model | 1 | 97 | 1579 | 4770 | 1152 | 103 | 1 | 7703 |
| Single exon with model | 0 | 11 | 42 | 38 | 7 | 0 | 0 | 98 |
| % Multi exon with model | 7 | 61 | 87 | 93 | 92 | 87 | 100 |  |
| % Single exon with model | 0 | 38 | 41 | 26 | 23 | 0 |  |  |
