# Supplementary material for: Incorporating RNA-seq data into the zebrafish Ensembl genebuild
Source: HighWire-hosted journal article supplement (doi:10.1101/gr.137901.112), 2012-07-12
Supplement: Supplemental_Table_4.xlsx [file Supplemental_Table_4.xlsx]

## Sheet: Sheet1
Transcript identifier in Ensembl version 60	Zv9 co-ordinates	Transcript length	Matching REFSEQ prediction	Amplified Fragment size	Tissue Amplified	Fragment Sequenced	1st Round Primer 1	1st Round Primer 2	2nd Round primer 1	2nd Round Primer 2
RNASEQT00000015834	20:19285310-19345381	2428	XM_691297	2226	3dpf	Amplified fragment directly sequenced	ACTGGCCGTGGTGCTGAT	ACTGACAATAAGGAGAAACATCACC	GCAAGATCGCCACTGACAT	CATCATGAGTTTTATGGCACCT
RNASEQT00000015341	20:19347367-19438035	4103	XM_003200690	1136	5dpf	Amplified fragment cloned before sequencing	TCTCAGTCAATGAAGGGTTAATG	CTGCTGTTTTGTGGTGCTGT	ATAGGCTGCTCGTGTCCACT	GTGGCAGTGCTGTGAATGAG
RNASEQT00000015837	20:19851550-19861082	1159	XM_003200693	1052	Male head	Amplified fragment directly sequenced	TGCTGGAAGAAGTGAAAAGAAG	CCCACGACATTGGGGTATAA	AAGAAGTTTAGGGCAGGCTGA	GCCTGCTGGGCATTATTTAG
RNASEQT00000015844	20:20785545-20794779	1167	nothing	993	Male head	Amplified fragment directly sequenced	TCTTCTTTCTTTGCGTTTCTGTC	CATTTCTAAGGCTCCTTTTCCA	GCGTTTCTGTCATTCTGTCTATTTT	CATTTCTAAGGCTCCTTTTCCA
RNASEQT00000015646	20:52926081-53067230	5159	XM_003200778+XM_003200780	2426	Male head	Amplified fragment directly sequenced	GCTGGGATCTGTTGTGCTG	TGATTTTATCTAACGGCTGCATT	GTTGTGCTGCTCCGGTCT	GGCTGCATTAAAACACACACA
RNASEQT00000016233	20:48664244-48697834	3238	XM_002665782	3060	3dpf	Amplified fragment directly sequenced	TTGATCATGGCGCCTCCT	AAACAACTTGTGTTGTGTCGAGAT	CGTGATGCCCGTGATGAT	TGTGTTGTGTCGAGATAGAGAGAAA
RNASEQT00000016002	20:37685837-37761347	1867	XM_685654	1041	Male head	Amplified fragment directly sequenced	GGCTCCACACACACAGAGAC	CACGTTCCCTTCTGGCAAT	AGACAGCGATGCTTGTTCCT	AAGCCAATGCAGGTCTGTG
RNASEQT00000015427	20:27676379-27712432	3598	XM_690886	3251	Male head	Amplified fragment directly sequenced	GCAGATCACATGCTGCAGTT	CAGCGAATGAAAACCAGTACA	GGAGGAGACCGACTAAACTCA	ACATGTACAGTGCTTACAGTAAAACAT
RNASEQT00000015993	20:36258481-36322932	1959	XM_687375	832	Male head	Amplified fragment directly sequenced	TTGTTGCAAATATTAAGCAGAAGA	TTTGTCAACGTTTCTTTTCACTTC	GCGCTAAGCATCGTCTTCTC	CGCCTCAAAGTGGTAAAGGA
RNASEQT00000015781	20:9236671-9273097	2489	XM_002665672	1651	Male head	Amplified fragment directly sequenced	TGCTGGCCACTATAATTAGCAA	CAGGGGTGTCAACCCAGTAT	TTAGCAAACAAGATAAAACTTGAAAA	CTTTCTTGGGCCTTGTTCAG
