# Supplementary material for: Incorporating RNA-seq data into the zebrafish Ensembl genebuild
Source: HighWire-hosted journal article supplement (doi:10.1101/gr.137901.112), 2012-07-12
Supplement: SuppTableLegends.docx [file SuppTableLegends.docx]

Supplementary Table 1 – Libraries and Zv9 sequence alignments

Supplementary Table 2 – Comparison of cDNA supported Ensembl transcripts and RNA-seq only models

Supplementary Table 3 – Read coverage of cDNA supported Ensembl models

Supplementary Table 4 – RNA-seq model confirmation primers
